# Supplementary material
Source: publisher figshare collection journal article supplement (https://acs.figshare.com/ndownloader/files/6911852)
Supplement: Supplementary file 1 [file 6911852]

## Sheet: Supp. Table 1A
Supplementary Table 1A: List of proteins (only leading protein shown) identified from database search of individual cell line models with ABPP (Supplementary Figure S1A)
A375	WM164	1205Lu	WM793
1433B_HUMAN	1433B_HUMAN	1433B_HUMAN	1433B_HUMAN
1433E_HUMAN	1433E_HUMAN	1433E_HUMAN	1433E_HUMAN
1433F_HUMAN	1433F_HUMAN	1433F_HUMAN	1433F_HUMAN
1433G_HUMAN	1433G_HUMAN	1433G_HUMAN	1433G_HUMAN
1433T_HUMAN	1433S_HUMAN	1433T_HUMAN	1433T_HUMAN
1433Z_HUMAN	1433T_HUMAN	1433Z_HUMAN	1433Z_HUMAN
1A02_HUMAN	1433Z_HUMAN	1A01_HUMAN	1A03_HUMAN
2A5A_HUMAN	1A24_HUMAN	1B51_HUMAN	2A5D_HUMAN
2AAA_HUMAN	1B07_HUMAN	2A5D_HUMAN	2AAA_HUMAN
2ABA_HUMAN	2AAA_HUMAN	2AAA_HUMAN	2ABA_HUMAN
3HIDH_HUMAN	3HIDH_HUMAN	3HIDH_HUMAN	3HIDH_HUMAN
4EBP1_HUMAN	4F2_HUMAN	4F2_HUMAN	4EBP1_HUMAN
4F2_HUMAN	68MP_HUMAN	5NTD_HUMAN	4F2_HUMAN
5NTD_HUMAN	6PGD_HUMAN	68MP_HUMAN	5NTC_HUMAN
68MP_HUMAN	A16A1_HUMAN	6PGD_HUMAN	5NTD_HUMAN
6PGD_HUMAN	A20A4_HUMAN	8ODP_HUMAN	68MP_HUMAN
A16A1_HUMAN	AAAT_HUMAN	A16A1_HUMAN	6PGD_HUMAN
AAAT_HUMAN	AAKG1_HUMAN	AAKG1_HUMAN	6PGL_HUMAN
AAKG1_HUMAN	AAKG2_HUMAN	AAKG2_HUMAN	8ODP_HUMAN
AAPK1_HUMAN	AAPK1_HUMAN	AAPK1_HUMAN	A16A1_HUMAN
AASS_HUMAN	AASS_HUMAN	AATM_HUMAN	AAKG1_HUMAN
AATC_HUMAN	AATC_HUMAN	ABCB5_HUMAN	AAKG2_HUMAN
AATM_HUMAN	AATF_HUMAN	ABCB7_HUMAN	AAMP_HUMAN
ABCB7_HUMAN	AATM_HUMAN	ABCC9_HUMAN	AAPK1_HUMAN
ABCD3_HUMAN	ABC3C_HUMAN	ABCE1_HUMAN	AATM_HUMAN
ABCE1_HUMAN	ABCB5_HUMAN	ABCF1_HUMAN	ABC3C_HUMAN
ABCF1_HUMAN	ABCB6_HUMAN	ABCF2_HUMAN	ABCA1_HUMAN
ABCF2_HUMAN	ABCB7_HUMAN	ABCF3_HUMAN	ABCB5_HUMAN
ABCF3_HUMAN	ABCE1_HUMAN	ABI2_HUMAN	ABCB6_HUMAN
ABL2_HUMAN	ABCF1_HUMAN	ACACA_HUMAN	ABCB7_HUMAN
ACACA_HUMAN	ABCF2_HUMAN	ACAD9_HUMAN	ABCD4_HUMAN
ACAD9_HUMAN	ABI2_HUMAN	ACADV_HUMAN	ABCE1_HUMAN
ACADV_HUMAN	ACACA_HUMAN	ACBP_HUMAN	ABCF1_HUMAN
ACBD6_HUMAN	ACAD9_HUMAN	ACD11_HUMAN	ABCF2_HUMAN
ACBD7_HUMAN	ACADM_HUMAN	ACINU_HUMAN	ABCF3_HUMAN
ACBP_HUMAN	ACADS_HUMAN	ACLY_HUMAN	ABI1_HUMAN
ACD11_HUMAN	ACADV_HUMAN	ACO13_HUMAN	ABL2_HUMAN
ACINU_HUMAN	ACBD7_HUMAN	ACON_HUMAN	ACACA_HUMAN
ACL6A_HUMAN	ACBP_HUMAN	ACSL3_HUMAN	ACAD9_HUMAN
ACLY_HUMAN	ACD11_HUMAN	ACSL4_HUMAN	ACADV_HUMAN
ACOC_HUMAN	ACINU_HUMAN	ACTBL_HUMAN	ACBD7_HUMAN
ACON_HUMAN	ACLY_HUMAN	ACTC_HUMAN	ACBP_HUMAN
ACOT9_HUMAN	ACO13_HUMAN	ACTG_HUMAN	ACD11_HUMAN
ACSF3_HUMAN	ACON_HUMAN	ACTN1_HUMAN	ACINU_HUMAN
ACSL3_HUMAN	ACOT9_HUMAN	ACTN4_HUMAN	ACLY_HUMAN
ACTC_HUMAN	ACPM_HUMAN	ACTZ_HUMAN	ACON_HUMAN
ACTG_HUMAN	ACSL3_HUMAN	ACVR1_HUMAN	ACOT9_HUMAN
ACTN1_HUMAN	ACSL4_HUMAN	ACYP1_HUMAN	ACSL3_HUMAN
ACTN4_HUMAN	ACTBL_HUMAN	ADCYA_HUMAN	ACSL4_HUMAN
ACTZ_HUMAN	ACTC_HUMAN	ADHX_HUMAN	ACTC_HUMAN
ACVR1_HUMAN	ACTG_HUMAN	ADRM1_HUMAN	ACTG_HUMAN
ACYP1_HUMAN	ACTN1_HUMAN	ADT1_HUMAN	ACTH_HUMAN
ADAS_HUMAN	ACTN3_HUMAN	ADT2_HUMAN	ACTN1_HUMAN
ADHX_HUMAN	ACTN4_HUMAN	ADT3_HUMAN	ACTN4_HUMAN
ADRM1_HUMAN	ACTY_HUMAN	AFAP1_HUMAN	ACTY_HUMAN
ADT1_HUMAN	ACTZ_HUMAN	AGFG1_HUMAN	ACTZ_HUMAN
ADT2_HUMAN	ACVR1_HUMAN	AGK_HUMAN	ADAS_HUMAN
ADT3_HUMAN	ADAS_HUMAN	AHNK_HUMAN	ADDA_HUMAN
AFF4_HUMAN	ADDA_HUMAN	AHSA1_HUMAN	ADHX_HUMAN
AFG32_HUMAN	ADDG_HUMAN	AIMP1_HUMAN	ADK_HUMAN
AGAP3_HUMAN	ADHX_HUMAN	AKA12_HUMAN	ADRM1_HUMAN
AGK_HUMAN	ADPGK_HUMAN	AKAP9_HUMAN	ADT1_HUMAN
AHNK_HUMAN	ADRM1_HUMAN	AKP8L_HUMAN	ADT2_HUMAN
AHSA1_HUMAN	ADRO_HUMAN	AL1A3_HUMAN	ADT3_HUMAN
AIFM1_HUMAN	ADT1_HUMAN	AL1B1_HUMAN	AFG32_HUMAN
AIMP1_HUMAN	ADT2_HUMAN	AL3B1_HUMAN	AGFG1_HUMAN
AIMP2_HUMAN	ADT3_HUMAN	AL9A1_HUMAN	AGK_HUMAN
AIP_HUMAN	AFF4_HUMAN	ALDOA_HUMAN	AGM1_HUMAN
AIPL1_HUMAN	AFG32_HUMAN	ALDR_HUMAN	AHNK_HUMAN
AKIP_HUMAN	AGK_HUMAN	ALG5_HUMAN	AHSA1_HUMAN
AKT1_HUMAN	AGO2_HUMAN	AMPD3_HUMAN	AIFM1_HUMAN
AL1A3_HUMAN	AHNK_HUMAN	AMPH_HUMAN	AIMP1_HUMAN
AL1B1_HUMAN	AHSA1_HUMAN	AMPN_HUMAN	AIMP2_HUMAN
AL1L2_HUMAN	AIF1L_HUMAN	AMRP_HUMAN	AIP_HUMAN
AL3B1_HUMAN	AIFM1_HUMAN	AN32A_HUMAN	AKA12_HUMAN
AL7A1_HUMAN	AIMP1_HUMAN	AN32B_HUMAN	AKA7G_HUMAN
AL9A1_HUMAN	AIMP2_HUMAN	AN32E_HUMAN	AKAP2_HUMAN
ALDH2_HUMAN	AK1A1_HUMAN	ANK2_HUMAN	AKT1_HUMAN
ALDOA_HUMAN	AKA12_HUMAN	ANM1_HUMAN	AKT3_HUMAN
ALDR_HUMAN	AKAP9_HUMAN	ANPRB_HUMAN	AL1A3_HUMAN
ALG5_HUMAN	AKIP_HUMAN	ANX11_HUMAN	AL1B1_HUMAN
AMPB_HUMAN	AKT1_HUMAN	ANXA1_HUMAN	AL1L2_HUMAN
AMPD2_HUMAN	AL1A3_HUMAN	ANXA2_HUMAN	AL3B1_HUMAN
AMPL_HUMAN	AL1B1_HUMAN	ANXA4_HUMAN	AL7A1_HUMAN
AMPN_HUMAN	AL4A1_HUMAN	ANXA5_HUMAN	AL9A1_HUMAN
AMRP_HUMAN	AL7A1_HUMAN	ANXA6_HUMAN	ALDOA_HUMAN
AN32A_HUMAN	AL9A1_HUMAN	AP1M1_HUMAN	ALDR_HUMAN
AN32B_HUMAN	ALDOA_HUMAN	AP2A1_HUMAN	ALG5_HUMAN
AN32E_HUMAN	ALDOC_HUMAN	AP2B1_HUMAN	AMPB_HUMAN
ANGE2_HUMAN	ALDR_HUMAN	AP2M1_HUMAN	AMPD2_HUMAN
ANKK1_HUMAN	ALG5_HUMAN	AP3B1_HUMAN	AMPH_HUMAN
ANM1_HUMAN	AMPB_HUMAN	APEX1_HUMAN	AMRP_HUMAN
ANPRB_HUMAN	AMPD2_HUMAN	API5_HUMAN	AMYP_HUMAN
ANR19_HUMAN	AMPL_HUMAN	APOD_HUMAN	AN32A_HUMAN
ANX11_HUMAN	AMRP_HUMAN	APT_HUMAN	AN32B_HUMAN
ANXA1_HUMAN	AN32A_HUMAN	AR6P1_HUMAN	AN32E_HUMAN
ANXA2_HUMAN	AN32B_HUMAN	ARC1B_HUMAN	ANLN_HUMAN
ANXA5_HUMAN	AN32E_HUMAN	AREG_HUMAN	ANM1_HUMAN
ANXA6_HUMAN	ANM1_HUMAN	ARF3_HUMAN	ANXA1_HUMAN
ANXA7_HUMAN	ANX11_HUMAN	ARHG2_HUMAN	ANXA2_HUMAN
AP1G1_HUMAN	ANXA1_HUMAN	ARL1_HUMAN	ANXA4_HUMAN
AP1M1_HUMAN	ANXA2_HUMAN	ARP2_HUMAN	ANXA5_HUMAN
AP2A1_HUMAN	ANXA4_HUMAN	ARP3_HUMAN	ANXA6_HUMAN
AP2B1_HUMAN	ANXA5_HUMAN	ARP5L_HUMAN	ANXA7_HUMAN
AP2M1_HUMAN	ANXA6_HUMAN	ARPC2_HUMAN	AOFA_HUMAN
APEX1_HUMAN	AOFA_HUMAN	ARPC3_HUMAN	AP1G1_HUMAN
API5_HUMAN	AP1B1_HUMAN	ARPC4_HUMAN	AP1M1_HUMAN
APMAP_HUMAN	AP1G1_HUMAN	ARPC5_HUMAN	AP2A1_HUMAN
APOH_HUMAN	AP1M1_HUMAN	ASB2_HUMAN	AP2A2_HUMAN
APT_HUMAN	AP2A1_HUMAN	ASNA_HUMAN	AP2B1_HUMAN
AQR_HUMAN	AP2M1_HUMAN	ASNS_HUMAN	AP2M1_HUMAN
AR6P1_HUMAN	APEX1_HUMAN	ASPH_HUMAN	AP2S1_HUMAN
ARC1B_HUMAN	API5_HUMAN	AT1A1_HUMAN	AP3B1_HUMAN
ARF3_HUMAN	APMAP_HUMAN	AT1B3_HUMAN	APEX1_HUMAN
ARGL1_HUMAN	APOE_HUMAN	AT2A2_HUMAN	API5_HUMAN
ARHG1_HUMAN	APOH_HUMAN	AT2B4_HUMAN	APMAP_HUMAN
ARHG2_HUMAN	APT_HUMAN	AT5F1_HUMAN	APT_HUMAN
ARL11_HUMAN	AR6P1_HUMAN	ATG7_HUMAN	AQR_HUMAN
ARL8A_HUMAN	ARAP1_HUMAN	ATIF1_HUMAN	AR6P1_HUMAN
ARP2_HUMAN	ARC1B_HUMAN	ATLA2_HUMAN	ARC1B_HUMAN
ARP3_HUMAN	ARF3_HUMAN	ATLA3_HUMAN	ARF3_HUMAN
ARP5L_HUMAN	ARF4_HUMAN	ATOX1_HUMAN	ARF4_HUMAN
ARPC2_HUMAN	ARF6_HUMAN	ATP5E_HUMAN	ARFG1_HUMAN
ARPC3_HUMAN	ARHG2_HUMAN	ATP5H_HUMAN	ARH38_HUMAN
ARPC4_HUMAN	ARK72_HUMAN	ATP5I_HUMAN	ARHG1_HUMAN
ARPC5_HUMAN	ARL1_HUMAN	ATP5J_HUMAN	ARL1_HUMAN
ARRB1_HUMAN	ARL8A_HUMAN	ATP5L_HUMAN	ARL3_HUMAN
ASNA_HUMAN	ARP19_HUMAN	ATP6_HUMAN	ARL8A_HUMAN
ASNS_HUMAN	ARP2_HUMAN	ATP8_HUMAN	ARP19_HUMAN
ASPC1_HUMAN	ARP3_HUMAN	ATPA_HUMAN	ARP2_HUMAN
ASPG_HUMAN	ARP5L_HUMAN	ATPB_HUMAN	ARP3_HUMAN
ASPH_HUMAN	ARPC2_HUMAN	ATPD_HUMAN	ARP5L_HUMAN
AT131_HUMAN	ARPC3_HUMAN	ATPG_HUMAN	ARPC2_HUMAN
AT1A1_HUMAN	ARPC4_HUMAN	ATPK_HUMAN	ARPC3_HUMAN
AT1B3_HUMAN	ARPC5_HUMAN	ATPO_HUMAN	ARPC4_HUMAN
AT2A2_HUMAN	ARRB1_HUMAN	ATR_HUMAN	ARPC5_HUMAN
AT5F1_HUMAN	ASAH1_HUMAN	ATRX_HUMAN	ARRB1_HUMAN
ATAD1_HUMAN	ASML_HUMAN	ATX10_HUMAN	ASAH1_HUMAN
ATAD2_HUMAN	ASNA_HUMAN	AURKA_HUMAN	ASNA_HUMAN
ATD3A_HUMAN	ASPC1_HUMAN	B2MG_HUMAN	ASNS_HUMAN
ATD3B_HUMAN	ASPH_HUMAN	BACH_HUMAN	ASPH_HUMAN
ATIF1_HUMAN	AT1A1_HUMAN	BAF_HUMAN	AT131_HUMAN
ATLA3_HUMAN	AT1B1_HUMAN	BAG2_HUMAN	AT1A1_HUMAN
ATP5E_HUMAN	AT1B3_HUMAN	BAHC1_HUMAN	AT1B1_HUMAN
ATP5H_HUMAN	AT2A1_HUMAN	BAP31_HUMAN	AT1B3_HUMAN
ATP5I_HUMAN	AT2A2_HUMAN	BASI_HUMAN	AT2A2_HUMAN
ATP5J_HUMAN	AT2B4_HUMAN	BAZ1B_HUMAN	AT2B4_HUMAN
ATP5L_HUMAN	AT5F1_HUMAN	BCLF1_HUMAN	AT5F1_HUMAN
ATP6_HUMAN	ATAD2_HUMAN	BIEA_HUMAN	ATAD1_HUMAN
ATP8_HUMAN	ATD3A_HUMAN	BLVRB_HUMAN	ATAD2_HUMAN
ATPA_HUMAN	ATD3B_HUMAN	BRAF_HUMAN	ATD3A_HUMAN
ATPB_HUMAN	ATF1_HUMAN	BROX_HUMAN	ATD3B_HUMAN
ATPG_HUMAN	ATG7_HUMAN	BRX1_HUMAN	ATLA3_HUMAN
ATPK_HUMAN	ATIF1_HUMAN	BT3L4_HUMAN	ATOX1_HUMAN
ATPO_HUMAN	ATLA3_HUMAN	BTF3_HUMAN	ATP5E_HUMAN
ATR_HUMAN	ATP5E_HUMAN	BUB1_HUMAN	ATP5H_HUMAN
ATX2L_HUMAN	ATP5H_HUMAN	BUB3_HUMAN	ATP5I_HUMAN
AUHM_HUMAN	ATP5I_HUMAN	BUD31_HUMAN	ATP5J_HUMAN
AURKA_HUMAN	ATP5J_HUMAN	BZW1_HUMAN	ATP5L_HUMAN
B2MG_HUMAN	ATP5L_HUMAN	C1QBP_HUMAN	ATP6_HUMAN
B3GN1_HUMAN	ATP6_HUMAN	C1TC_HUMAN	ATP8_HUMAN
BACH_HUMAN	ATP8_HUMAN	C8AP2_HUMAN	ATPA_HUMAN
BAF_HUMAN	ATPA_HUMAN	CAB45_HUMAN	ATPB_HUMAN
BAP31_HUMAN	ATPB_HUMAN	CACP_HUMAN	ATPD_HUMAN
BARD1_HUMAN	ATPD_HUMAN	CALD1_HUMAN	ATPG_HUMAN
BASI_HUMAN	ATPG_HUMAN	CALM_HUMAN	ATPK_HUMAN
BCAT2_HUMAN	ATPK_HUMAN	CALR_HUMAN	ATPO_HUMAN
BCKD_HUMAN	ATPO_HUMAN	CALU_HUMAN	ATR_HUMAN
BCLF1_HUMAN	ATX10_HUMAN	CALX_HUMAN	AURKA_HUMAN
BDH2_HUMAN	AUHM_HUMAN	CAN2_HUMAN	AXIN1_HUMAN
BGAL_HUMAN	AURKA_HUMAN	CAND1_HUMAN	B2MG_HUMAN
BMS1_HUMAN	B2MG_HUMAN	CAP1_HUMAN	B3GA3_HUMAN
BRAF_HUMAN	B3GLT_HUMAN	CAPR1_HUMAN	BACH_HUMAN
BRD3_HUMAN	B3GN1_HUMAN	CAPZB_HUMAN	BAF_HUMAN
BRD4_HUMAN	BACH_HUMAN	CATA_HUMAN	BAG3_HUMAN
BROX_HUMAN	BAF_HUMAN	CATB_HUMAN	BAP18_HUMAN
BRX1_HUMAN	BAG2_HUMAN	CATD_HUMAN	BAP29_HUMAN
BT3L4_HUMAN	BAP29_HUMAN	CATZ_HUMAN	BAP31_HUMAN
BTF3_HUMAN	BAP31_HUMAN	CAV1_HUMAN	BARD1_HUMAN
BUB3_HUMAN	BASI_HUMAN	CAZA1_HUMAN	BASI_HUMAN
BUD31_HUMAN	BASP1_HUMAN	CBR1_HUMAN	BAX_HUMAN
BZW1_HUMAN	BAZ1A_HUMAN	CBX3_HUMAN	BAZ1A_HUMAN
C1QBP_HUMAN	BAZ1B_HUMAN	CCAR2_HUMAN	BAZ1B_HUMAN
C1TC_HUMAN	BCAT2_HUMAN	CCD27_HUMAN	BCAT2_HUMAN
CAB45_HUMAN	BCKD_HUMAN	CCD38_HUMAN	BCKD_HUMAN
CACP_HUMAN	BCLF1_HUMAN	CCD47_HUMAN	BCLF1_HUMAN
CAD13_HUMAN	BD1L1_HUMAN	CCD58_HUMAN	BGAL_HUMAN
CALI_HUMAN	BLVRB_HUMAN	CD109_HUMAN	BIEA_HUMAN
CALM_HUMAN	BOP1_HUMAN	CD11B_HUMAN	BLVRB_HUMAN
CALR_HUMAN	BPHL_HUMAN	CD123_HUMAN	BMPR2_HUMAN
CALU_HUMAN	BRD4_HUMAN	CD151_HUMAN	BOLA2_HUMAN
CALX_HUMAN	BRX1_HUMAN	CD44_HUMAN	BRAF_HUMAN
CAMP2_HUMAN	BT3L4_HUMAN	CD59_HUMAN	BRX1_HUMAN
CAN1_HUMAN	BTF3_HUMAN	CD9_HUMAN	BTF3_HUMAN
CAN2_HUMAN	BUB3_HUMAN	CDC37_HUMAN	BUB3_HUMAN
CAND1_HUMAN	BUD31_HUMAN	CDC42_HUMAN	BUD31_HUMAN
CAP1_HUMAN	BZW1_HUMAN	CDK1_HUMAN	BYST_HUMAN
CAPG_HUMAN	C1QBP_HUMAN	CDK14_HUMAN	BZW1_HUMAN
CAPR1_HUMAN	C1TC_HUMAN	CDK19_HUMAN	BZW2_HUMAN
CAPZB_HUMAN	CA123_HUMAN	CDK2_HUMAN	C1QBP_HUMAN
CARF_HUMAN	CAB45_HUMAN	CDK5_HUMAN	C1TC_HUMAN
CARM1_HUMAN	CAC1G_HUMAN	CDK7_HUMAN	C1TM_HUMAN
CATA_HUMAN	CACP_HUMAN	CDV3_HUMAN	CA198_HUMAN
CATB_HUMAN	CALD1_HUMAN	CE170_HUMAN	CAB45_HUMAN
CATC_HUMAN	CALM_HUMAN	CELF1_HUMAN	CACP_HUMAN
CATD_HUMAN	CALR_HUMAN	CEP95_HUMAN	CADM4_HUMAN
CAV1_HUMAN	CALU_HUMAN	CH10_HUMAN	CAF1A_HUMAN
CAZA1_HUMAN	CALX_HUMAN	CH60_HUMAN	CALD1_HUMAN
CAZA2_HUMAN	CAN1_HUMAN	CHCH2_HUMAN	CALM_HUMAN
CBR1_HUMAN	CAND1_HUMAN	CHCH3_HUMAN	CALR_HUMAN
CBX3_HUMAN	CAP1_HUMAN	CHD4_HUMAN	CALU_HUMAN
CC112_HUMAN	CAPG_HUMAN	CHERP_HUMAN	CALX_HUMAN
CC124_HUMAN	CAPR1_HUMAN	CHK1_HUMAN	CAN1_HUMAN
CC148_HUMAN	CAPZB_HUMAN	CHK2_HUMAN	CAN2_HUMAN
CC181_HUMAN	CATA_HUMAN	CHM4B_HUMAN	CAND1_HUMAN
CCAR1_HUMAN	CATB_HUMAN	CHMP5_HUMAN	CAP1_HUMAN
CCAR2_HUMAN	CATD_HUMAN	CHSP1_HUMAN	CAP2_HUMAN
CCD27_HUMAN	CAZA1_HUMAN	CIRBP_HUMAN	CAPR1_HUMAN
CCD47_HUMAN	CAZA2_HUMAN	CISD1_HUMAN	CAPZB_HUMAN
CCD58_HUMAN	CB080_HUMAN	CISD2_HUMAN	CARM1_HUMAN
CCDC6_HUMAN	CBPD_HUMAN	CISY_HUMAN	CASP_HUMAN
CCHL_HUMAN	CBR1_HUMAN	CK074_HUMAN	CASP3_HUMAN
CD11B_HUMAN	CBX1_HUMAN	CKAP4_HUMAN	CATA_HUMAN
CD123_HUMAN	CBX3_HUMAN	CKS1_HUMAN	CATB_HUMAN
CD44_HUMAN	CBX5_HUMAN	CLAP1_HUMAN	CATC_HUMAN
CD59_HUMAN	CC134_HUMAN	CLCA_HUMAN	CATD_HUMAN
CD9_HUMAN	CCAR1_HUMAN	CLCB_HUMAN	CATZ_HUMAN
CDC37_HUMAN	CCAR2_HUMAN	CLCN3_HUMAN	CAV1_HUMAN
CDC42_HUMAN	CCD58_HUMAN	CLH1_HUMAN	CAZA1_HUMAN
CDK1_HUMAN	CD109_HUMAN	CLIC1_HUMAN	CAZA2_HUMAN
CDK14_HUMAN	CD11B_HUMAN	CLIC4_HUMAN	CB080_HUMAN
CDK2_HUMAN	CD44_HUMAN	CLIP2_HUMAN	CB39L_HUMAN
CDK5_HUMAN	CD59_HUMAN	CLPP_HUMAN	CBR1_HUMAN
CDK6_HUMAN	CD63_HUMAN	CMC1_HUMAN	CBX1_HUMAN
CDK7_HUMAN	CD99_HUMAN	CN166_HUMAN	CBX3_HUMAN
CDK9_HUMAN	CDC42_HUMAN	CN37_HUMAN	CBX5_HUMAN
CDNF_HUMAN	CDC5L_HUMAN	CNBP_HUMAN	CC124_HUMAN
CDRT1_HUMAN	CDK12_HUMAN	CNN2_HUMAN	CCAR1_HUMAN
CDV3_HUMAN	CDK14_HUMAN	CNN3_HUMAN	CCAR2_HUMAN
CE170_HUMAN	CDK2_HUMAN	CNPY2_HUMAN	CCD58_HUMAN
CECR5_HUMAN	CDK5_HUMAN	CNRP1_HUMAN	CCD93_HUMAN
CELF1_HUMAN	CDK7_HUMAN	CNTP1_HUMAN	CD109_HUMAN
CETN2_HUMAN	CDV3_HUMAN	CO6A1_HUMAN	CD11B_HUMAN
CH10_HUMAN	CECR5_HUMAN	COF1_HUMAN	CD123_HUMAN
CH60_HUMAN	CELF2_HUMAN	COF2_HUMAN	CD151_HUMAN
CHCH2_HUMAN	CEMIP_HUMAN	COPA_HUMAN	CD158_HUMAN
CHCH3_HUMAN	CGBP1_HUMAN	COPB_HUMAN	CD166_HUMAN
CHD4_HUMAN	CH10_HUMAN	COPB2_HUMAN	CD44_HUMAN
CHK1_HUMAN	CH60_HUMAN	COPD_HUMAN	CD59_HUMAN
CHK2_HUMAN	CHAP1_HUMAN	COPE_HUMAN	CD81_HUMAN
CHM1B_HUMAN	CHCH2_HUMAN	COPG1_HUMAN	CD9_HUMAN
CHM2A_HUMAN	CHCH3_HUMAN	COR1C_HUMAN	CD99_HUMAN
CHM2B_HUMAN	CHD2_HUMAN	COTL1_HUMAN	CDC37_HUMAN
CHM4B_HUMAN	CHD3_HUMAN	COX41_HUMAN	CDC42_HUMAN
CHMP5_HUMAN	CHD4_HUMAN	COX5A_HUMAN	CDC5L_HUMAN
CHRD1_HUMAN	CHERP_HUMAN	COX5B_HUMAN	CDC73_HUMAN
CHSP1_HUMAN	CHID1_HUMAN	COX6C_HUMAN	CDK1_HUMAN
CHTOP_HUMAN	CHK2_HUMAN	COX7B_HUMAN	CDK14_HUMAN
CIRBP_HUMAN	CHM1B_HUMAN	CPNE1_HUMAN	CDK2_HUMAN
CISD1_HUMAN	CHM4B_HUMAN	CPNE3_HUMAN	CDK20_HUMAN
CISD2_HUMAN	CHMP6_HUMAN	CPNS1_HUMAN	CDK5_HUMAN
CISY_HUMAN	CHSP1_HUMAN	CPSF5_HUMAN	CDK7_HUMAN
CJ115_HUMAN	CHTOP_HUMAN	CPSF7_HUMAN	CDV3_HUMAN
CKAP4_HUMAN	CISD1_HUMAN	CREB1_HUMAN	CE170_HUMAN
CKAP5_HUMAN	CISD2_HUMAN	CRIP2_HUMAN	CELF1_HUMAN
CL029_HUMAN	CISY_HUMAN	CS010_HUMAN	CETN2_HUMAN
CLCA_HUMAN	CJ011_HUMAN	CS043_HUMAN	CG050_HUMAN
CLCB_HUMAN	CJ115_HUMAN	CS057_HUMAN	CG073_HUMAN
CLCN3_HUMAN	CK070_HUMAN	CSDE1_HUMAN	CGT_HUMAN
CLGN_HUMAN	CKAP4_HUMAN	CSK_HUMAN	CH10_HUMAN
CLH1_HUMAN	CKAP5_HUMAN	CSK21_HUMAN	CH60_HUMAN
CLIC1_HUMAN	CLCN3_HUMAN	CSK22_HUMAN	CHCH2_HUMAN
CLIC4_HUMAN	CLCN5_HUMAN	CSN2_HUMAN	CHCH3_HUMAN
CLPB_HUMAN	CLCN7_HUMAN	CSPG4_HUMAN	CHD4_HUMAN
CLPX_HUMAN	CLH1_HUMAN	CSRP1_HUMAN	CHERP_HUMAN
CMBL_HUMAN	CLIC1_HUMAN	CSRP2_HUMAN	CHIP_HUMAN
CMS1_HUMAN	CLIC4_HUMAN	CSTF2_HUMAN	CHK1_HUMAN
CN166_HUMAN	CLIP2_HUMAN	CTBP2_HUMAN	CHM1A_HUMAN
CN37_HUMAN	CLPB_HUMAN	CUL3_HUMAN	CHM2A_HUMAN
CNBP_HUMAN	CLPP_HUMAN	CUL4A_HUMAN	CHM2B_HUMAN
CNN2_HUMAN	CMC2_HUMAN	CUL4B_HUMAN	CHM4B_HUMAN
CNN3_HUMAN	CMS1_HUMAN	CY1_HUMAN	CHRD1_HUMAN
CNPY2_HUMAN	CN166_HUMAN	CYB_HUMAN	CHSP1_HUMAN
CO026_HUMAN	CN37_HUMAN	CYB5B_HUMAN	CHTOP_HUMAN
COASY_HUMAN	CNBP_HUMAN	CYBP_HUMAN	CI041_HUMAN
COF1_HUMAN	CNDD3_HUMAN	CYC_HUMAN	CIRBP_HUMAN
COF2_HUMAN	CNDP2_HUMAN	CYFP1_HUMAN	CISD1_HUMAN
COMT_HUMAN	CNN2_HUMAN	DAB2_HUMAN	CISD2_HUMAN
COPA_HUMAN	CNN3_HUMAN	DAZP1_HUMAN	CISY_HUMAN
COPB_HUMAN	CNPY2_HUMAN	DBNL_HUMAN	CKAP4_HUMAN
COPB2_HUMAN	CNPY3_HUMAN	DBR1_HUMAN	CKAP5_HUMAN
COPD_HUMAN	CO1A1_HUMAN	DCPS_HUMAN	CKS1_HUMAN
COPE_HUMAN	CO3A1_HUMAN	DCTN2_HUMAN	CLCA_HUMAN
COPG1_HUMAN	CO6A2_HUMAN	DD19B_HUMAN	CLCN3_HUMAN
COPG2_HUMAN	CO6A3_HUMAN	DDB1_HUMAN	CLCN5_HUMAN
COR1B_HUMAN	COASY_HUMAN	DDTL_HUMAN	CLGN_HUMAN
COR1C_HUMAN	COF1_HUMAN	DDX1_HUMAN	CLH1_HUMAN
COTL1_HUMAN	COF2_HUMAN	DDX17_HUMAN	CLIC1_HUMAN
COX41_HUMAN	COMT_HUMAN	DDX18_HUMAN	CLIC4_HUMAN
COX5B_HUMAN	COPA_HUMAN	DDX21_HUMAN	CLIP2_HUMAN
COX6C_HUMAN	COPB_HUMAN	DDX3X_HUMAN	CLPB_HUMAN
COX7B_HUMAN	COPB2_HUMAN	DDX41_HUMAN	CLPT1_HUMAN
COXM1_HUMAN	COPD_HUMAN	DDX46_HUMAN	CMC2_HUMAN
CP21A_HUMAN	COPG1_HUMAN	DDX5_HUMAN	CMPK2_HUMAN
CP250_HUMAN	COPZ1_HUMAN	DDX54_HUMAN	CMS1_HUMAN
CPNS1_HUMAN	COR1B_HUMAN	DDX58_HUMAN	CN166_HUMAN
CPSF4_HUMAN	COR1C_HUMAN	DDX60_HUMAN	CN37_HUMAN
CPSF5_HUMAN	CORO6_HUMAN	DECR_HUMAN	CNBP_HUMAN
CPSF6_HUMAN	COTL1_HUMAN	DEK_HUMAN	CND1_HUMAN
CPSF7_HUMAN	COX2_HUMAN	DESP_HUMAN	CND3_HUMAN
CR021_HUMAN	COX41_HUMAN	DEST_HUMAN	CNDP2_HUMAN
CREB1_HUMAN	COX5A_HUMAN	DHB12_HUMAN	CNN2_HUMAN
CRIP2_HUMAN	COX5B_HUMAN	DHB4_HUMAN	CNN3_HUMAN
CS043_HUMAN	COX6C_HUMAN	DHE3_HUMAN	CNPY2_HUMAN
CSDE1_HUMAN	COX7B_HUMAN	DHX15_HUMAN	CNRP1_HUMAN
CSK_HUMAN	COX7C_HUMAN	DHX9_HUMAN	CNTP1_HUMAN
CSK21_HUMAN	COXM1_HUMAN	DIAC_HUMAN	CO5A3_HUMAN
CSK22_HUMAN	CP131_HUMAN	DIAP1_HUMAN	COF1_HUMAN
CSK2B_HUMAN	CP21A_HUMAN	DJB11_HUMAN	COF2_HUMAN
CSN2_HUMAN	CP250_HUMAN	DJB12_HUMAN	COMT_HUMAN
CSN3_HUMAN	CP27A_HUMAN	DJC11_HUMAN	COPA_HUMAN
CSN6_HUMAN	CP51A_HUMAN	DLDH_HUMAN	COPB_HUMAN
CSPG4_HUMAN	CPNE1_HUMAN	DLRB1_HUMAN	COPB2_HUMAN
CSRP1_HUMAN	CPNE3_HUMAN	DNJA1_HUMAN	COPD_HUMAN
CSTF2_HUMAN	CPSF5_HUMAN	DNJB1_HUMAN	COPG1_HUMAN
CT027_HUMAN	CPSF6_HUMAN	DNJC8_HUMAN	COPG2_HUMAN
CT451_HUMAN	CPSF7_HUMAN	DNLI1_HUMAN	COPZ1_HUMAN
CTBL1_HUMAN	CPT2_HUMAN	DNM1L_HUMAN	COR1B_HUMAN
CTBP2_HUMAN	CRTAP_HUMAN	DOCK5_HUMAN	COR1C_HUMAN
CTNA1_HUMAN	CS010_HUMAN	DOCK8_HUMAN	COTL1_HUMAN
CUL4A_HUMAN	CS043_HUMAN	DPOLZ_HUMAN	COX2_HUMAN
CWC15_HUMAN	CS068_HUMAN	DPYL1_HUMAN	COX41_HUMAN
CX6B1_HUMAN	CSDE1_HUMAN	DPYL2_HUMAN	COX5A_HUMAN
CY1_HUMAN	CSK_HUMAN	DRG1_HUMAN	COX5B_HUMAN
CYB5B_HUMAN	CSK21_HUMAN	DRP2_HUMAN	COX6C_HUMAN
CYBP_HUMAN	CSK22_HUMAN	DSRAD_HUMAN	COX7B_HUMAN
CYC_HUMAN	CSKP_HUMAN	DUS3L_HUMAN	CP080_HUMAN
CYLC2_HUMAN	CSN2_HUMAN	DUT_HUMAN	CP131_HUMAN
CYTB_HUMAN	CSPG4_HUMAN	DX39A_HUMAN	CPIN1_HUMAN
DAB2_HUMAN	CSRP1_HUMAN	DX39B_HUMAN	CPNE1_HUMAN
DAF_HUMAN	CSRP2_HUMAN	DYHC1_HUMAN	CPNE3_HUMAN
DAP1_HUMAN	CSTF2_HUMAN	DYL1_HUMAN	CPNS1_HUMAN
DAZP1_HUMAN	CUL4B_HUMAN	DYN2_HUMAN	CPSF4_HUMAN
DBNL_HUMAN	CWC15_HUMAN	E2AK2_HUMAN	CPSF5_HUMAN
DBR1_HUMAN	CX6B1_HUMAN	E2AK4_HUMAN	CPSF6_HUMAN
DCK_HUMAN	CX7A2_HUMAN	E41L2_HUMAN	CPSF7_HUMAN
DCTD_HUMAN	CY1_HUMAN	EBP2_HUMAN	CREL2_HUMAN
DD19A_HUMAN	CYB5B_HUMAN	ECH1_HUMAN	CRIP2_HUMAN
DDB1_HUMAN	CYBP_HUMAN	ECHA_HUMAN	CRKL_HUMAN
DDB2_HUMAN	CYC_HUMAN	ECHB_HUMAN	CROCC_HUMAN
DDX1_HUMAN	CYGB_HUMAN	ECHM_HUMAN	CRTAP_HUMAN
DDX11_HUMAN	CYTB_HUMAN	ECI2_HUMAN	CRYAB_HUMAN
DDX17_HUMAN	DAB2_HUMAN	EDEM2_HUMAN	CS010_HUMAN
DDX18_HUMAN	DAZP1_HUMAN	EDF1_HUMAN	CS043_HUMAN
DDX21_HUMAN	DBNL_HUMAN	EF1A1_HUMAN	CSDE1_HUMAN
DDX3X_HUMAN	DBR1_HUMAN	EF1A2_HUMAN	CSK_HUMAN
DDX46_HUMAN	DC1L2_HUMAN	EF1B_HUMAN	CSK21_HUMAN
DDX47_HUMAN	DCK_HUMAN	EF1D_HUMAN	CSK22_HUMAN
DDX5_HUMAN	DCTD_HUMAN	EF1G_HUMAN	CSKP_HUMAN
DDX50_HUMAN	DCTN1_HUMAN	EF2_HUMAN	CSN2_HUMAN
DECR_HUMAN	DCXR_HUMAN	EFHD2_HUMAN	CSN8_HUMAN
DEK_HUMAN	DD19B_HUMAN	EFTS_HUMAN	CSPG4_HUMAN
DENR_HUMAN	DDB1_HUMAN	EFTU_HUMAN	CSRP1_HUMAN
DEST_HUMAN	DDTL_HUMAN	EGFR_HUMAN	CSRP2_HUMAN
DGKA_HUMAN	DDX1_HUMAN	EHD1_HUMAN	CSTF2_HUMAN
DHB12_HUMAN	DDX17_HUMAN	EHD2_HUMAN	CT027_HUMAN
DHB4_HUMAN	DDX18_HUMAN	EHD4_HUMAN	CTBP2_HUMAN
DHE3_HUMAN	DDX21_HUMAN	EIF1B_HUMAN	CTGF_HUMAN
DHX15_HUMAN	DDX24_HUMAN	EIF2A_HUMAN	CTNA1_HUMAN
DHX40_HUMAN	DDX42_HUMAN	EIF3A_HUMAN	CTND1_HUMAN
DHX9_HUMAN	DDX46_HUMAN	EIF3B_HUMAN	CTR9_HUMAN
DI3L1_HUMAN	DDX47_HUMAN	EIF3D_HUMAN	CUL1_HUMAN
DIAC_HUMAN	DDX5_HUMAN	EIF3E_HUMAN	CUL3_HUMAN
DIAP1_HUMAN	DDX54_HUMAN	EIF3G_HUMAN	CUL4A_HUMAN
DIP2B_HUMAN	DDX6_HUMAN	EIF3H_HUMAN	CUL4B_HUMAN
DJB11_HUMAN	DECR_HUMAN	EIF3I_HUMAN	CUX1_HUMAN
DJC17_HUMAN	DEK_HUMAN	EIF3J_HUMAN	CWC15_HUMAN
DKC1_HUMAN	DENR_HUMAN	EIF3K_HUMAN	CX6B1_HUMAN
DLDH_HUMAN	DEOC_HUMAN	EIF3L_HUMAN	CX7A2_HUMAN
DNJA1_HUMAN	DEST_HUMAN	EIFCL_HUMAN	CY1_HUMAN
DNJA2_HUMAN	DGKD_HUMAN	ELAV1_HUMAN	CYB5B_HUMAN
DNJA3_HUMAN	DHB11_HUMAN	ELK4_HUMAN	CYBP_HUMAN
DNJB1_HUMAN	DHB12_HUMAN	ELOB_HUMAN	CYC_HUMAN
DNJC2_HUMAN	DHB4_HUMAN	ENAH_HUMAN	CYFP1_HUMAN
DNJC8_HUMAN	DHCR7_HUMAN	ENOA_HUMAN	CYTB_HUMAN
DNLI1_HUMAN	DHE3_HUMAN	ENOG_HUMAN	DAB2_HUMAN
DPM1_HUMAN	DHPR_HUMAN	ENPL_HUMAN	DAG1_HUMAN
DPP9_HUMAN	DHRS4_HUMAN	ENSA_HUMAN	DAZP1_HUMAN
DPY30_HUMAN	DHRS7_HUMAN	EPHA2_HUMAN	DBNL_HUMAN
DPYL2_HUMAN	DHSO_HUMAN	ERF1_HUMAN	DBR1_HUMAN
DRP2_HUMAN	DHX15_HUMAN	ERF3A_HUMAN	DC1L1_HUMAN
DSCAM_HUMAN	DHX36_HUMAN	ERH_HUMAN	DC1L2_HUMAN
DSRAD_HUMAN	DHX9_HUMAN	ERI1_HUMAN	DCK_HUMAN
DTD1_HUMAN	DIAC_HUMAN	ERLN1_HUMAN	DCPS_HUMAN
DUS3L_HUMAN	DIP2B_HUMAN	ERN1_HUMAN	DCTD_HUMAN
DUT_HUMAN	DJB11_HUMAN	ERO1A_HUMAN	DCTN1_HUMAN
DX39A_HUMAN	DJC11_HUMAN	ERP29_HUMAN	DCTN2_HUMAN
DX39B_HUMAN	DJC17_HUMAN	ERP44_HUMAN	DCTN3_HUMAN
DYHC1_HUMAN	DKC1_HUMAN	ESTD_HUMAN	DCXR_HUMAN
DYHC2_HUMAN	DLDH_HUMAN	ESYT1_HUMAN	DD19B_HUMAN
DYL1_HUMAN	DLG5_HUMAN	ESYT2_HUMAN	DDB1_HUMAN
DYN2_HUMAN	DLRB1_HUMAN	ETFA_HUMAN	DDTL_HUMAN
DYST_HUMAN	DNJA1_HUMAN	ETFB_HUMAN	DDX1_HUMAN
E2AK2_HUMAN	DNJA2_HUMAN	EWS_HUMAN	DDX17_HUMAN
E2AK4_HUMAN	DNJA3_HUMAN	EZRI_HUMAN	DDX18_HUMAN
E41L2_HUMAN	DNJB1_HUMAN	F10A1_HUMAN	DDX21_HUMAN
EBP2_HUMAN	DNJC8_HUMAN	F111A_HUMAN	DDX24_HUMAN
ECH1_HUMAN	DNM1L_HUMAN	F162A_HUMAN	DDX3X_HUMAN
ECHA_HUMAN	DOCK2_HUMAN	F193A_HUMAN	DDX42_HUMAN
ECHB_HUMAN	DPM1_HUMAN	FA50A_HUMAN	DDX46_HUMAN
ECHM_HUMAN	DPOG1_HUMAN	FA65A_HUMAN	DDX5_HUMAN
ECI1_HUMAN	DPOLZ_HUMAN	FABP5_HUMAN	DDX50_HUMAN
ECI2_HUMAN	DPP2_HUMAN	FACE1_HUMAN	DDX56_HUMAN
EDF1_HUMAN	DPY30_HUMAN	FAF2_HUMAN	DDX6_HUMAN
EEA1_HUMAN	DPYL2_HUMAN	FAHD1_HUMAN	DECR_HUMAN
EF1A1_HUMAN	DREB_HUMAN	FAK1_HUMAN	DEK_HUMAN
EF1A2_HUMAN	DSRAD_HUMAN	FAM3C_HUMAN	DESM_HUMAN
EF1B_HUMAN	DUS3L_HUMAN	FAS_HUMAN	DEST_HUMAN
EF1D_HUMAN	DUT_HUMAN	FBRL_HUMAN	DHB11_HUMAN
EF1G_HUMAN	DX39A_HUMAN	FCL_HUMAN	DHB12_HUMAN
EF2_HUMAN	DX39B_HUMAN	FCRLA_HUMAN	DHE3_HUMAN
EF2K_HUMAN	DYHC1_HUMAN	FEN1_HUMAN	DHE4_HUMAN
EFTS_HUMAN	DYL1_HUMAN	FER_HUMAN	DHSO_HUMAN
EFTU_HUMAN	DYN2_HUMAN	FGF2_HUMAN	DHX15_HUMAN
EGFR_HUMAN	E2AK2_HUMAN	FHL2_HUMAN	DHX30_HUMAN
EHD2_HUMAN	E41L2_HUMAN	FINC_HUMAN	DHX37_HUMAN
EHD4_HUMAN	E41L3_HUMAN	FKB10_HUMAN	DHX8_HUMAN
EI2BE_HUMAN	EBP2_HUMAN	FKB11_HUMAN	DHX9_HUMAN
EIF1B_HUMAN	ECH1_HUMAN	FKBP2_HUMAN	DJB11_HUMAN
EIF2A_HUMAN	ECHA_HUMAN	FKBP3_HUMAN	DJC17_HUMAN
EIF2D_HUMAN	ECHB_HUMAN	FKBP4_HUMAN	DKC1_HUMAN
EIF3A_HUMAN	ECHD1_HUMAN	FKBP5_HUMAN	DLDH_HUMAN
EIF3B_HUMAN	ECHM_HUMAN	FKBP8_HUMAN	DLG5_HUMAN
EIF3D_HUMAN	ECI1_HUMAN	FLNA_HUMAN	DLGP4_HUMAN
EIF3E_HUMAN	ECI2_HUMAN	FLNB_HUMAN	DLRB1_HUMAN
EIF3G_HUMAN	EDF1_HUMAN	FOSB_HUMAN	DMP4_HUMAN
EIF3H_HUMAN	EDIL3_HUMAN	FOXK1_HUMAN	DNJA1_HUMAN
EIF3I_HUMAN	EF1A1_HUMAN	FPPS_HUMAN	DNJA2_HUMAN
EIF3J_HUMAN	EF1A2_HUMAN	FSCN1_HUMAN	DNJA4_HUMAN
EIF3L_HUMAN	EF1B_HUMAN	FUBP1_HUMAN	DNJB1_HUMAN
EIF3M_HUMAN	EF1D_HUMAN	FUBP2_HUMAN	DNJB6_HUMAN
EIFCL_HUMAN	EF1G_HUMAN	FUBP3_HUMAN	DNJC2_HUMAN
ELAV1_HUMAN	EF2_HUMAN	FUMH_HUMAN	DNJC3_HUMAN
ELOB_HUMAN	EFGM_HUMAN	FUS_HUMAN	DNJC8_HUMAN
EMAL3_HUMAN	EFTS_HUMAN	FXR1_HUMAN	DNLI1_HUMAN
EMD_HUMAN	EFTU_HUMAN	FYV1_HUMAN	DNM1L_HUMAN
ENOA_HUMAN	EGFR_HUMAN	G3BP1_HUMAN	DPM1_HUMAN
ENOG_HUMAN	EHD2_HUMAN	G3BP2_HUMAN	DPOLZ_HUMAN
ENPL_HUMAN	EI2BE_HUMAN	G3P_HUMAN	DPYL1_HUMAN
ENSA_HUMAN	EIF1B_HUMAN	G6PD_HUMAN	DPYL2_HUMAN
ENTP5_HUMAN	EIF2A_HUMAN	G6PE_HUMAN	DRA_HUMAN
ENY2_HUMAN	EIF3A_HUMAN	G6PI_HUMAN	DRG2_HUMAN
EPHA2_HUMAN	EIF3B_HUMAN	GALT2_HUMAN	DRP2_HUMAN
ERAP1_HUMAN	EIF3D_HUMAN	GANAB_HUMAN	DSCAM_HUMAN
ERF1_HUMAN	EIF3E_HUMAN	GAS7_HUMAN	DSRAD_HUMAN
ERF3A_HUMAN	EIF3F_HUMAN	GATB_HUMAN	DTX4_HUMAN
ERH_HUMAN	EIF3G_HUMAN	GBB1_HUMAN	DUS2L_HUMAN
ERI1_HUMAN	EIF3H_HUMAN	GBB2_HUMAN	DUS3L_HUMAN
ERLEC_HUMAN	EIF3I_HUMAN	GBG12_HUMAN	DUT_HUMAN
ERLN2_HUMAN	EIF3J_HUMAN	GBG2_HUMAN	DX39A_HUMAN
ERN1_HUMAN	EIF3K_HUMAN	GBG5_HUMAN	DX39B_HUMAN
ERO1A_HUMAN	EIF3L_HUMAN	GBLP_HUMAN	DYHC1_HUMAN
ERO1B_HUMAN	EIF3M_HUMAN	GCN1L_HUMAN	DYL1_HUMAN
ERP29_HUMAN	EIFCL_HUMAN	GCP60_HUMAN	DYM_HUMAN
ERP44_HUMAN	ELAV1_HUMAN	GDIA_HUMAN	DYN2_HUMAN
ES1_HUMAN	ELOA1_HUMAN	GDIB_HUMAN	DYST_HUMAN
ESCO1_HUMAN	ELOB_HUMAN	GDIR1_HUMAN	E2AK2_HUMAN
ESTD_HUMAN	ELOC_HUMAN	GDN_HUMAN	E2AK4_HUMAN
ESYT1_HUMAN	EMD_HUMAN	GELS_HUMAN	E41L2_HUMAN
ESYT2_HUMAN	EMSA1_HUMAN	GFPT1_HUMAN	E41L3_HUMAN
ETFA_HUMAN	ENDD1_HUMAN	GFPT2_HUMAN	EBP2_HUMAN
ETFB_HUMAN	ENOA_HUMAN	GGH_HUMAN	ECH1_HUMAN
EWS_HUMAN	ENOG_HUMAN	GHC1_HUMAN	ECHA_HUMAN
EXOS4_HUMAN	ENPL_HUMAN	GLTL3_HUMAN	ECHB_HUMAN
EXOS9_HUMAN	ENPP1_HUMAN	GLTL5_HUMAN	ECHD1_HUMAN
EZRI_HUMAN	ENSA_HUMAN	GLU2B_HUMAN	ECHM_HUMAN
F10A1_HUMAN	ENTP5_HUMAN	GLYM_HUMAN	ECI1_HUMAN
F136A_HUMAN	EPHA2_HUMAN	GNAI2_HUMAN	ECI2_HUMAN
F162A_HUMAN	EPHA5_HUMAN	GNL3_HUMAN	EDF1_HUMAN
F192A_HUMAN	EPN4_HUMAN	GNS_HUMAN	EEA1_HUMAN
F195B_HUMAN	ERG1_HUMAN	GOGB1_HUMAN	EF1A1_HUMAN
FA21A_HUMAN	ERGI1_HUMAN	GPX8_HUMAN	EF1A2_HUMAN
FA50A_HUMAN	ERH_HUMAN	GRHPR_HUMAN	EF1B_HUMAN
FABP5_HUMAN	ERIP6_HUMAN	GRP75_HUMAN	EF1D_HUMAN
FACE1_HUMAN	ERLN1_HUMAN	GRP78_HUMAN	EF1G_HUMAN
FAF2_HUMAN	ERLN2_HUMAN	GRPE1_HUMAN	EF2_HUMAN
FAK1_HUMAN	ERO1A_HUMAN	GRSF1_HUMAN	EF2K_HUMAN
FAM3C_HUMAN	ERO1B_HUMAN	GSH0_HUMAN	EFTS_HUMAN
FAS_HUMAN	ERP29_HUMAN	GSHB_HUMAN	EFTU_HUMAN
FBRL_HUMAN	ERP44_HUMAN	GSHR_HUMAN	EGFR_HUMAN
FBX41_HUMAN	ES1_HUMAN	GSK3A_HUMAN	EHD1_HUMAN
FCL_HUMAN	ESTD_HUMAN	GSK3B_HUMAN	EHD2_HUMAN
FEN1_HUMAN	ESYT1_HUMAN	GSTO1_HUMAN	EHD4_HUMAN
FER_HUMAN	ESYT2_HUMAN	GSTP1_HUMAN	EI2BA_HUMAN
FIS1_HUMAN	ETFA_HUMAN	GT251_HUMAN	EI2BE_HUMAN
FKB10_HUMAN	ETFB_HUMAN	GTF2I_HUMAN	EIF1_HUMAN
FKB11_HUMAN	EWS_HUMAN	GTR1_HUMAN	EIF1A_HUMAN
FKB1A_HUMAN	EXOS9_HUMAN	GUAA_HUMAN	EIF2A_HUMAN
FKBP2_HUMAN	EZRI_HUMAN	GWL_HUMAN	EIF3A_HUMAN
FKBP3_HUMAN	F10A1_HUMAN	H10_HUMAN	EIF3B_HUMAN
FKBP4_HUMAN	F136A_HUMAN	H11_HUMAN	EIF3D_HUMAN
FKBP5_HUMAN	F162A_HUMAN	H12_HUMAN	EIF3E_HUMAN
FKBP8_HUMAN	F210A_HUMAN	H14_HUMAN	EIF3F_HUMAN
FLNA_HUMAN	F262_HUMAN	H1FOO_HUMAN	EIF3G_HUMAN
FLNB_HUMAN	FA50A_HUMAN	H1X_HUMAN	EIF3H_HUMAN
FLOT1_HUMAN	FA69C_HUMAN	H2A1_HUMAN	EIF3I_HUMAN
FND3A_HUMAN	FA98A_HUMAN	H2A1C_HUMAN	EIF3K_HUMAN
FNTA_HUMAN	FAAA_HUMAN	H2A1D_HUMAN	EIF3L_HUMAN
FOXK1_HUMAN	FABP5_HUMAN	H2A2B_HUMAN	EIF3M_HUMAN
FPPS_HUMAN	FABP7_HUMAN	H2AX_HUMAN	EIFCL_HUMAN
FR1L4_HUMAN	FACE1_HUMAN	H2AY_HUMAN	ELAV1_HUMAN
FSCN1_HUMAN	FADD_HUMAN	H2AZ_HUMAN	ELAV4_HUMAN
FUBP1_HUMAN	FAF2_HUMAN	H2B1B_HUMAN	ELMD2_HUMAN
FUBP2_HUMAN	FAH2B_HUMAN	H2B1D_HUMAN	ELOB_HUMAN
FUBP3_HUMAN	FAHD1_HUMAN	H2B1K_HUMAN	ELOC_HUMAN
FUMH_HUMAN	FAK1_HUMAN	H2B1L_HUMAN	ELOV5_HUMAN
FUND2_HUMAN	FARP1_HUMAN	H2B1M_HUMAN	EMC6_HUMAN
FUS_HUMAN	FAS_HUMAN	H2B1O_HUMAN	EMD_HUMAN
FXR2_HUMAN	FBRL_HUMAN	H31_HUMAN	EMSA1_HUMAN
FYV1_HUMAN	FEN1_HUMAN	H33_HUMAN	ENAH_HUMAN
G3BP1_HUMAN	FERM2_HUMAN	H4_HUMAN	ENDD1_HUMAN
G3BP2_HUMAN	FHIT_HUMAN	H90B4_HUMAN	ENOA_HUMAN
G3P_HUMAN	FHL1_HUMAN	HAP28_HUMAN	ENOG_HUMAN
G6PD_HUMAN	FHL2_HUMAN	HCD2_HUMAN	ENPL_HUMAN
G6PE_HUMAN	FINC_HUMAN	HCDH_HUMAN	ENPP1_HUMAN
G6PI_HUMAN	FIS1_HUMAN	HDGF_HUMAN	ENSA_HUMAN
GALE_HUMAN	FKB10_HUMAN	HDGR2_HUMAN	ENTP5_HUMAN
GALT2_HUMAN	FKB11_HUMAN	HEBP1_HUMAN	ENY2_HUMAN
GANAB_HUMAN	FKB1A_HUMAN	HEMGN_HUMAN	EPN4_HUMAN
GATB_HUMAN	FKBP2_HUMAN	HEXB_HUMAN	ER6L2_HUMAN
GBB1_HUMAN	FKBP3_HUMAN	HIBCH_HUMAN	ERF1_HUMAN
GBG5_HUMAN	FKBP4_HUMAN	HINT1_HUMAN	ERF3A_HUMAN
GBLP_HUMAN	FKBP7_HUMAN	HM13_HUMAN	ERG1_HUMAN
GCN1L_HUMAN	FKBP8_HUMAN	HMGA1_HUMAN	ERGI1_HUMAN
GCP60_HUMAN	FLNA_HUMAN	HMGB1_HUMAN	ERH_HUMAN
GDIA_HUMAN	FLNB_HUMAN	HMGB2_HUMAN	ERI1_HUMAN
GDIB_HUMAN	FLNC_HUMAN	HMGB3_HUMAN	ERI3_HUMAN
GDIR1_HUMAN	FLOT1_HUMAN	HMGN1_HUMAN	ERLN1_HUMAN
GDN_HUMAN	FLOT2_HUMAN	HMGN2_HUMAN	ERLN2_HUMAN
GELS_HUMAN	FMR1_HUMAN	HMOX2_HUMAN	ERP29_HUMAN
GFPT1_HUMAN	FPPS_HUMAN	HN1_HUMAN	ERP44_HUMAN
GHC1_HUMAN	FRMD5_HUMAN	HNRCL_HUMAN	ES1_HUMAN
GLCE_HUMAN	FSCN1_HUMAN	HNRDL_HUMAN	ESYT1_HUMAN
GLGB_HUMAN	FUBP1_HUMAN	HNRH1_HUMAN	ESYT2_HUMAN
GLRX3_HUMAN	FUBP2_HUMAN	HNRH2_HUMAN	ETFA_HUMAN
GLSK_HUMAN	FUBP3_HUMAN	HNRH3_HUMAN	ETFB_HUMAN
GLTL5_HUMAN	FUMH_HUMAN	HNRL1_HUMAN	EWS_HUMAN
GLU2B_HUMAN	FUND2_HUMAN	HNRL2_HUMAN	EXOS2_HUMAN
GLYM_HUMAN	FUS_HUMAN	HNRPC_HUMAN	EXOS8_HUMAN
GNA1_HUMAN	FXR1_HUMAN	HNRPD_HUMAN	EXOS9_HUMAN
GNAI2_HUMAN	FYN_HUMAN	HNRPF_HUMAN	EXOSX_HUMAN
GNAS2_HUMAN	G3BP1_HUMAN	HNRPK_HUMAN	EZRI_HUMAN
GNL3_HUMAN	G3BP2_HUMAN	HNRPL_HUMAN	F10A1_HUMAN
GOGB1_HUMAN	G3P_HUMAN	HNRPM_HUMAN	F120A_HUMAN
GPDM_HUMAN	G3PT_HUMAN	HNRPQ_HUMAN	F136A_HUMAN
GRP75_HUMAN	G45IP_HUMAN	HNRPR_HUMAN	F195B_HUMAN
GRP78_HUMAN	G6PD_HUMAN	HNRPU_HUMAN	FA20A_HUMAN
GRPE1_HUMAN	G6PE_HUMAN	HOME2_HUMAN	FA50A_HUMAN
GSHB_HUMAN	G6PI_HUMAN	HP1B3_HUMAN	FA98A_HUMAN
GSHR_HUMAN	GALE_HUMAN	HPCL1_HUMAN	FABP5_HUMAN
GSK3A_HUMAN	GALK2_HUMAN	HPRT_HUMAN	FABP7_HUMAN
GSK3B_HUMAN	GALM_HUMAN	HS105_HUMAN	FACE1_HUMAN
GSTK1_HUMAN	GALT2_HUMAN	HS90A_HUMAN	FACR1_HUMAN
GSTO1_HUMAN	GANAB_HUMAN	HS90B_HUMAN	FAHD1_HUMAN
GSTP1_HUMAN	GAR1_HUMAN	HSP71_HUMAN	FAK1_HUMAN
GTF2I_HUMAN	GBB1_HUMAN	HSP72_HUMAN	FAM3C_HUMAN
GTR1_HUMAN	GBB2_HUMAN	HSP74_HUMAN	FAS_HUMAN
GUAA_HUMAN	GBG12_HUMAN	HSP7C_HUMAN	FBP1L_HUMAN
GWL_HUMAN	GBG5_HUMAN	HSPB1_HUMAN	FBRL_HUMAN
H10_HUMAN	GBLP_HUMAN	HUWE1_HUMAN	FEN1_HUMAN
H12_HUMAN	GBP1_HUMAN	HXK1_HUMAN	FER_HUMAN
H13_HUMAN	GCDH_HUMAN	HYOU1_HUMAN	FERM2_HUMAN
H14_HUMAN	GCN1L_HUMAN	IBP7_HUMAN	FHIT_HUMAN
H15_HUMAN	GCP60_HUMAN	IBTK_HUMAN	FINC_HUMAN
H1X_HUMAN	GDIA_HUMAN	ICAM1_HUMAN	FIS1_HUMAN
H2A1_HUMAN	GDIB_HUMAN	IDH3A_HUMAN	FKB10_HUMAN
H2A1C_HUMAN	GDIR1_HUMAN	IDHC_HUMAN	FKB11_HUMAN
H2A1D_HUMAN	GDN_HUMAN	IDHP_HUMAN	FKB1A_HUMAN
H2A2C_HUMAN	GELS_HUMAN	IF16_HUMAN	FKBP2_HUMAN
H2AX_HUMAN	GEMI2_HUMAN	IF1AX_HUMAN	FKBP3_HUMAN
H2AY_HUMAN	GGH_HUMAN	IF2A_HUMAN	FKBP4_HUMAN
H2B1B_HUMAN	GKAP1_HUMAN	IF2B_HUMAN	FKBP7_HUMAN
H2B1D_HUMAN	GLGB_HUMAN	IF2B2_HUMAN	FKBP8_HUMAN
H2B1H_HUMAN	GLO2_HUMAN	IF2B3_HUMAN	FKBP9_HUMAN
H2B1J_HUMAN	GLOD4_HUMAN	IF2G_HUMAN	FLNA_HUMAN
H2B1K_HUMAN	GLSK_HUMAN	IF4A1_HUMAN	FLNB_HUMAN
H2B1L_HUMAN	GLTL5_HUMAN	IF4A2_HUMAN	FLNC_HUMAN
H2B1M_HUMAN	GLU2B_HUMAN	IF4A3_HUMAN	FND3A_HUMAN
H31_HUMAN	GLYM_HUMAN	IF4B_HUMAN	FND3B_HUMAN
H4_HUMAN	GMFB_HUMAN	IF4E_HUMAN	FOXK1_HUMAN
H90B2_HUMAN	GNA1_HUMAN	IF4G1_HUMAN	FPPS_HUMAN
HACD3_HUMAN	GNA12_HUMAN	IF4G2_HUMAN	FSCN1_HUMAN
HAP28_HUMAN	GNAI2_HUMAN	IF4G3_HUMAN	FTO_HUMAN
HCD2_HUMAN	GNAI3_HUMAN	IF4H_HUMAN	FUBP1_HUMAN
HCDH_HUMAN	GNAS1_HUMAN	IF5_HUMAN	FUBP2_HUMAN
HCFC1_HUMAN	GNL3_HUMAN	IF5A1_HUMAN	FUBP3_HUMAN
HDAC1_HUMAN	GNS_HUMAN	IKIP_HUMAN	FUMH_HUMAN
HDAC2_HUMAN	GOPC_HUMAN	IKKE_HUMAN	FUS_HUMAN
HDDC2_HUMAN	GORS2_HUMAN	IL1B_HUMAN	FXR1_HUMAN
HDGF_HUMAN	GPC1_HUMAN	IL8_HUMAN	FYN_HUMAN
HDGR2_HUMAN	GPDM_HUMAN	ILF2_HUMAN	FYV1_HUMAN
HDGR3_HUMAN	GPNMB_HUMAN	ILF3_HUMAN	G3BP1_HUMAN
HEBP1_HUMAN	GPX8_HUMAN	ILK_HUMAN	G3BP2_HUMAN
HEM6_HUMAN	GRN_HUMAN	IMA1_HUMAN	G3P_HUMAN
HEMH_HUMAN	GRP75_HUMAN	IMB1_HUMAN	G6PD_HUMAN
HEXB_HUMAN	GRP78_HUMAN	IMDH1_HUMAN	G6PE_HUMAN
HGS_HUMAN	GRPE1_HUMAN	IMDH2_HUMAN	G6PI_HUMAN
HINT1_HUMAN	GSHB_HUMAN	IMMT_HUMAN	GALK1_HUMAN
HM13_HUMAN	GSHR_HUMAN	IMPA3_HUMAN	GALK2_HUMAN
HMGA1_HUMAN	GSK3A_HUMAN	IPYR_HUMAN	GALT2_HUMAN
HMGA2_HUMAN	GSK3B_HUMAN	IPYR2_HUMAN	GANAB_HUMAN
HMGB1_HUMAN	GSLG1_HUMAN	IQCAL_HUMAN	GAS7_HUMAN
HMGB2_HUMAN	GSTK1_HUMAN	IQGA1_HUMAN	GBB1_HUMAN
HMGB3_HUMAN	GSTO1_HUMAN	IRAK4_HUMAN	GBB2_HUMAN
HMGN1_HUMAN	GSTP1_HUMAN	ITA3_HUMAN	GBF1_HUMAN
HMGN2_HUMAN	GTF2I_HUMAN	ITA5_HUMAN	GBG12_HUMAN
HMOX2_HUMAN	GTR1_HUMAN	ITA6_HUMAN	GBG2_HUMAN
HN1_HUMAN	GUAA_HUMAN	ITAV_HUMAN	GBLP_HUMAN
HNRCL_HUMAN	GXLT2_HUMAN	ITB1_HUMAN	GBRL2_HUMAN
HNRDL_HUMAN	H10_HUMAN	ITB3_HUMAN	GCN1L_HUMAN
HNRH1_HUMAN	H11_HUMAN	ITIH5_HUMAN	GCP60_HUMAN
HNRH2_HUMAN	H12_HUMAN	ITPR3_HUMAN	GDIA_HUMAN
HNRL1_HUMAN	H13_HUMAN	K6PP_HUMAN	GDIB_HUMAN
HNRL2_HUMAN	H14_HUMAN	KAD1_HUMAN	GDIR1_HUMAN
HNRPC_HUMAN	H15_HUMAN	KAD2_HUMAN	GDN_HUMAN
HNRPD_HUMAN	H1X_HUMAN	KAD3_HUMAN	GELS_HUMAN
HNRPF_HUMAN	H2A1C_HUMAN	KAD5_HUMAN	GGCT_HUMAN
HNRPK_HUMAN	H2A1D_HUMAN	KBP_HUMAN	GGH_HUMAN
HNRPL_HUMAN	H2A2B_HUMAN	KC1A_HUMAN	GIPC1_HUMAN
HNRPM_HUMAN	H2A2C_HUMAN	KC1E_HUMAN	GLO2_HUMAN
HNRPQ_HUMAN	H2AX_HUMAN	KCC1A_HUMAN	GLOD4_HUMAN
HNRPR_HUMAN	H2AY_HUMAN	KCC1D_HUMAN	GLRX3_HUMAN
HNRPU_HUMAN	H2AZ_HUMAN	KCC2D_HUMAN	GLSK_HUMAN
HOOK3_HUMAN	H2B1B_HUMAN	KCC2G_HUMAN	GLU2B_HUMAN
HP1B3_HUMAN	H2B1D_HUMAN	KCC4_HUMAN	GLYM_HUMAN
HPBP1_HUMAN	H2B1H_HUMAN	KCY_HUMAN	GMFB_HUMAN
HPCL1_HUMAN	H2B1J_HUMAN	KGUA_HUMAN	GMPPA_HUMAN
HPRT_HUMAN	H2B1K_HUMAN	KHDR1_HUMAN	GNA1_HUMAN
HS105_HUMAN	H2B1L_HUMAN	KHDR3_HUMAN	GNAI2_HUMAN
HS71L_HUMAN	H2B1M_HUMAN	KI67_HUMAN	GNAO_HUMAN
HS90A_HUMAN	H31_HUMAN	KIF5C_HUMAN	GNAS2_HUMAN
HS90B_HUMAN	H32_HUMAN	KINH_HUMAN	GNL3_HUMAN
HSDL2_HUMAN	H33_HUMAN	KLC1_HUMAN	GNS_HUMAN
HSP71_HUMAN	H4_HUMAN	KLHL1_HUMAN	GOGA3_HUMAN
HSP72_HUMAN	H90B2_HUMAN	KPCD_HUMAN	GOGB1_HUMAN
HSP74_HUMAN	H90B3_HUMAN	KPCD2_HUMAN	GOLM1_HUMAN
HSP7C_HUMAN	HACD3_HUMAN	KPCI_HUMAN	GORS2_HUMAN
HSP7E_HUMAN	HAP28_HUMAN	KPYM_HUMAN	GOSR2_HUMAN
HUWE1_HUMAN	HCD2_HUMAN	KS6A1_HUMAN	GPDM_HUMAN
HXK1_HUMAN	HCDH_HUMAN	KS6A3_HUMAN	GPX8_HUMAN
HYOU1_HUMAN	HCFC1_HUMAN	KS6A5_HUMAN	GRM7_HUMAN
I2BP1_HUMAN	HDAC1_HUMAN	KS6B1_HUMAN	GRN_HUMAN
IBTK_HUMAN	HDAC2_HUMAN	KS6B2_HUMAN	GRP75_HUMAN
ICAL_HUMAN	HDDC2_HUMAN	KS6C1_HUMAN	GRP78_HUMAN
IDE_HUMAN	HDGF_HUMAN	KTHY_HUMAN	GRPE1_HUMAN
IDH3A_HUMAN	HDGR2_HUMAN	KTN1_HUMAN	GRSF1_HUMAN
IDH3B_HUMAN	HDGR3_HUMAN	LA_HUMAN	GSHB_HUMAN
IDH3G_HUMAN	HDHD3_HUMAN	LAMP1_HUMAN	GSHR_HUMAN
IDHC_HUMAN	HEBP1_HUMAN	LAMP2_HUMAN	GSK3A_HUMAN
IF16_HUMAN	HEM6_HUMAN	LAP2A_HUMAN	GSK3B_HUMAN
IF1AX_HUMAN	HEXA_HUMAN	LAP2B_HUMAN	GSLG1_HUMAN
IF2A_HUMAN	HEXB_HUMAN	LAR1B_HUMAN	GST2_HUMAN
IF2B_HUMAN	HGS_HUMAN	LARP1_HUMAN	GSTK1_HUMAN
IF2B1_HUMAN	HIBCH_HUMAN	LASP1_HUMAN	GSTO1_HUMAN
IF2B2_HUMAN	HINT1_HUMAN	LATS1_HUMAN	GSTP1_HUMAN
IF2B3_HUMAN	HM13_HUMAN	LC7L2_HUMAN	GTF2I_HUMAN
IF2G_HUMAN	HM20A_HUMAN	LDHA_HUMAN	GTPB1_HUMAN
IF2P_HUMAN	HMGA1_HUMAN	LDHB_HUMAN	GTR1_HUMAN
IF4A1_HUMAN	HMGB1_HUMAN	LEG1_HUMAN	GUAA_HUMAN
IF4A3_HUMAN	HMGB2_HUMAN	LEG3_HUMAN	GWL_HUMAN
IF4B_HUMAN	HMGB3_HUMAN	LGUL_HUMAN	GYS1_HUMAN
IF4E_HUMAN	HMGCL_HUMAN	LIMS1_HUMAN	H10_HUMAN
IF4G1_HUMAN	HMGN1_HUMAN	LIN7C_HUMAN	H11_HUMAN
IF4G2_HUMAN	HMGN2_HUMAN	LIPB1_HUMAN	H12_HUMAN
IF4G3_HUMAN	HMGN3_HUMAN	LMAN1_HUMAN	H13_HUMAN
IF4H_HUMAN	HMGN4_HUMAN	LMAN2_HUMAN	H14_HUMAN
IF5_HUMAN	HMOX2_HUMAN	LMNA_HUMAN	H15_HUMAN
IF5A1_HUMAN	HN1L_HUMAN	LMNB1_HUMAN	H1X_HUMAN
IFIT5_HUMAN	HNRDL_HUMAN	LMNB2_HUMAN	H2A1B_HUMAN
IFNG_HUMAN	HNRH1_HUMAN	LONM_HUMAN	H2A1D_HUMAN
IKKA_HUMAN	HNRH2_HUMAN	LPPRC_HUMAN	H2A2B_HUMAN
IKKB_HUMAN	HNRH3_HUMAN	LRC59_HUMAN	H2A2C_HUMAN
ILF2_HUMAN	HNRL1_HUMAN	LRP5_HUMAN	H2AX_HUMAN
ILF3_HUMAN	HNRL2_HUMAN	LRRF1_HUMAN	H2AY_HUMAN
ILK_HUMAN	HNRPC_HUMAN	LSM6_HUMAN	H2AZ_HUMAN
ILVBL_HUMAN	HNRPD_HUMAN	LYAR_HUMAN	H2B1A_HUMAN
IMB1_HUMAN	HNRPF_HUMAN	LYN_HUMAN	H2B1B_HUMAN
IMDH2_HUMAN	HNRPK_HUMAN	LYPA2_HUMAN	H2B1D_HUMAN
IMMT_HUMAN	HNRPL_HUMAN	LYRIC_HUMAN	H2B1K_HUMAN
INT3_HUMAN	HNRPM_HUMAN	LYRM7_HUMAN	H2B1L_HUMAN
IP6K1_HUMAN	HNRPQ_HUMAN	M3K11_HUMAN	H2B1M_HUMAN
IPO11_HUMAN	HNRPR_HUMAN	M3K2_HUMAN	H2B1O_HUMAN
IPO4_HUMAN	HNRPU_HUMAN	M3K4_HUMAN	H2B2F_HUMAN
IPO5_HUMAN	HP1B3_HUMAN	M3K5_HUMAN	H2B3B_HUMAN
IPYR_HUMAN	HPCL1_HUMAN	M4K2_HUMAN	H31_HUMAN
IPYR2_HUMAN	HPRT_HUMAN	M4K3_HUMAN	H33_HUMAN
IQGA1_HUMAN	HS105_HUMAN	M4K4_HUMAN	H4_HUMAN
IRAK4_HUMAN	HS904_HUMAN	M4K5_HUMAN	H90B2_HUMAN
ISOC2_HUMAN	HS90A_HUMAN	MANF_HUMAN	H90B4_HUMAN
ITA3_HUMAN	HS90B_HUMAN	MAOM_HUMAN	HACD3_HUMAN
ITB1_HUMAN	HSP13_HUMAN	MAP11_HUMAN	HAP28_HUMAN
ITPR3_HUMAN	HSP71_HUMAN	MAP1B_HUMAN	HAT1_HUMAN
JUNB_HUMAN	HSP74_HUMAN	MAP4_HUMAN	HBB_HUMAN
K0195_HUMAN	HSP7C_HUMAN	MARCS_HUMAN	HCD2_HUMAN
K1C18_HUMAN	HSP7E_HUMAN	MARE1_HUMAN	HCDH_HUMAN
K6PF_HUMAN	HSPB1_HUMAN	MARK1_HUMAN	HCFC1_HUMAN
K6PP_HUMAN	HTSF1_HUMAN	MARK2_HUMAN	HCK_HUMAN
KAD1_HUMAN	HXK1_HUMAN	MARK3_HUMAN	HDAC2_HUMAN
KAD2_HUMAN	HYEP_HUMAN	MARK4_HUMAN	HDGF_HUMAN
KAD4_HUMAN	HYOU1_HUMAN	MAST3_HUMAN	HDGR2_HUMAN
KBP_HUMAN	ICAM1_HUMAN	MATR3_HUMAN	HDGR3_HUMAN
KC1A_HUMAN	IDH3A_HUMAN	MBNL1_HUMAN	HDHD2_HUMAN
KC1E_HUMAN	IDH3B_HUMAN	MBOA7_HUMAN	HEBP1_HUMAN
KC1G3_HUMAN	IDH3G_HUMAN	MCA3_HUMAN	HEM2_HUMAN
KCC1D_HUMAN	IDHC_HUMAN	MCCA_HUMAN	HEXB_HUMAN
KCC2D_HUMAN	IDHP_HUMAN	MCM2_HUMAN	HGS_HUMAN
KCC2G_HUMAN	IF16_HUMAN	MCM6_HUMAN	HIBCH_HUMAN
KCC4_HUMAN	IF1AX_HUMAN	MCTS1_HUMAN	HINT1_HUMAN
KCNKA_HUMAN	IF2A_HUMAN	MDHC_HUMAN	HM13_HUMAN
KCY_HUMAN	IF2B_HUMAN	MDHM_HUMAN	HMCS1_HUMAN
KDIS_HUMAN	IF2B2_HUMAN	MERTK_HUMAN	HMGA1_HUMAN
KDM5A_HUMAN	IF2B3_HUMAN	MESH1_HUMAN	HMGB1_HUMAN
KHDR1_HUMAN	IF2G_HUMAN	METK2_HUMAN	HMGB2_HUMAN
KIN17_HUMAN	IF2P_HUMAN	MGN2_HUMAN	HMGB3_HUMAN
KINH_HUMAN	IF4A1_HUMAN	MGST3_HUMAN	HMGN1_HUMAN
KLC1_HUMAN	IF4A2_HUMAN	MIA3_HUMAN	HMGN2_HUMAN
KLHL1_HUMAN	IF4A3_HUMAN	MICA2_HUMAN	HMGN3_HUMAN
KLHL5_HUMAN	IF4B_HUMAN	MICU2_HUMAN	HMGN4_HUMAN
KPB1_HUMAN	IF4G1_HUMAN	MIF_HUMAN	HMOX2_HUMAN
KPCD1_HUMAN	IF4G3_HUMAN	MK01_HUMAN	HN1_HUMAN
KPCD2_HUMAN	IF4H_HUMAN	MK10_HUMAN	HN1L_HUMAN
KPYM_HUMAN	IF5_HUMAN	ML12A_HUMAN	HNRDL_HUMAN
KRR1_HUMAN	IF5A1_HUMAN	MLKL_HUMAN	HNRH1_HUMAN
KS6A1_HUMAN	IL1AP_HUMAN	MMGT1_HUMAN	HNRH2_HUMAN
KS6A2_HUMAN	ILF2_HUMAN	MMP2_HUMAN	HNRH3_HUMAN
KS6A3_HUMAN	ILF3_HUMAN	MOES_HUMAN	HNRL1_HUMAN
KS6A5_HUMAN	ILK_HUMAN	MOGS_HUMAN	HNRL2_HUMAN
KS6B1_HUMAN	ILKAP_HUMAN	MP2K1_HUMAN	HNRLL_HUMAN
KS6B2_HUMAN	IMB1_HUMAN	MP2K3_HUMAN	HNRPC_HUMAN
KS6C1_HUMAN	IMDH2_HUMAN	MP2K4_HUMAN	HNRPD_HUMAN
KTHY_HUMAN	IMMT_HUMAN	MP2K6_HUMAN	HNRPF_HUMAN
KTN1_HUMAN	INO1_HUMAN	MP3B2_HUMAN	HNRPK_HUMAN
KYNU_HUMAN	IPP2_HUMAN	MPCP_HUMAN	HNRPL_HUMAN
L10K_HUMAN	IPYR_HUMAN	MRP_HUMAN	HNRPM_HUMAN
LA_HUMAN	IPYR2_HUMAN	MRT4_HUMAN	HNRPQ_HUMAN
LACB2_HUMAN	IQCAL_HUMAN	MS18A_HUMAN	HNRPR_HUMAN
LAMP1_HUMAN	IQGA1_HUMAN	MSH6_HUMAN	HNRPU_HUMAN
LAP2B_HUMAN	IQGA3_HUMAN	MST4_HUMAN	HP1B3_HUMAN
LAR1B_HUMAN	IRAK4_HUMAN	MT2_HUMAN	HPRT_HUMAN
LARP1_HUMAN	ISG15_HUMAN	MTAP_HUMAN	HS105_HUMAN
LARP4_HUMAN	ISOC2_HUMAN	MTCH2_HUMAN	HS74L_HUMAN
LASP1_HUMAN	ITA3_HUMAN	MTDC_HUMAN	HS904_HUMAN
LAT1_HUMAN	ITA5_HUMAN	MTPN_HUMAN	HS90A_HUMAN
LATS1_HUMAN	ITAV_HUMAN	MTRR_HUMAN	HS90B_HUMAN
LATS2_HUMAN	ITB1_HUMAN	MTU1_HUMAN	HSDL2_HUMAN
LC7L2_HUMAN	ITPA_HUMAN	MVP_HUMAN	HSP13_HUMAN
LDHA_HUMAN	IVD_HUMAN	MYH1_HUMAN	HSP71_HUMAN
LDHB_HUMAN	JIP4_HUMAN	MYH10_HUMAN	HSP72_HUMAN
LEG1_HUMAN	JPH2_HUMAN	MYH11_HUMAN	HSP74_HUMAN
LEG3_HUMAN	K0020_HUMAN	MYH9_HUMAN	HSP76_HUMAN
LETM1_HUMAN	K1377_HUMAN	MYL6_HUMAN	HSP7C_HUMAN
LGUL_HUMAN	K1C18_HUMAN	MYO1B_HUMAN	HSP7E_HUMAN
LIPB1_HUMAN	K6PF_HUMAN	MYOF_HUMAN	HSPB1_HUMAN
LIS1_HUMAN	K6PL_HUMAN	NAA10_HUMAN	HUWE1_HUMAN
LKHA4_HUMAN	K6PP_HUMAN	NAA15_HUMAN	HXK1_HUMAN
LMAN1_HUMAN	KAD1_HUMAN	NACAM_HUMAN	HYOU1_HUMAN
LMAN2_HUMAN	KAD2_HUMAN	NAKD2_HUMAN	ICAL_HUMAN
LMNA_HUMAN	KAD3_HUMAN	NAMPT_HUMAN	IDH3A_HUMAN
LMNB1_HUMAN	KAD4_HUMAN	NASP_HUMAN	IDH3B_HUMAN
LMNB2_HUMAN	KAP0_HUMAN	NAT10_HUMAN	IDHC_HUMAN
LONM_HUMAN	KAP3_HUMAN	NB5R3_HUMAN	IDHP_HUMAN
LPPRC_HUMAN	KAPCA_HUMAN	NBR1_HUMAN	IF16_HUMAN
LRC20_HUMAN	KAT3_HUMAN	NCBP1_HUMAN	IF1AX_HUMAN
LRC47_HUMAN	KC1A_HUMAN	NCF4_HUMAN	IF2A_HUMAN
LRC59_HUMAN	KC1E_HUMAN	NCKPL_HUMAN	IF2B_HUMAN
LSM3_HUMAN	KC1G3_HUMAN	NCOA3_HUMAN	IF2B2_HUMAN
LSM4_HUMAN	KCC1D_HUMAN	NCPR_HUMAN	IF2B3_HUMAN
LSM6_HUMAN	KCC2B_HUMAN	NDKA_HUMAN	IF2G_HUMAN
LYAR_HUMAN	KCC2D_HUMAN	NDKB_HUMAN	IF2P_HUMAN
LYPA2_HUMAN	KCC2G_HUMAN	NDUA4_HUMAN	IF4A1_HUMAN
LYRIC_HUMAN	KCY_HUMAN	NDUAC_HUMAN	IF4A2_HUMAN
LYRM7_HUMAN	KDM1B_HUMAN	NDUS1_HUMAN	IF4A3_HUMAN
M2OM_HUMAN	KHDR1_HUMAN	NDUS2_HUMAN	IF4B_HUMAN
M3K11_HUMAN	KHDR3_HUMAN	NDUS5_HUMAN	IF4E_HUMAN
M3K15_HUMAN	KINH_HUMAN	NEK3_HUMAN	IF4G1_HUMAN
M3K3_HUMAN	KLHL1_HUMAN	NEK4_HUMAN	IF4G2_HUMAN
M3K4_HUMAN	KLHL5_HUMAN	NEK7_HUMAN	IF4G3_HUMAN
M4K2_HUMAN	KPCA_HUMAN	NENF_HUMAN	IF4H_HUMAN
M4K3_HUMAN	KPCD1_HUMAN	NEST_HUMAN	IF5_HUMAN
M4K5_HUMAN	KPYM_HUMAN	NFKB2_HUMAN	IF5A1_HUMAN
MAGA4_HUMAN	KRR1_HUMAN	NGAL_HUMAN	IFIT5_HUMAN
MAGD2_HUMAN	KS6A1_HUMAN	NH2L1_HUMAN	IFNG_HUMAN
MANF_HUMAN	KS6A3_HUMAN	NHRF3_HUMAN	IKIP_HUMAN
MAOM_HUMAN	KS6B1_HUMAN	NIBAN_HUMAN	ILF2_HUMAN
MAP11_HUMAN	KS6C1_HUMAN	NIBL1_HUMAN	ILF3_HUMAN
MAP1B_HUMAN	KT3K_HUMAN	NIPS2_HUMAN	ILK_HUMAN
MAP2_HUMAN	KTHY_HUMAN	NLTP_HUMAN	ILVBL_HUMAN
MAP4_HUMAN	KTN1_HUMAN	NMT1_HUMAN	IMA1_HUMAN
MARCS_HUMAN	L10K_HUMAN	NNMT_HUMAN	IMB1_HUMAN
MARE1_HUMAN	L1CAM_HUMAN	NNRD_HUMAN	IMDH1_HUMAN
MARK2_HUMAN	LA_HUMAN	NNRE_HUMAN	IMDH2_HUMAN
MARK3_HUMAN	LAMB1_HUMAN	NOCT_HUMAN	IMMT_HUMAN
MARK4_HUMAN	LAMP1_HUMAN	NOG1_HUMAN	IPO7_HUMAN
MAST3_HUMAN	LAMP2_HUMAN	NONO_HUMAN	IPYR_HUMAN
MAST4_HUMAN	LANC1_HUMAN	NOP16_HUMAN	IQGA1_HUMAN
MAT2B_HUMAN	LAP2B_HUMAN	NOP2_HUMAN	IQGA2_HUMAN
MATR3_HUMAN	LARP1_HUMAN	NOP56_HUMAN	IQGA3_HUMAN
MBB1A_HUMAN	LASP1_HUMAN	NP1L1_HUMAN	IRAK4_HUMAN
MBNL1_HUMAN	LAT1_HUMAN	NP1L4_HUMAN	ISOC2_HUMAN
MBNL2_HUMAN	LBR_HUMAN	NPC2_HUMAN	IST1_HUMAN
MBOA7_HUMAN	LC7L2_HUMAN	NPM_HUMAN	ITA1_HUMAN
MCA3_HUMAN	LCK_HUMAN	NPT3_HUMAN	ITA2_HUMAN
MCCA_HUMAN	LDHA_HUMAN	NQO1_HUMAN	ITA3_HUMAN
MCM2_HUMAN	LDHB_HUMAN	NRK1_HUMAN	ITA4_HUMAN
MCM3_HUMAN	LEG1_HUMAN	NSF_HUMAN	ITAV_HUMAN
MCM5_HUMAN	LEG3_HUMAN	NTF2_HUMAN	ITB1_HUMAN
MCM6_HUMAN	LETM1_HUMAN	NTPCR_HUMAN	ITPA_HUMAN
MCM7_HUMAN	LG3BP_HUMAN	NUAK2_HUMAN	ITPK1_HUMAN
MCTS1_HUMAN	LGUL_HUMAN	NUBPL_HUMAN	ITPR3_HUMAN
MDHC_HUMAN	LIMA1_HUMAN	NUCB1_HUMAN	JARD2_HUMAN
MDHM_HUMAN	LIMS1_HUMAN	NUCB2_HUMAN	JUNB_HUMAN
MESH1_HUMAN	LIN7C_HUMAN	NUCKS_HUMAN	K0020_HUMAN
MET_HUMAN	LIPB1_HUMAN	NUCL_HUMAN	K1377_HUMAN
METK2_HUMAN	LMAN1_HUMAN	NUP50_HUMAN	K6PF_HUMAN
MFAP1_HUMAN	LMAN2_HUMAN	OAT_HUMAN	K6PL_HUMAN
MGN2_HUMAN	LMF2_HUMAN	OBSL1_HUMAN	K6PP_HUMAN
MGST1_HUMAN	LMNA_HUMAN	OCC1_HUMAN	KAD1_HUMAN
MGST3_HUMAN	LMNB1_HUMAN	ODO1_HUMAN	KAD2_HUMAN
MICA2_HUMAN	LMNB2_HUMAN	ODO2_HUMAN	KAP0_HUMAN
MIER1_HUMAN	LMO7_HUMAN	ODP2_HUMAN	KAPCA_HUMAN
MIF_HUMAN	LNP_HUMAN	ODPA_HUMAN	KBP_HUMAN
MINP1_HUMAN	LONM_HUMAN	ODPB_HUMAN	KC1A_HUMAN
MK01_HUMAN	LOXL2_HUMAN	OFUT1_HUMAN	KC1E_HUMAN
MK10_HUMAN	LPCT4_HUMAN	OLA1_HUMAN	KC1G1_HUMAN
MK14_HUMAN	LPPRC_HUMAN	OR5V1_HUMAN	KC1G3_HUMAN
MLKL_HUMAN	LRC47_HUMAN	ORN_HUMAN	KCC1D_HUMAN
MMAB_HUMAN	LRC49_HUMAN	OSBL8_HUMAN	KCC2D_HUMAN
MMP2_HUMAN	LRC59_HUMAN	OSGEP_HUMAN	KCC2G_HUMAN
MOB1A_HUMAN	LSM3_HUMAN	OST48_HUMAN	KCY_HUMAN
MOCOS_HUMAN	LSM6_HUMAN	OXA1L_HUMAN	KDEL2_HUMAN
MOES_HUMAN	LSM7_HUMAN	OXSR1_HUMAN	KDIS_HUMAN
MOGS_HUMAN	LSM8_HUMAN	P4HA1_HUMAN	KDM1B_HUMAN
MORC3_HUMAN	LTOR1_HUMAN	P5CR1_HUMAN	KGUA_HUMAN
MOT1_HUMAN	LYAR_HUMAN	P5CS_HUMAN	KHDR1_HUMAN
MP2K1_HUMAN	LYN_HUMAN	P5I11_HUMAN	KHDR3_HUMAN
MP2K3_HUMAN	LYRIC_HUMAN	PA1B2_HUMAN	KI67_HUMAN
MP2K4_HUMAN	LYRM7_HUMAN	PA2G4_HUMAN	KIF2C_HUMAN
MP2K6_HUMAN	LZTS1_HUMAN	PABP1_HUMAN	KIF5A_HUMAN
MP2K7_HUMAN	M2OM_HUMAN	PABP2_HUMAN	KIF9_HUMAN
MP3B2_HUMAN	M3K11_HUMAN	PABP4_HUMAN	KINH_HUMAN
MPCP_HUMAN	M3K3_HUMAN	PACN2_HUMAN	KLC1_HUMAN
MPP8_HUMAN	M4K4_HUMAN	PAIRB_HUMAN	KLHL5_HUMAN
MPRD_HUMAN	M4K5_HUMAN	PAK2_HUMAN	KMT2E_HUMAN
MPRI_HUMAN	MA2B1_HUMAN	PALLD_HUMAN	KPCD_HUMAN
MRE11_HUMAN	MAFG_HUMAN	PAN3_HUMAN	KPCD1_HUMAN
MRP_HUMAN	MAGAA_HUMAN	PARK7_HUMAN	KPCD2_HUMAN
MRP3_HUMAN	MAGD2_HUMAN	PARP1_HUMAN	KPCD3_HUMAN
MRT4_HUMAN	MAGE1_HUMAN	PARVA_HUMAN	KPCI_HUMAN
MST4_HUMAN	MANF_HUMAN	PATL1_HUMAN	KPYM_HUMAN
MT2_HUMAN	MAOM_HUMAN	PCBP1_HUMAN	KS6A1_HUMAN
MTAP_HUMAN	MAP11_HUMAN	PCBP2_HUMAN	KS6A2_HUMAN
MTHFS_HUMAN	MAP1B_HUMAN	PCCA_HUMAN	KS6A3_HUMAN
MTNB_HUMAN	MAP4_HUMAN	PCNA_HUMAN	KS6A5_HUMAN
MTPN_HUMAN	MARCS_HUMAN	PCNP_HUMAN	KS6B1_HUMAN
MTU1_HUMAN	MARE1_HUMAN	PCY2_HUMAN	KS6C1_HUMAN
MVP_HUMAN	MARE2_HUMAN	PDCD5_HUMAN	KT3K_HUMAN
MYCBP_HUMAN	MARK2_HUMAN	PDE12_HUMAN	KTHY_HUMAN
MYH10_HUMAN	MARK3_HUMAN	PDIA1_HUMAN	KTN1_HUMAN
MYH9_HUMAN	MAT2B_HUMAN	PDIA3_HUMAN	LA_HUMAN
MYL6_HUMAN	MATR3_HUMAN	PDIA4_HUMAN	LAMB1_HUMAN
MYLK3_HUMAN	MBB1A_HUMAN	PDIA5_HUMAN	LAMC1_HUMAN
MYO1A_HUMAN	MBNL1_HUMAN	PDIA6_HUMAN	LAMP1_HUMAN
MYO1B_HUMAN	MBOA7_HUMAN	PDLI1_HUMAN	LAMP2_HUMAN
MYO1C_HUMAN	MCA3_HUMAN	PDLI5_HUMAN	LANC1_HUMAN
MYO9A_HUMAN	MCCA_HUMAN	PDLI7_HUMAN	LAP2A_HUMAN
MYOF_HUMAN	MCCB_HUMAN	PDPK1_HUMAN	LAP2B_HUMAN
NAA15_HUMAN	MCES_HUMAN	PEBP1_HUMAN	LAR4B_HUMAN
NAA30_HUMAN	MCM2_HUMAN	PESC_HUMAN	LARP1_HUMAN
NAA50_HUMAN	MCM3_HUMAN	PFD1_HUMAN	LARP4_HUMAN
NACAM_HUMAN	MCM4_HUMAN	PFD3_HUMAN	LASP1_HUMAN
NAKD2_HUMAN	MCM5_HUMAN	PFD4_HUMAN	LAT1_HUMAN
NAMPT_HUMAN	MCM6_HUMAN	PFD5_HUMAN	LBH_HUMAN
NASP_HUMAN	MCM7_HUMAN	PFD6_HUMAN	LC7L2_HUMAN
NAT10_HUMAN	MCTS1_HUMAN	PGAM1_HUMAN	LDH6A_HUMAN
NB5R1_HUMAN	MDHC_HUMAN	PGK1_HUMAN	LDHA_HUMAN
NB5R3_HUMAN	MDHM_HUMAN	PGRC1_HUMAN	LDHB_HUMAN
NC2A_HUMAN	MECR_HUMAN	PGRC2_HUMAN	LEG1_HUMAN
NCBP1_HUMAN	MED10_HUMAN	PHB_HUMAN	LEG3_HUMAN
NCBP2_HUMAN	MELPH_HUMAN	PHB2_HUMAN	LETM1_HUMAN
NCF4_HUMAN	MESD_HUMAN	PHF5A_HUMAN	LGUL_HUMAN
NCKPL_HUMAN	MESH1_HUMAN	PHKG2_HUMAN	LIMA1_HUMAN
NCOAT_HUMAN	MFAP1_HUMAN	PHLA1_HUMAN	LIMS1_HUMAN
NCPR_HUMAN	MGAT2_HUMAN	PI42A_HUMAN	LIN7C_HUMAN
NDKA_HUMAN	MGMT_HUMAN	PI42C_HUMAN	LIPB1_HUMAN
NDKB_HUMAN	MGN2_HUMAN	PI4KA_HUMAN	LIRB5_HUMAN
NDUA4_HUMAN	MGST3_HUMAN	PI4KB_HUMAN	LIS1_HUMAN
NDUA5_HUMAN	MICA1_HUMAN	PICAL_HUMAN	LMAN1_HUMAN
NDUA7_HUMAN	MID51_HUMAN	PIMT_HUMAN	LMAN2_HUMAN
NDUA9_HUMAN	MIF_HUMAN	PIN1_HUMAN	LMNA_HUMAN
NDUAA_HUMAN	MIMIT_HUMAN	PININ_HUMAN	LMNB1_HUMAN
NDUAC_HUMAN	MK01_HUMAN	PIR_HUMAN	LMNB2_HUMAN
NDUB3_HUMAN	MK10_HUMAN	PK3CD_HUMAN	LMO7_HUMAN
NDUB4_HUMAN	ML12B_HUMAN	PLEC_HUMAN	LONM_HUMAN
NDUBA_HUMAN	MLEC_HUMAN	PLIN3_HUMAN	LOXL2_HUMAN
NDUC2_HUMAN	MLKL_HUMAN	PLK1_HUMAN	LOXL3_HUMAN
NDUS1_HUMAN	MMP2_HUMAN	PLOD1_HUMAN	LPCT4_HUMAN
NDUS2_HUMAN	MMSA_HUMAN	PLOD3_HUMAN	LPP_HUMAN
NDUS3_HUMAN	MOB1A_HUMAN	PMFBP_HUMAN	LPPRC_HUMAN
NDUS4_HUMAN	MOES_HUMAN	PMVK_HUMAN	LRC15_HUMAN
NDUS5_HUMAN	MOGS_HUMAN	PNPO_HUMAN	LRC47_HUMAN
NDUS7_HUMAN	MOT1_HUMAN	PNPT1_HUMAN	LRC59_HUMAN
NEDD8_HUMAN	MP2K1_HUMAN	PP1A_HUMAN	LS14B_HUMAN
NEK1_HUMAN	MP2K4_HUMAN	PP1B_HUMAN	LSM3_HUMAN
NEK3_HUMAN	MP2K6_HUMAN	PP1RB_HUMAN	LSM6_HUMAN
NEK4_HUMAN	MPCP_HUMAN	PP2AA_HUMAN	LYAG_HUMAN
NEK7_HUMAN	MPP8_HUMAN	PP2BA_HUMAN	LYAR_HUMAN
NEK8_HUMAN	MPPA_HUMAN	PPAL_HUMAN	LYPA1_HUMAN
NEK9_HUMAN	MPPB_HUMAN	PPCS_HUMAN	LYRIC_HUMAN
NELFA_HUMAN	MPRIP_HUMAN	PPGB_HUMAN	LYRM7_HUMAN
NELFE_HUMAN	MPV17_HUMAN	PPIA_HUMAN	M2OM_HUMAN
NEP1_HUMAN	MPZL1_HUMAN	PPIB_HUMAN	M3K11_HUMAN
NGAL_HUMAN	MRO2A_HUMAN	PPIF_HUMAN	M3K12_HUMAN
NH2L1_HUMAN	MRP_HUMAN	PPM1G_HUMAN	M3K2_HUMAN
NHP2_HUMAN	MRRP1_HUMAN	PPR3C_HUMAN	M3K3_HUMAN
NIBAN_HUMAN	MRT4_HUMAN	PPT1_HUMAN	M3K4_HUMAN
NIBL1_HUMAN	MSH6_HUMAN	PR40A_HUMAN	M3K6_HUMAN
NIP7_HUMAN	MSI2H_HUMAN	PRAF3_HUMAN	M4K2_HUMAN
NIPS1_HUMAN	MSPD2_HUMAN	PRDBP_HUMAN	M4K3_HUMAN
NIPS2_HUMAN	MT1G_HUMAN	PRDX1_HUMAN	M4K4_HUMAN
NLE1_HUMAN	MTA2_HUMAN	PRDX2_HUMAN	M4K5_HUMAN
NLTP_HUMAN	MTA3_HUMAN	PRDX3_HUMAN	MA2B1_HUMAN
NMT1_HUMAN	MTAP_HUMAN	PRDX4_HUMAN	MAFF_HUMAN
NNMT_HUMAN	MTCH1_HUMAN	PRDX5_HUMAN	MAGAA_HUMAN
NNRD_HUMAN	MTDC_HUMAN	PRDX6_HUMAN	MAGD2_HUMAN
NNRE_HUMAN	MTHFS_HUMAN	PREP_HUMAN	MAGT1_HUMAN
NNTM_HUMAN	MTHR_HUMAN	PRKDC_HUMAN	MANF_HUMAN
NOC2L_HUMAN	MTPN_HUMAN	PROF1_HUMAN	MAOM_HUMAN
NOC3L_HUMAN	MTU1_HUMAN	PROF2_HUMAN	MAP11_HUMAN
NOCT_HUMAN	MUC18_HUMAN	PRP19_HUMAN	MAP1B_HUMAN
NOG1_HUMAN	MVP_HUMAN	PRP4B_HUMAN	MAP2_HUMAN
NOL10_HUMAN	MXRA7_HUMAN	PRP6_HUMAN	MAP4_HUMAN
NOL7_HUMAN	MY18A_HUMAN	PRP8_HUMAN	MARCS_HUMAN
NOLC1_HUMAN	MYCBP_HUMAN	PRPF3_HUMAN	MARE1_HUMAN
NONO_HUMAN	MYG1_HUMAN	PRPK_HUMAN	MARE2_HUMAN
NOP10_HUMAN	MYH10_HUMAN	PRS10_HUMAN	MARK1_HUMAN
NOP16_HUMAN	MYH11_HUMAN	PRS4_HUMAN	MARK2_HUMAN
NOP2_HUMAN	MYH14_HUMAN	PRS6A_HUMAN	MARK3_HUMAN
NOP56_HUMAN	MYH3_HUMAN	PRS6B_HUMAN	MARK4_HUMAN
NOP58_HUMAN	MYH9_HUMAN	PRS7_HUMAN	MAST3_HUMAN
NP1L1_HUMAN	MYL3_HUMAN	PRS8_HUMAN	MAT2B_HUMAN
NP1L4_HUMAN	MYL6_HUMAN	PSA1_HUMAN	MATR3_HUMAN
NPL4_HUMAN	MYLK_HUMAN	PSA2_HUMAN	MBB1A_HUMAN
NPM_HUMAN	MYO1B_HUMAN	PSA3_HUMAN	MBD3_HUMAN
NQO1_HUMAN	MYO1C_HUMAN	PSA4_HUMAN	MBNL1_HUMAN
NSF_HUMAN	MYO5A_HUMAN	PSA5_HUMAN	MBOA7_HUMAN
NSF1C_HUMAN	MYO5C_HUMAN	PSA6_HUMAN	MCA3_HUMAN
NSUN2_HUMAN	MYO7B_HUMAN	PSA7_HUMAN	MCCA_HUMAN
NSUN6_HUMAN	MYOF_HUMAN	PSB1_HUMAN	MCM2_HUMAN
NTF2_HUMAN	NAA50_HUMAN	PSB10_HUMAN	MCM3_HUMAN
NTPCR_HUMAN	NACAM_HUMAN	PSD11_HUMAN	MCM4_HUMAN
NUAK2_HUMAN	NAGAB_HUMAN	PSD12_HUMAN	MCM5_HUMAN
NUCB1_HUMAN	NAGK_HUMAN	PSIP1_HUMAN	MCM6_HUMAN
NUCKS_HUMAN	NAKD2_HUMAN	PSMD1_HUMAN	MCM7_HUMAN
NUCL_HUMAN	NAMPT_HUMAN	PSMD2_HUMAN	MCTS1_HUMAN
NUDC_HUMAN	NASP_HUMAN	PSMD3_HUMAN	MDHC_HUMAN
NUMA1_HUMAN	NAT10_HUMAN	PSMD4_HUMAN	MDHM_HUMAN
NUP93_HUMAN	NB5R1_HUMAN	PSMD6_HUMAN	MESH1_HUMAN
NUP98_HUMAN	NB5R3_HUMAN	PSMD7_HUMAN	METK2_HUMAN
OAT_HUMAN	NCF4_HUMAN	PSMD8_HUMAN	MFAP1_HUMAN
OBSCN_HUMAN	NCKP1_HUMAN	PSMD9_HUMAN	MGN2_HUMAN
OCAD1_HUMAN	NCOA1_HUMAN	PSME1_HUMAN	MGST3_HUMAN
ODB2_HUMAN	NCPR_HUMAN	PSME2_HUMAN	MIF_HUMAN
ODO1_HUMAN	NDC80_HUMAN	PSME3_HUMAN	MILK2_HUMAN
ODO2_HUMAN	NDKA_HUMAN	PSPC1_HUMAN	MK01_HUMAN
ODP2_HUMAN	NDKB_HUMAN	PTBP1_HUMAN	MK67I_HUMAN
ODPA_HUMAN	NDKM_HUMAN	PTBP2_HUMAN	ML12B_HUMAN
ODPB_HUMAN	NDUA2_HUMAN	PTBP3_HUMAN	MLEC_HUMAN
OFUT1_HUMAN	NDUA4_HUMAN	PTK7_HUMAN	MLKL_HUMAN
OLA1_HUMAN	NDUA5_HUMAN	PTMA_HUMAN	MLTK_HUMAN
OSGEP_HUMAN	NDUA6_HUMAN	PTMS_HUMAN	MMAB_HUMAN
OST48_HUMAN	NDUA7_HUMAN	PTN1_HUMAN	MMP14_HUMAN
OSTC_HUMAN	NDUA9_HUMAN	PTRF_HUMAN	MMP2_HUMAN
OTUB1_HUMAN	NDUAA_HUMAN	PUF60_HUMAN	MO4L1_HUMAN
OXSR1_HUMAN	NDUAC_HUMAN	PUR1_HUMAN	MOB1A_HUMAN
P3C2A_HUMAN	NDUAD_HUMAN	PUR2_HUMAN	MOES_HUMAN
P4K2A_HUMAN	NDUB1_HUMAN	PUR6_HUMAN	MOGS_HUMAN
P5CR1_HUMAN	NDUB3_HUMAN	PUR9_HUMAN	MORC2_HUMAN
P5CR2_HUMAN	NDUB6_HUMAN	PURA_HUMAN	MOT1_HUMAN
P5CS_HUMAN	NDUB7_HUMAN	PURB_HUMAN	MP2K1_HUMAN
PA1B2_HUMAN	NDUB9_HUMAN	PXK_HUMAN	MP2K2_HUMAN
PA2G4_HUMAN	NDUBA_HUMAN	PYC_HUMAN	MP2K3_HUMAN
PABP1_HUMAN	NDUC2_HUMAN	PYGB_HUMAN	MP2K4_HUMAN
PABP2_HUMAN	NDUS1_HUMAN	PYGL_HUMAN	MP2K6_HUMAN
PABP4_HUMAN	NDUS2_HUMAN	PYR1_HUMAN	MP3B2_HUMAN
PACN2_HUMAN	NDUS3_HUMAN	QCR1_HUMAN	MPCP_HUMAN
PAIRB_HUMAN	NDUS4_HUMAN	QCR2_HUMAN	MPP8_HUMAN
PAN3_HUMAN	NDUS5_HUMAN	QCR6_HUMAN	MRP_HUMAN
PANK4_HUMAN	NDUS7_HUMAN	QCR7_HUMAN	MSI1H_HUMAN
PAPS1_HUMAN	NDUV1_HUMAN	QCR9_HUMAN	MST4_HUMAN
PAPS2_HUMAN	NDUV2_HUMAN	QORX_HUMAN	MTA2_HUMAN
PARK7_HUMAN	NEDD8_HUMAN	RAB10_HUMAN	MTCH2_HUMAN
PARN_HUMAN	NEK7_HUMAN	RAB13_HUMAN	MTPN_HUMAN
PARP1_HUMAN	NEK9_HUMAN	RAB14_HUMAN	MTU1_HUMAN
PCBP1_HUMAN	NENF_HUMAN	RAB1A_HUMAN	MUC18_HUMAN
PCBP2_HUMAN	NEPR1_HUMAN	RAB2A_HUMAN	MY18A_HUMAN
PCCA_HUMAN	NEUA_HUMAN	RAB5C_HUMAN	MYH10_HUMAN
PCNA_HUMAN	NH2L1_HUMAN	RAB6A_HUMAN	MYH14_HUMAN
PCNP_HUMAN	NHP2_HUMAN	RAB7A_HUMAN	MYH6_HUMAN
PCY2_HUMAN	NHRF1_HUMAN	RAC1_HUMAN	MYH9_HUMAN
PCYOX_HUMAN	NIBL1_HUMAN	RAD21_HUMAN	MYL3_HUMAN
PDC6I_HUMAN	NIP7_HUMAN	RADI_HUMAN	MYL6_HUMAN
PDCD5_HUMAN	NIPS1_HUMAN	RAE1L_HUMAN	MYO1B_HUMAN
PDE12_HUMAN	NIPS2_HUMAN	RAGP1_HUMAN	MYO1C_HUMAN
PDIA1_HUMAN	NMT1_HUMAN	RAI14_HUMAN	MYO7B_HUMAN
PDIA3_HUMAN	NNMT_HUMAN	RALA_HUMAN	MYO9B_HUMAN
PDIA4_HUMAN	NNRD_HUMAN	RALY_HUMAN	MYOF_HUMAN
PDIA6_HUMAN	NNRE_HUMAN	RAN_HUMAN	MYPT1_HUMAN
PDLI1_HUMAN	NNTM_HUMAN	RANB3_HUMAN	MYRIP_HUMAN
PDLI7_HUMAN	NOC2L_HUMAN	RANG_HUMAN	NAA10_HUMAN
PDPK1_HUMAN	NOC3L_HUMAN	RAP1B_HUMAN	NAA15_HUMAN
PEBP1_HUMAN	NOC4L_HUMAN	RASF8_HUMAN	NAA30_HUMAN
PELP1_HUMAN	NOG1_HUMAN	RB11B_HUMAN	NAA50_HUMAN
PERQ2_HUMAN	NOL7_HUMAN	RB6I2_HUMAN	NACAM_HUMAN
PESC_HUMAN	NOL9_HUMAN	RBBP4_HUMAN	NAKD2_HUMAN
PFD1_HUMAN	NOLC1_HUMAN	RBBP7_HUMAN	NAMPT_HUMAN
PFD2_HUMAN	NONO_HUMAN	RBM25_HUMAN	NASP_HUMAN
PFD3_HUMAN	NOP10_HUMAN	RBM39_HUMAN	NAT10_HUMAN
PFD4_HUMAN	NOP16_HUMAN	RBM4_HUMAN	NB5R1_HUMAN
PFD5_HUMAN	NOP2_HUMAN	RBMS1_HUMAN	NB5R3_HUMAN
PFD6_HUMAN	NOP56_HUMAN	RBMX_HUMAN	NCBP2_HUMAN
PGAM1_HUMAN	NOP58_HUMAN	RBP2_HUMAN	NCF4_HUMAN
PGAM2_HUMAN	NP1L1_HUMAN	RBP56_HUMAN	NCKPL_HUMAN
PGES2_HUMAN	NP1L4_HUMAN	RCC1_HUMAN	NCOA1_HUMAN
PGK1_HUMAN	NPC2_HUMAN	RCC2_HUMAN	NCPR_HUMAN
PGM1_HUMAN	NPL4_HUMAN	RCN1_HUMAN	NDKA_HUMAN
PGM2_HUMAN	NPM_HUMAN	RD23A_HUMAN	NDKB_HUMAN
PGRC1_HUMAN	NQO1_HUMAN	RD23B_HUMAN	NDKM_HUMAN
PGRC2_HUMAN	NSA2_HUMAN	RECQ1_HUMAN	NDUA2_HUMAN
PGTB1_HUMAN	NSDHL_HUMAN	REEP5_HUMAN	NDUA4_HUMAN
PHB_HUMAN	NSF_HUMAN	RENT1_HUMAN	NDUA5_HUMAN
PHB2_HUMAN	NSF1C_HUMAN	RENT2_HUMAN	NDUAC_HUMAN
PHF5A_HUMAN	NSUN2_HUMAN	RFC2_HUMAN	NDUB1_HUMAN
PHKG2_HUMAN	NTF2_HUMAN	RFIP5_HUMAN	NDUB6_HUMAN
PHLA1_HUMAN	NU153_HUMAN	RFX1_HUMAN	NDUBA_HUMAN
PHLA3_HUMAN	NU205_HUMAN	RGPD8_HUMAN	NDUS1_HUMAN
PHX2A_HUMAN	NU5M_HUMAN	RHOA_HUMAN	NDUS2_HUMAN
PI42A_HUMAN	NUAK1_HUMAN	RHOC_HUMAN	NDUS4_HUMAN
PI42C_HUMAN	NUBPL_HUMAN	RIC8A_HUMAN	NDUS5_HUMAN
PICAL_HUMAN	NUCB1_HUMAN	RINI_HUMAN	NDUV1_HUMAN
PININ_HUMAN	NUCKS_HUMAN	RIOK2_HUMAN	NEDD8_HUMAN
PLCB4_HUMAN	NUCL_HUMAN	RL10_HUMAN	NEK1_HUMAN
PLEC_HUMAN	NUDC_HUMAN	RL10A_HUMAN	NEK3_HUMAN
PLIN2_HUMAN	NUDT9_HUMAN	RL11_HUMAN	NEK4_HUMAN
PLK1_HUMAN	NUMA1_HUMAN	RL12_HUMAN	NEK7_HUMAN
PLOD2_HUMAN	NUP50_HUMAN	RL13_HUMAN	NEK9_HUMAN
PLOD3_HUMAN	O51F1_HUMAN	RL13A_HUMAN	NELFE_HUMAN
PLPL9_HUMAN	OAS1_HUMAN	RL14_HUMAN	NENF_HUMAN
PMVK_HUMAN	OASL_HUMAN	RL15_HUMAN	NEP1_HUMAN
PNPH_HUMAN	OAT_HUMAN	RL17_HUMAN	NEST_HUMAN
PNPO_HUMAN	OBSCN_HUMAN	RL18_HUMAN	NFAC2_HUMAN
PNPT1_HUMAN	OCAD1_HUMAN	RL18A_HUMAN	NFIC_HUMAN
PP1A_HUMAN	ODB2_HUMAN	RL19_HUMAN	NH2L1_HUMAN
PP1B_HUMAN	ODBA_HUMAN	RL1D1_HUMAN	NHP2_HUMAN
PP1G_HUMAN	ODO1_HUMAN	RL21_HUMAN	NHRF2_HUMAN
PP1R8_HUMAN	ODO2_HUMAN	RL22_HUMAN	NIBL1_HUMAN
PP2AA_HUMAN	ODP2_HUMAN	RL22L_HUMAN	NIPS1_HUMAN
PPAL_HUMAN	ODPA_HUMAN	RL23_HUMAN	NIPS2_HUMAN
PPCS_HUMAN	OFUT1_HUMAN	RL23A_HUMAN	NLTP_HUMAN
PPHLN_HUMAN	OGDHL_HUMAN	RL24_HUMAN	NMD3_HUMAN
PPIA_HUMAN	OLA1_HUMAN	RL26_HUMAN	NMT1_HUMAN
PPIB_HUMAN	OPA1_HUMAN	RL27_HUMAN	NNRD_HUMAN
PPIF_HUMAN	OSBL1_HUMAN	RL27A_HUMAN	NNRE_HUMAN
PPM1G_HUMAN	OSGEP_HUMAN	RL28_HUMAN	NOG1_HUMAN
PPME1_HUMAN	OST48_HUMAN	RL29_HUMAN	NOL7_HUMAN
PPP5_HUMAN	OTUB1_HUMAN	RL3_HUMAN	NOLC1_HUMAN
PPR18_HUMAN	P2RX7_HUMAN	RL30_HUMAN	NONO_HUMAN
PPR3C_HUMAN	P4HA1_HUMAN	RL31_HUMAN	NOP10_HUMAN
PR40A_HUMAN	P4HA2_HUMAN	RL32_HUMAN	NOP16_HUMAN
PR40B_HUMAN	P4K2A_HUMAN	RL34_HUMAN	NOP2_HUMAN
PRC2A_HUMAN	P5CR1_HUMAN	RL35_HUMAN	NOP56_HUMAN
PRC2C_HUMAN	P5CR2_HUMAN	RL35A_HUMAN	NOP58_HUMAN
PRDBP_HUMAN	P5CS_HUMAN	RL36_HUMAN	NP1L1_HUMAN
PRDX1_HUMAN	PA2G4_HUMAN	RL36A_HUMAN	NP1L4_HUMAN
PRDX2_HUMAN	PABP1_HUMAN	RL36L_HUMAN	NPM_HUMAN
PRDX3_HUMAN	PABP2_HUMAN	RL37_HUMAN	NQO1_HUMAN
PRDX5_HUMAN	PABP4_HUMAN	RL37A_HUMAN	NRK1_HUMAN
PRDX6_HUMAN	PACN2_HUMAN	RL38_HUMAN	NSE2_HUMAN
PREP_HUMAN	PAIRB_HUMAN	RL39_HUMAN	NSF_HUMAN
PRKDC_HUMAN	PALM2_HUMAN	RL3L_HUMAN	NSF1C_HUMAN
PROF1_HUMAN	PARK7_HUMAN	RL4_HUMAN	NSUN2_HUMAN
PROF2_HUMAN	PARP1_HUMAN	RL40_HUMAN	NSUN6_HUMAN
PRP19_HUMAN	PARVA_HUMAN	RL5_HUMAN	NTF2_HUMAN
PRP31_HUMAN	PCBP1_HUMAN	RL6_HUMAN	NU153_HUMAN
PRP4B_HUMAN	PCBP2_HUMAN	RL7_HUMAN	NU205_HUMAN
PRP6_HUMAN	PCCA_HUMAN	RL7A_HUMAN	NUAK1_HUMAN
PRP8_HUMAN	PCKGM_HUMAN	RL8_HUMAN	NUAK2_HUMAN
PRPF3_HUMAN	PCNP_HUMAN	RL9_HUMAN	NUBP1_HUMAN
PRPK_HUMAN	PCY2_HUMAN	RLA0_HUMAN	NUBPL_HUMAN
PRPS1_HUMAN	PDCD5_HUMAN	RLA2_HUMAN	NUCB1_HUMAN
PRPS2_HUMAN	PDE12_HUMAN	RM03_HUMAN	NUCB2_HUMAN
PRS10_HUMAN	PDIA1_HUMAN	RM12_HUMAN	NUCKS_HUMAN
PRS4_HUMAN	PDIA3_HUMAN	RM32_HUMAN	NUCL_HUMAN
PRS6A_HUMAN	PDIA4_HUMAN	RM33_HUMAN	NUDC_HUMAN
PRS6B_HUMAN	PDIA6_HUMAN	RM51_HUMAN	NUDT9_HUMAN
PRS7_HUMAN	PDIP3_HUMAN	RMD1_HUMAN	NUFP2_HUMAN
PRS8_HUMAN	PDLI1_HUMAN	RN114_HUMAN	NUMA1_HUMAN
PSA_HUMAN	PDLI5_HUMAN	RNPS1_HUMAN	NUP50_HUMAN
PSA1_HUMAN	PDLI7_HUMAN	ROA0_HUMAN	NUP98_HUMAN
PSA2_HUMAN	PDPK1_HUMAN	ROA1_HUMAN	NYAP1_HUMAN
PSA4_HUMAN	PDPR_HUMAN	ROA2_HUMAN	O51F1_HUMAN
PSA5_HUMAN	PDXK_HUMAN	ROA3_HUMAN	OAT_HUMAN
PSA6_HUMAN	PEBP1_HUMAN	ROAA_HUMAN	OBSCN_HUMAN
PSA7_HUMAN	PELP1_HUMAN	ROCK1_HUMAN	OBSL1_HUMAN
PSB1_HUMAN	PEPD_HUMAN	ROCK2_HUMAN	ODB2_HUMAN
PSB10_HUMAN	PERM_HUMAN	RPC1_HUMAN	ODBA_HUMAN
PSB2_HUMAN	PESC_HUMAN	RPC9_HUMAN	ODO1_HUMAN
PSB3_HUMAN	PFD1_HUMAN	RPF2_HUMAN	ODO2_HUMAN
PSB4_HUMAN	PFD3_HUMAN	RPN1_HUMAN	ODP2_HUMAN
PSB7_HUMAN	PFD4_HUMAN	RPN2_HUMAN	ODPA_HUMAN
PSD10_HUMAN	PFD5_HUMAN	RRBP1_HUMAN	ODPB_HUMAN
PSD11_HUMAN	PFD6_HUMAN	RRP15_HUMAN	OFUT1_HUMAN
PSD12_HUMAN	PGAM1_HUMAN	RRP44_HUMAN	OGFR_HUMAN
PSD13_HUMAN	PGBM_HUMAN	RS10_HUMAN	OLA1_HUMAN
PSIP1_HUMAN	PGK1_HUMAN	RS11_HUMAN	ORN_HUMAN
PSMD1_HUMAN	PGM1_HUMAN	RS12_HUMAN	OSBL3_HUMAN
PSMD2_HUMAN	PGRC1_HUMAN	RS13_HUMAN	OSGEP_HUMAN
PSMD3_HUMAN	PGRC2_HUMAN	RS14_HUMAN	OXND1_HUMAN
PSMD4_HUMAN	PHB_HUMAN	RS15_HUMAN	OXSR1_HUMAN
PSMD6_HUMAN	PHB2_HUMAN	RS15A_HUMAN	P2RX7_HUMAN
PSMD7_HUMAN	PHC2_HUMAN	RS16_HUMAN	P3H1_HUMAN
PSMD8_HUMAN	PHF5A_HUMAN	RS17_HUMAN	P4HA1_HUMAN
PSMD9_HUMAN	PHF6_HUMAN	RS18_HUMAN	P5CR1_HUMAN
PSME1_HUMAN	PHKG2_HUMAN	RS19_HUMAN	P5CR2_HUMAN
PSME2_HUMAN	PI42A_HUMAN	RS2_HUMAN	P5CR3_HUMAN
PSME3_HUMAN	PI42C_HUMAN	RS20_HUMAN	P5CS_HUMAN
PSME4_HUMAN	PI4KA_HUMAN	RS21_HUMAN	P66A_HUMAN
PSPC1_HUMAN	PI51A_HUMAN	RS23_HUMAN	PA1B2_HUMAN
PTBP1_HUMAN	PICAL_HUMAN	RS24_HUMAN	PA2G4_HUMAN
PTBP3_HUMAN	PIN1_HUMAN	RS25_HUMAN	PABP1_HUMAN
PTH2_HUMAN	PININ_HUMAN	RS26_HUMAN	PABP2_HUMAN
PTMA_HUMAN	PIPNA_HUMAN	RS27_HUMAN	PABP4_HUMAN
PTMS_HUMAN	PIPNB_HUMAN	RS27A_HUMAN	PACN2_HUMAN
PTN1_HUMAN	PIR_HUMAN	RS27L_HUMAN	PADI4_HUMAN
PTN11_HUMAN	PKHF2_HUMAN	RS28_HUMAN	PAF1_HUMAN
PTRF_HUMAN	PLCB4_HUMAN	RS29_HUMAN	PAF15_HUMAN
PUF60_HUMAN	PLD2_HUMAN	RS3_HUMAN	PAIRB_HUMAN
PUR1_HUMAN	PLEC_HUMAN	RS30_HUMAN	PAK2_HUMAN
PUR2_HUMAN	PLK1_HUMAN	RS3A_HUMAN	PALLD_HUMAN
PUR4_HUMAN	PLOD2_HUMAN	RS4X_HUMAN	PAN3_HUMAN
PUR6_HUMAN	PLOD3_HUMAN	RS5_HUMAN	PAPS2_HUMAN
PUR8_HUMAN	PNCB_HUMAN	RS6_HUMAN	PAR12_HUMAN
PUR9_HUMAN	PNPO_HUMAN	RS7_HUMAN	PARK7_HUMAN
PURA_HUMAN	PNPT1_HUMAN	RS8_HUMAN	PARN_HUMAN
PURB_HUMAN	PP1A_HUMAN	RS9_HUMAN	PARP1_HUMAN
PXK_HUMAN	PP1B_HUMAN	RSMB_HUMAN	PARVA_HUMAN
PYC_HUMAN	PP1R8_HUMAN	RSPO4_HUMAN	PAXI_HUMAN
PYGB_HUMAN	PP2AA_HUMAN	RSSA_HUMAN	PCBP1_HUMAN
PYGL_HUMAN	PPAC_HUMAN	RSU1_HUMAN	PCBP2_HUMAN
PYR1_HUMAN	PPCS_HUMAN	RTCB_HUMAN	PCCA_HUMAN
PYRG1_HUMAN	PPGB_HUMAN	RTN4_HUMAN	PCNA_HUMAN
QCR1_HUMAN	PPIA_HUMAN	RU17_HUMAN	PCNP_HUMAN
QCR2_HUMAN	PPIB_HUMAN	RU1C_HUMAN	PCY1A_HUMAN
QCR6_HUMAN	PPIF_HUMAN	RU2A_HUMAN	PDC10_HUMAN
QCR7_HUMAN	PPME1_HUMAN	RU2B_HUMAN	PDC6I_HUMAN
QCR8_HUMAN	PPT1_HUMAN	RUVB1_HUMAN	PDCD5_HUMAN
QCR9_HUMAN	PR40A_HUMAN	RUXE_HUMAN	PDCD6_HUMAN
QKI_HUMAN	PRAF2_HUMAN	RUXG_HUMAN	PDE12_HUMAN
QOR_HUMAN	PRAF3_HUMAN	S100B_HUMAN	PDE1C_HUMAN
R39L5_HUMAN	PRDBP_HUMAN	S10A1_HUMAN	PDIA1_HUMAN
RAB10_HUMAN	PRDX1_HUMAN	S10A6_HUMAN	PDIA3_HUMAN
RAB13_HUMAN	PRDX2_HUMAN	S10AA_HUMAN	PDIA4_HUMAN
RAB14_HUMAN	PRDX3_HUMAN	S10AB_HUMAN	PDIA5_HUMAN
RAB1A_HUMAN	PRDX4_HUMAN	S10AD_HUMAN	PDIA6_HUMAN
RAB1B_HUMAN	PRDX5_HUMAN	S10AG_HUMAN	PDIP3_HUMAN
RAB21_HUMAN	PRDX6_HUMAN	S12A2_HUMAN	PDLI1_HUMAN
RAB5C_HUMAN	PREB_HUMAN	S12A4_HUMAN	PDLI2_HUMAN
RAB6C_HUMAN	PREP_HUMAN	S61A1_HUMAN	PDLI5_HUMAN
RAB7A_HUMAN	PRKDC_HUMAN	SAE2_HUMAN	PDPK1_HUMAN
RAC1_HUMAN	PRKRA_HUMAN	SAFB1_HUMAN	PDXD1_HUMAN
RAD21_HUMAN	PROF1_HUMAN	SAHH_HUMAN	PEA15_HUMAN
RAD50_HUMAN	PROF2_HUMAN	SAHH2_HUMAN	PEBB_HUMAN
RADI_HUMAN	PRP19_HUMAN	SAP_HUMAN	PEBP1_HUMAN
RAE1L_HUMAN	PRP31_HUMAN	SAP18_HUMAN	PELP1_HUMAN
RAI3_HUMAN	PRP4B_HUMAN	SAR1A_HUMAN	PEPD_HUMAN
RALA_HUMAN	PRP6_HUMAN	SARNP_HUMAN	PERQ2_HUMAN
RALY_HUMAN	PRP8_HUMAN	SBNO1_HUMAN	PESC_HUMAN
RAN_HUMAN	PRPF3_HUMAN	SC22B_HUMAN	PFD1_HUMAN
RANB3_HUMAN	PRPK_HUMAN	SC31A_HUMAN	PFD2_HUMAN
RANB9_HUMAN	PRPS1_HUMAN	SC61B_HUMAN	PFD3_HUMAN
RANG_HUMAN	PRPS2_HUMAN	SC61G_HUMAN	PFD4_HUMAN
RAP1B_HUMAN	PRRC1_HUMAN	SCMC1_HUMAN	PFD5_HUMAN
RASA3_HUMAN	PRS10_HUMAN	SCOT1_HUMAN	PFD6_HUMAN
RAVR1_HUMAN	PRS23_HUMAN	SCPDL_HUMAN	PGAM1_HUMAN
RB11B_HUMAN	PRS4_HUMAN	SDCB1_HUMAN	PGK1_HUMAN
RB22A_HUMAN	PRS6A_HUMAN	SDF2_HUMAN	PGM1_HUMAN
RB39A_HUMAN	PRS6B_HUMAN	SDHA_HUMAN	PGRC1_HUMAN
RBM12_HUMAN	PRS7_HUMAN	SDHB_HUMAN	PGRC2_HUMAN
RBM25_HUMAN	PRS8_HUMAN	SEC13_HUMAN	PGTB1_HUMAN
RBM26_HUMAN	PSA_HUMAN	SEC62_HUMAN	PHB_HUMAN
RBM28_HUMAN	PSA1_HUMAN	SEP10_HUMAN	PHB2_HUMAN
RBM39_HUMAN	PSA2_HUMAN	SEP11_HUMAN	PHC2_HUMAN
RBM4_HUMAN	PSA3_HUMAN	SEPT2_HUMAN	PHF5A_HUMAN
RBMX_HUMAN	PSA4_HUMAN	SEPT7_HUMAN	PHF6_HUMAN
RBP2_HUMAN	PSA5_HUMAN	SEPT9_HUMAN	PHKG2_HUMAN
RBSK_HUMAN	PSA6_HUMAN	SERA_HUMAN	PHLA1_HUMAN
RCC1_HUMAN	PSA7_HUMAN	SERC_HUMAN	PHLA2_HUMAN
RCC2_HUMAN	PSB1_HUMAN	SERP1_HUMAN	PHP14_HUMAN
RCN1_HUMAN	PSB10_HUMAN	SERPH_HUMAN	PI42A_HUMAN
RD23A_HUMAN	PSB2_HUMAN	SET_HUMAN	PI42C_HUMAN
RD23B_HUMAN	PSD11_HUMAN	SF01_HUMAN	PI4KA_HUMAN
RDH13_HUMAN	PSD12_HUMAN	SF3A1_HUMAN	PICAL_HUMAN
RECQ1_HUMAN	PSD13_HUMAN	SF3A2_HUMAN	PIMT_HUMAN
RED_HUMAN	PSIP1_HUMAN	SF3A3_HUMAN	PIN1_HUMAN
REEP5_HUMAN	PSMD1_HUMAN	SF3B1_HUMAN	PIN4_HUMAN
RENT1_HUMAN	PSMD2_HUMAN	SF3B2_HUMAN	PININ_HUMAN
RER1_HUMAN	PSMD3_HUMAN	SF3B3_HUMAN	PIPNB_HUMAN
RETST_HUMAN	PSMD4_HUMAN	SF3B4_HUMAN	PLBL2_HUMAN
RFA1_HUMAN	PSMD6_HUMAN	SF3B6_HUMAN	PLCB4_HUMAN
RFC2_HUMAN	PSMD7_HUMAN	SFPQ_HUMAN	PLCG1_HUMAN
RFC4_HUMAN	PSMD9_HUMAN	SFRP1_HUMAN	PLEC_HUMAN
RFC5_HUMAN	PSME1_HUMAN	SFXN1_HUMAN	PLIN3_HUMAN
RFX1_HUMAN	PSME2_HUMAN	SGTA_HUMAN	PLK1_HUMAN
RHG35_HUMAN	PSPC1_HUMAN	SH3G1_HUMAN	PLOD1_HUMAN
RHOB_HUMAN	PTBP1_HUMAN	SH3L3_HUMAN	PLOD2_HUMAN
RHOC_HUMAN	PTCD3_HUMAN	SIAS_HUMAN	PLOD3_HUMAN
RHOG_HUMAN	PTGR1_HUMAN	SIL1_HUMAN	PLRG1_HUMAN
RIMS1_HUMAN	PTH2_HUMAN	SIN3A_HUMAN	PLST_HUMAN
RING1_HUMAN	PTK7_HUMAN	SK2L2_HUMAN	PLXB2_HUMAN
RINI_HUMAN	PTMA_HUMAN	SKIV2_HUMAN	PMVK_HUMAN
RIR1_HUMAN	PTN1_HUMAN	SKP1_HUMAN	PNPH_HUMAN
RL10_HUMAN	PTRF_HUMAN	SLIRP_HUMAN	PNPO_HUMAN
RL10A_HUMAN	PUF60_HUMAN	SLK_HUMAN	PNPT1_HUMAN
RL11_HUMAN	PUR1_HUMAN	SLN11_HUMAN	PODXL_HUMAN
RL12_HUMAN	PUR2_HUMAN	SLTM_HUMAN	PON2_HUMAN
RL13_HUMAN	PUR4_HUMAN	SMAP_HUMAN	PP14B_HUMAN
RL13A_HUMAN	PUR6_HUMAN	SMBP2_HUMAN	PP1A_HUMAN
RL14_HUMAN	PUR8_HUMAN	SMC1A_HUMAN	PP1B_HUMAN
RL15_HUMAN	PUR9_HUMAN	SMC1B_HUMAN	PP1G_HUMAN
RL17_HUMAN	PURA_HUMAN	SMC3_HUMAN	PP1RA_HUMAN
RL18_HUMAN	PURB_HUMAN	SMC4_HUMAN	PP2AA_HUMAN
RL18A_HUMAN	PWP2_HUMAN	SMCA1_HUMAN	PP2BA_HUMAN
RL19_HUMAN	PYC_HUMAN	SMCA4_HUMAN	PPAC_HUMAN
RL1D1_HUMAN	PYGB_HUMAN	SMD1_HUMAN	PPAL_HUMAN
RL21_HUMAN	PYGL_HUMAN	SMD2_HUMAN	PPCS_HUMAN
RL22_HUMAN	PYR1_HUMAN	SMD3_HUMAN	PPIA_HUMAN
RL23_HUMAN	QCR1_HUMAN	SMN_HUMAN	PPIB_HUMAN
RL23A_HUMAN	QCR2_HUMAN	SMRC1_HUMAN	PPIC_HUMAN
RL24_HUMAN	QCR6_HUMAN	SMRD1_HUMAN	PPIF_HUMAN
RL26_HUMAN	QCR7_HUMAN	SND1_HUMAN	PPIL1_HUMAN
RL27_HUMAN	QCR8_HUMAN	SNR40_HUMAN	PPM1F_HUMAN
RL27A_HUMAN	QCR9_HUMAN	SNRPA_HUMAN	PPM1G_HUMAN
RL28_HUMAN	QIL1_HUMAN	SNW1_HUMAN	PPP5_HUMAN
RL29_HUMAN	QKI_HUMAN	SNX3_HUMAN	PPR18_HUMAN
RL3_HUMAN	QOR_HUMAN	SOAT1_HUMAN	PPR26_HUMAN
RL30_HUMAN	RAB10_HUMAN	SODC_HUMAN	PPT1_HUMAN
RL31_HUMAN	RAB13_HUMAN	SODM_HUMAN	PR40A_HUMAN
RL32_HUMAN	RAB14_HUMAN	SORCN_HUMAN	PRC2C_HUMAN
RL34_HUMAN	RAB1A_HUMAN	SOX10_HUMAN	PRDBP_HUMAN
RL35_HUMAN	RAB1B_HUMAN	SP100_HUMAN	PRDX1_HUMAN
RL35A_HUMAN	RAB21_HUMAN	SP16H_HUMAN	PRDX2_HUMAN
RL36_HUMAN	RAB35_HUMAN	SPCS2_HUMAN	PRDX3_HUMAN
RL36A_HUMAN	RAB38_HUMAN	SPCS3_HUMAN	PRDX4_HUMAN
RL36L_HUMAN	RAB3C_HUMAN	SPEE_HUMAN	PRDX5_HUMAN
RL37_HUMAN	RAB5B_HUMAN	SPEF2_HUMAN	PRDX6_HUMAN
RL37A_HUMAN	RAB5C_HUMAN	SPG17_HUMAN	PREP_HUMAN
RL38_HUMAN	RAB6A_HUMAN	SPS2L_HUMAN	PRKDC_HUMAN
RL3L_HUMAN	RAB7A_HUMAN	SPTA1_HUMAN	PRKRA_HUMAN
RL4_HUMAN	RABL3_HUMAN	SPTB1_HUMAN	PROF1_HUMAN
RL40_HUMAN	RAC1_HUMAN	SPTB2_HUMAN	PROF2_HUMAN
RL5_HUMAN	RAD21_HUMAN	SPTN1_HUMAN	PROS_HUMAN
RL6_HUMAN	RADI_HUMAN	SQRD_HUMAN	PRP19_HUMAN
RL7_HUMAN	RAE1L_HUMAN	SQSTM_HUMAN	PRP31_HUMAN
RL7A_HUMAN	RAGP1_HUMAN	SRC8_HUMAN	PRP4_HUMAN
RL8_HUMAN	RALA_HUMAN	SRP09_HUMAN	PRP4B_HUMAN
RL9_HUMAN	RALY_HUMAN	SRP14_HUMAN	PRP6_HUMAN
RLA0_HUMAN	RAN_HUMAN	SRP54_HUMAN	PRP8_HUMAN
RLA2_HUMAN	RANG_HUMAN	SRPK1_HUMAN	PRPF3_HUMAN
RM03_HUMAN	RAP1A_HUMAN	SRPK2_HUMAN	PRPK_HUMAN
RM09_HUMAN	RAP1B_HUMAN	SRPRB_HUMAN	PRPS2_HUMAN
RM11_HUMAN	RB11B_HUMAN	SRRT_HUMAN	PRRC1_HUMAN
RM12_HUMAN	RB27A_HUMAN	SRS11_HUMAN	PRS10_HUMAN
RM14_HUMAN	RB39A_HUMAN	SRSF1_HUMAN	PRS4_HUMAN
RM30_HUMAN	RBGPR_HUMAN	SRSF2_HUMAN	PRS6A_HUMAN
RM32_HUMAN	RBM12_HUMAN	SRSF3_HUMAN	PRS6B_HUMAN
RM33_HUMAN	RBM14_HUMAN	SRSF6_HUMAN	PRS7_HUMAN
RM40_HUMAN	RBM25_HUMAN	SRSF7_HUMAN	PRS8_HUMAN
RM51_HUMAN	RBM28_HUMAN	SSBP_HUMAN	PSA1_HUMAN
RM52_HUMAN	RBM39_HUMAN	SSRB_HUMAN	PSA2_HUMAN
RMD1_HUMAN	RBM4_HUMAN	SSRG_HUMAN	PSA4_HUMAN
RMXL1_HUMAN	RBMS1_HUMAN	SSRP1_HUMAN	PSA5_HUMAN
RN214_HUMAN	RBMX_HUMAN	ST38L_HUMAN	PSA6_HUMAN
RNPS1_HUMAN	RBP2_HUMAN	STAC3_HUMAN	PSA7_HUMAN
RO60_HUMAN	RBP56_HUMAN	STAT1_HUMAN	PSB10_HUMAN
ROA0_HUMAN	RBSK_HUMAN	STAT3_HUMAN	PSB2_HUMAN
ROA1_HUMAN	RCC1_HUMAN	STAU1_HUMAN	PSB4_HUMAN
ROA2_HUMAN	RCC2_HUMAN	STIP1_HUMAN	PSB5_HUMAN
ROA3_HUMAN	RCN1_HUMAN	STK10_HUMAN	PSD10_HUMAN
ROAA_HUMAN	RD23A_HUMAN	STK11_HUMAN	PSD11_HUMAN
ROCK1_HUMAN	RD23B_HUMAN	STK24_HUMAN	PSD12_HUMAN
ROCK2_HUMAN	RDH11_HUMAN	STK3_HUMAN	PSD13_HUMAN
RP3A_HUMAN	RECQ1_HUMAN	STK38_HUMAN	PSIP1_HUMAN
RPAP3_HUMAN	RED_HUMAN	STK4_HUMAN	PSMD1_HUMAN
RPB2_HUMAN	REEP5_HUMAN	STML2_HUMAN	PSMD2_HUMAN
RPC1_HUMAN	RELL1_HUMAN	STMN1_HUMAN	PSMD3_HUMAN
RPC9_HUMAN	RENBP_HUMAN	STRAA_HUMAN	PSMD4_HUMAN
RPN1_HUMAN	RENT1_HUMAN	STRN3_HUMAN	PSMD6_HUMAN
RPN2_HUMAN	REPS1_HUMAN	STT3A_HUMAN	PSMD7_HUMAN
RPR1B_HUMAN	RETST_HUMAN	STT3B_HUMAN	PSMD9_HUMAN
RRBP1_HUMAN	RFA1_HUMAN	STXB6_HUMAN	PSME1_HUMAN
RRP1_HUMAN	RFC2_HUMAN	SUCA_HUMAN	PSME2_HUMAN
RRP12_HUMAN	RFC4_HUMAN	SUCB1_HUMAN	PSME3_HUMAN
RRP15_HUMAN	RFC5_HUMAN	SUMO1_HUMAN	PSME4_HUMAN
RRP44_HUMAN	RFX1_HUMAN	SUMO2_HUMAN	PSPC1_HUMAN
RRP5_HUMAN	RGPD8_HUMAN	SURF4_HUMAN	PTBP1_HUMAN
RRS1_HUMAN	RGS14_HUMAN	SV2A_HUMAN	PTBP3_HUMAN
RS10_HUMAN	RHOC_HUMAN	SYAC_HUMAN	PTH2_HUMAN
RS11_HUMAN	RINI_HUMAN	SYCC_HUMAN	PTK7_HUMAN
RS12_HUMAN	RL10_HUMAN	SYEP_HUMAN	PTMA_HUMAN
RS13_HUMAN	RL10A_HUMAN	SYFA_HUMAN	PTMS_HUMAN
RS14_HUMAN	RL11_HUMAN	SYFB_HUMAN	PTN1_HUMAN
RS15_HUMAN	RL12_HUMAN	SYG_HUMAN	PTN12_HUMAN
RS15A_HUMAN	RL13_HUMAN	SYHC_HUMAN	PTN14_HUMAN
RS16_HUMAN	RL13A_HUMAN	SYIC_HUMAN	PTPS_HUMAN
RS17_HUMAN	RL14_HUMAN	SYIM_HUMAN	PTRF_HUMAN
RS18_HUMAN	RL15_HUMAN	SYK_HUMAN	PUF60_HUMAN
RS19_HUMAN	RL17_HUMAN	SYLC_HUMAN	PUM1_HUMAN
RS2_HUMAN	RL18_HUMAN	SYMC_HUMAN	PUR2_HUMAN
RS20_HUMAN	RL18A_HUMAN	SYNC_HUMAN	PUR4_HUMAN
RS21_HUMAN	RL19_HUMAN	SYNE1_HUMAN	PUR6_HUMAN
RS23_HUMAN	RL1D1_HUMAN	SYQ_HUMAN	PUR8_HUMAN
RS24_HUMAN	RL21_HUMAN	SYRC_HUMAN	PUR9_HUMAN
RS25_HUMAN	RL22_HUMAN	SYT10_HUMAN	PURA_HUMAN
RS26_HUMAN	RL23_HUMAN	SYT6_HUMAN	PURA2_HUMAN
RS27_HUMAN	RL23A_HUMAN	SYTC_HUMAN	PURB_HUMAN
RS27A_HUMAN	RL24_HUMAN	SYWC_HUMAN	PUS7_HUMAN
RS27L_HUMAN	RL26_HUMAN	SYYC_HUMAN	PYC_HUMAN
RS28_HUMAN	RL27_HUMAN	SYYM_HUMAN	PYGB_HUMAN
RS29_HUMAN	RL27A_HUMAN	T2FA_HUMAN	PYGL_HUMAN
RS3_HUMAN	RL28_HUMAN	TADBP_HUMAN	PYGM_HUMAN
RS30_HUMAN	RL29_HUMAN	TAGL2_HUMAN	PYR1_HUMAN
RS3A_HUMAN	RL3_HUMAN	TALDO_HUMAN	PYRG1_HUMAN
RS4X_HUMAN	RL30_HUMAN	TAOK1_HUMAN	QCR1_HUMAN
RS5_HUMAN	RL31_HUMAN	TAOK2_HUMAN	QCR2_HUMAN
RS6_HUMAN	RL32_HUMAN	TAOK3_HUMAN	QCR6_HUMAN
RS7_HUMAN	RL34_HUMAN	TATD1_HUMAN	QCR7_HUMAN
RS8_HUMAN	RL35_HUMAN	TBA3C_HUMAN	QCR8_HUMAN
RS9_HUMAN	RL35A_HUMAN	TBB2B_HUMAN	QKI_HUMAN
RSMB_HUMAN	RL36_HUMAN	TBB3_HUMAN	QOR_HUMAN
RSSA_HUMAN	RL36L_HUMAN	TBB4B_HUMAN	QORX_HUMAN
RT07_HUMAN	RL37_HUMAN	TBB5_HUMAN	RAB10_HUMAN
RT09_HUMAN	RL37A_HUMAN	TBCA_HUMAN	RAB13_HUMAN
RT11_HUMAN	RL38_HUMAN	TBCB_HUMAN	RAB14_HUMAN
RT18B_HUMAN	RL39_HUMAN	TBD2B_HUMAN	RAB1A_HUMAN
RT23_HUMAN	RL3L_HUMAN	TCEA1_HUMAN	RAB1B_HUMAN
RT27_HUMAN	RL4_HUMAN	TCP4_HUMAN	RAB2A_HUMAN
RT33_HUMAN	RL40_HUMAN	TCPA_HUMAN	RAB5B_HUMAN
RT36_HUMAN	RL5_HUMAN	TCPB_HUMAN	RAB5C_HUMAN
RTCB_HUMAN	RL6_HUMAN	TCPD_HUMAN	RAB6A_HUMAN
RTN3_HUMAN	RL7_HUMAN	TCPE_HUMAN	RAB7A_HUMAN
RTN4_HUMAN	RL7A_HUMAN	TCPG_HUMAN	RAC1_HUMAN
RU17_HUMAN	RL8_HUMAN	TCPH_HUMAN	RAD21_HUMAN
RU1C_HUMAN	RL9_HUMAN	TCPQ_HUMAN	RADI_HUMAN
RU2A_HUMAN	RLA0_HUMAN	TCPZ_HUMAN	RAE1L_HUMAN
RU2B_HUMAN	RLA1_HUMAN	TCRG1_HUMAN	RAGP1_HUMAN
RUVB1_HUMAN	RLA2_HUMAN	TCTP_HUMAN	RALA_HUMAN
RUVB2_HUMAN	RLBP1_HUMAN	TEBP_HUMAN	RALY_HUMAN
RUXE_HUMAN	RLP24_HUMAN	TECR_HUMAN	RAN_HUMAN
RUXG_HUMAN	RM01_HUMAN	TERA_HUMAN	RANG_HUMAN
S10A4_HUMAN	RM03_HUMAN	TET3_HUMAN	RAP1B_HUMAN
S10A6_HUMAN	RM04_HUMAN	TFG_HUMAN	RASA3_HUMAN
S10AA_HUMAN	RM09_HUMAN	TFR1_HUMAN	RB11B_HUMAN
S10AB_HUMAN	RM11_HUMAN	TGM2_HUMAN	RB39A_HUMAN
S10AD_HUMAN	RM12_HUMAN	THIL_HUMAN	RBM12_HUMAN
S10AG_HUMAN	RM16_HUMAN	THIO_HUMAN	RBM14_HUMAN
S12A2_HUMAN	RM22_HUMAN	THOC4_HUMAN	RBM25_HUMAN
S12A4_HUMAN	RM27_HUMAN	TIAR_HUMAN	RBM28_HUMAN
S12A6_HUMAN	RM28_HUMAN	TIF1B_HUMAN	RBM3_HUMAN
S12A7_HUMAN	RM30_HUMAN	TITIN_HUMAN	RBM39_HUMAN
S26A2_HUMAN	RM32_HUMAN	TKT_HUMAN	RBM4_HUMAN
S35B2_HUMAN	RM33_HUMAN	TLK1_HUMAN	RBMS1_HUMAN
S4A7_HUMAN	RM39_HUMAN	TLK2_HUMAN	RBMX_HUMAN
S61A1_HUMAN	RM40_HUMAN	TLN1_HUMAN	RBP2_HUMAN
SACS_HUMAN	RM44_HUMAN	TM165_HUMAN	RBSK_HUMAN
SAE1_HUMAN	RM47_HUMAN	TM9S2_HUMAN	RCC1_HUMAN
SAE2_HUMAN	RM49_HUMAN	TMCO1_HUMAN	RCC2_HUMAN
SAFB1_HUMAN	RM51_HUMAN	TMED9_HUMAN	RCN1_HUMAN
SAHH_HUMAN	RM53_HUMAN	TMEDA_HUMAN	RCN2_HUMAN
SAHH2_HUMAN	RM54_HUMAN	TMF1_HUMAN	RCN3_HUMAN
SAP_HUMAN	RM55_HUMAN	TMOD3_HUMAN	RD23A_HUMAN
SAP18_HUMAN	RMD1_HUMAN	TMX1_HUMAN	RD23B_HUMAN
SAR1A_HUMAN	RN114_HUMAN	TMX3_HUMAN	RECQ1_HUMAN
SARNP_HUMAN	RNPS1_HUMAN	TNR6A_HUMAN	RED_HUMAN
SART3_HUMAN	RO60_HUMAN	TOIP1_HUMAN	REEP3_HUMAN
SBDS_HUMAN	ROA0_HUMAN	TOM34_HUMAN	REEP5_HUMAN
SC11A_HUMAN	ROA1_HUMAN	TOM40_HUMAN	RENT1_HUMAN
SC22B_HUMAN	ROA2_HUMAN	TOP1_HUMAN	RER1_HUMAN
SC31A_HUMAN	ROA3_HUMAN	TOR1A_HUMAN	RETST_HUMAN
SC61B_HUMAN	ROAA_HUMAN	TOR1B_HUMAN	RFA2_HUMAN
SC61G_HUMAN	ROCK1_HUMAN	TOR2A_HUMAN	RFC2_HUMAN
SCAM3_HUMAN	ROCK2_HUMAN	TOR3A_HUMAN	RFC4_HUMAN
SCMC1_HUMAN	RPB11_HUMAN	TPD54_HUMAN	RFC5_HUMAN
SCOT1_HUMAN	RPB2_HUMAN	TPIS_HUMAN	RFX1_HUMAN
SCPDL_HUMAN	RPC9_HUMAN	TPM1_HUMAN	RGS10_HUMAN
SCRN1_HUMAN	RPF2_HUMAN	TPM3_HUMAN	RHG17_HUMAN
SDCB1_HUMAN	RPN1_HUMAN	TPM4_HUMAN	RHOA_HUMAN
SDF2_HUMAN	RPN2_HUMAN	TPR_HUMAN	RHOG_HUMAN
SDHA_HUMAN	RPR1B_HUMAN	TR150_HUMAN	RIC8A_HUMAN
SDHB_HUMAN	RRAGB_HUMAN	TRAF1_HUMAN	RIFK_HUMAN
SEC62_HUMAN	RRBP1_HUMAN	TRAM1_HUMAN	RINI_HUMAN
SELB_HUMAN	RRP1_HUMAN	TRAP1_HUMAN	RIOK2_HUMAN
SEM3A_HUMAN	RRP12_HUMAN	TRI25_HUMAN	RIR1_HUMAN
SEM3C_HUMAN	RRP1B_HUMAN	TRI69_HUMAN	RISC_HUMAN
SEPT2_HUMAN	RRP44_HUMAN	TRIPC_HUMAN	RL10_HUMAN
SEPT7_HUMAN	RRP5_HUMAN	TRPV4_HUMAN	RL10A_HUMAN
SEPT9_HUMAN	RRS1_HUMAN	TRUA_HUMAN	RL11_HUMAN
SERA_HUMAN	RS10_HUMAN	TRXR1_HUMAN	RL12_HUMAN
SERC_HUMAN	RS11_HUMAN	TSR1_HUMAN	RL13_HUMAN
SERP1_HUMAN	RS12_HUMAN	TTC18_HUMAN	RL13A_HUMAN
SERPH_HUMAN	RS13_HUMAN	TTL_HUMAN	RL14_HUMAN
SET_HUMAN	RS14_HUMAN	TTL12_HUMAN	RL15_HUMAN
SF01_HUMAN	RS15_HUMAN	TWF2_HUMAN	RL17_HUMAN
SF3A1_HUMAN	RS15A_HUMAN	TXD17_HUMAN	RL18_HUMAN
SF3A2_HUMAN	RS16_HUMAN	TXLNA_HUMAN	RL18A_HUMAN
SF3A3_HUMAN	RS17_HUMAN	TXND5_HUMAN	RL19_HUMAN
SF3B1_HUMAN	RS18_HUMAN	TXTP_HUMAN	RL1D1_HUMAN
SF3B2_HUMAN	RS19_HUMAN	TYB10_HUMAN	RL21_HUMAN
SF3B3_HUMAN	RS2_HUMAN	TYY1_HUMAN	RL22_HUMAN
SF3B6_HUMAN	RS20_HUMAN	U2AF1_HUMAN	RL22L_HUMAN
SFPQ_HUMAN	RS21_HUMAN	U2AF2_HUMAN	RL23_HUMAN
SFXN1_HUMAN	RS23_HUMAN	U520_HUMAN	RL23A_HUMAN
SFXN3_HUMAN	RS24_HUMAN	U5S1_HUMAN	RL24_HUMAN
SH3G1_HUMAN	RS25_HUMAN	UB2D3_HUMAN	RL26_HUMAN
SH3K1_HUMAN	RS26_HUMAN	UB2L3_HUMAN	RL27_HUMAN
SH3L3_HUMAN	RS27_HUMAN	UBA1_HUMAN	RL27A_HUMAN
SHC1_HUMAN	RS27A_HUMAN	UBA5_HUMAN	RL28_HUMAN
SIAS_HUMAN	RS28_HUMAN	UBA6_HUMAN	RL29_HUMAN
SIL1_HUMAN	RS29_HUMAN	UBC12_HUMAN	RL3_HUMAN
SK2L2_HUMAN	RS3_HUMAN	UBC9_HUMAN	RL30_HUMAN
SKIV2_HUMAN	RS30_HUMAN	UBE2N_HUMAN	RL31_HUMAN
SKP1_HUMAN	RS3A_HUMAN	UBP2L_HUMAN	RL32_HUMAN
SLIRP_HUMAN	RS4X_HUMAN	UBP5_HUMAN	RL34_HUMAN
SLK_HUMAN	RS5_HUMAN	UBQL1_HUMAN	RL35_HUMAN
SLN11_HUMAN	RS6_HUMAN	UCRIL_HUMAN	RL35A_HUMAN
SLTM_HUMAN	RS7_HUMAN	UGDH_HUMAN	RL36_HUMAN
SMAD2_HUMAN	RS8_HUMAN	UGGG1_HUMAN	RL36A_HUMAN
SMAP_HUMAN	RS9_HUMAN	UGPA_HUMAN	RL36L_HUMAN
SMC1A_HUMAN	RSMB_HUMAN	ULK3_HUMAN	RL37_HUMAN
SMC2_HUMAN	RSSA_HUMAN	UPP1_HUMAN	RL37A_HUMAN
SMC3_HUMAN	RSU1_HUMAN	URP2_HUMAN	RL37L_HUMAN
SMC4_HUMAN	RT07_HUMAN	VAMP2_HUMAN	RL38_HUMAN
SMCA5_HUMAN	RT09_HUMAN	VAPA_HUMAN	RL39_HUMAN
SMD1_HUMAN	RT11_HUMAN	VAPB_HUMAN	RL3L_HUMAN
SMD2_HUMAN	RT12_HUMAN	VASP_HUMAN	RL4_HUMAN
SMD3_HUMAN	RT14_HUMAN	VAT1L_HUMAN	RL40_HUMAN
SMG1_HUMAN	RT15_HUMAN	VATB2_HUMAN	RL5_HUMAN
SMN_HUMAN	RT17_HUMAN	VATG1_HUMAN	RL6_HUMAN
SMRC1_HUMAN	RT18A_HUMAN	VDAC1_HUMAN	RL7_HUMAN
SMU1_HUMAN	RT18B_HUMAN	VDAC2_HUMAN	RL7A_HUMAN
SND1_HUMAN	RT18C_HUMAN	VDAC3_HUMAN	RL7L_HUMAN
SNRPA_HUMAN	RT21_HUMAN	VIGLN_HUMAN	RL8_HUMAN
SNX2_HUMAN	RT22_HUMAN	VIME_HUMAN	RL9_HUMAN
SNX3_HUMAN	RT23_HUMAN	VINC_HUMAN	RLA0_HUMAN
SNX5_HUMAN	RT29_HUMAN	VP13B_HUMAN	RLA1_HUMAN
SNX6_HUMAN	RT31_HUMAN	VPS29_HUMAN	RLA2_HUMAN
SOAT1_HUMAN	RT33_HUMAN	VPS35_HUMAN	RLP24_HUMAN
SODC_HUMAN	RT35_HUMAN	VPS4B_HUMAN	RM09_HUMAN
SORCN_HUMAN	RTCB_HUMAN	VWA8_HUMAN	RM11_HUMAN
SOX10_HUMAN	RTF1_HUMAN	WDR1_HUMAN	RM12_HUMAN
SP16H_HUMAN	RTF2_HUMAN	WDR87_HUMAN	RM14_HUMAN
SPB1_HUMAN	RTN3_HUMAN	WFS1_HUMAN	RM28_HUMAN
SPB6_HUMAN	RTN4_HUMAN	WNK1_HUMAN	RM30_HUMAN
SPCS2_HUMAN	RU17_HUMAN	XPO1_HUMAN	RM32_HUMAN
SPCS3_HUMAN	RU1C_HUMAN	XPO2_HUMAN	RM33_HUMAN
SPEE_HUMAN	RU2A_HUMAN	XPOT_HUMAN	RM39_HUMAN
SPRTN_HUMAN	RU2B_HUMAN	XRCC5_HUMAN	RM40_HUMAN
SPSY_HUMAN	RUVB1_HUMAN	XRCC6_HUMAN	RM45_HUMAN
SPTB2_HUMAN	RUVB2_HUMAN	XYLK_HUMAN	RM47_HUMAN
SPTN1_HUMAN	RUXE_HUMAN	YBOX1_HUMAN	RM54_HUMAN
SPTN2_HUMAN	RUXF_HUMAN	YKT6_HUMAN	RMD1_HUMAN
SPTN5_HUMAN	RUXG_HUMAN	YMEL1_HUMAN	RMXL1_HUMAN
SQSTM_HUMAN	RYBP_HUMAN	YTHD3_HUMAN	RN114_HUMAN
SR140_HUMAN	S100B_HUMAN	ZC3HF_HUMAN	RN214_HUMAN
SRC_HUMAN	S10A1_HUMAN	ZCCHV_HUMAN	RNPS1_HUMAN
SRC8_HUMAN	S10A6_HUMAN	ZFP62_HUMAN	RO60_HUMAN
SRP09_HUMAN	S10AA_HUMAN	ZN207_HUMAN	ROA0_HUMAN
SRP14_HUMAN	S10AD_HUMAN	ZN365_HUMAN	ROA1_HUMAN
SRP54_HUMAN	S10AG_HUMAN	ZN706_HUMAN	ROA2_HUMAN
SRP72_HUMAN	S12A4_HUMAN	ZRAB2_HUMAN	ROA3_HUMAN
SRPK2_HUMAN	S12A6_HUMAN	ZYX_HUMAN	ROAA_HUMAN
SRPR_HUMAN	S35B2_HUMAN		ROCK1_HUMAN
SRPRB_HUMAN	S4A7_HUMAN		ROCK2_HUMAN
SRRM1_HUMAN	S61A1_HUMAN		RPA2_HUMAN
SRRT_HUMAN	SAC2_HUMAN		RPB2_HUMAN
SRS10_HUMAN	SAE2_HUMAN		RPC1_HUMAN
SRSF1_HUMAN	SAFB1_HUMAN		RPC9_HUMAN
SRSF2_HUMAN	SAFB2_HUMAN		RPN1_HUMAN
SRSF3_HUMAN	SAHH_HUMAN		RPN2_HUMAN
SRSF4_HUMAN	SAHH3_HUMAN		RPR1B_HUMAN
SRSF5_HUMAN	SAM50_HUMAN		RRBP1_HUMAN
SRSF6_HUMAN	SAP_HUMAN		RRP1_HUMAN
SRSF7_HUMAN	SAP18_HUMAN		RRP12_HUMAN
SSBP_HUMAN	SAP3_HUMAN		RRP15_HUMAN
SSRB_HUMAN	SAR1A_HUMAN		RRP1B_HUMAN
SSRD_HUMAN	SARNP_HUMAN		RRP5_HUMAN
SSRG_HUMAN	SBDS_HUMAN		RRP7A_HUMAN
SSRP1_HUMAN	SC11A_HUMAN		RRS1_HUMAN
ST1A3_HUMAN	SC22B_HUMAN		RS10_HUMAN
ST38L_HUMAN	SC61B_HUMAN		RS11_HUMAN
STAC3_HUMAN	SC61G_HUMAN		RS12_HUMAN
STAG2_HUMAN	SCAM3_HUMAN		RS13_HUMAN
STAT1_HUMAN	SCMC1_HUMAN		RS14_HUMAN
STAT3_HUMAN	SCO1_HUMAN		RS15_HUMAN
STAU1_HUMAN	SCOT1_HUMAN		RS15A_HUMAN
STIP1_HUMAN	SCPDL_HUMAN		RS16_HUMAN
STK10_HUMAN	SCRB2_HUMAN		RS17_HUMAN
STK11_HUMAN	SDCB1_HUMAN		RS18_HUMAN
STK24_HUMAN	SDF2L_HUMAN		RS19_HUMAN
STK3_HUMAN	SDHA_HUMAN		RS2_HUMAN
STK38_HUMAN	SDHB_HUMAN		RS20_HUMAN
STK4_HUMAN	SDPR_HUMAN		RS21_HUMAN
STML2_HUMAN	SEC62_HUMAN		RS23_HUMAN
STMN1_HUMAN	SEM3A_HUMAN		RS24_HUMAN
STRAA_HUMAN	SEP11_HUMAN		RS25_HUMAN
STRBP_HUMAN	SEPT2_HUMAN		RS26_HUMAN
STT3A_HUMAN	SEPT7_HUMAN		RS27_HUMAN
STT3B_HUMAN	SEPT9_HUMAN		RS27A_HUMAN
STXB6_HUMAN	SERA_HUMAN		RS28_HUMAN
SUCA_HUMAN	SERC_HUMAN		RS29_HUMAN
SUCB1_HUMAN	SERP1_HUMAN		RS3_HUMAN
SUMO1_HUMAN	SERPH_HUMAN		RS30_HUMAN
SUMO2_HUMAN	SET_HUMAN		RS3A_HUMAN
SURF4_HUMAN	SF01_HUMAN		RS4X_HUMAN
SURF6_HUMAN	SF3A1_HUMAN		RS4Y1_HUMAN
SWP70_HUMAN	SF3A2_HUMAN		RS5_HUMAN
SYAC_HUMAN	SF3A3_HUMAN		RS6_HUMAN
SYCC_HUMAN	SF3B1_HUMAN		RS7_HUMAN
SYDC_HUMAN	SF3B2_HUMAN		RS8_HUMAN
SYDM_HUMAN	SF3B3_HUMAN		RS9_HUMAN
SYEP_HUMAN	SF3B6_HUMAN		RSMB_HUMAN
SYFB_HUMAN	SFPQ_HUMAN		RSSA_HUMAN
SYG_HUMAN	SFXN1_HUMAN		RT17_HUMAN
SYHC_HUMAN	SFXN3_HUMAN		RT18B_HUMAN
SYIC_HUMAN	SGTA_HUMAN		RT29_HUMAN
SYIM_HUMAN	SH3K1_HUMAN		RT36_HUMAN
SYJ2B_HUMAN	SH3L3_HUMAN		RTCB_HUMAN
SYK_HUMAN	SHC1_HUMAN		RTN4_HUMAN
SYLC_HUMAN	SHIP2_HUMAN		RU17_HUMAN
SYMC_HUMAN	SHPS1_HUMAN		RU1C_HUMAN
SYNC_HUMAN	SIAS_HUMAN		RU2A_HUMAN
SYQ_HUMAN	SIAT1_HUMAN		RU2B_HUMAN
SYRC_HUMAN	SIL1_HUMAN		RUVB1_HUMAN
SYSC_HUMAN	SIN3A_HUMAN		RUVB2_HUMAN
SYSM_HUMAN	SK2L2_HUMAN		RUXE_HUMAN
SYT10_HUMAN	SKIV2_HUMAN		RUXG_HUMAN
SYTC_HUMAN	SLIRP_HUMAN		S100B_HUMAN
SYVC_HUMAN	SLK_HUMAN		S10A1_HUMAN
SYWC_HUMAN	SMAP_HUMAN		S10A4_HUMAN
SYWM_HUMAN	SMC1A_HUMAN		S10A6_HUMAN
SYYC_HUMAN	SMC1B_HUMAN		S10AA_HUMAN
T126A_HUMAN	SMC3_HUMAN		S10AD_HUMAN
T2FA_HUMAN	SMC4_HUMAN		S10AG_HUMAN
TADBP_HUMAN	SMCA1_HUMAN		S12A4_HUMAN
TAGL2_HUMAN	SMCA5_HUMAN		S12A6_HUMAN
TALDO_HUMAN	SMD1_HUMAN		S1PR2_HUMAN
TAM41_HUMAN	SMD2_HUMAN		S23IP_HUMAN
TAOK1_HUMAN	SMD3_HUMAN		S26A2_HUMAN
TAOK2_HUMAN	SMG1_HUMAN		S35B2_HUMAN
TAOK3_HUMAN	SMN_HUMAN		S61A1_HUMAN
TATD1_HUMAN	SMRC1_HUMAN		SAC1_HUMAN
TBB3_HUMAN	SMRC2_HUMAN		SAE1_HUMAN
TBB4B_HUMAN	SMRD2_HUMAN		SAE2_HUMAN
TBB5_HUMAN	SND1_HUMAN		SAFB2_HUMAN
TBB6_HUMAN	SNIP1_HUMAN		SAHH_HUMAN
TBB8_HUMAN	SNR40_HUMAN		SAHH3_HUMAN
TBC24_HUMAN	SNRPA_HUMAN		SAM50_HUMAN
TBCA_HUMAN	SNTB1_HUMAN		SAP_HUMAN
TBG1_HUMAN	SNUT2_HUMAN		SAP3_HUMAN
TBK1_HUMAN	SNW1_HUMAN		SAR1A_HUMAN
TCEA1_HUMAN	SNX1_HUMAN		SARNP_HUMAN
TCOF_HUMAN	SNX2_HUMAN		SBDS_HUMAN
TCP4_HUMAN	SNX3_HUMAN		SC22B_HUMAN
TCPA_HUMAN	SNX5_HUMAN		SC23A_HUMAN
TCPB_HUMAN	SNX6_HUMAN		SC31A_HUMAN
TCPD_HUMAN	SNX9_HUMAN		SC61B_HUMAN
TCPE_HUMAN	SOAT1_HUMAN		SC61G_HUMAN
TCPG_HUMAN	SODC_HUMAN		SCAM3_HUMAN
TCPH_HUMAN	SORCN_HUMAN		SCMC1_HUMAN
TCPQ_HUMAN	SOX10_HUMAN		SCO1_HUMAN
TCPZ_HUMAN	SP1_HUMAN		SCPDL_HUMAN
TCRG1_HUMAN	SP100_HUMAN		SCRB2_HUMAN
TCTP_HUMAN	SP16H_HUMAN		SCRN1_HUMAN
TDRD7_HUMAN	SPB1_HUMAN		SDCB1_HUMAN
TEBP_HUMAN	SPB6_HUMAN		SDF2_HUMAN
TECR_HUMAN	SPCS1_HUMAN		SDF2L_HUMAN
TERA_HUMAN	SPCS2_HUMAN		SDHA_HUMAN
TES_HUMAN	SPCS3_HUMAN		SDHB_HUMAN
TET1_HUMAN	SPEE_HUMAN		SEC62_HUMAN
TEX10_HUMAN	SPF27_HUMAN		SEC63_HUMAN
TF65_HUMAN	SPP2A_HUMAN		SEM3A_HUMAN
TFAM_HUMAN	SPRE_HUMAN		SEP10_HUMAN
TFG_HUMAN	SPSY_HUMAN		SEP11_HUMAN
TFR1_HUMAN	SPTB1_HUMAN		SEPT2_HUMAN
TGM2_HUMAN	SPTB2_HUMAN		SEPT7_HUMAN
THIL_HUMAN	SPTN1_HUMAN		SEPT8_HUMAN
THIO_HUMAN	SQSTM_HUMAN		SEPT9_HUMAN
THOC4_HUMAN	SR140_HUMAN		SERA_HUMAN
THOC7_HUMAN	SRBS2_HUMAN		SERC_HUMAN
THYN1_HUMAN	SRC8_HUMAN		SERF2_HUMAN
TIA1_HUMAN	SRFB1_HUMAN		SERP1_HUMAN
TIAR_HUMAN	SRP09_HUMAN		SERPH_HUMAN
TIF1B_HUMAN	SRP14_HUMAN		SET_HUMAN
TIM10_HUMAN	SRP68_HUMAN		SF01_HUMAN
TIM13_HUMAN	SRPK1_HUMAN		SF3A1_HUMAN
TIM44_HUMAN	SRPK2_HUMAN		SF3A2_HUMAN
TIM9_HUMAN	SRPRB_HUMAN		SF3A3_HUMAN
TKT_HUMAN	SRRM1_HUMAN		SF3B1_HUMAN
TLK2_HUMAN	SRRT_HUMAN		SF3B2_HUMAN
TLN1_HUMAN	SRS10_HUMAN		SF3B3_HUMAN
TM109_HUMAN	SRS11_HUMAN		SF3B6_HUMAN
TM165_HUMAN	SRSF1_HUMAN		SFPQ_HUMAN
TM9S2_HUMAN	SRSF2_HUMAN		SFRP1_HUMAN
TM9S3_HUMAN	SRSF3_HUMAN		SFXN3_HUMAN
TMA16_HUMAN	SRSF4_HUMAN		SGTA_HUMAN
TMA7_HUMAN	SRSF5_HUMAN		SH3G1_HUMAN
TMCO1_HUMAN	SRSF6_HUMAN		SH3L3_HUMAN
TMED4_HUMAN	SRSF7_HUMAN		SHPS1_HUMAN
TMED9_HUMAN	SRSF9_HUMAN		SHRM2_HUMAN
TMEDA_HUMAN	SSBP_HUMAN		SIAS_HUMAN
TMX1_HUMAN	SSDH_HUMAN		SIAT1_HUMAN
TMX3_HUMAN	SSRA_HUMAN		SIL1_HUMAN
TNIK_HUMAN	SSRB_HUMAN		SK2L2_HUMAN
TOIP1_HUMAN	SSRD_HUMAN		SKIV2_HUMAN
TOM20_HUMAN	SSRG_HUMAN		SKP1_HUMAN
TOM34_HUMAN	SSRP1_HUMAN		SLIRP_HUMAN
TOM40_HUMAN	ST38L_HUMAN		SLK_HUMAN
TOM70_HUMAN	STAC3_HUMAN		SLN11_HUMAN
TOP1_HUMAN	STAT1_HUMAN		SMAD2_HUMAN
TOR1A_HUMAN	STAU1_HUMAN		SMAD4_HUMAN
TOR1B_HUMAN	STIP1_HUMAN		SMAP_HUMAN
TOR2A_HUMAN	STK10_HUMAN		SMC1A_HUMAN
TOR3A_HUMAN	STK11_HUMAN		SMC2_HUMAN
TPD52_HUMAN	STK24_HUMAN		SMC3_HUMAN
TPD54_HUMAN	STK25_HUMAN		SMC4_HUMAN
TPD55_HUMAN	STK38_HUMAN		SMCA4_HUMAN
TPIS_HUMAN	STK39_HUMAN		SMCA5_HUMAN
TPM3_HUMAN	STK4_HUMAN		SMCE1_HUMAN
TPM4_HUMAN	STML2_HUMAN		SMD1_HUMAN
TPR_HUMAN	STMN1_HUMAN		SMD2_HUMAN
TR150_HUMAN	STMN2_HUMAN		SMD3_HUMAN
TRA2B_HUMAN	STOM_HUMAN		SMG1_HUMAN
TRAP1_HUMAN	STRAA_HUMAN		SMN_HUMAN
TRFM_HUMAN	STRAP_HUMAN		SMRC1_HUMAN
TRI25_HUMAN	STRBP_HUMAN		SND1_HUMAN
TRM6_HUMAN	STT3A_HUMAN		SNR40_HUMAN
TRUA_HUMAN	STX11_HUMAN		SNRPA_HUMAN
TRXR1_HUMAN	STX3_HUMAN		SNUT2_HUMAN
TS101_HUMAN	STX7_HUMAN		SNW1_HUMAN
TSN_HUMAN	STXB1_HUMAN		SNX3_HUMAN
TSR1_HUMAN	STXB6_HUMAN		SNX6_HUMAN
TSSC4_HUMAN	SUCA_HUMAN		SODC_HUMAN
TT21A_HUMAN	SUCB1_HUMAN		SORCN_HUMAN
TTC17_HUMAN	SUCB2_HUMAN		SOS2_HUMAN
TTL12_HUMAN	SUMO1_HUMAN		SOX10_HUMAN
TWF1_HUMAN	SUMO2_HUMAN		SP100_HUMAN
TWF2_HUMAN	SV2A_HUMAN		SP16H_HUMAN
TXD12_HUMAN	SV2C_HUMAN		SPB1_HUMAN
TXD17_HUMAN	SV421_HUMAN		SPB6_HUMAN
TXLNA_HUMAN	SYAC_HUMAN		SPCS2_HUMAN
TXND5_HUMAN	SYCP1_HUMAN		SPCS3_HUMAN
TXNIP_HUMAN	SYEP_HUMAN		SPD2B_HUMAN
TXTP_HUMAN	SYFA_HUMAN		SPEE_HUMAN
TYB4_HUMAN	SYFB_HUMAN		SPF30_HUMAN
U2AF2_HUMAN	SYG_HUMAN		SPRC_HUMAN
U3IP2_HUMAN	SYHC_HUMAN		SPRE_HUMAN
U520_HUMAN	SYIC_HUMAN		SPT5H_HUMAN
U5S1_HUMAN	SYIM_HUMAN		SPTA1_HUMAN
UAP1_HUMAN	SYJ2B_HUMAN		SPTB2_HUMAN
UB2L3_HUMAN	SYK_HUMAN		SPTN1_HUMAN
UB2V1_HUMAN	SYLC_HUMAN		SPTN5_HUMAN
UBA1_HUMAN	SYMC_HUMAN		SPY4_HUMAN
UBA3_HUMAN	SYNC_HUMAN		SQSTM_HUMAN
UBA5_HUMAN	SYNM_HUMAN		SR140_HUMAN
UBA6_HUMAN	SYNPO_HUMAN		SRBS2_HUMAN
UBC12_HUMAN	SYQ_HUMAN		SRC8_HUMAN
UBC9_HUMAN	SYRC_HUMAN		SRGP2_HUMAN
UBCP1_HUMAN	SYSC_HUMAN		SRP09_HUMAN
UBE2K_HUMAN	SYSM_HUMAN		SRP14_HUMAN
UBE2N_HUMAN	SYT10_HUMAN		SRP54_HUMAN
UBE2Z_HUMAN	SYTC_HUMAN		SRP72_HUMAN
UBP14_HUMAN	SYTC2_HUMAN		SRPK1_HUMAN
UBP2L_HUMAN	SYTL2_HUMAN		SRPK2_HUMAN
UBP5_HUMAN	SYUA_HUMAN		SRPR_HUMAN
UBP7_HUMAN	SYVC_HUMAN		SRPRB_HUMAN
UBQL1_HUMAN	SYWC_HUMAN		SRRM1_HUMAN
UBR4_HUMAN	SYWM_HUMAN		SRRT_HUMAN
UBXN1_HUMAN	SYYC_HUMAN		SRSF1_HUMAN
UCRIL_HUMAN	SYYM_HUMAN		SRSF2_HUMAN
UFD1_HUMAN	T126A_HUMAN		SRSF3_HUMAN
UFO_HUMAN	T2FB_HUMAN		SRSF4_HUMAN
UGGG1_HUMAN	TACO1_HUMAN		SRSF5_HUMAN
UGPA_HUMAN	TADBP_HUMAN		SRSF6_HUMAN
ULA1_HUMAN	TAF1A_HUMAN		SRSF7_HUMAN
ULK3_HUMAN	TAGL_HUMAN		SRSF9_HUMAN
UNC79_HUMAN	TAGL2_HUMAN		SSBP_HUMAN
UQCC1_HUMAN	TALDO_HUMAN		SSDH_HUMAN
VAMP2_HUMAN	TAOK2_HUMAN		SSF1_HUMAN
VAPA_HUMAN	TAOK3_HUMAN		SSRA_HUMAN
VAPB_HUMAN	TARA_HUMAN		SSRB_HUMAN
VASP_HUMAN	TATD1_HUMAN		SSRD_HUMAN
VAT1_HUMAN	TBA1B_HUMAN		SSRG_HUMAN
VATE1_HUMAN	TBA3C_HUMAN		SSRP1_HUMAN
VATG1_HUMAN	TBB2A_HUMAN		SSXT_HUMAN
VCX1_HUMAN	TBB3_HUMAN		ST38L_HUMAN
VDAC1_HUMAN	TBB4A_HUMAN		STAC3_HUMAN
VDAC2_HUMAN	TBB4B_HUMAN		STAT1_HUMAN
VDAC3_HUMAN	TBB5_HUMAN		STAT3_HUMAN
VIGLN_HUMAN	TBB8_HUMAN		STAT6_HUMAN
VIME_HUMAN	TBCA_HUMAN		STAU1_HUMAN
VINC_HUMAN	TBCB_HUMAN		STIM1_HUMAN
VPS29_HUMAN	TBCD4_HUMAN		STIP1_HUMAN
VPS35_HUMAN	TBRG4_HUMAN		STK10_HUMAN
VPS45_HUMAN	TCEA1_HUMAN		STK11_HUMAN
VPS4A_HUMAN	TCOF_HUMAN		STK24_HUMAN
VRK1_HUMAN	TCP4_HUMAN		STK3_HUMAN
VWA3B_HUMAN	TCPA_HUMAN		STK38_HUMAN
VWA8_HUMAN	TCPB_HUMAN		STK39_HUMAN
WBP2_HUMAN	TCPD_HUMAN		STK4_HUMAN
WDR1_HUMAN	TCPE_HUMAN		STML2_HUMAN
WDR43_HUMAN	TCPG_HUMAN		STMN1_HUMAN
WFS1_HUMAN	TCPH_HUMAN		STMN2_HUMAN
WNK1_HUMAN	TCPQ_HUMAN		STRAA_HUMAN
XPO1_HUMAN	TCPZ_HUMAN		STRAP_HUMAN
XPO2_HUMAN	TCTP_HUMAN		STRBP_HUMAN
XPP1_HUMAN	TDIF1_HUMAN		STRN_HUMAN
XRCC4_HUMAN	TEBP_HUMAN		STT3A_HUMAN
XRCC5_HUMAN	TECR_HUMAN		STT3B_HUMAN
XRCC6_HUMAN	TERA_HUMAN		STXB6_HUMAN
XRN2_HUMAN	TES_HUMAN		SUCA_HUMAN
XYLK_HUMAN	TEX10_HUMAN		SUCB2_HUMAN
YBOX1_HUMAN	TF2B_HUMAN		SUMF2_HUMAN
YBOX3_HUMAN	TFAM_HUMAN		SUMO1_HUMAN
YMEL1_HUMAN	TFG_HUMAN		SUMO2_HUMAN
ZC3HE_HUMAN	TFR1_HUMAN		SUMO4_HUMAN
ZCCHV_HUMAN	THEM4_HUMAN		SUN1_HUMAN
ZDHC2_HUMAN	THIC_HUMAN		SUN2_HUMAN
ZFR_HUMAN	THIK_HUMAN		SURF4_HUMAN
ZMY11_HUMAN	THIL_HUMAN		SURF6_HUMAN
ZN207_HUMAN	THIM_HUMAN		SWP70_HUMAN
ZN326_HUMAN	THIO_HUMAN		SYAC_HUMAN
ZN799_HUMAN	THOC4_HUMAN		SYAP1_HUMAN
ZNFX1_HUMAN	THOC7_HUMAN		SYCC_HUMAN
ZPR1_HUMAN	THTR_HUMAN		SYCP1_HUMAN
ZRAB2_HUMAN	THYN1_HUMAN		SYDC_HUMAN
ZSWM3_HUMAN	TIAR_HUMAN		SYDE2_HUMAN
ZYX_HUMAN	TIE1_HUMAN		SYDM_HUMAN
	TIF1B_HUMAN		SYEP_HUMAN
	TIM44_HUMAN		SYFA_HUMAN
	TIM50_HUMAN		SYFB_HUMAN
	TITIN_HUMAN		SYG_HUMAN
	TKT_HUMAN		SYHC_HUMAN
	TLK1_HUMAN		SYIC_HUMAN
	TLK2_HUMAN		SYIM_HUMAN
	TLN1_HUMAN		SYJ2B_HUMAN
	TM109_HUMAN		SYK_HUMAN
	TM201_HUMAN		SYLC_HUMAN
	TM9S2_HUMAN		SYNC_HUMAN
	TMA7_HUMAN		SYNEM_HUMAN
	TMCO1_HUMAN		SYQ_HUMAN
	TMED9_HUMAN		SYRC_HUMAN
	TMEDA_HUMAN		SYSC_HUMAN
	TMF1_HUMAN		SYSM_HUMAN
	TMM43_HUMAN		SYT10_HUMAN
	TMM97_HUMAN		SYTC_HUMAN
	TMOD3_HUMAN		SYUA_HUMAN
	TMX1_HUMAN		SYVC_HUMAN
	TMX3_HUMAN		SYVN1_HUMAN
	TNPO1_HUMAN		SYWC_HUMAN
	TOIP1_HUMAN		SYYC_HUMAN
	TOLIP_HUMAN		T161B_HUMAN
	TOM70_HUMAN		T2FA_HUMAN
	TOP1_HUMAN		T2FB_HUMAN
	TOP2B_HUMAN		TADBP_HUMAN
	TOR1A_HUMAN		TAGL_HUMAN
	TOR1B_HUMAN		TAGL2_HUMAN
	TOR3A_HUMAN		TALDO_HUMAN
	TPD52_HUMAN		TAOK1_HUMAN
	TPD54_HUMAN		TAOK2_HUMAN
	TPD55_HUMAN		TAOK3_HUMAN
	TPIS_HUMAN		TBA1C_HUMAN
	TPM1_HUMAN		TBB2A_HUMAN
	TPM3_HUMAN		TBB2B_HUMAN
	TPM4_HUMAN		TBB3_HUMAN
	TPMT_HUMAN		TBB4A_HUMAN
	TPP1_HUMAN		TBB4B_HUMAN
	TPR_HUMAN		TBB5_HUMAN
	TR150_HUMAN		TBB6_HUMAN
	TRA2A_HUMAN		TBB8_HUMAN
	TRAP1_HUMAN		TBC15_HUMAN
	TRI25_HUMAN		TBCA_HUMAN
	TRIM4_HUMAN		TBCB_HUMAN
	TRPM7_HUMAN		TBCD4_HUMAN
	TRUA_HUMAN		TBG1_HUMAN
	TRXR1_HUMAN		TBK1_HUMAN
	TSN_HUMAN		TBL2_HUMAN
	TSNAX_HUMAN		TBRG4_HUMAN
	TSR1_HUMAN		TCEA1_HUMAN
	TTC17_HUMAN		TCOF_HUMAN
	TTL_HUMAN		TCP4_HUMAN
	TTL12_HUMAN		TCPA_HUMAN
	TWF2_HUMAN		TCPB_HUMAN
	TXD12_HUMAN		TCPD_HUMAN
	TXD17_HUMAN		TCPE_HUMAN
	TXND5_HUMAN		TCPG_HUMAN
	TXNL1_HUMAN		TCPH_HUMAN
	TXTP_HUMAN		TCPQ_HUMAN
	TYB10_HUMAN		TCPZ_HUMAN
	TYB4_HUMAN		TCRG1_HUMAN
	TYRP2_HUMAN		TCTP_HUMAN
	U2AF1_HUMAN		TEBP_HUMAN
	U2AF2_HUMAN		TECR_HUMAN
	U520_HUMAN		TENS3_HUMAN
	U5S1_HUMAN		TERA_HUMAN
	UB2L3_HUMAN		TES_HUMAN
	UBA1_HUMAN		TEX10_HUMAN
	UBA3_HUMAN		TFG_HUMAN
	UBA5_HUMAN		TFR1_HUMAN
	UBA6_HUMAN		TGM2_HUMAN
	UBC12_HUMAN		THIC_HUMAN
	UBC9_HUMAN		THIL_HUMAN
	UBE2N_HUMAN		THIM_HUMAN
	UBE2Z_HUMAN		THIO_HUMAN
	UBF1_HUMAN		THIOM_HUMAN
	UBFD1_HUMAN		THOC4_HUMAN
	UBP14_HUMAN		THOC7_HUMAN
	UBP5_HUMAN		THOP1_HUMAN
	UBP7_HUMAN		TIA1_HUMAN
	UFD1_HUMAN		TIAM2_HUMAN
	UGDH_HUMAN		TIAR_HUMAN
	UGGG1_HUMAN		TIE1_HUMAN
	UGPA_HUMAN		TIF1B_HUMAN
	ULA1_HUMAN		TIM13_HUMAN
	ULK3_HUMAN		TIM44_HUMAN
	UNC79_HUMAN		TIM50_HUMAN
	UPP1_HUMAN		TIPRL_HUMAN
	USF2_HUMAN		TKT_HUMAN
	USMG5_HUMAN		TLK1_HUMAN
	USO1_HUMAN		TLK2_HUMAN
	UTP11_HUMAN		TLN1_HUMAN
	VAMP2_HUMAN		TLN2_HUMAN
	VAPA_HUMAN		TM109_HUMAN
	VAPB_HUMAN		TM165_HUMAN
	VASP_HUMAN		TM214_HUMAN
	VAT1_HUMAN		TM9S2_HUMAN
	VATA_HUMAN		TM9S4_HUMAN
	VATB2_HUMAN		TMA7_HUMAN
	VATC1_HUMAN		TMCO1_HUMAN
	VATE1_HUMAN		TMED4_HUMAN
	VATG1_HUMAN		TMED5_HUMAN
	VCAM1_HUMAN		TMED9_HUMAN
	VDAC1_HUMAN		TMEDA_HUMAN
	VDAC2_HUMAN		TMM33_HUMAN
	VDAC3_HUMAN		TMOD3_HUMAN
	VEGFC_HUMAN		TMX1_HUMAN
	VIGLN_HUMAN		TMX3_HUMAN
	VIME_HUMAN		TNIK_HUMAN
	VINC_HUMAN		TOIP1_HUMAN
	VKOR1_HUMAN		TOM34_HUMAN
	VP13B_HUMAN		TOM40_HUMAN
	VPP1_HUMAN		TOM5_HUMAN
	VPS29_HUMAN		TOM7_HUMAN
	VPS35_HUMAN		TOM70_HUMAN
	VWA8_HUMAN		TOP1_HUMAN
	WBP2_HUMAN		TOP1M_HUMAN
	WDR1_HUMAN		TOP2B_HUMAN
	WDR43_HUMAN		TOPK_HUMAN
	WDR82_HUMAN		TOR1A_HUMAN
	WFS1_HUMAN		TOR1B_HUMAN
	WNK4_HUMAN		TOR2A_HUMAN
	XCT_HUMAN		TOR3A_HUMAN
	XPC_HUMAN		TPD54_HUMAN
	XPO1_HUMAN		TPD55_HUMAN
	XPO2_HUMAN		TPIS_HUMAN
	XPP1_HUMAN		TPM1_HUMAN
	XRCC5_HUMAN		TPM3_HUMAN
	XRCC6_HUMAN		TPM4_HUMAN
	XRN2_HUMAN		TPMT_HUMAN
	YBOX1_HUMAN		TPP1_HUMAN
	YBOX3_HUMAN		TPR_HUMAN
	YKT6_HUMAN		TR150_HUMAN
	ZC21B_HUMAN		TRA2B_HUMAN
	ZCCHV_HUMAN		TRAP1_HUMAN
	ZN207_HUMAN		TRI25_HUMAN
	ZN285_HUMAN		TRIM2_HUMAN
	ZN326_HUMAN		TRIM9_HUMAN
	ZN425_HUMAN		TRIP6_HUMAN
	ZN462_HUMAN		TRIPC_HUMAN
	ZNF26_HUMAN		TRIQK_HUMAN
	ZNFX1_HUMAN		TRUA_HUMAN
	ZRAB2_HUMAN		TRXR1_HUMAN
	ZSC29_HUMAN		TSN_HUMAN
	ZSWM3_HUMAN		TSR1_HUMAN
	ZYX_HUMAN		TSYL1_HUMAN
			TTC18_HUMAN
			TTL_HUMAN
			TTL12_HUMAN
			TWF2_HUMAN
			TXD12_HUMAN
			TXD17_HUMAN
			TXND5_HUMAN
			TXTP_HUMAN
			U2AF1_HUMAN
			U2AF2_HUMAN
			U520_HUMAN
			U5S1_HUMAN
			UB2G2_HUMAN
			UB2L3_HUMAN
			UB2V1_HUMAN
			UB2V2_HUMAN
			UBA1_HUMAN
			UBA3_HUMAN
			UBA5_HUMAN
			UBA6_HUMAN
			UBC12_HUMAN
			UBC9_HUMAN
			UBCP1_HUMAN
			UBE2N_HUMAN
			UBE2T_HUMAN
			UBE2Z_HUMAN
			UBE3C_HUMAN
			UBF1_HUMAN
			UBL4A_HUMAN
			UBP14_HUMAN
			UBP2L_HUMAN
			UBP5_HUMAN
			UBP7_HUMAN
			UBR4_HUMAN
			UBXN1_HUMAN
			UCRIL_HUMAN
			UFC1_HUMAN
			UFD1_HUMAN
			UGDH_HUMAN
			UGGG1_HUMAN
			UGPA_HUMAN
			ULA1_HUMAN
			ULK3_HUMAN
			UPP1_HUMAN
			USF2_HUMAN
			USMG5_HUMAN
			USO1_HUMAN
			UT14A_HUMAN
			VAMP2_HUMAN
			VAPA_HUMAN
			VAPB_HUMAN
			VASP_HUMAN
			VATA_HUMAN
			VATB2_HUMAN
			VATC1_HUMAN
			VATE1_HUMAN
			VATG1_HUMAN
			VCY1_HUMAN
			VDAC1_HUMAN
			VDAC2_HUMAN
			VDAC3_HUMAN
			VIGLN_HUMAN
			VIME_HUMAN
			VINC_HUMAN
			VP13B_HUMAN
			VPS29_HUMAN
			VPS35_HUMAN
			VPS45_HUMAN
			VPS4A_HUMAN
			VPS4B_HUMAN
			VPS72_HUMAN
			VTA1_HUMAN
			WBP11_HUMAN
			WDR1_HUMAN
			WDR74_HUMAN
			WDR82_HUMAN
			WFS1_HUMAN
			WNK1_HUMAN
			WNK4_HUMAN
			XPC_HUMAN
			XPO1_HUMAN
			XPO2_HUMAN
			XPO5_HUMAN
			XPOT_HUMAN
			XPP1_HUMAN
			XRCC1_HUMAN
			XRCC5_HUMAN
			XRCC6_HUMAN
			XRN2_HUMAN
			XYLK_HUMAN
			YBOX1_HUMAN
			YBOX3_HUMAN
			YIF1A_HUMAN
			YKT6_HUMAN
			YMEL1_HUMAN
			YTHD3_HUMAN
[truncated: 14 more rows]

## Sheet: Supp. Table 1B
Supplementary Table 1b. List of kinases (only leading protein shown) identified from database search of individual cell line models (Supplementary Figure S1B) with ABPP
A375	WM164	1205Lu	WM793
AAPK1_HUMAN	AAPK1_HUMAN	AAPK1_HUMAN	AAPK1_HUMAN
ABL2_HUMAN	ACVR1_HUMAN	ACVR1_HUMAN	ABL2_HUMAN
ACVR1_HUMAN	AKT1_HUMAN	ANPRB_HUMAN	AKT1_HUMAN
AKT1_HUMAN	AURKA_HUMAN	ATR_HUMAN	AKT3_HUMAN
ANKK1_HUMAN	BCKD_HUMAN	AURKA_HUMAN	ATR_HUMAN
ANPRB_HUMAN	CD11B_HUMAN	BRAF_HUMAN	AURKA_HUMAN
ATR_HUMAN	CDK12_HUMAN	BUB1_HUMAN	BCKD_HUMAN
AURKA_HUMAN	CDK14_HUMAN	CD11B_HUMAN	BMPR2_HUMAN
BCKD_HUMAN	CDK2_HUMAN	CDK1_HUMAN	BRAF_HUMAN
BRAF_HUMAN	CDK5_HUMAN	CDK14_HUMAN	CD11B_HUMAN
CD11B_HUMAN	CDK7_HUMAN	CDK19_HUMAN	CDK1_HUMAN
CDK1_HUMAN	CHK2_HUMAN	CDK2_HUMAN	CDK14_HUMAN
CDK14_HUMAN	CSK_HUMAN	CDK5_HUMAN	CDK2_HUMAN
CDK2_HUMAN	CSK21_HUMAN	CDK7_HUMAN	CDK20_HUMAN
CDK5_HUMAN	CSK22_HUMAN	CHK1_HUMAN	CDK5_HUMAN
CDK6_HUMAN	CSKP_HUMAN	CHK2_HUMAN	CDK7_HUMAN
CDK7_HUMAN	E2AK2_HUMAN	CSK_HUMAN	CHK1_HUMAN
CDK9_HUMAN	EGFR_HUMAN	CSK21_HUMAN	CSK_HUMAN
CHK1_HUMAN	EPHA2_HUMAN	CSK22_HUMAN	CSK21_HUMAN
CHK2_HUMAN	EPHA5_HUMAN	E2AK2_HUMAN	CSK22_HUMAN
CSK_HUMAN	FAK1_HUMAN	E2AK4_HUMAN	CSKP_HUMAN
CSK21_HUMAN	FYN_HUMAN	EGFR_HUMAN	E2AK2_HUMAN
CSK22_HUMAN	GSK3A_HUMAN	EPHA2_HUMAN	E2AK4_HUMAN
E2AK2_HUMAN	GSK3B_HUMAN	ERN1_HUMAN	EF2K_HUMAN
E2AK4_HUMAN	ILK_HUMAN	FAK1_HUMAN	EGFR_HUMAN
EF2K_HUMAN	IRAK4_HUMAN	FER_HUMAN	FAK1_HUMAN
EGFR_HUMAN	KAPCA_HUMAN	GSK3A_HUMAN	FER_HUMAN
EPHA2_HUMAN	KC1A_HUMAN	GSK3B_HUMAN	FYN_HUMAN
ERN1_HUMAN	KC1E_HUMAN	GWL_HUMAN	GSK3A_HUMAN
FAK1_HUMAN	KC1G3_HUMAN	IKKE_HUMAN	GSK3B_HUMAN
FER_HUMAN	KCC1D_HUMAN	ILK_HUMAN	GWL_HUMAN
GSK3A_HUMAN	KCC2B_HUMAN	IRAK4_HUMAN	HCK_HUMAN
GSK3B_HUMAN	KCC2D_HUMAN	KC1A_HUMAN	ILK_HUMAN
GWL_HUMAN	KCC2G_HUMAN	KC1E_HUMAN	IRAK4_HUMAN
IKKA_HUMAN	KPCA_HUMAN	KCC1A_HUMAN	KAPCA_HUMAN
IKKB_HUMAN	KPCD1_HUMAN	KCC1D_HUMAN	KC1A_HUMAN
ILK_HUMAN	KS6A1_HUMAN	KCC2D_HUMAN	KC1E_HUMAN
IRAK4_HUMAN	KS6A3_HUMAN	KCC2G_HUMAN	KC1G1_HUMAN
KC1A_HUMAN	KS6B1_HUMAN	KCC4_HUMAN	KC1G3_HUMAN
KC1E_HUMAN	KS6C1_HUMAN	KPCD_HUMAN	KCC1D_HUMAN
KC1G3_HUMAN	LCK_HUMAN	KPCD2_HUMAN	KCC2D_HUMAN
KCC1D_HUMAN	LYN_HUMAN	KPCI_HUMAN	KCC2G_HUMAN
KCC2D_HUMAN	M3K11_HUMAN	KS6A1_HUMAN	KPCD_HUMAN
KCC2G_HUMAN	M3K3_HUMAN	KS6A3_HUMAN	KPCD1_HUMAN
KCC4_HUMAN	M4K4_HUMAN	KS6A5_HUMAN	KPCD2_HUMAN
KPCD1_HUMAN	M4K5_HUMAN	KS6B1_HUMAN	KPCD3_HUMAN
KPCD2_HUMAN	MARK2_HUMAN	KS6B2_HUMAN	KPCI_HUMAN
KS6A1_HUMAN	MARK3_HUMAN	KS6C1_HUMAN	KS6A1_HUMAN
KS6A2_HUMAN	MK01_HUMAN	LATS1_HUMAN	KS6A2_HUMAN
KS6A3_HUMAN	MK10_HUMAN	LYN_HUMAN	KS6A3_HUMAN
KS6A5_HUMAN	MLKL_HUMAN	M3K11_HUMAN	KS6A5_HUMAN
KS6B1_HUMAN	MP2K1_HUMAN	M3K2_HUMAN	KS6B1_HUMAN
KS6B2_HUMAN	MP2K4_HUMAN	M3K4_HUMAN	KS6C1_HUMAN
KS6C1_HUMAN	MP2K6_HUMAN	M3K5_HUMAN	M3K11_HUMAN
LATS1_HUMAN	MYLK_HUMAN	M4K2_HUMAN	M3K12_HUMAN
LATS2_HUMAN	NEK7_HUMAN	M4K3_HUMAN	M3K2_HUMAN
M3K11_HUMAN	NEK9_HUMAN	M4K4_HUMAN	M3K3_HUMAN
M3K15_HUMAN	NUAK1_HUMAN	M4K5_HUMAN	M3K4_HUMAN
M3K3_HUMAN	OBSCN_HUMAN	MARK1_HUMAN	M3K6_HUMAN
M3K4_HUMAN	PDPK1_HUMAN	MARK2_HUMAN	M4K2_HUMAN
M4K2_HUMAN	PHKG2_HUMAN	MARK3_HUMAN	M4K3_HUMAN
M4K3_HUMAN	PLK1_HUMAN	MARK4_HUMAN	M4K4_HUMAN
M4K5_HUMAN	PRKDC_HUMAN	MAST3_HUMAN	M4K5_HUMAN
MARK2_HUMAN	PRP4B_HUMAN	MERTK_HUMAN	MARK1_HUMAN
MARK3_HUMAN	PRPK_HUMAN	MK01_HUMAN	MARK2_HUMAN
MARK4_HUMAN	PTK7_HUMAN	MK10_HUMAN	MARK3_HUMAN
MAST3_HUMAN	ROCK1_HUMAN	MLKL_HUMAN	MARK4_HUMAN
MAST4_HUMAN	ROCK2_HUMAN	MP2K1_HUMAN	MAST3_HUMAN
MET_HUMAN	SLK_HUMAN	MP2K3_HUMAN	MK01_HUMAN
MK01_HUMAN	SMG1_HUMAN	MP2K4_HUMAN	MLKL_HUMAN
MK10_HUMAN	SRPK1_HUMAN	MP2K6_HUMAN	MLTK_HUMAN
MK14_HUMAN	SRPK2_HUMAN	MST4_HUMAN	MP2K1_HUMAN
MLKL_HUMAN	ST38L_HUMAN	NEK3_HUMAN	MP2K2_HUMAN
MP2K1_HUMAN	STK10_HUMAN	NEK4_HUMAN	MP2K3_HUMAN
MP2K3_HUMAN	STK11_HUMAN	NEK7_HUMAN	MP2K4_HUMAN
MP2K4_HUMAN	STK24_HUMAN	NUAK2_HUMAN	MP2K6_HUMAN
MP2K6_HUMAN	STK25_HUMAN	OXSR1_HUMAN	MST4_HUMAN
MP2K7_HUMAN	STK38_HUMAN	PAK2_HUMAN	NEK1_HUMAN
MST4_HUMAN	STK39_HUMAN	PAN3_HUMAN	NEK3_HUMAN
MYLK3_HUMAN	STK4_HUMAN	PDPK1_HUMAN	NEK4_HUMAN
NEK1_HUMAN	STRAA_HUMAN	PHKG2_HUMAN	NEK7_HUMAN
NEK3_HUMAN	TAOK2_HUMAN	PLK1_HUMAN	NEK9_HUMAN
NEK4_HUMAN	TAOK3_HUMAN	PRKDC_HUMAN	NUAK1_HUMAN
NEK7_HUMAN	TIE1_HUMAN	PRP4B_HUMAN	NUAK2_HUMAN
NEK8_HUMAN	TITIN_HUMAN	PRPK_HUMAN	OBSCN_HUMAN
NEK9_HUMAN	TLK1_HUMAN	PTK7_HUMAN	OXSR1_HUMAN
NUAK2_HUMAN	TLK2_HUMAN	PXK_HUMAN	PAK2_HUMAN
OBSCN_HUMAN	TRPM7_HUMAN	RIOK2_HUMAN	PAN3_HUMAN
OXSR1_HUMAN	ULK3_HUMAN	ROCK1_HUMAN	PDPK1_HUMAN
PAN3_HUMAN	WNK4_HUMAN	ROCK2_HUMAN	PHKG2_HUMAN
PDPK1_HUMAN		SLK_HUMAN	PLK1_HUMAN
PHKG2_HUMAN		SRPK1_HUMAN	PRKDC_HUMAN
PLK1_HUMAN		SRPK2_HUMAN	PRP4B_HUMAN
PRKDC_HUMAN		ST38L_HUMAN	PRPK_HUMAN
PRP4B_HUMAN		STK10_HUMAN	PTK7_HUMAN
PRPK_HUMAN		STK11_HUMAN	RIOK2_HUMAN
PXK_HUMAN		STK24_HUMAN	ROCK1_HUMAN
ROCK1_HUMAN		STK3_HUMAN	ROCK2_HUMAN
ROCK2_HUMAN		STK38_HUMAN	SLK_HUMAN
SLK_HUMAN		STK4_HUMAN	SMG1_HUMAN
SMG1_HUMAN		STRAA_HUMAN	SRPK1_HUMAN
SRC_HUMAN		TAOK1_HUMAN	SRPK2_HUMAN
SRPK2_HUMAN		TAOK2_HUMAN	ST38L_HUMAN
ST38L_HUMAN		TAOK3_HUMAN	STK10_HUMAN
STK10_HUMAN		TITIN_HUMAN	STK11_HUMAN
STK11_HUMAN		TLK1_HUMAN	STK24_HUMAN
STK24_HUMAN		TLK2_HUMAN	STK3_HUMAN
STK3_HUMAN		ULK3_HUMAN	STK38_HUMAN
STK38_HUMAN		WNK1_HUMAN	STK39_HUMAN
STK4_HUMAN			STK4_HUMAN
STRAA_HUMAN			STRAA_HUMAN
TAOK1_HUMAN			TAOK1_HUMAN
TAOK2_HUMAN			TAOK2_HUMAN
TAOK3_HUMAN			TAOK3_HUMAN
TBK1_HUMAN			TBK1_HUMAN
TLK2_HUMAN			TIE1_HUMAN
TNIK_HUMAN			TLK1_HUMAN
UFO_HUMAN			TLK2_HUMAN
ULK3_HUMAN			TNIK_HUMAN
VRK1_HUMAN			TOPK_HUMAN
WNK1_HUMAN			ULK3_HUMAN
			WNK1_HUMAN
			WNK4_HUMAN

## Sheet: Supp. Table 1C
Supplementary Table 1c. List of proteins that are significantly different (p-value < 0.05) in the isogenic naive and resistant cell lines (only leading protein shown) from database search of individual cell line models with ABPP (Figure 1A)
A375	WM164	1205Lu	WM793
1433B_HUMAN	1433B_HUMAN	1B51_HUMAN	1433B_HUMAN
1A02_HUMAN	1433E_HUMAN	2A5D_HUMAN	1433G_HUMAN
2AAA_HUMAN	1433F_HUMAN	3HIDH_HUMAN	1433T_HUMAN
2ABA_HUMAN	1433G_HUMAN	4F2_HUMAN	1433Z_HUMAN
4F2_HUMAN	1433S_HUMAN	5NTD_HUMAN	1A03_HUMAN
ABCF2_HUMAN	1433Z_HUMAN	AAKG1_HUMAN	2A5D_HUMAN
ABL2_HUMAN	1A24_HUMAN	ABCE1_HUMAN	2AAA_HUMAN
ACBD7_HUMAN	1B07_HUMAN	ACBP_HUMAN	3HIDH_HUMAN
ACOC_HUMAN	4F2_HUMAN	ACINU_HUMAN	4F2_HUMAN
ACSL3_HUMAN	6PGD_HUMAN	ACON_HUMAN	5NTD_HUMAN
ACTN1_HUMAN	A16A1_HUMAN	ACSL3_HUMAN	6PGD_HUMAN
ACTN4_HUMAN	AAAT_HUMAN	ACSL4_HUMAN	6PGL_HUMAN
ACYP1_HUMAN	AAKG1_HUMAN	ACTN1_HUMAN	8ODP_HUMAN
ADHX_HUMAN	AAPK1_HUMAN	ACTZ_HUMAN	AAKG2_HUMAN
ADT1_HUMAN	AASS_HUMAN	ADHX_HUMAN	AAPK1_HUMAN
ADT2_HUMAN	AATC_HUMAN	ADT1_HUMAN	ABCF2_HUMAN
AFG32_HUMAN	AATM_HUMAN	ADT2_HUMAN	ABCF3_HUMAN
AHNK_HUMAN	ABC3C_HUMAN	AHNK_HUMAN	ACADV_HUMAN
AIPL1_HUMAN	ABCB5_HUMAN	AHSA1_HUMAN	ACLY_HUMAN
AL1A3_HUMAN	ABCB7_HUMAN	AL1A3_HUMAN	ACON_HUMAN
AL9A1_HUMAN	ABCE1_HUMAN	AL3B1_HUMAN	ACSL3_HUMAN
ALDOA_HUMAN	ABCF1_HUMAN	ALDR_HUMAN	ACSL4_HUMAN
ALDR_HUMAN	ABI2_HUMAN	AMPN_HUMAN	ACTH_HUMAN
ALG5_HUMAN	ACADM_HUMAN	ANM1_HUMAN	ACTN1_HUMAN
AMPB_HUMAN	ACADS_HUMAN	ANXA1_HUMAN	ACTN4_HUMAN
AMPN_HUMAN	ACADV_HUMAN	ANXA2_HUMAN	ADT2_HUMAN
AN32A_HUMAN	ACBD7_HUMAN	ANXA6_HUMAN	ADT3_HUMAN
AN32E_HUMAN	ACBP_HUMAN	AP2M1_HUMAN	AGM1_HUMAN
ANR19_HUMAN	ACLY_HUMAN	APOD_HUMAN	AHNK_HUMAN
ANXA1_HUMAN	ACO13_HUMAN	ARC1B_HUMAN	AHSA1_HUMAN
ANXA2_HUMAN	ACON_HUMAN	ARHG2_HUMAN	AIMP1_HUMAN
ANXA5_HUMAN	ACSL3_HUMAN	ARP2_HUMAN	AKA12_HUMAN
ANXA6_HUMAN	ACTBL_HUMAN	ARP3_HUMAN	AKT3_HUMAN
AP2B1_HUMAN	ACTC_HUMAN	ARP5L_HUMAN	AL1A3_HUMAN
ARC1B_HUMAN	ACTG_HUMAN	ASNS_HUMAN	AL1L2_HUMAN
ARP2_HUMAN	ACTN1_HUMAN	ASPH_HUMAN	AL3B1_HUMAN
ASNS_HUMAN	ACTN4_HUMAN	AT1A1_HUMAN	AL7A1_HUMAN
ASPH_HUMAN	ACTZ_HUMAN	AT2A2_HUMAN	ALDOA_HUMAN
AT131_HUMAN	ACVR1_HUMAN	ATG7_HUMAN	AN32E_HUMAN
ATD3A_HUMAN	ADAS_HUMAN	ATLA2_HUMAN	ANLN_HUMAN
ATD3B_HUMAN	ADDA_HUMAN	ATLA3_HUMAN	ANXA1_HUMAN
ATP8_HUMAN	ADDG_HUMAN	ATOX1_HUMAN	ANXA2_HUMAN
ATPB_HUMAN	ADHX_HUMAN	ATP5H_HUMAN	ANXA4_HUMAN
ATPG_HUMAN	ADPGK_HUMAN	ATP8_HUMAN	ANXA5_HUMAN
ATX2L_HUMAN	ADRO_HUMAN	ATPA_HUMAN	ANXA6_HUMAN
BACH_HUMAN	ADT1_HUMAN	ATPG_HUMAN	AP1M1_HUMAN
BCLF1_HUMAN	ADT2_HUMAN	B2MG_HUMAN	AP2M1_HUMAN
BMS1_HUMAN	ADT3_HUMAN	BACH_HUMAN	API5_HUMAN
BRX1_HUMAN	AFG32_HUMAN	BAP31_HUMAN	APMAP_HUMAN
C1QBP_HUMAN	AGK_HUMAN	BASI_HUMAN	AR6P1_HUMAN
C1TC_HUMAN	AGO2_HUMAN	BIEA_HUMAN	ARC1B_HUMAN
CAB45_HUMAN	AHNK_HUMAN	BRAF_HUMAN	ARF3_HUMAN
CAD13_HUMAN	AIF1L_HUMAN	BUB1_HUMAN	ARFG1_HUMAN
CALM_HUMAN	AIFM1_HUMAN	C8AP2_HUMAN	ARL8A_HUMAN
CALX_HUMAN	AK1A1_HUMAN	CACP_HUMAN	ARP2_HUMAN
CAN2_HUMAN	AKA12_HUMAN	CALM_HUMAN	ARP3_HUMAN
CAP1_HUMAN	AKIP_HUMAN	CAPR1_HUMAN	ARPC2_HUMAN
CATB_HUMAN	AL1B1_HUMAN	CAV1_HUMAN	ARPC3_HUMAN
CBX3_HUMAN	AL4A1_HUMAN	CBR1_HUMAN	ARPC4_HUMAN
CC124_HUMAN	ALDOA_HUMAN	CCAR2_HUMAN	ARPC5_HUMAN
CC148_HUMAN	ALDR_HUMAN	CCD47_HUMAN	ARRB1_HUMAN
CCAR1_HUMAN	AMPD2_HUMAN	CCD58_HUMAN	ASAH1_HUMAN
CCDC6_HUMAN	AMPL_HUMAN	CD109_HUMAN	ASPH_HUMAN
CDC37_HUMAN	AMRP_HUMAN	CD44_HUMAN	AT1A1_HUMAN
CDC42_HUMAN	AN32A_HUMAN	CD9_HUMAN	AT1B3_HUMAN
CDK1_HUMAN	ANM1_HUMAN	CDC37_HUMAN	AT2A2_HUMAN
CELF1_HUMAN	ANXA1_HUMAN	CDK1_HUMAN	ATOX1_HUMAN
CH10_HUMAN	ANXA2_HUMAN	CDK14_HUMAN	ATP8_HUMAN
CH60_HUMAN	ANXA5_HUMAN	CDK19_HUMAN	ATPB_HUMAN
CHM1B_HUMAN	ANXA6_HUMAN	CDK2_HUMAN	ATPD_HUMAN
CHM2B_HUMAN	AOFA_HUMAN	CDK5_HUMAN	ATPK_HUMAN
CHMP5_HUMAN	AP2M1_HUMAN	CELF1_HUMAN	AURKA_HUMAN
CIRBP_HUMAN	APEX1_HUMAN	CH10_HUMAN	BAP31_HUMAN
CKAP4_HUMAN	APOE_HUMAN	CHCH2_HUMAN	BASI_HUMAN
CLH1_HUMAN	APOH_HUMAN	CHMP5_HUMAN	BAZ1B_HUMAN
CLIC1_HUMAN	APT_HUMAN	CHSP1_HUMAN	BGAL_HUMAN
CMS1_HUMAN	AR6P1_HUMAN	CKAP4_HUMAN	BIEA_HUMAN
CNBP_HUMAN	ARF6_HUMAN	CLH1_HUMAN	BOLA2_HUMAN
COF1_HUMAN	ARHG2_HUMAN	CMC1_HUMAN	BRX1_HUMAN
COPA_HUMAN	ARK72_HUMAN	CN37_HUMAN	BYST_HUMAN
COPB2_HUMAN	ARL1_HUMAN	CNN2_HUMAN	BZW1_HUMAN
COX5B_HUMAN	ARP19_HUMAN	CNRP1_HUMAN	CA198_HUMAN
CP21A_HUMAN	ARP2_HUMAN	COPA_HUMAN	CACP_HUMAN
CPSF6_HUMAN	ARP3_HUMAN	COPB_HUMAN	CALD1_HUMAN
CRIP2_HUMAN	ARPC2_HUMAN	COPD_HUMAN	CALM_HUMAN
CSK_HUMAN	ARPC3_HUMAN	COR1C_HUMAN	CALR_HUMAN
CSK2B_HUMAN	ARPC4_HUMAN	COTL1_HUMAN	CALU_HUMAN
CSN2_HUMAN	ARPC5_HUMAN	COX6C_HUMAN	CALX_HUMAN
CSPG4_HUMAN	ARRB1_HUMAN	CPNE3_HUMAN	CAN1_HUMAN
CTBP2_HUMAN	ASAH1_HUMAN	CSPG4_HUMAN	CAND1_HUMAN
CYC_HUMAN	ASML_HUMAN	CSRP1_HUMAN	CAP1_HUMAN
CYLC2_HUMAN	ASPC1_HUMAN	CSRP2_HUMAN	CAP2_HUMAN
DAF_HUMAN	ASPH_HUMAN	CYBP_HUMAN	CAPR1_HUMAN
DDX17_HUMAN	AT1A1_HUMAN	DAB2_HUMAN	CAPZB_HUMAN
DDX18_HUMAN	AT2A2_HUMAN	DBNL_HUMAN	CASP3_HUMAN
DDX47_HUMAN	AT2B4_HUMAN	DDX21_HUMAN	CATB_HUMAN
DDX5_HUMAN	ATAD2_HUMAN	DEK_HUMAN	CATD_HUMAN
DEK_HUMAN	ATD3A_HUMAN	DEST_HUMAN	CATZ_HUMAN
DHB12_HUMAN	ATD3B_HUMAN	DIAC_HUMAN	CAV1_HUMAN
DHB4_HUMAN	ATF1_HUMAN	DNM1L_HUMAN	CAZA1_HUMAN
DHE3_HUMAN	ATG7_HUMAN	DPYL2_HUMAN	CBR1_HUMAN
DHX9_HUMAN	ATLA3_HUMAN	DSRAD_HUMAN	CBX3_HUMAN
DIP2B_HUMAN	ATP5E_HUMAN	DUS3L_HUMAN	CD151_HUMAN
DLDH_HUMAN	ATP5H_HUMAN	DX39B_HUMAN	CD158_HUMAN
DNJA1_HUMAN	ATP6_HUMAN	DYHC1_HUMAN	CD166_HUMAN
DNJB1_HUMAN	ATP8_HUMAN	E2AK2_HUMAN	CD44_HUMAN
DNJC8_HUMAN	ATPA_HUMAN	E2AK4_HUMAN	CD59_HUMAN
DNLI1_HUMAN	ATPB_HUMAN	E41L2_HUMAN	CDK1_HUMAN
DSRAD_HUMAN	ATPD_HUMAN	ECHB_HUMAN	CDK14_HUMAN
DX39B_HUMAN	ATPG_HUMAN	EF1A1_HUMAN	CE170_HUMAN
EBP2_HUMAN	ATPO_HUMAN	EF1A2_HUMAN	CELF1_HUMAN
ECHA_HUMAN	ATX10_HUMAN	EF1B_HUMAN	CH10_HUMAN
ECI2_HUMAN	AUHM_HUMAN	EF2_HUMAN	CH60_HUMAN
EEA1_HUMAN	AURKA_HUMAN	EGFR_HUMAN	CHD4_HUMAN
EF1A1_HUMAN	B2MG_HUMAN	EHD2_HUMAN	CHM1A_HUMAN
EF1A2_HUMAN	BACH_HUMAN	EIF2A_HUMAN	CHM2A_HUMAN
EF1D_HUMAN	BAG2_HUMAN	EIF3A_HUMAN	CHM4B_HUMAN
EF1G_HUMAN	BAP29_HUMAN	EIF3G_HUMAN	CHRD1_HUMAN
EF2_HUMAN	BAP31_HUMAN	EIFCL_HUMAN	CHSP1_HUMAN
EFTU_HUMAN	BASI_HUMAN	ENAH_HUMAN	CIRBP_HUMAN
EGFR_HUMAN	BASP1_HUMAN	ENOG_HUMAN	CISD2_HUMAN
EHD2_HUMAN	BAZ1A_HUMAN	ENPL_HUMAN	CISY_HUMAN
EI2BE_HUMAN	BAZ1B_HUMAN	ENSA_HUMAN	CKAP4_HUMAN
EIF1B_HUMAN	BCLF1_HUMAN	ERF3A_HUMAN	CLH1_HUMAN
EIF2A_HUMAN	BD1L1_HUMAN	ERP29_HUMAN	CLIC4_HUMAN
EIF2D_HUMAN	BRD4_HUMAN	ERP44_HUMAN	CMC2_HUMAN
EIF3B_HUMAN	BRX1_HUMAN	EZRI_HUMAN	CN166_HUMAN
EIF3E_HUMAN	C1QBP_HUMAN	F111A_HUMAN	CN37_HUMAN
EIF3G_HUMAN	C1TC_HUMAN	FABP5_HUMAN	CND1_HUMAN
EIF3H_HUMAN	CALD1_HUMAN	FAK1_HUMAN	CND3_HUMAN
ELAV1_HUMAN	CALR_HUMAN	FAM3C_HUMAN	CNDP2_HUMAN
ENOA_HUMAN	CALU_HUMAN	FBRL_HUMAN	CNN2_HUMAN
ENPL_HUMAN	CALX_HUMAN	FCRLA_HUMAN	CNN3_HUMAN
EPHA2_HUMAN	CAND1_HUMAN	FEN1_HUMAN	CNPY2_HUMAN
ERF3A_HUMAN	CAP1_HUMAN	FGF2_HUMAN	CO5A3_HUMAN
ERH_HUMAN	CAPG_HUMAN	FKB10_HUMAN	COPA_HUMAN
ERLEC_HUMAN	CAPR1_HUMAN	FKBP4_HUMAN	COPB_HUMAN
ERLN2_HUMAN	CAPZB_HUMAN	FLNA_HUMAN	COPD_HUMAN
ERN1_HUMAN	CATA_HUMAN	FLNB_HUMAN	COPG1_HUMAN
ERO1B_HUMAN	CATB_HUMAN	FOSB_HUMAN	COTL1_HUMAN
ES1_HUMAN	CATD_HUMAN	FSCN1_HUMAN	COX6C_HUMAN
ETFA_HUMAN	CAZA1_HUMAN	FUMH_HUMAN	CPNE1_HUMAN
ETFB_HUMAN	CB080_HUMAN	GAS7_HUMAN	CPNS1_HUMAN
F10A1_HUMAN	CBPD_HUMAN	GBB2_HUMAN	CPSF7_HUMAN
F136A_HUMAN	CBX1_HUMAN	GDIA_HUMAN	CRIP2_HUMAN
F162A_HUMAN	CBX3_HUMAN	GDIR1_HUMAN	CROCC_HUMAN
FABP5_HUMAN	CCAR1_HUMAN	GFPT1_HUMAN	CRYAB_HUMAN
FAK1_HUMAN	CCAR2_HUMAN	GLTL5_HUMAN	CS010_HUMAN
FAM3C_HUMAN	CCD58_HUMAN	GLU2B_HUMAN	CSN2_HUMAN
FAS_HUMAN	CD109_HUMAN	GRP75_HUMAN	CSPG4_HUMAN
FEN1_HUMAN	CD11B_HUMAN	GRP78_HUMAN	CT027_HUMAN
FKB11_HUMAN	CD44_HUMAN	GSH0_HUMAN	CTGF_HUMAN
FKB1A_HUMAN	CD59_HUMAN	GSHR_HUMAN	CUX1_HUMAN
FKBP3_HUMAN	CD63_HUMAN	GSK3B_HUMAN	CYB5B_HUMAN
FKBP8_HUMAN	CD99_HUMAN	GT251_HUMAN	CYBP_HUMAN
FLNA_HUMAN	CDC42_HUMAN	GTR1_HUMAN	CYC_HUMAN
FLNB_HUMAN	CDK14_HUMAN	H12_HUMAN	CYFP1_HUMAN
FND3A_HUMAN	CDK2_HUMAN	H14_HUMAN	DAZP1_HUMAN
FUBP3_HUMAN	CDK5_HUMAN	H1X_HUMAN	DCTD_HUMAN
G3BP1_HUMAN	CECR5_HUMAN	H2B1B_HUMAN	DCTN3_HUMAN
G3P_HUMAN	CELF2_HUMAN	H2B1K_HUMAN	DCXR_HUMAN
GALT2_HUMAN	CEMIP_HUMAN	H2B1O_HUMAN	DDX1_HUMAN
GDIA_HUMAN	CGBP1_HUMAN	H31_HUMAN	DDX17_HUMAN
GELS_HUMAN	CH10_HUMAN	H90B4_HUMAN	DDX18_HUMAN
GLRX3_HUMAN	CH60_HUMAN	HDGF_HUMAN	DDX21_HUMAN
GLU2B_HUMAN	CHAP1_HUMAN	HDGR2_HUMAN	DDX24_HUMAN
GNAI2_HUMAN	CHCH2_HUMAN	HINT1_HUMAN	DDX3X_HUMAN
GNAS2_HUMAN	CHCH3_HUMAN	HM13_HUMAN	DDX46_HUMAN
GRP75_HUMAN	CHID1_HUMAN	HMGB1_HUMAN	DDX5_HUMAN
GRP78_HUMAN	CHM1B_HUMAN	HMGN2_HUMAN	DDX50_HUMAN
GTF2I_HUMAN	CHM4B_HUMAN	HNRH1_HUMAN	DECR_HUMAN
GTR1_HUMAN	CHTOP_HUMAN	HNRH2_HUMAN	DEK_HUMAN
GUAA_HUMAN	CISD1_HUMAN	HNRPC_HUMAN	DEST_HUMAN
H12_HUMAN	CISY_HUMAN	HNRPD_HUMAN	DHB12_HUMAN
H2AX_HUMAN	CJ011_HUMAN	HNRPF_HUMAN	DHE3_HUMAN
H2AY_HUMAN	CKAP4_HUMAN	HNRPM_HUMAN	DHX15_HUMAN
H2B1J_HUMAN	CKAP5_HUMAN	HNRPQ_HUMAN	DHX37_HUMAN
H2B1K_HUMAN	CLCN3_HUMAN	HNRPU_HUMAN	DHX8_HUMAN
H4_HUMAN	CLCN7_HUMAN	HP1B3_HUMAN	DHX9_HUMAN
HDGR2_HUMAN	CLH1_HUMAN	HPRT_HUMAN	DLDH_HUMAN
HEXB_HUMAN	CLIP2_HUMAN	HS105_HUMAN	DLGP4_HUMAN
HMGA1_HUMAN	CLPB_HUMAN	HS90A_HUMAN	DNLI1_HUMAN
HMGB2_HUMAN	CLPP_HUMAN	HS90B_HUMAN	DPYL1_HUMAN
HMGB3_HUMAN	CMC2_HUMAN	HSP74_HUMAN	DPYL2_HUMAN
HNRDL_HUMAN	CN37_HUMAN	HSP7C_HUMAN	DRA_HUMAN
HNRL2_HUMAN	CNDD3_HUMAN	HSPB1_HUMAN	DRP2_HUMAN
HNRPC_HUMAN	CNN2_HUMAN	HUWE1_HUMAN	DUT_HUMAN
HNRPD_HUMAN	CNN3_HUMAN	HXK1_HUMAN	DYHC1_HUMAN
HNRPK_HUMAN	CNPY3_HUMAN	HYOU1_HUMAN	DYN2_HUMAN
HNRPL_HUMAN	CO1A1_HUMAN	IDHP_HUMAN	E41L2_HUMAN
HNRPU_HUMAN	CO3A1_HUMAN	IF2B2_HUMAN	E41L3_HUMAN
HOOK3_HUMAN	CO6A2_HUMAN	IF2B3_HUMAN	ECH1_HUMAN
HP1B3_HUMAN	CO6A3_HUMAN	IF2G_HUMAN	ECHA_HUMAN
HPCL1_HUMAN	COF1_HUMAN	IF4A1_HUMAN	ECI2_HUMAN
HS90A_HUMAN	COF2_HUMAN	IF4A3_HUMAN	EEA1_HUMAN
HSP71_HUMAN	COMT_HUMAN	IF4B_HUMAN	EF1A1_HUMAN
HSP7C_HUMAN	COPA_HUMAN	IF4G1_HUMAN	EF1B_HUMAN
HSP7E_HUMAN	COPD_HUMAN	IF4G3_HUMAN	EF1G_HUMAN
HUWE1_HUMAN	COR1C_HUMAN	IKKE_HUMAN	EF2_HUMAN
HXK1_HUMAN	CORO6_HUMAN	IL1B_HUMAN	EFTU_HUMAN
HYOU1_HUMAN	COTL1_HUMAN	IL8_HUMAN	EHD2_HUMAN
IDHC_HUMAN	COX41_HUMAN	ILF2_HUMAN	EHD4_HUMAN
IF16_HUMAN	COX5B_HUMAN	ILF3_HUMAN	EIF1A_HUMAN
IF1AX_HUMAN	COX6C_HUMAN	IMMT_HUMAN	EIF2A_HUMAN
IF2B_HUMAN	COXM1_HUMAN	IQGA1_HUMAN	EIF3B_HUMAN
IF2B1_HUMAN	CP131_HUMAN	ITA3_HUMAN	EIF3E_HUMAN
IF2B3_HUMAN	CP27A_HUMAN	ITAV_HUMAN	EIF3G_HUMAN
IF4E_HUMAN	CP51A_HUMAN	ITB3_HUMAN	EIF3H_HUMAN
ILK_HUMAN	CPNE3_HUMAN	ITIH5_HUMAN	EIF3I_HUMAN
IMB1_HUMAN	CPT2_HUMAN	KAD2_HUMAN	ELAV4_HUMAN
IMDH2_HUMAN	CRTAP_HUMAN	KAD3_HUMAN	ELOB_HUMAN
IMMT_HUMAN	CS010_HUMAN	KC1A_HUMAN	ENOA_HUMAN
IPO5_HUMAN	CS068_HUMAN	KCY_HUMAN	ENPL_HUMAN
IQGA1_HUMAN	CSK21_HUMAN	KGUA_HUMAN	ENY2_HUMAN
ISOC2_HUMAN	CSK22_HUMAN	KI67_HUMAN	ERF1_HUMAN
K1C18_HUMAN	CSKP_HUMAN	KLHL1_HUMAN	ERGI1_HUMAN
K6PF_HUMAN	CSPG4_HUMAN	KPCD_HUMAN	ERH_HUMAN
K6PP_HUMAN	CSRP1_HUMAN	KPCI_HUMAN	ERI3_HUMAN
KAD4_HUMAN	CSRP2_HUMAN	KPYM_HUMAN	ERLN1_HUMAN
KC1G3_HUMAN	CUL4B_HUMAN	KS6A1_HUMAN	ERP29_HUMAN
KCC2G_HUMAN	CX6B1_HUMAN	KS6A3_HUMAN	ESYT2_HUMAN
KCNKA_HUMAN	CX7A2_HUMAN	KS6A5_HUMAN	ETFA_HUMAN
KHDR1_HUMAN	CYBP_HUMAN	KS6B2_HUMAN	EXOS8_HUMAN
KINH_HUMAN	CYC_HUMAN	KTN1_HUMAN	EZRI_HUMAN
KPCD1_HUMAN	CYGB_HUMAN	LAP2A_HUMAN	F10A1_HUMAN
KPYM_HUMAN	CYTB_HUMAN	LDHA_HUMAN	FA20A_HUMAN
KS6B2_HUMAN	DAZP1_HUMAN	LDHB_HUMAN	FABP5_HUMAN
KTN1_HUMAN	DBNL_HUMAN	LEG1_HUMAN	FABP7_HUMAN
KYNU_HUMAN	DCK_HUMAN	LEG3_HUMAN	FAS_HUMAN
L10K_HUMAN	DCTN1_HUMAN	LIPB1_HUMAN	FBRL_HUMAN
LA_HUMAN	DDTL_HUMAN	LMAN1_HUMAN	FEN1_HUMAN
LAP2B_HUMAN	DDX1_HUMAN	LMAN2_HUMAN	FERM2_HUMAN
LAR1B_HUMAN	DDX17_HUMAN	LMNA_HUMAN	FKB11_HUMAN
LARP1_HUMAN	DDX18_HUMAN	LMNB1_HUMAN	FKBP2_HUMAN
LASP1_HUMAN	DDX24_HUMAN	LONM_HUMAN	FKBP3_HUMAN
LATS2_HUMAN	DDX42_HUMAN	LYAR_HUMAN	FKBP7_HUMAN
LC7L2_HUMAN	DDX46_HUMAN	M3K2_HUMAN	FKBP9_HUMAN
LDHA_HUMAN	DDX5_HUMAN	M4K5_HUMAN	FLNA_HUMAN
LDHB_HUMAN	DDX6_HUMAN	MAP11_HUMAN	FLNB_HUMAN
LIPB1_HUMAN	DEST_HUMAN	MAP1B_HUMAN	FLNC_HUMAN
LKHA4_HUMAN	DHB11_HUMAN	MAP4_HUMAN	FPPS_HUMAN
LMNA_HUMAN	DHB12_HUMAN	MBNL1_HUMAN	FSCN1_HUMAN
LMNB1_HUMAN	DHB4_HUMAN	MDHC_HUMAN	FUBP1_HUMAN
LONM_HUMAN	DHE3_HUMAN	MDHM_HUMAN	FUMH_HUMAN
LYAR_HUMAN	DHPR_HUMAN	MESH1_HUMAN	FYN_HUMAN
M4K3_HUMAN	DHRS4_HUMAN	MICA2_HUMAN	G3BP1_HUMAN
M4K5_HUMAN	DHSO_HUMAN	MK10_HUMAN	G6PD_HUMAN
MAGA4_HUMAN	DHX15_HUMAN	ML12A_HUMAN	G6PI_HUMAN
MARCS_HUMAN	DHX36_HUMAN	MMP2_HUMAN	GALK2_HUMAN
MARK3_HUMAN	DHX9_HUMAN	MOES_HUMAN	GANAB_HUMAN
MAST4_HUMAN	DIP2B_HUMAN	MP2K3_HUMAN	GAS7_HUMAN
MAT2B_HUMAN	DJB11_HUMAN	MPCP_HUMAN	GBG2_HUMAN
MATR3_HUMAN	DKC1_HUMAN	MT2_HUMAN	GDIB_HUMAN
MBB1A_HUMAN	DLDH_HUMAN	MTAP_HUMAN	GELS_HUMAN
MBOA7_HUMAN	DNJA1_HUMAN	MTPN_HUMAN	GIPC1_HUMAN
MCM5_HUMAN	DNJA2_HUMAN	MYH10_HUMAN	GLU2B_HUMAN
MCM7_HUMAN	DNJA3_HUMAN	MYH9_HUMAN	GLYM_HUMAN
MDHC_HUMAN	DNM1L_HUMAN	MYO1B_HUMAN	GMFB_HUMAN
MDHM_HUMAN	DPM1_HUMAN	MYOF_HUMAN	GNAI2_HUMAN
MESH1_HUMAN	DPOG1_HUMAN	NAA10_HUMAN	GOLM1_HUMAN
MFAP1_HUMAN	DPOLZ_HUMAN	NAA15_HUMAN	GRP78_HUMAN
MGN2_HUMAN	DPYL2_HUMAN	NACAM_HUMAN	GRSF1_HUMAN
MIF_HUMAN	DUT_HUMAN	NAMPT_HUMAN	GSLG1_HUMAN
MINP1_HUMAN	DX39A_HUMAN	NB5R3_HUMAN	GST2_HUMAN
MLKL_HUMAN	DX39B_HUMAN	NEK4_HUMAN	GSTK1_HUMAN
MMAB_HUMAN	DYHC1_HUMAN	NENF_HUMAN	GSTO1_HUMAN
MOES_HUMAN	DYL1_HUMAN	NEST_HUMAN	GTF2I_HUMAN
MOT1_HUMAN	E2AK2_HUMAN	NFKB2_HUMAN	GTPB1_HUMAN
MP2K3_HUMAN	E41L2_HUMAN	NGAL_HUMAN	GTR1_HUMAN
MP2K7_HUMAN	E41L3_HUMAN	NONO_HUMAN	GUAA_HUMAN
MP3B2_HUMAN	EBP2_HUMAN	NOP2_HUMAN	GWL_HUMAN
MPCP_HUMAN	ECHA_HUMAN	NP1L1_HUMAN	H10_HUMAN
MPP8_HUMAN	ECHD1_HUMAN	NPC2_HUMAN	H11_HUMAN
MPRD_HUMAN	ECHM_HUMAN	NQO1_HUMAN	H2A1B_HUMAN
MT2_HUMAN	ECI2_HUMAN	NRK1_HUMAN	H2A2C_HUMAN
MVP_HUMAN	EDF1_HUMAN	NUAK2_HUMAN	H2AZ_HUMAN
MYH10_HUMAN	EDIL3_HUMAN	NUBPL_HUMAN	H2B1D_HUMAN
MYH9_HUMAN	EF1A1_HUMAN	NUCB1_HUMAN	H2B1K_HUMAN
MYLK3_HUMAN	EF1B_HUMAN	NUCB2_HUMAN	H2B1L_HUMAN
MYO9A_HUMAN	EF1D_HUMAN	NUCL_HUMAN	H2B2F_HUMAN
MYOF_HUMAN	EF1G_HUMAN	OCC1_HUMAN	H31_HUMAN
NAA30_HUMAN	EF2_HUMAN	ODO2_HUMAN	H33_HUMAN
NAKD2_HUMAN	EFTU_HUMAN	OFUT1_HUMAN	H90B2_HUMAN
NAMPT_HUMAN	EGFR_HUMAN	P5I11_HUMAN	HBB_HUMAN
NASP_HUMAN	EHD2_HUMAN	PA1B2_HUMAN	HCD2_HUMAN
NB5R3_HUMAN	EIF1B_HUMAN	PABP1_HUMAN	HCK_HUMAN
NCBP2_HUMAN	EIF3D_HUMAN	PAIRB_HUMAN	HDGF_HUMAN
NDKA_HUMAN	EIF3E_HUMAN	PAK2_HUMAN	HDGR3_HUMAN
NDUS3_HUMAN	EIF3G_HUMAN	PARK7_HUMAN	HDHD2_HUMAN
NDUS5_HUMAN	EIF3H_HUMAN	PARP1_HUMAN	HGS_HUMAN
NEDD8_HUMAN	EIF3I_HUMAN	PARVA_HUMAN	HMGA1_HUMAN
NELFE_HUMAN	EIF3J_HUMAN	PCBP1_HUMAN	HMGB1_HUMAN
NEP1_HUMAN	EIF3M_HUMAN	PCNA_HUMAN	HMGB2_HUMAN
NGAL_HUMAN	EIFCL_HUMAN	PDIA1_HUMAN	HMGN1_HUMAN
NIBL1_HUMAN	ELAV1_HUMAN	PDIA4_HUMAN	HMGN3_HUMAN
NIP7_HUMAN	ELOC_HUMAN	PDIA5_HUMAN	HNRDL_HUMAN
NLE1_HUMAN	EMSA1_HUMAN	PDIA6_HUMAN	HNRH1_HUMAN
NLTP_HUMAN	ENOA_HUMAN	PDLI1_HUMAN	HNRL2_HUMAN
NNMT_HUMAN	ENOG_HUMAN	PDLI5_HUMAN	HNRLL_HUMAN
NONO_HUMAN	ENPL_HUMAN	PGK1_HUMAN	HNRPC_HUMAN
NOP2_HUMAN	ENPP1_HUMAN	PGRC1_HUMAN	HNRPD_HUMAN
NOP56_HUMAN	ENSA_HUMAN	PHB_HUMAN	HNRPF_HUMAN
NPL4_HUMAN	ENTP5_HUMAN	PI42C_HUMAN	HNRPK_HUMAN
NPM_HUMAN	EPHA2_HUMAN	PIR_HUMAN	HNRPM_HUMAN
NUAK2_HUMAN	EPHA5_HUMAN	PLEC_HUMAN	HNRPQ_HUMAN
NUCKS_HUMAN	ERG1_HUMAN	PP1A_HUMAN	HNRPU_HUMAN
NUCL_HUMAN	ERGI1_HUMAN	PP2AA_HUMAN	HP1B3_HUMAN
NUMA1_HUMAN	ERLN1_HUMAN	PPAL_HUMAN	HPRT_HUMAN
ODB2_HUMAN	ERLN2_HUMAN	PPIF_HUMAN	HS90A_HUMAN
ODPB_HUMAN	ERO1A_HUMAN	PRKDC_HUMAN	HS90B_HUMAN
OFUT1_HUMAN	ERP29_HUMAN	PROF2_HUMAN	HSDL2_HUMAN
OSTC_HUMAN	ERP44_HUMAN	PRP6_HUMAN	HSP72_HUMAN
PA2G4_HUMAN	ESTD_HUMAN	PRS6B_HUMAN	HSP74_HUMAN
PABP4_HUMAN	ESYT2_HUMAN	PSB10_HUMAN	HSP7C_HUMAN
PACN2_HUMAN	ETFA_HUMAN	PSIP1_HUMAN	HSPB1_HUMAN
PAPS1_HUMAN	ETFB_HUMAN	PSMD2_HUMAN	HXK1_HUMAN
PAPS2_HUMAN	EZRI_HUMAN	PSMD3_HUMAN	HYOU1_HUMAN
PARN_HUMAN	F10A1_HUMAN	PSMD6_HUMAN	IDHC_HUMAN
PARP1_HUMAN	F136A_HUMAN	PSMD7_HUMAN	IF16_HUMAN
PCBP1_HUMAN	F210A_HUMAN	PTBP3_HUMAN	IF1AX_HUMAN
PCNA_HUMAN	FA98A_HUMAN	PTN1_HUMAN	IF2A_HUMAN
PDIA1_HUMAN	FABP7_HUMAN	PTRF_HUMAN	IF2B2_HUMAN
PDIA4_HUMAN	FACE1_HUMAN	PUR1_HUMAN	IF2B3_HUMAN
PDIA6_HUMAN	FAF2_HUMAN	PUR6_HUMAN	IF2G_HUMAN
PDLI1_HUMAN	FAH2B_HUMAN	PURB_HUMAN	IF4A1_HUMAN
PELP1_HUMAN	FAHD1_HUMAN	PYC_HUMAN	IF4G1_HUMAN
PFD3_HUMAN	FAK1_HUMAN	PYGB_HUMAN	IF4G2_HUMAN
PFD4_HUMAN	FAS_HUMAN	PYGL_HUMAN	IF4G3_HUMAN
PGK1_HUMAN	FBRL_HUMAN	PYR1_HUMAN	IF4H_HUMAN
PGM2_HUMAN	FERM2_HUMAN	QCR2_HUMAN	ILF2_HUMAN
PHB_HUMAN	FHIT_HUMAN	QCR9_HUMAN	ILF3_HUMAN
PHB2_HUMAN	FHL1_HUMAN	RAB10_HUMAN	ILK_HUMAN
PHF5A_HUMAN	FHL2_HUMAN	RAB14_HUMAN	ILVBL_HUMAN
PLCB4_HUMAN	FINC_HUMAN	RADI_HUMAN	IMB1_HUMAN
PLEC_HUMAN	FIS1_HUMAN	RANB3_HUMAN	IMDH2_HUMAN
PLIN2_HUMAN	FKBP2_HUMAN	RAP1B_HUMAN	IQGA1_HUMAN
PLOD2_HUMAN	FKBP3_HUMAN	RBMX_HUMAN	IQGA2_HUMAN
PLOD3_HUMAN	FKBP4_HUMAN	RECQ1_HUMAN	IQGA3_HUMAN
PP1G_HUMAN	FLNA_HUMAN	RFIP5_HUMAN	IST1_HUMAN
PPAL_HUMAN	FLNB_HUMAN	RHOC_HUMAN	ITA1_HUMAN
PPIA_HUMAN	FLNC_HUMAN	RIOK2_HUMAN	ITA2_HUMAN
PPIF_HUMAN	FLOT1_HUMAN	RL10_HUMAN	ITA3_HUMAN
PPR18_HUMAN	FPPS_HUMAN	RL13_HUMAN	ITPK1_HUMAN
PPR3C_HUMAN	FSCN1_HUMAN	RL14_HUMAN	ITPR3_HUMAN
PR40A_HUMAN	FUBP2_HUMAN	RL15_HUMAN	K6PF_HUMAN
PRDX1_HUMAN	FUMH_HUMAN	RL18_HUMAN	K6PL_HUMAN
PRKDC_HUMAN	FUND2_HUMAN	RL18A_HUMAN	KAP0_HUMAN
PRP6_HUMAN	FXR1_HUMAN	RL19_HUMAN	KCC1D_HUMAN
PRS10_HUMAN	FYN_HUMAN	RL22_HUMAN	KCC2D_HUMAN
PRS4_HUMAN	G3BP1_HUMAN	RL22L_HUMAN	KCC2G_HUMAN
PRS6A_HUMAN	G3BP2_HUMAN	RL23_HUMAN	KCY_HUMAN
PRS7_HUMAN	G3P_HUMAN	RL24_HUMAN	KDEL2_HUMAN
PRS8_HUMAN	G3PT_HUMAN	RL29_HUMAN	KDM1B_HUMAN
PSA6_HUMAN	G6PD_HUMAN	RL31_HUMAN	KHDR1_HUMAN
PSB10_HUMAN	G6PI_HUMAN	RL35_HUMAN	KHDR3_HUMAN
PSIP1_HUMAN	GALE_HUMAN	RL35A_HUMAN	KIF9_HUMAN
PSMD2_HUMAN	GALM_HUMAN	RL37_HUMAN	KINH_HUMAN
PSMD4_HUMAN	GALT2_HUMAN	RL38_HUMAN	KLC1_HUMAN
PSMD8_HUMAN	GANAB_HUMAN	RL4_HUMAN	KPCD1_HUMAN
PTRF_HUMAN	GBG12_HUMAN	RL8_HUMAN	KS6A5_HUMAN
PUF60_HUMAN	GBG5_HUMAN	RLA0_HUMAN	KTN1_HUMAN
PUR2_HUMAN	GBLP_HUMAN	ROA1_HUMAN	LA_HUMAN
PUR6_HUMAN	GBP1_HUMAN	ROA2_HUMAN	LAMB1_HUMAN
PUR9_HUMAN	GCDH_HUMAN	ROAA_HUMAN	LAMC1_HUMAN
PURA_HUMAN	GCN1L_HUMAN	RPC1_HUMAN	LAP2A_HUMAN
PYGB_HUMAN	GCP60_HUMAN	RRBP1_HUMAN	LAP2B_HUMAN
PYGL_HUMAN	GDIB_HUMAN	RS11_HUMAN	LASP1_HUMAN
QCR1_HUMAN	GDIR1_HUMAN	RS13_HUMAN	LAT1_HUMAN
QCR8_HUMAN	GDN_HUMAN	RS14_HUMAN	LBH_HUMAN
RALY_HUMAN	GELS_HUMAN	RS16_HUMAN	LC7L2_HUMAN
RAN_HUMAN	GEMI2_HUMAN	RS2_HUMAN	LDH6A_HUMAN
RAP1B_HUMAN	GLGB_HUMAN	RS27A_HUMAN	LDHA_HUMAN
RB11B_HUMAN	GLO2_HUMAN	RS3_HUMAN	LDHB_HUMAN
RBM25_HUMAN	GLU2B_HUMAN	RS5_HUMAN	LEG1_HUMAN
RBMX_HUMAN	GLYM_HUMAN	RS9_HUMAN	LEG3_HUMAN
RBSK_HUMAN	GMFB_HUMAN	S100B_HUMAN	LGUL_HUMAN
RCC2_HUMAN	GNA1_HUMAN	S10A1_HUMAN	LIMA1_HUMAN
RECQ1_HUMAN	GNAI2_HUMAN	S10AD_HUMAN	LIMS1_HUMAN
RED_HUMAN	GNAS1_HUMAN	S12A2_HUMAN	LIPB1_HUMAN
RER1_HUMAN	GNL3_HUMAN	SAHH_HUMAN	LMAN1_HUMAN
RHOG_HUMAN	GOPC_HUMAN	SAHH2_HUMAN	LMNB1_HUMAN
RIR1_HUMAN	GPC1_HUMAN	SAR1A_HUMAN	LRC15_HUMAN
RL13_HUMAN	GPDM_HUMAN	SCOT1_HUMAN	LRC59_HUMAN
RL13A_HUMAN	GRN_HUMAN	SDCB1_HUMAN	LYAR_HUMAN
RL19_HUMAN	GRP75_HUMAN	SDHA_HUMAN	LYRIC_HUMAN
RL22_HUMAN	GRP78_HUMAN	SEC13_HUMAN	M2OM_HUMAN
RL23_HUMAN	GRPE1_HUMAN	SEP10_HUMAN	M4K5_HUMAN
RL24_HUMAN	GSHB_HUMAN	SEP11_HUMAN	MA2B1_HUMAN
RL26_HUMAN	GSHR_HUMAN	SEPT2_HUMAN	MAGD2_HUMAN
RL27_HUMAN	GSLG1_HUMAN	SEPT9_HUMAN	MAGT1_HUMAN
RL29_HUMAN	GSTO1_HUMAN	SERA_HUMAN	MAP4_HUMAN
RL30_HUMAN	GSTP1_HUMAN	SERPH_HUMAN	MARCS_HUMAN
RL34_HUMAN	GTF2I_HUMAN	SET_HUMAN	MARE1_HUMAN
RL36A_HUMAN	GXLT2_HUMAN	SF3B1_HUMAN	MARK3_HUMAN
RL36L_HUMAN	H10_HUMAN	SF3B2_HUMAN	MAST3_HUMAN
RL38_HUMAN	H12_HUMAN	SFPQ_HUMAN	MATR3_HUMAN
RL4_HUMAN	H13_HUMAN	SFXN1_HUMAN	MBB1A_HUMAN
RL6_HUMAN	H14_HUMAN	SIL1_HUMAN	MBNL1_HUMAN
RL7_HUMAN	H15_HUMAN	SODC_HUMAN	MBOA7_HUMAN
RMD1_HUMAN	H1X_HUMAN	SOX10_HUMAN	MCA3_HUMAN
ROA1_HUMAN	H2A1C_HUMAN	SPTB2_HUMAN	MCM7_HUMAN
ROA2_HUMAN	H2AZ_HUMAN	SPTN1_HUMAN	MDHC_HUMAN
ROCK2_HUMAN	H2B1B_HUMAN	SQRD_HUMAN	MDHM_HUMAN
RPN2_HUMAN	H2B1K_HUMAN	SRP14_HUMAN	MESH1_HUMAN
RRBP1_HUMAN	H2B1L_HUMAN	SRPRB_HUMAN	MILK2_HUMAN
RS10_HUMAN	H2B1M_HUMAN	SRRT_HUMAN	MK01_HUMAN
RS11_HUMAN	H4_HUMAN	SRSF6_HUMAN	MK67I_HUMAN
RS23_HUMAN	HACD3_HUMAN	ST38L_HUMAN	ML12B_HUMAN
RS24_HUMAN	HCFC1_HUMAN	STIP1_HUMAN	MLKL_HUMAN
RS4X_HUMAN	HDAC1_HUMAN	STK10_HUMAN	MO4L1_HUMAN
RS9_HUMAN	HDDC2_HUMAN	STML2_HUMAN	MOES_HUMAN
RT07_HUMAN	HDGF_HUMAN	STXB6_HUMAN	MOGS_HUMAN
RT09_HUMAN	HEM6_HUMAN	SUMO1_HUMAN	MP2K2_HUMAN
RT23_HUMAN	HEXA_HUMAN	SUMO2_HUMAN	MP2K6_HUMAN
RTN4_HUMAN	HEXB_HUMAN	SYEP_HUMAN	MP3B2_HUMAN
RU1C_HUMAN	HGS_HUMAN	SYG_HUMAN	MPP8_HUMAN
RUVB1_HUMAN	HIBCH_HUMAN	SYHC_HUMAN	MTA2_HUMAN
RUVB2_HUMAN	HINT1_HUMAN	SYIC_HUMAN	MTPN_HUMAN
S10A6_HUMAN	HM13_HUMAN	SYNC_HUMAN	MUC18_HUMAN
S10AD_HUMAN	HMGA1_HUMAN	SYQ_HUMAN	MY18A_HUMAN
S12A4_HUMAN	HMGB1_HUMAN	SYT10_HUMAN	MYH10_HUMAN
S12A7_HUMAN	HMGB2_HUMAN	SYWC_HUMAN	MYH14_HUMAN
S26A2_HUMAN	HMGCL_HUMAN	SYYC_HUMAN	MYH9_HUMAN
SAHH_HUMAN	HMGN1_HUMAN	TALDO_HUMAN	MYL3_HUMAN
SDHA_HUMAN	HMOX2_HUMAN	TBB2B_HUMAN	MYO1C_HUMAN
SDHB_HUMAN	HNRH1_HUMAN	TBB5_HUMAN	MYOF_HUMAN
SEM3C_HUMAN	HNRH2_HUMAN	TCPA_HUMAN	NAA10_HUMAN
SERC_HUMAN	HNRL2_HUMAN	TCPB_HUMAN	NAA15_HUMAN
SERPH_HUMAN	HNRPC_HUMAN	TCPD_HUMAN	NAT10_HUMAN
SET_HUMAN	HNRPF_HUMAN	TCPE_HUMAN	NB5R3_HUMAN
SF3B1_HUMAN	HNRPL_HUMAN	TCPG_HUMAN	NDKB_HUMAN
SFPQ_HUMAN	HNRPM_HUMAN	TCPQ_HUMAN	NDUA4_HUMAN
SH3K1_HUMAN	HNRPQ_HUMAN	TCTP_HUMAN	NDUA5_HUMAN
SLIRP_HUMAN	HNRPR_HUMAN	TERA_HUMAN	NDUAC_HUMAN
SLK_HUMAN	HNRPU_HUMAN	TFR1_HUMAN	NDUS1_HUMAN
SLN11_HUMAN	HP1B3_HUMAN	THIO_HUMAN	NDUS2_HUMAN
SMC1A_HUMAN	HPCL1_HUMAN	TIF1B_HUMAN	NDUS4_HUMAN
SMU1_HUMAN	HPRT_HUMAN	TKT_HUMAN	NDUS5_HUMAN
SND1_HUMAN	HS105_HUMAN	TLK1_HUMAN	NDUV1_HUMAN
SODC_HUMAN	HS904_HUMAN	TLN1_HUMAN	NEDD8_HUMAN
SOX10_HUMAN	HS90A_HUMAN	TM9S2_HUMAN	NEK9_HUMAN
SPB1_HUMAN	HS90B_HUMAN	TMCO1_HUMAN	NEP1_HUMAN
SPCS3_HUMAN	HSP71_HUMAN	TOM34_HUMAN	NEST_HUMAN
SPTB2_HUMAN	HSP74_HUMAN	TOP1_HUMAN	NFAC2_HUMAN
SR140_HUMAN	HSP7C_HUMAN	TOR2A_HUMAN	NFIC_HUMAN
SRC_HUMAN	HXK1_HUMAN	TPIS_HUMAN	NHP2_HUMAN
SRC8_HUMAN	HYEP_HUMAN	TPM4_HUMAN	NHRF2_HUMAN
SRP09_HUMAN	HYOU1_HUMAN	TRAF1_HUMAN	NLTP_HUMAN
SRP14_HUMAN	ICAM1_HUMAN	TRAM1_HUMAN	NNRD_HUMAN
SRRT_HUMAN	IDH3A_HUMAN	TRAP1_HUMAN	NNRE_HUMAN
SRS10_HUMAN	IDH3B_HUMAN	TRPV4_HUMAN	NOL7_HUMAN
SRSF5_HUMAN	IDH3G_HUMAN	TRXR1_HUMAN	NOLC1_HUMAN
SRSF6_HUMAN	IDHC_HUMAN	TXD17_HUMAN	NONO_HUMAN
ST1A3_HUMAN	IDHP_HUMAN	TXND5_HUMAN	NOP16_HUMAN
ST38L_HUMAN	IF16_HUMAN	UB2L3_HUMAN	NOP56_HUMAN
STIP1_HUMAN	IF2A_HUMAN	UBA6_HUMAN	NP1L1_HUMAN
STML2_HUMAN	IF2B_HUMAN	UBC9_HUMAN	NP1L4_HUMAN
STT3B_HUMAN	IF2B2_HUMAN	UBE2N_HUMAN	NPM_HUMAN
STXB6_HUMAN	IF2B3_HUMAN	UBP5_HUMAN	NQO1_HUMAN
SYAC_HUMAN	IF2G_HUMAN	UGDH_HUMAN	NUAK2_HUMAN
SYDM_HUMAN	IF2P_HUMAN	UGPA_HUMAN	NUCB1_HUMAN
SYG_HUMAN	IF4A3_HUMAN	VAPA_HUMAN	NUCB2_HUMAN
SYHC_HUMAN	IF4B_HUMAN	VAPB_HUMAN	NUCL_HUMAN
SYIC_HUMAN	IF4G1_HUMAN	VASP_HUMAN	NUP50_HUMAN
SYIM_HUMAN	IF5_HUMAN	VATB2_HUMAN	ODP2_HUMAN
SYK_HUMAN	IF5A1_HUMAN	VDAC2_HUMAN	OFUT1_HUMAN
SYLC_HUMAN	IL1AP_HUMAN	VIGLN_HUMAN	OLA1_HUMAN
SYNC_HUMAN	ILF2_HUMAN	VIME_HUMAN	OXSR1_HUMAN
SYRC_HUMAN	ILF3_HUMAN	VINC_HUMAN	P2RX7_HUMAN
SYVC_HUMAN	IMB1_HUMAN	WDR1_HUMAN	P3H1_HUMAN
SYWC_HUMAN	IMDH2_HUMAN	XPO1_HUMAN	P5CR2_HUMAN
SYYC_HUMAN	INO1_HUMAN	XPO2_HUMAN	P5CS_HUMAN
TALDO_HUMAN	IPYR2_HUMAN	XRCC5_HUMAN	PA1B2_HUMAN
TBB5_HUMAN	IQGA1_HUMAN	XRCC6_HUMAN	PA2G4_HUMAN
TCEA1_HUMAN	IQGA3_HUMAN	YKT6_HUMAN	PABP1_HUMAN
TCOF_HUMAN	ISG15_HUMAN		PABP4_HUMAN
TCP4_HUMAN	ISOC2_HUMAN		PADI4_HUMAN
TCPB_HUMAN	ITA3_HUMAN		PAF15_HUMAN
TCPG_HUMAN	ITA5_HUMAN		PAIRB_HUMAN
TCPZ_HUMAN	ITAV_HUMAN		PALLD_HUMAN
TCTP_HUMAN	ITB1_HUMAN		PAN3_HUMAN
TDRD7_HUMAN	IVD_HUMAN		PAPS2_HUMAN
TECR_HUMAN	JIP4_HUMAN		PARK7_HUMAN
TFAM_HUMAN	JPH2_HUMAN		PARN_HUMAN
TFR1_HUMAN	K0020_HUMAN		PARP1_HUMAN
THIL_HUMAN	K1C18_HUMAN		PARVA_HUMAN
THIO_HUMAN	K6PF_HUMAN		PAXI_HUMAN
TIAR_HUMAN	KAD1_HUMAN		PCBP1_HUMAN
TIM9_HUMAN	KAD2_HUMAN		PCNA_HUMAN
TKT_HUMAN	KAD4_HUMAN		PCNP_HUMAN
TLN1_HUMAN	KAPCA_HUMAN		PCY1A_HUMAN
TMEDA_HUMAN	KAT3_HUMAN		PDCD6_HUMAN
TMX1_HUMAN	KCC1D_HUMAN		PDE12_HUMAN
TOM70_HUMAN	KCC2B_HUMAN		PDE1C_HUMAN
TOR1A_HUMAN	KCC2D_HUMAN		PDIA1_HUMAN
TPD55_HUMAN	KCC2G_HUMAN		PDIA3_HUMAN
TRAP1_HUMAN	KCY_HUMAN		PDIA4_HUMAN
TRUA_HUMAN	KHDR1_HUMAN		PDIA6_HUMAN
TSSC4_HUMAN	KLHL1_HUMAN		PDLI1_HUMAN
TXD17_HUMAN	KPCD1_HUMAN		PEBP1_HUMAN
TXTP_HUMAN	KPYM_HUMAN		PESC_HUMAN
UB2L3_HUMAN	KS6A1_HUMAN		PFD1_HUMAN
UB2V1_HUMAN	KTN1_HUMAN		PFD4_HUMAN
UBC12_HUMAN	L1CAM_HUMAN		PFD5_HUMAN
UBP14_HUMAN	LAMB1_HUMAN		PGK1_HUMAN
VAT1_HUMAN	LANC1_HUMAN		PGM1_HUMAN
VDAC1_HUMAN	LAP2B_HUMAN		PHB_HUMAN
VDAC2_HUMAN	LASP1_HUMAN		PHB2_HUMAN
VIGLN_HUMAN	LAT1_HUMAN		PHF5A_HUMAN
VIME_HUMAN	LBR_HUMAN		PHLA1_HUMAN
VINC_HUMAN	LC7L2_HUMAN		PHP14_HUMAN
VWA3B_HUMAN	LCK_HUMAN		PI42A_HUMAN
XRCC5_HUMAN	LDHA_HUMAN		PI42C_HUMAN
XYLK_HUMAN	LDHB_HUMAN		PI4KA_HUMAN
ZMY11_HUMAN	LEG1_HUMAN		PIN1_HUMAN
	LEG3_HUMAN		PLBL2_HUMAN
	LETM1_HUMAN		PLEC_HUMAN
	LIMA1_HUMAN		PLIN3_HUMAN
	LIPB1_HUMAN		PLK1_HUMAN
	LMAN1_HUMAN		PLOD1_HUMAN
	LMNA_HUMAN		PLOD2_HUMAN
	LMNB1_HUMAN		PNPT1_HUMAN
	LMNB2_HUMAN		PODXL_HUMAN
	LMO7_HUMAN		PP1A_HUMAN
	LONM_HUMAN		PPAC_HUMAN
	LOXL2_HUMAN		PPIA_HUMAN
	LPPRC_HUMAN		PPIC_HUMAN
	LRC59_HUMAN		PPIF_HUMAN
	LSM7_HUMAN		PPR18_HUMAN
	LYN_HUMAN		PPT1_HUMAN
	LYRM7_HUMAN		PRC2C_HUMAN
	LZTS1_HUMAN		PRDBP_HUMAN
	M4K5_HUMAN		PRDX2_HUMAN
	MAFG_HUMAN		PRDX4_HUMAN
	MAGAA_HUMAN		PRDX6_HUMAN
	MAOM_HUMAN		PRKDC_HUMAN
	MAP11_HUMAN		PROS_HUMAN
	MAP1B_HUMAN		PRP19_HUMAN
	MAP4_HUMAN		PRP8_HUMAN
	MARCS_HUMAN		PRPF3_HUMAN
	MARE1_HUMAN		PRRC1_HUMAN
	MARE2_HUMAN		PRS10_HUMAN
	MARK2_HUMAN		PRS4_HUMAN
	MARK3_HUMAN		PRS7_HUMAN
	MATR3_HUMAN		PRS8_HUMAN
	MBNL1_HUMAN		PSA4_HUMAN
	MCCA_HUMAN		PSA5_HUMAN
	MCCB_HUMAN		PSA6_HUMAN
	MCES_HUMAN		PSB10_HUMAN
	MCM2_HUMAN		PSB5_HUMAN
	MCM4_HUMAN		PSD11_HUMAN
	MCM5_HUMAN		PSIP1_HUMAN
	MCM6_HUMAN		PSMD4_HUMAN
	MCM7_HUMAN		PSMD7_HUMAN
	MCTS1_HUMAN		PSMD9_HUMAN
	MDHC_HUMAN		PTBP1_HUMAN
	MDHM_HUMAN		PTK7_HUMAN
	MECR_HUMAN		PTN12_HUMAN
	MELPH_HUMAN		PTN14_HUMAN
	MESH1_HUMAN		PTRF_HUMAN
	MFAP1_HUMAN		PUF60_HUMAN
	MGST3_HUMAN		PUR2_HUMAN
	MICA1_HUMAN		PUR4_HUMAN
	MID51_HUMAN		PUR6_HUMAN
	MLKL_HUMAN		PUR9_HUMAN
	MMP2_HUMAN		PURB_HUMAN
	MMSA_HUMAN		PYGB_HUMAN
	MOES_HUMAN		PYGL_HUMAN
	MP2K4_HUMAN		QCR1_HUMAN
	MP2K6_HUMAN		QCR2_HUMAN
	MPCP_HUMAN		QOR_HUMAN
	MPPB_HUMAN		RAB10_HUMAN
	MPRIP_HUMAN		RAB13_HUMAN
	MPV17_HUMAN		RAB1A_HUMAN
	MPZL1_HUMAN		RAB7A_HUMAN
	MRP_HUMAN		RAD21_HUMAN
	MRRP1_HUMAN		RADI_HUMAN
	MSH6_HUMAN		RAN_HUMAN
	MSPD2_HUMAN		RBM25_HUMAN
	MTA2_HUMAN		RBMX_HUMAN
	MTA3_HUMAN		RCC1_HUMAN
	MTDC_HUMAN		RECQ1_HUMAN
	MTHFS_HUMAN		RENT1_HUMAN
	MTU1_HUMAN		RL10_HUMAN
	MUC18_HUMAN		RL13A_HUMAN
	MVP_HUMAN		RL14_HUMAN
	MXRA7_HUMAN		RL15_HUMAN
	MY18A_HUMAN		RL17_HUMAN
	MYH10_HUMAN		RL18_HUMAN
	MYH11_HUMAN		RL18A_HUMAN
	MYH9_HUMAN		RL19_HUMAN
	MYL6_HUMAN		RL22_HUMAN
	MYLK_HUMAN		RL22L_HUMAN
	MYO1B_HUMAN		RL24_HUMAN
	MYO1C_HUMAN		RL26_HUMAN
	MYO5A_HUMAN		RL27_HUMAN
	MYOF_HUMAN		RL28_HUMAN
	NAA50_HUMAN		RL3_HUMAN
	NACAM_HUMAN		RL30_HUMAN
	NAGAB_HUMAN		RL34_HUMAN
	NAKD2_HUMAN		RL35A_HUMAN
	NAMPT_HUMAN		RL37_HUMAN
	NASP_HUMAN		RL4_HUMAN
	NAT10_HUMAN		RL5_HUMAN
	NB5R1_HUMAN		RL6_HUMAN
	NB5R3_HUMAN		RL7_HUMAN
	NCPR_HUMAN		RL7A_HUMAN
	NDKA_HUMAN		RL8_HUMAN
	NDUA4_HUMAN		RL9_HUMAN
	NDUA6_HUMAN		RLA0_HUMAN
	NDUA9_HUMAN		RLA1_HUMAN
	NDUAA_HUMAN		RLP24_HUMAN
	NDUB3_HUMAN		RM39_HUMAN
	NDUB6_HUMAN		RM40_HUMAN
	NDUB9_HUMAN		RM54_HUMAN
	NDUS1_HUMAN		ROA0_HUMAN
	NDUS2_HUMAN		ROA1_HUMAN
	NDUS4_HUMAN		ROA2_HUMAN
	NDUS5_HUMAN		ROA3_HUMAN
	NDUS7_HUMAN		ROAA_HUMAN
	NDUV1_HUMAN		ROCK2_HUMAN
	NEK7_HUMAN		RPC9_HUMAN
	NENF_HUMAN		RRBP1_HUMAN
	NIPS1_HUMAN		RRP12_HUMAN
	NIPS2_HUMAN		RRP15_HUMAN
	NNMT_HUMAN		RRS1_HUMAN
	NNRD_HUMAN		RS10_HUMAN
	NNTM_HUMAN		RS11_HUMAN
	NOC3L_HUMAN		RS14_HUMAN
	NOC4L_HUMAN		RS16_HUMAN
	NOG1_HUMAN		RS18_HUMAN
	NOLC1_HUMAN		RS19_HUMAN
	NONO_HUMAN		RS2_HUMAN
	NOP16_HUMAN		RS23_HUMAN
	NOP2_HUMAN		RS24_HUMAN
	NOP56_HUMAN		RS25_HUMAN
	NOP58_HUMAN		RS26_HUMAN
	NPC2_HUMAN		RS27_HUMAN
	NPM_HUMAN		RS27A_HUMAN
	NQO1_HUMAN		RS28_HUMAN
	NSA2_HUMAN		RS3_HUMAN
	NSF1C_HUMAN		RS30_HUMAN
	NUBPL_HUMAN		RS3A_HUMAN
	NUCKS_HUMAN		RS4X_HUMAN
	NUCL_HUMAN		RS4Y1_HUMAN
	NUDC_HUMAN		RS5_HUMAN
	NUDT9_HUMAN		RS6_HUMAN
	NUMA1_HUMAN		RS8_HUMAN
	O51F1_HUMAN		RS9_HUMAN
	OAS1_HUMAN		RSMB_HUMAN
	OASL_HUMAN		RT17_HUMAN
	OAT_HUMAN		RTCB_HUMAN
	ODO1_HUMAN		RU17_HUMAN
	ODP2_HUMAN		RU2A_HUMAN
	OFUT1_HUMAN		RUVB1_HUMAN
	OGDHL_HUMAN		RUVB2_HUMAN
	OLA1_HUMAN		S100B_HUMAN
	OPA1_HUMAN		S10A4_HUMAN
	OSBL1_HUMAN		S1PR2_HUMAN
	OSGEP_HUMAN		S26A2_HUMAN
	OTUB1_HUMAN		SAHH_HUMAN
	P2RX7_HUMAN		SAP_HUMAN
	P4HA2_HUMAN		SAP3_HUMAN
	P5CR1_HUMAN		SC23A_HUMAN
	P5CS_HUMAN		SCRN1_HUMAN
	PA2G4_HUMAN		SDCB1_HUMAN
	PABP1_HUMAN		SEP11_HUMAN
	PABP2_HUMAN		SEPT7_HUMAN
	PABP4_HUMAN		SEPT9_HUMAN
	PAIRB_HUMAN		SERF2_HUMAN
	PALM2_HUMAN		SERPH_HUMAN
	PARK7_HUMAN		SF3A2_HUMAN
	PARP1_HUMAN		SF3B1_HUMAN
	PARVA_HUMAN		SF3B2_HUMAN
	PCBP1_HUMAN		SFPQ_HUMAN
	PCBP2_HUMAN		SFRP1_HUMAN
	PCKGM_HUMAN		SH3L3_HUMAN
	PCY2_HUMAN		SIAS_HUMAN
	PDIA1_HUMAN		SIAT1_HUMAN
	PDIA3_HUMAN		SIL1_HUMAN
	PDIA4_HUMAN		SLIRP_HUMAN
	PDIA6_HUMAN		SLN11_HUMAN
	PDLI1_HUMAN		SMC1A_HUMAN
	PDLI7_HUMAN		SMC2_HUMAN
	PDPK1_HUMAN		SMC3_HUMAN
	PEBP1_HUMAN		SMCA5_HUMAN
	PELP1_HUMAN		SMCE1_HUMAN
	PEPD_HUMAN		SMD2_HUMAN
	PESC_HUMAN		SMD3_HUMAN
	PFD1_HUMAN		SMRC1_HUMAN
	PFD4_HUMAN		SND1_HUMAN
	PGAM1_HUMAN		SNRPA_HUMAN
	PGBM_HUMAN		SOX10_HUMAN
	PGK1_HUMAN		SP100_HUMAN
	PGM1_HUMAN		SP16H_HUMAN
	PGRC1_HUMAN		SPB6_HUMAN
	PHB_HUMAN		SPEE_HUMAN
	PICAL_HUMAN		SPTB2_HUMAN
	PIN1_HUMAN		SPY4_HUMAN
	PIR_HUMAN		SQSTM_HUMAN
	PKHF2_HUMAN		SRBS2_HUMAN
	PLD2_HUMAN		SRC8_HUMAN
	PLEC_HUMAN		SRP14_HUMAN
	PLOD2_HUMAN		SRPK1_HUMAN
	PLOD3_HUMAN		SRPRB_HUMAN
	PNCB_HUMAN		SRRT_HUMAN
	PP1A_HUMAN		SSXT_HUMAN
	PP1B_HUMAN		STIM1_HUMAN
	PPCS_HUMAN		STIP1_HUMAN
	PPGB_HUMAN		STK10_HUMAN
	PPIA_HUMAN		STK11_HUMAN
	PPIB_HUMAN		STK39_HUMAN
	PPIF_HUMAN		SUMF2_HUMAN
	PPT1_HUMAN		SUMO2_HUMAN
	PR40A_HUMAN		SURF4_HUMAN
	PRAF2_HUMAN		SYCC_HUMAN
	PRDBP_HUMAN		SYDM_HUMAN
	PRDX1_HUMAN		SYEP_HUMAN
	PRDX2_HUMAN		SYFA_HUMAN
	PRDX3_HUMAN		SYG_HUMAN
	PRDX4_HUMAN		SYHC_HUMAN
	PRDX5_HUMAN		SYK_HUMAN
	PRDX6_HUMAN		SYNEM_HUMAN
	PREP_HUMAN		SYQ_HUMAN
	PRKDC_HUMAN		SYUA_HUMAN
	PRP19_HUMAN		SYVC_HUMAN
	PRP6_HUMAN		SYWC_HUMAN
	PRP8_HUMAN		TADBP_HUMAN
	PRPF3_HUMAN		TAGL_HUMAN
	PRPS1_HUMAN		TALDO_HUMAN
	PRPS2_HUMAN		TAOK3_HUMAN
	PRS4_HUMAN		TBB2A_HUMAN
	PRS6A_HUMAN		TBB3_HUMAN
	PRS7_HUMAN		TBB4A_HUMAN
	PRS8_HUMAN		TBB5_HUMAN
	PSA_HUMAN		TBC15_HUMAN
	PSA6_HUMAN		TBCD4_HUMAN
	PSB10_HUMAN		TCOF_HUMAN
	PSB2_HUMAN		TCP4_HUMAN
	PSD12_HUMAN		TCPA_HUMAN
	PSD13_HUMAN		TCPB_HUMAN
	PSIP1_HUMAN		TCPD_HUMAN
	PSMD3_HUMAN		TCPE_HUMAN
	PSMD4_HUMAN		TCPG_HUMAN
	PSMD9_HUMAN		TCPH_HUMAN
	PSME1_HUMAN		TCPQ_HUMAN
	PSPC1_HUMAN		TCPZ_HUMAN
	PTBP1_HUMAN		TECR_HUMAN
	PTCD3_HUMAN		TENS3_HUMAN
	PTH2_HUMAN		TERA_HUMAN
	PTK7_HUMAN		TEX10_HUMAN
	PTMA_HUMAN		TFR1_HUMAN
	PTN1_HUMAN		TGM2_HUMAN
	PTRF_HUMAN		THIL_HUMAN
	PUR2_HUMAN		THIO_HUMAN
	PUR4_HUMAN		TIF1B_HUMAN
	PUR6_HUMAN		TIM44_HUMAN
	PUR8_HUMAN		TIPRL_HUMAN
	PUR9_HUMAN		TLN1_HUMAN
	PURA_HUMAN		TMA7_HUMAN
	PYC_HUMAN		TMED4_HUMAN
	PYGB_HUMAN		TMED9_HUMAN
	PYGL_HUMAN		TMEDA_HUMAN
	PYR1_HUMAN		TOIP1_HUMAN
	QCR1_HUMAN		TOM70_HUMAN
	QCR2_HUMAN		TOP1_HUMAN
	QCR8_HUMAN		TOR1A_HUMAN
	QCR9_HUMAN		TOR2A_HUMAN
	QKI_HUMAN		TOR3A_HUMAN
	QOR_HUMAN		TPIS_HUMAN
	RAB10_HUMAN		TPM1_HUMAN
	RAB21_HUMAN		TPM3_HUMAN
	RAB38_HUMAN		TPM4_HUMAN
	RAB5B_HUMAN		TR150_HUMAN
	RAB5C_HUMAN		TRAP1_HUMAN
	RAB6A_HUMAN		TRIM2_HUMAN
	RAB7A_HUMAN		TRIQK_HUMAN
	RADI_HUMAN		TSN_HUMAN
	RAE1L_HUMAN		TSR1_HUMAN
	RALA_HUMAN		TSYL1_HUMAN
	RALY_HUMAN		TTL12_HUMAN
	RAN_HUMAN		TXND5_HUMAN
	RANG_HUMAN		U520_HUMAN
	RAP1B_HUMAN		UB2L3_HUMAN
	RB27A_HUMAN		UB2V2_HUMAN
	RB39A_HUMAN		UBA1_HUMAN
	RBM12_HUMAN		UBA3_HUMAN
	RBM14_HUMAN		UBA6_HUMAN
	RBMS1_HUMAN		UBCP1_HUMAN
	RBMX_HUMAN		UBE2T_HUMAN
	RBSK_HUMAN		UBF1_HUMAN
	RCC1_HUMAN		UGDH_HUMAN
	RCC2_HUMAN		UGPA_HUMAN
	RCN1_HUMAN		ULK3_HUMAN
	REEP5_HUMAN		UPP1_HUMAN
	RENBP_HUMAN		USMG5_HUMAN
	RENT1_HUMAN		USO1_HUMAN
	RETST_HUMAN		VAPA_HUMAN
	RFA1_HUMAN		VDAC2_HUMAN
	RFC4_HUMAN		VIGLN_HUMAN
	RFX1_HUMAN		VIME_HUMAN
	RINI_HUMAN		VINC_HUMAN
	RL10_HUMAN		VPS72_HUMAN
	RL10A_HUMAN		WBP11_HUMAN
	RL11_HUMAN		WDR1_HUMAN
	RL12_HUMAN		WDR74_HUMAN
	RL13_HUMAN		WNK4_HUMAN
	RL13A_HUMAN		XRCC5_HUMAN
	RL14_HUMAN		XRCC6_HUMAN
	RL15_HUMAN		YBOX1_HUMAN
	RL17_HUMAN		ZCCHV_HUMAN
	RL18_HUMAN		ZN318_HUMAN
	RL18A_HUMAN		ZSWM3_HUMAN
	RL19_HUMAN
	RL1D1_HUMAN
	RL21_HUMAN
	RL22_HUMAN
	RL23_HUMAN
	RL23A_HUMAN
	RL24_HUMAN
	RL27A_HUMAN
	RL28_HUMAN
	RL29_HUMAN
	RL3_HUMAN
	RL30_HUMAN
	RL34_HUMAN
	RL35_HUMAN
	RL36_HUMAN
	RL37_HUMAN
	RL37A_HUMAN
	RL38_HUMAN
	RL4_HUMAN
	RL5_HUMAN
	RL6_HUMAN
	RL7_HUMAN
	RL7A_HUMAN
	RL8_HUMAN
	RL9_HUMAN
	RLA0_HUMAN
	RLA1_HUMAN
	RLBP1_HUMAN
	RM03_HUMAN
	RM11_HUMAN
	RM39_HUMAN
	RM47_HUMAN
	RM49_HUMAN
	RM53_HUMAN
	ROA0_HUMAN
	ROA1_HUMAN
	ROA2_HUMAN
	ROAA_HUMAN
	ROCK2_HUMAN
	RPB11_HUMAN
	RPB2_HUMAN
	RPN1_HUMAN
	RPN2_HUMAN
	RRBP1_HUMAN
	RRP1B_HUMAN
	RRP5_HUMAN
	RS10_HUMAN
	RS11_HUMAN
	RS12_HUMAN
	RS13_HUMAN
	RS16_HUMAN
	RS17_HUMAN
	RS2_HUMAN
	RS20_HUMAN
	RS21_HUMAN
	RS24_HUMAN
	RS27A_HUMAN
	RS3_HUMAN
	RS30_HUMAN
	RS3A_HUMAN
	RS4X_HUMAN
	RS5_HUMAN
	RS7_HUMAN
	RS8_HUMAN
	RS9_HUMAN
	RSSA_HUMAN
	RSU1_HUMAN
	RT07_HUMAN
	RT11_HUMAN
	RT15_HUMAN
	RT17_HUMAN
	RT22_HUMAN
	RT29_HUMAN
	RT35_HUMAN
	RTCB_HUMAN
	RTN3_HUMAN
	RTN4_HUMAN
	RUXF_HUMAN
	S100B_HUMAN
	S10A1_HUMAN
	S10A6_HUMAN
	S10AA_HUMAN
	S10AG_HUMAN
	S12A6_HUMAN
	S4A7_HUMAN
	S61A1_HUMAN
	SAC2_HUMAN
	SAE2_HUMAN
	SAFB2_HUMAN
	SAHH_HUMAN
	SAP_HUMAN
	SAP3_HUMAN
	SBDS_HUMAN
	SC22B_HUMAN
	SC61B_HUMAN
	SCAM3_HUMAN
	SCMC1_HUMAN
	SCOT1_HUMAN
	SCPDL_HUMAN
	SCRB2_HUMAN
	SDCB1_HUMAN
	SDHA_HUMAN
	SDPR_HUMAN
	SEC62_HUMAN
	SEM3A_HUMAN
	SEPT2_HUMAN
	SEPT7_HUMAN
	SEPT9_HUMAN
	SERP1_HUMAN
	SERPH_HUMAN
	SET_HUMAN
	SF3A1_HUMAN
	SF3A2_HUMAN
	SF3B1_HUMAN
	SF3B2_HUMAN
	SF3B3_HUMAN
	SF3B6_HUMAN
	SFPQ_HUMAN
	SFXN1_HUMAN
	SGTA_HUMAN
	SH3K1_HUMAN
	SHPS1_HUMAN
	SIAS_HUMAN
	SIAT1_HUMAN
	SIL1_HUMAN
	SKIV2_HUMAN
	SLIRP_HUMAN
	SMC1A_HUMAN
	SMC3_HUMAN
	SMC4_HUMAN
	SMCA5_HUMAN
	SMD1_HUMAN
	SMD2_HUMAN
	SMD3_HUMAN
	SND1_HUMAN
	SNR40_HUMAN
	SNRPA_HUMAN
	SNUT2_HUMAN
	SNX1_HUMAN
	SNX2_HUMAN
	SNX3_HUMAN
	SNX5_HUMAN
	SODC_HUMAN
	SOX10_HUMAN
	SP16H_HUMAN
	SPB6_HUMAN
	SPCS3_HUMAN
	SPEE_HUMAN
	SPF27_HUMAN
	SPP2A_HUMAN
	SPRE_HUMAN
	SPSY_HUMAN
	SPTB1_HUMAN
	SPTB2_HUMAN
	SPTN1_HUMAN
	SRBS2_HUMAN
	SRC8_HUMAN
	SRP09_HUMAN
	SRP68_HUMAN
	SRPRB_HUMAN
	SRRM1_HUMAN
	SRRT_HUMAN
	SRS10_HUMAN
	SRSF1_HUMAN
	SRSF2_HUMAN
	SRSF6_HUMAN
	SSDH_HUMAN
	SSRB_HUMAN
	ST38L_HUMAN
	STIP1_HUMAN
	STK10_HUMAN
	STK25_HUMAN
	STK38_HUMAN
	STK4_HUMAN
	STMN1_HUMAN
	STMN2_HUMAN
	STRAP_HUMAN
	STX3_HUMAN
	STX7_HUMAN
	STXB1_HUMAN
	SUCB2_HUMAN
	SUMO1_HUMAN
	SYAC_HUMAN
	SYEP_HUMAN
	SYFA_HUMAN
	SYFB_HUMAN
	SYG_HUMAN
	SYHC_HUMAN
	SYIC_HUMAN
	SYIM_HUMAN
	SYJ2B_HUMAN
	SYK_HUMAN
	SYLC_HUMAN
	SYNC_HUMAN
	SYNM_HUMAN
	SYNPO_HUMAN
	SYQ_HUMAN
	SYRC_HUMAN
	SYSC_HUMAN
	SYSM_HUMAN
	SYT10_HUMAN
	SYTC_HUMAN
	SYTC2_HUMAN
	SYUA_HUMAN
	SYVC_HUMAN
	SYWC_HUMAN
	SYYC_HUMAN
	SYYM_HUMAN
	T126A_HUMAN
	T2FB_HUMAN
	TADBP_HUMAN
	TAGL_HUMAN
	TAGL2_HUMAN
	TALDO_HUMAN
	TAOK2_HUMAN
	TAOK3_HUMAN
	TARA_HUMAN
	TATD1_HUMAN
	TBB2A_HUMAN
	TBB3_HUMAN
	TBB8_HUMAN
	TBCA_HUMAN
	TBCD4_HUMAN
	TBRG4_HUMAN
	TCEA1_HUMAN
	TCOF_HUMAN
	TCP4_HUMAN
	TCPA_HUMAN
	TCPD_HUMAN
	TCPQ_HUMAN
	TCPZ_HUMAN
	TCTP_HUMAN
	TDIF1_HUMAN
	TERA_HUMAN
	TES_HUMAN
	TEX10_HUMAN
	TFAM_HUMAN
	TFR1_HUMAN
	THEM4_HUMAN
	THIC_HUMAN
	THIK_HUMAN
	THIL_HUMAN
	THIM_HUMAN
	THIO_HUMAN
	THOC4_HUMAN
	THTR_HUMAN
	THYN1_HUMAN
	TIAR_HUMAN
	TIF1B_HUMAN
	TIM50_HUMAN
	TKT_HUMAN
	TLK1_HUMAN
	TLN1_HUMAN
	TM109_HUMAN
	TM201_HUMAN
	TM9S2_HUMAN
	TMA7_HUMAN
	TMM43_HUMAN
	TMOD3_HUMAN
	TOIP1_HUMAN
	TOP1_HUMAN
	TOR1A_HUMAN
	TOR1B_HUMAN
	TOR3A_HUMAN
	TPD52_HUMAN
	TPD54_HUMAN
	TPIS_HUMAN
	TPM1_HUMAN
	TPM3_HUMAN
	TPM4_HUMAN
	TPMT_HUMAN
	TPR_HUMAN
	TR150_HUMAN
	TRAP1_HUMAN
	TRXR1_HUMAN
	TSN_HUMAN
	TSNAX_HUMAN
	TSR1_HUMAN
	TTL_HUMAN
	TXD12_HUMAN
	TXND5_HUMAN
	TYB10_HUMAN
	TYRP2_HUMAN
	U2AF2_HUMAN
	U520_HUMAN
	UB2L3_HUMAN
	UBA3_HUMAN
	UBA6_HUMAN
	UBE2N_HUMAN
	UBF1_HUMAN
	UBP5_HUMAN
	UBP7_HUMAN
	UGDH_HUMAN
	UGGG1_HUMAN
	UGPA_HUMAN
	UNC79_HUMAN
	USF2_HUMAN
	USO1_HUMAN
	UTP11_HUMAN
	VAPA_HUMAN
	VAPB_HUMAN
	VASP_HUMAN
	VAT1_HUMAN
	VATA_HUMAN
	VATB2_HUMAN
	VCAM1_HUMAN
	VDAC2_HUMAN
	VDAC3_HUMAN
	VEGFC_HUMAN
	VIGLN_HUMAN
	VIME_HUMAN
	VINC_HUMAN
	VPP1_HUMAN
	VWA8_HUMAN
	WDR1_HUMAN
	WDR43_HUMAN
	WFS1_HUMAN
	XCT_HUMAN
	XPO1_HUMAN
	XPO2_HUMAN
	XPP1_HUMAN
	XRCC6_HUMAN
	YBOX1_HUMAN
	YBOX3_HUMAN
	ZN425_HUMAN
	ZYX_HUMAN

## Sheet: Supp. Table 1D
Supplementary Table 1d. List of kinases that are significantly different (p-value < 0.05) in the isogenic naive and resistant cell lines (only leading protein shown) from database search of individual cell line models with ABPP(Figure 1A)
A375	WM164	1205Lu	WM793
ABL2_HUMAN	AAPK1_HUMAN	BRAF_HUMAN	AAPK1_HUMAN
CDK1_HUMAN	ACVR1_HUMAN	BUB1_HUMAN	AKT3_HUMAN
CSK_HUMAN	AURKA_HUMAN	CDK1_HUMAN	AURKA_HUMAN
EGFR_HUMAN	CD11B_HUMAN	CDK14_HUMAN	CDK1_HUMAN
EPHA2_HUMAN	CDK14_HUMAN	CDK19_HUMAN	CDK14_HUMAN
ERN1_HUMAN	CDK2_HUMAN	CDK2_HUMAN	FYN_HUMAN
FAK1_HUMAN	CDK5_HUMAN	CDK5_HUMAN	GWL_HUMAN
ILK_HUMAN	CSK21_HUMAN	E2AK2_HUMAN	HCK_HUMAN
KC1G3_HUMAN	CSK22_HUMAN	E2AK4_HUMAN	ILK_HUMAN
KCC2G_HUMAN	CSKP_HUMAN	EGFR_HUMAN	KCC1D_HUMAN
KPCD1_HUMAN	E2AK2_HUMAN	FAK1_HUMAN	KCC2D_HUMAN
KS6B2_HUMAN	EGFR_HUMAN	GSK3B_HUMAN	KCC2G_HUMAN
LATS2_HUMAN	EPHA2_HUMAN	IKKE_HUMAN	KPCD1_HUMAN
M4K3_HUMAN	EPHA5_HUMAN	KC1A_HUMAN	KS6A5_HUMAN
M4K5_HUMAN	FAK1_HUMAN	KPCD_HUMAN	M4K5_HUMAN
MARK3_HUMAN	FYN_HUMAN	KPCI_HUMAN	MARK3_HUMAN
MAST4_HUMAN	KAPCA_HUMAN	KS6A1_HUMAN	MAST3_HUMAN
MLKL_HUMAN	KCC1D_HUMAN	KS6A3_HUMAN	MK01_HUMAN
MP2K3_HUMAN	KCC2B_HUMAN	KS6A5_HUMAN	MLKL_HUMAN
MP2K7_HUMAN	KCC2D_HUMAN	KS6B2_HUMAN	MP2K2_HUMAN
MYLK3_HUMAN	KCC2G_HUMAN	M3K2_HUMAN	MP2K6_HUMAN
NUAK2_HUMAN	KPCD1_HUMAN	M4K5_HUMAN	NEK9_HUMAN
PRKDC_HUMAN	KS6A1_HUMAN	MK10_HUMAN	NUAK2_HUMAN
ROCK2_HUMAN	LCK_HUMAN	MP2K3_HUMAN	OXSR1_HUMAN
SLK_HUMAN	LYN_HUMAN	NEK4_HUMAN	PAN3_HUMAN
SRC_HUMAN	M4K5_HUMAN	NUAK2_HUMAN	PLK1_HUMAN
ST38L_HUMAN	MARK2_HUMAN	PAK2_HUMAN	PRKDC_HUMAN
	MARK3_HUMAN	PRKDC_HUMAN	PTK7_HUMAN
	MLKL_HUMAN	RIOK2_HUMAN	ROCK2_HUMAN
	MP2K4_HUMAN	ST38L_HUMAN	SRPK1_HUMAN
	MP2K6_HUMAN	STK10_HUMAN	STK10_HUMAN
	MYLK_HUMAN	TLK1_HUMAN	STK11_HUMAN
	NEK7_HUMAN		STK39_HUMAN
	PDPK1_HUMAN		TAOK3_HUMAN
	PRKDC_HUMAN		ULK3_HUMAN
	PTK7_HUMAN		WNK4_HUMAN
	ROCK2_HUMAN
	ST38L_HUMAN
	STK10_HUMAN
	STK25_HUMAN
	STK38_HUMAN
	STK4_HUMAN
	TAOK2_HUMAN
	TAOK3_HUMAN
	TLK1_HUMAN

## Sheet: Supp. Table 2A
Supplementary Table 2A. List of filtered DBT-peptides and the associated fold change and p-value used for creating Figure 1C & 1D. For simplicity, only the leading protein mapping to the peptide is shown and the total proteins containg the DBT-peptide is listed in separate column.
id	Representative Protein	Uniprot ID	Kinase	DBT-ATP Sequence	Modification Sites	Shared Proteins	Sig. UP Resistant Group	Sig. UP Naïve Group	fold change(Res-Naive)	`-log10(p-value)
2772	P07948	LYN_HUMAN	Yes	_EGAK(de)FPIKWTAPEAINFGCFTIK_	404	3	YES	NO	4.52002	1.57411
9236	P78527	PRKDC_HUMAN	Yes	_GYGIFAGPCK(de)VINAK_	374	1	YES	NO	3.01839	1.59139
9926	Q05397	FAK1_HUMAN	Yes	_GK(de)IPIK_	583	1	YES	NO	3.30568	1.63179
10764	Q13557	KCC2D_HUMAN	Yes	_MITINPAK(de)R_	259	2	YES	NO	2.65405	1.62862
14188	Q9H2G2	SLK_HUMAN	Yes	_ETSVIAAAK(de)VIDTK_	63	1	YES	NO	4.81784	1.98654
22	A6NCE7	MP3B2_HUMAN	No	_TK(de)FIVPDHVNMSEIIK_	51	2	YES	NO	4.24785	2.01324
209	O00151	PDLI1_HUMAN	No	_VAASIGNAQKIPMCDK(de)CGTGIVGVFVK_	262	1	YES	NO	4.90116	2.16912
211	O00151	PDLI1_HUMAN	No	_QK(de)GHFFVEDQIYCEK_	296	1	YES	NO	4.96495	2.22592
212	O00151	PDLI1_HUMAN	No	_IK(de)GCTDNITITVAR_	71	1	YES	NO	5.28369	2.47559
638	O15173	PGRC2_HUMAN	No	_K(de)RDFSIEQIR_	100	1	YES	NO	4.22806	2.85231
780	O43242	PSMD3_HUMAN	No	_EIDTVTIEDIKEHVK(de)QIEK_	80	1	YES	NO	3.90425	1.7637
921	O43707	ACTN4_HUMAN	No	_ISIEMNGTIEDQISHIK(de)QYER_	691	1	YES	NO	5.88248	2.13912
968	O43795	MYO1B_HUMAN	No	_DISQAMWK(de)ASHAIIK_	544	1	YES	NO	3.50153	1.36253
975	O43795	MYO1B_HUMAN	No	_SIFPEGNPAK(de)INIK_	561	1	YES	NO	3.37328	1.75216
1069	O60506	HNRPQ_HUMAN	No	_SGK(de)HIGVCISVANNR_	232	1	YES	NO	3.73083	1.71568
1106	O60716	CTND1_HUMAN	No	_K(de)SDFQVNINNASR_	846	1	YES	NO	3.28812	1.57555
1307	O75369	FLNB_HUMAN	No	_VFGPGIEGK(de)DVFR_	1241	1	YES	NO	2.97234	1.36876
1308	O75369	FLNB_HUMAN	No	_QTPK(de)QR_	142;169;162	3	YES	NO	2.87989	1.45736
1475	O75718	CRTAP_HUMAN	No	_FIQFAYFK(de)ANNIPK_	157	1	YES	NO	2.86665	1.37046
1488	O75821	EIF3G_HUMAN	No	_KASK(de)AVAR_	94	1	YES	NO	4.33913	1.73707
1622	O94875	SRBS2_HUMAN	No	_TQTYRPISK(de)SHSDNSPNAFK_	151	1	YES	NO	3.18575	2.00326
1667	O94979	SC31A_HUMAN	No	_K(de)IDDASK_	1142	1	YES	NO	3.10249	1.85399
1718	O95302	FKBP9_HUMAN	No	_EMCVGEK(de)R_	441	2	YES	NO	2.97363	1.44048
1731	O95340	PAPS2_HUMAN	No	_AGEIK(de)GFTGIDSDYEKPETPER_	173	1	YES	NO	4.2216	1.671
1732	O95340	PAPS2_HUMAN	No	_DIHEIFVPENK(de)IDHVR_	233	1	YES	NO	5.13532	3.64004
2010	P02511	CRYAB_HUMAN	No	_TIPITREEK(de)PAVTAAPK_	166	1	YES	NO	4.17018	1.38573
2012	P02511	CRYAB_HUMAN	No	_IEK(de)DRFSVNIDVK_	72	1	YES	NO	6.14375	2.16547
2127	P04083	ANXA1_HUMAN	No	_MYGISICQAIIDETK(de)GDYEK_	332	1	YES	NO	4.40005	1.32802
2135	P04083	ANXA1_HUMAN	No	_NAIISIAK(de)GDRSEDFGVNEDIADSDAR_	185	1	YES	NO	5.26076	1.4018
2136	P04083	ANXA1_HUMAN	No	_SSK(de)GGPGSAVSPYPTFNPSSDVAAIHK_	29	1	YES	NO	5.33418	1.40504
2590	P07305	H10_HUMAN	No	_K(de)STDHPK_	21	1	YES	NO	2.96344	1.4325
2608	P07355	ANXA2_HUMAN	No	_RK(de)GTDVPK_	206	2	YES	NO	3.55018	1.56657
2611	P07355	ANXA2_HUMAN	No	_TDIEK(de)DIISDTSGDFRK_	157	2	YES	NO	3.8828	1.30514
2884	P08243	ASNS_HUMAN	No	_ETFEDSNIIPK(de)EIIWRPK_	460	1	YES	NO	3.43567	1.4061
3465	P11586	C1TC_HUMAN	No	_MHGGGPTVTAGIPIPK(de)AYIQENIEIVEK_	721	1	YES	NO	2.8852	1.38846
3515	P12081	SYHC_HUMAN	No	_IEAIEEK(de)IR_	403	1	YES	NO	3.24047	1.69987
3599	P12814	ACTN1_HUMAN	No	_IHKPPK(de)VQEK_	327	1	YES	NO	3.22853	1.40448
3978	P15311	EZRI_HUMAN	No	_ITEAEK(de)NER_	523	1	YES	NO	2.80435	1.43083
4090	P16615	AT2A2_HUMAN	No	_NAENAIEAIKEYEPEMGK(de)VYR_	128	2	YES	NO	3.12024	1.33478
4302	P18206	VINC_HUMAN	No	_EAEAASIK(de)IR_	1115	1	YES	NO	3.12067	1.32094
4308	P18206	VINC_HUMAN	No	_IIGAVAK(de)VR_	830	1	YES	NO	4.73686	1.89238
4310	P18206	VINC_HUMAN	No	_INQAK(de)GWIRDPSASPGDAGEQAIR_	281	1	YES	NO	3.30184	1.57054
4315	P18206	VINC_HUMAN	No	_NFTVEK(de)MSAEINEIIR_	236	1	YES	NO	4.23301	3.12472
4317	P18206	VINC_HUMAN	No	_TNISDEESEQATEMIVHNAQNIMQSVK(de)ETVR_	1103	1	YES	NO	3.13608	1.48894
4437	P19623	SPEE_HUMAN	No	_NPSTNFQEPVQPITQQQVAQMQIK(de)YYNSDVHR_	277	1	YES	NO	3.55714	1.71332
4520	P20962	PTMS_HUMAN	No	_SVEAAAEISAK(de)DIK_	15	1	YES	NO	4.98503	1.56983
4558	P21333	FLNA_HUMAN	No	_AWGPGIEGGVVGK(de)SADFVVEAIGDDVGTIGFSVEGPSQAK_	593	1	YES	NO	3.84205	1.57572
4586	P21333	FLNA_HUMAN	No	_SKGAGGQGK(de)VASK_	1003	1	YES	NO	3.59398	1.60738
4621	P21333	FLNA_HUMAN	No	_VK(de)MDCQECPEGYRVTYTPMAPGSYIISIK_	2473	1	YES	NO	3.97606	1.78483
4798	P23193	TCEA1_HUMAN	No	_KMDK(de)MVQK_	14	1	YES	NO	4.24636	1.71524
5273	P27816	MAP4_HUMAN	No	_HVPGGGNVQIQNK(de)K_	1028	1	YES	NO	3.50105	1.62844
5847	P35052	GPC1_HUMAN	No	_K(de)VAQVPIGPECSR_	236	1	YES	NO	3.64546	2.06904
5934	P35579	MYH9_HUMAN	No	_SMMQDREDQSIICTGESGAGK(de)TENTK_	180	1	YES	NO	3.69121	1.46444
5946	P35579	MYH9_HUMAN	No	_FISNGHVTIPGQQDK(de)DMFQETMEAMR_	316	1	YES	NO	5.23713	2.23449
5953	P35579	MYH9_HUMAN	No	_IAEFTTNITEEEEKSK(de)SIAK_	1016	1	YES	NO	4.73388	1.55497
6586	P41252	SYIC_HUMAN	No	_TIK(de)EQGR_	382	1	YES	NO	3.98022	1.72138
6801	P45877	PPIC_HUMAN	No	_IVIGIFGK(de)VVPK_	61	1	YES	NO	2.66697	1.42787
6960	P46821	MAP1B_HUMAN	No	_K(de)SSTPISEAK_	741	1	YES	NO	2.87038	1.56571
6962	P46821	MAP1B_HUMAN	No	_SAK(de)TATAGPGTTK_	2333	1	YES	NO	2.70998	1.30102
7100	P48426	PI42A_HUMAN	No	_TVK(de)HGAGAEISTVNPEQYSKR_	378	2	YES	NO	3.02666	1.5077
7692	P51858	HDGF_HUMAN	No	_AGDIIEDSPK(de)RPK_	167	1	YES	NO	3.04741	1.46942
7825	P52943	CRIP2_HUMAN	No	_VSSIGK(de)DWHK_	23	1	YES	NO	3.09107	1.87081
8107	P55084	ECHB_HUMAN	No	_AIAMGYKPK(de)AYIR_	334	1	YES	NO	3.70262	1.47657
8119	P55084	ECHB_HUMAN	No	_SHSIAK(de)K_	253	1	YES	NO	3.36373	1.57693
8126	P55145	MANF_HUMAN	No	_YAPK(de)AASAR_	174	1	YES	NO	4.2626	1.93823
8227	P56199	ITA1_HUMAN	No	_K(de)VIQDCEDENIQR_	292	1	YES	NO	2.66185	1.62929
8499	P61353	RL27_HUMAN	No	_EAK(de)VKFEER_	115	1	YES	NO	3.002	1.78623
8874	P62888	RL30_HUMAN	No	_IQIVMK(de)SGK_	23	1	YES	NO	3.83654	1.34613
8970	P63010	AP2B1_HUMAN	No	_K(de)TAAVCVAK_	139	2	YES	NO	3.72623	2.13625
9043	P63267	ACTH_HUMAN	No	_K(de)DIYANNVISGGTTMYPGIADR_	292;293	3	YES	NO	4.17854	1.41578
9045	P63267	ACTH_HUMAN	No	_VAPEEHPTIITEAPINPK(de)ANREK_	114;115	4	YES	NO	5.15223	1.40455
9061	P67936	TPM4_HUMAN	No	_AEVSEIK(de)CGDIEEEIKNVTNNIK_	153	1	YES	NO	4.501	1.46635
9731	Q01995	TAGL_HUMAN	No	_EFTESQIQEGK(de)HVIGIQM(ox)GSNR_	172	1	YES	NO	5.03977	1.53748
9735	Q01995	TAGL_HUMAN	No	_IGFQVWIK(de)NGVIISK_	57	1	YES	NO	3.96066	1.52982
9945	Q05682	CALD1_HUMAN	No	_SVQK(de)SSGVK_	659	1	YES	NO	2.69761	1.68838
9958	Q05682	CALD1_HUMAN	No	_IREEEEK(de)R_	601	1	YES	NO	4.32365	1.58439
10037	Q07065	CKAP4_HUMAN	No	_TAVDSIVAYSVK(de)IETNENNIESAK_	566	1	YES	NO	4.83051	1.62476
10151	Q09666	AHNK_HUMAN	No	_APK(de)IPMPDFDIHIKGPK_	2962	1	YES	NO	4.23705	1.53936
10172	Q09666	AHNK_HUMAN	No	_IKFPTMK(de)VPK_	310	1	YES	NO	3.73691	1.62484
10195	Q09666	AHNK_HUMAN	No	_MPFISISSPK(de)VSMPDVEINIK_	3414	1	YES	NO	3.2701	1.45789
10196	Q09666	AHNK_HUMAN	No	_FK(de)MPSMNIQTHK_	1568	1	YES	NO	3.37472	1.33703
10234	Q09666	AHNK_HUMAN	No	_IKFPK(de)FSMPK_	5235	1	YES	NO	3.07093	1.31097
10268	Q09666	AHNK_HUMAN	No	_K(de)GDRSPEPGQTWTR_	89	1	YES	NO	3.06099	1.81772
10310	Q09666	AHNK_HUMAN	No	_VDIDVPDVDVQGPDWHIK(de)MPK_	4187	1	YES	NO	4.32058	1.43309
10344	Q09666	AHNK_HUMAN	No	_VKMPK(de)FSMPGFK_	1389	1	YES	NO	3.47486	1.46859
10407	Q12905	ILF2_HUMAN	No	_K(de)IIGQEGDASYIASEISTWDGVIVTPSEK_	328	1	YES	NO	3.72383	1.54981
11070	Q14204	DYHC1_HUMAN	No	_WTDENIDTVAIK(de)HFPNIDREK_	2856	1	YES	NO	4.69795	2.36314
11312	Q14980	NUMA1_HUMAN	No	_AIQQVQEK(de)EVR_	891	1	YES	NO	2.81578	1.36146
11315	Q14980	NUMA1_HUMAN	No	_GRAQADIAIEK(de)AAR_	1024	1	YES	NO	3.07537	1.30409
11355	Q14980	NUMA1_HUMAN	No	_K(de)IITEKDAQIAMMQQR_	242	1	YES	NO	3.50358	1.47639
11403	Q15029	U5S1_HUMAN	No	_IWGDIYFNPK(de)TR_	352	1	YES	NO	3.85685	2.34043
11511	Q15149	PLEC_HUMAN	No	_EGVMVAK(de)K_	28	1	YES	NO	4.79666	1.54963
11662	Q15293	RCN1_HUMAN	No	_ITKEEIIENWNMFVGSQATNYGEDITK(de)NHDEI_	326	1	YES	NO	2.85849	1.43324
12236	Q5T890	ER6L2_HUMAN	No	_IDGSTK(de)SEERIK_	570	1	YES	NO	3.18566	1.30303
12319	Q6NUM9	RETST_HUMAN	No	_AGGAVITK(de)ATVQSVIIDSAGK_	317	1	YES	NO	2.81635	1.98386
12953	Q8TBC4	UBA3_HUMAN	No	_IQEVIDYITNSASIQMK(de)SPAITATIEGK_	398	1	YES	NO	3.09269	1.36491
13317	Q96AC1	FERM2_HUMAN	No	_NK(de)QITAR_	533	1	YES	NO	3.24364	1.30183
13389	Q96CT7	CC124_HUMAN	No	_VATSSK(de)VTR_	94	1	YES	NO	2.95201	1.83668
13669	Q99471	PFD5_HUMAN	No	_VVQTK(de)YVEAK_	42	1	NO	NO	2.62725	1.3312
13869	Q9BQE3	TBA1C_HUMAN	No	_TIQFVDWCPTGFK(de)VGINYQPPTVVPGGDIAK_	352	2	YES	NO	4.197	1.41155
14169	Q9H173	SIL1_HUMAN	No	_IQYEDK(de)FR_	109	1	YES	NO	4.30904	2.80406
14484	Q9NRC6	SPTN5_HUMAN	No	_IK(de)PIIK_	2186;843;191;841	11	YES	NO	3.3434	1.70156
14575	Q9NVD7	PARVA_HUMAN	No	_VIYNIFTK(de)YR_	367	1	YES	NO	3.94281	2.00513
14598	Q9NVP1	DDX18_HUMAN	No	_QKQNK(de)R_	463	1	YES	NO	3.8245	1.65045
14631	Q9NX62	IMPA3_HUMAN	No	_K(de)MFYIIK_	116	1	YES	NO	3.14021	1.46076
14782	Q9NZN4	EHD2_HUMAN	No	_TWMVGTK(de)IPNSVIGR_	480	1	YES	NO	4.23673	2.23406
14873	Q9P2E9	RRBP1_HUMAN	No	_K(de)AEGAPNQGR_	211	1	YES	NO	3.54285	1.32276
14887	Q9P2E9	RRBP1_HUMAN	No	_K(de)VEGAPTQGR_	281	1	YES	NO	3.27687	1.84738
14900	Q9P2J5	SYLC_HUMAN	No	_AGSSK(de)YQWGIMK_	155	1	YES	NO	3.63224	1.47295
15036	Q9UHB6	LIMA1_HUMAN	No	_MMFEKGEPTQTK(de)IIR_	210	1	YES	NO	4.19397	1.71107
15534	Q9Y394	DHRS7_HUMAN	No	_EK(de)DIIVIPIDITDTGSHEAATK_	103	1	YES	NO	3.16807	1.42398
15642	Q9Y490	TLN1_HUMAN	No	_EIVAQGK(de)VGAIPANAIDDGQWSQGIISAAR_	2375	1	YES	NO	2.72378	1.31048
15654	Q9Y490	TLN1_HUMAN	No	_QAAASATQTIAAAQHAASTPK(de)ASAGPQPIIVQSCK_	943	1	YES	NO	4.59197	2.25316
3936	P15056	BRAF_HUMAN	Yes	_SIIHRDIK(de)SNNIFIHEDITVK_	578	1	NO	YES	-3.5177	1.71002
15711	Q9Y4K4	M4K5_HUMAN	Yes	_K(de)FAITTK_	609	1	NO	YES	-2.71729	1.34293
2	A0AVT1	UBA6_HUMAN	No	_IAGK(de)IIPAIATTTATVSGIVAIEMIK_	889	1	NO	YES	-2.69393	1.38025
220	O00154	BACH_HUMAN	No	_FEEGK(de)GR_	362	1	NO	YES	-3.50467	1.76565
606	O15067	PUR4_HUMAN	No	_K(de)EFFIQR_	639	1	NO	YES	-3.64899	1.73974
771	O43181	NDUS4_HUMAN	No	_SYGANFSWNK(de)R_	168	1	NO	YES	-4.40183	1.59718
982	O43813	LANC1_HUMAN	No	_K(de)GYGICHGSAGNAYAFITIYNITQDMK_	317	1	NO	YES	-3.98036	1.91497
990	O43837	IDH3B_HUMAN	No	_RK(de)IDIFANVVHVK_	135	1	NO	YES	-2.90429	1.63967
1041	O60343	TBCD4_HUMAN	No	_IQVAHTK(de)IQAIESNIENIITR_	1226	1	NO	YES	-2.84105	1.43335
1123	O60763	USO1_HUMAN	No	_IVK(de)EIEGVITK_	618	1	NO	YES	-2.84696	1.31996
1337	O75390	CISY_HUMAN	No	_GMK(de)GIVYETSVIDPDEGIR_	76	1	NO	YES	-3.28162	1.38338
1390	O75521	ECI2_HUMAN	No	_K(de)NAINTEMYHEIMR_	161	1	NO	YES	-3.43106	1.35328
1416	O75533	SF3B1_HUMAN	No	_NRPISDEEIDAMFPEGYK(de)VIPPPAGYVPIR_	413	1	NO	YES	-3.35313	1.45514
1676	O95139	NDUB6_HUMAN	No	_MGPMEK(de)FWNK_	45	1	NO	YES	-3.13612	1.4222
1701	O95292	VAPB_HUMAN	No	_VEQVISIEPQHEIK(de)FR_	17	1	NO	YES	-3.72896	1.99603
1771	O95573	ACSL3_HUMAN	No	_AFNFGNGIQMIGQK(de)PK_	157	1	NO	YES	-4.67797	2.62753
1781	O95573	ACSL3_HUMAN	No	_TK(de)ADFFEDENGQR_	547	1	NO	YES	-4.15356	1.92034
2256	P05026	AT1B1_HUMAN	No	_EGKPCIIIK(de)INR_	179	1	NO	YES	-3.71541	1.60601
2537	P07093	GDN_HUMAN	No	_YGVNGVGK(de)IIK_	90	1	NO	YES	-3.21271	1.49759
2668	P07814	SYEP_HUMAN	No	_DNYSPGWK(de)FNHWEIK_	1354	1	NO	YES	-3.09049	1.48248
2737	P07900	HS90A_HUMAN	No	_SITNDWEDHIAVK(de)HFSVEGQIEFR_	327	1	NO	YES	-5.32686	1.7201
2848	P08237	PFKAM_HUMAN	No	_IRPIIK(de)IIAK_	750	1	NO	YES	-3.10683	1.56872
2850	P08237	PFKAM_HUMAN	No	_NFATK(de)MGAK_	678	1	NO	YES	-3.30881	1.66545
2873	P08238	HS90B_HUMAN	No	_SITNDWEDHIAVK(de)HFSVEGQIEFR_	319	1	NO	YES	-5.32686	1.7201
2977	P09104	ENOG_HUMAN	No	_AVEEK(de)ACNCIIIK_	335	1	NO	YES	-4.30802	1.48722
3238	P10606	COX5B_HUMAN	No	_K(de)GIDPYNVIAPK_	57	1	NO	YES	-3.82936	1.43681
3407	P11310	ACADM_HUMAN	No	_VAMGAFDK(de)TRPVVAAGAVGIAQR_	279	1	NO	YES	-4.23078	1.83155
3425	P11387	TOP1_HUMAN	No	_VEHINIHPEIDGQEYVVEFDFIGK(de)DSIR_	532	1	NO	YES	-3.42729	1.40773
3456	P11586	C1TC_HUMAN	No	_CTHWAEGGK(de)GAIAIAQAVQR_	793	1	NO	YES	-3.45137	1.4468
3624	P12956	XRCC6_HUMAN	No	_IGSIVDEFK(de)EIVYPPDYNPEGK_	526	1	NO	YES	-2.75254	1.35553
3647	P13010	XRCC5_HUMAN	No	_SQIPISK(de)IK_	532	1	NO	YES	-5.72143	1.99496
3821	P14324	FPPS_HUMAN	No	_IKEVIEYNAIGGK(de)YNR_	123	1	NO	YES	-4.3656	1.93316
4073	P16403	H12_HUMAN	No	_SAAK(de)AVKPK_	191	1	NO	YES	-5.45061	1.86828
4111	P16949	STMN1_HUMAN	No	_MAEEK(de)ITHK_	100	2	NO	YES	-3.09409	1.3399
4348	P18754	RCC1_HUMAN	No	_VVISVSSGGQHTVIIVK(de)DKEQS_	416	1	NO	YES	-3.45968	1.45368
4465	P20340	RAB6A_HUMAN	No	_AK(de)EINVMFIETSAK_	146	1	NO	YES	-2.83662	1.35214
4652	P21912	SDHB_HUMAN	No	_IAK(de)IQDPFSIYR_	233	1	NO	YES	-3.00222	1.32387
4857	P23381	SYWC_HUMAN	No	_IGYPKPAIIHSTFFPAIQGAQTK(de)M(ox)SASDPNSSIFITDTAK_	349	1	NO	YES	-5.65271	1.71897
4982	P25205	MCM3_HUMAN	No	_K(de)GGYTSGTFR_	248	1	NO	YES	-2.8704	1.59948
5157	P26640	SYVC_HUMAN	No	_IETMIGDVAVAVHPK(de)DTR_	552	1	NO	YES	-4.64608	2.03228
5375	P29401	TKT_HUMAN	No	_QAFTDVATGSIGQGIGAACGMAYTGK(de)YFDKASYR_	140	1	NO	YES	-4.11222	1.85853
5649	P31939	PUR9_HUMAN	No	_IAGDK(de)ANYWWIR_	461	1	NO	YES	-3.1832	1.44771
5754	P33176	KINH_HUMAN	No	_VHK(de)QIVR_	847	3	NO	YES	-2.72234	1.39406
5839	P34932	HSP74_HUMAN	No	_QVYVDKIAEIK(de)NIGQPIK_	679	1	NO	YES	-3.95685	1.33655
6023	P35580	MYH10_HUMAN	No	_AAANK(de)IVR_	1842	1	NO	YES	-4.91252	2.34404
6031	P35580	MYH10_HUMAN	No	_AMVNKDDIQK(de)MNPPK_	78	1	NO	YES	-4.11757	2.3612
6037	P35580	MYH10_HUMAN	No	_K(de)IVWIPSER_	34	1	NO	YES	-3.53706	1.71621
6044	P35580	MYH10_HUMAN	No	_EVSTIK(de)NR_	1925	1	NO	YES	-3.96578	2.08993
6048	P35580	MYH10_HUMAN	No	_NNAIK(de)VVR_	1111	1	NO	YES	-3.45783	2.31987
6050	P35580	MYH10_HUMAN	No	_HATAIEEISEQIEQAK(de)R_	1216	1	NO	YES	-3.15824	1.56095
6054	P35580	MYH10_HUMAN	No	_IGQSK(de)IFFR_	767;767	2	NO	YES	-4.57087	2.22511
6055	P35580	MYH10_HUMAN	No	_IIIK(de)QVR_	1596	1	NO	YES	-4.5498	1.66853
6056	P35580	MYH10_HUMAN	No	_IIK(de)DAEAISQRIEEK_	1399	1	NO	YES	-4.0172	1.97864
6069	P35580	MYH10_HUMAN	No	_K(de)IDGETTDIQDQIAEIQAQIDEIKIQIAK_	1059	1	NO	YES	-3.58901	1.4303
6073	P35580	MYH10_HUMAN	No	_K(de)MQAHIQDIEEQIDEEEGAR_	947	1	NO	YES	-3.52301	1.45045
6076	P35580	MYH10_HUMAN	No	_K(de)TTIQVDTINAEIAAER_	1761	1	NO	YES	-3.26249	1.31175
6089	P35580	MYH10_HUMAN	No	_SAAQK(de)SDNAR_	1782	1	NO	YES	-5.54217	3.5065
6092	P35580	MYH10_HUMAN	No	_VFTK(de)VKPIIQVTR_	840	1	NO	YES	-3.69165	1.65681
6138	P35749	MYH11_HUMAN	No	_AQTK(de)EQADFAVEAIAK_	414	1	NO	YES	-4.26257	2.02616
6257	P37235	HPCL1_HUMAN	No	_GAK(de)SDPSIVR_	174	3	NO	YES	-3.68768	1.80469
6466	P40925	MDHC_HUMAN	No	_AQIAIK(de)IGVTANDVK_	170	1	NO	YES	-3.12831	1.34524
6648	P42704	LPPRC_HUMAN	No	_CVANNQVETIEK(de)IVEITQK_	941	1	NO	YES	-2.93312	1.45381
6672	P42704	LPPRC_HUMAN	No	_K(de)VIEEQIEPAVEK_	1224	1	NO	YES	-3.20786	1.61932
6742	P43304	GPDM_HUMAN	No	_K(de)FIYYEMGYK_	597	1	NO	YES	-3.22944	1.38068
6743	P43304	GPDM_HUMAN	No	_MVK(de)EAIHER_	138	1	NO	YES	-2.97135	3.12756
7042	P47895	AL1A3_HUMAN	No	_IAFTGSTEVGK(de)IVK_	263	1	NO	YES	-3.75196	1.35989
7055	P47895	AL1A3_HUMAN	No	_YFAGWADKIQGK(de)TIPTDDNVVCFTR_	154	1	NO	YES	-3.69664	1.36844
7246	P49327	FAS_HUMAN	No	_FDASFFGVHPK(de)QAHTMDPQIR_	70	1	NO	YES	-5.72848	2.73802
7374	P49736	MCM2_HUMAN	No	_YIIYAK(de)ER_	728	1	NO	YES	-3.83327	1.9309
7453	P50395	GDIB_HUMAN	No	_FK(de)IPGSPPESMGR_	57	1	NO	YES	-3.94055	1.39474
7652	P51606	RENBP_HUMAN	No	_DGRPVK(de)VQR_	126	1	NO	YES	-2.72637	1.50379
8169	P55327	TPD52_HUMAN	No	_QNIAK(de)GWQDVTATSAYKK_	125	1	NO	YES	-3.66834	1.72516
8180	P55786	PSA_HUMAN	No	_GIVIGK(de)IGK_	712	1	NO	YES	-2.71698	1.34247
8239	P56556	NDUA6_HUMAN	No	_QATSTASTFVK(de)PIFSR_	44	1	NO	YES	-3.09787	1.44771
8241	P56693	SOX10_HUMAN	No	_KDHPDYK(de)YQPR_	172	3	NO	YES	-2.91782	1.79826
8243	P56693	SOX10_HUMAN	No	_IINESDK(de)RPFIEEAER_	150	1	NO	YES	-4.55173	1.97551
8251	P57729	RAB38_HUMAN	No	_IIVIGDIGVGK(de)TSIIKR_	22	1	NO	YES	-2.70182	1.37893
8261	P58546	MTPN_HUMAN	No	_NGDIDEVK(de)DYVAKGEDVNR_	19	1	NO	YES	-3.9638	1.68781
8388	P61088	UBE2N_HUMAN	No	_IYHPNVDK(de)IGR_	82	1	NO	YES	-3.59337	1.54961
8411	P61160	ARP2_HUMAN	No	_EK(de)ICYVGYNIEQEQK_	219	1	NO	YES	-4.20375	2.29575
8539	P61916	NPC2_HUMAN	No	_TYSYINKIPVK(de)SEYPSIK_	116	1	NO	YES	-3.14958	1.53716
9192	P78417	GSTO1_HUMAN	No	_EFTK(de)IEEVITNKK_	152	1	NO	YES	-3.15797	1.34095
9337	P83731	RL24_HUMAN	No	_KAK(de)QASK_	119	1	NO	YES	-3.7241	1.37892
9566	Q00796	DHSO_HUMAN	No	_(ac)AAAAK(de)PNNISIVVHGPGDIR_	6	1	NO	YES	-4.10527	1.88095
9567	Q00796	DHSO_HUMAN	No	_GIGIK(de)IMIK_	345	1	NO	YES	-3.41104	2.09224
9588	Q00839	HNRPU_HUMAN	No	_K(de)AIPPEKK_	675	1	NO	YES	-3.03963	1.86103
9672	Q01130	SRSF2_HUMAN	No	_SK(de)SSSVSR_	172	2	NO	YES	-4.41606	2.20279
9793	Q02790	FKBP4_HUMAN	No	_IASHINIAMCHIK(de)IQAFSAAIESCNK_	331	1	NO	YES	-3.2816	1.55097
9818	Q02878	RL6_HUMAN	No	_HQEGEIFDTEKEK(de)YEITEQR_	239	1	NO	YES	-4.67693	1.39697
9845	Q02952	AKA12_HUMAN	No	_VFK(de)FVGFK_	177	1	NO	YES	-5.05026	2.92785
9852	Q02952	AKA12_HUMAN	No	_SSK(de)IVQNIIQTAVDQFVR_	1548	1	NO	YES	-5.52833	4.76148
9975	Q05707	COEA1_HUMAN	No	_AIK(de)YVR_	1117	1	NO	YES	-3.30215	1.4083
10015	Q07021	C1QBP_HUMAN	No	_VEEQEPEITSTPNFVVEVIK(de)NDDGKK_	174	1	NO	YES	-4.65378	1.81551
10071	Q08211	DHX9_HUMAN	No	_IQGEYK(de)YTQVGPDHNR_	199	1	NO	YES	-3.57316	1.40672
10409	Q12905	ILF2_HUMAN	No	_WFEENASQSTVK(de)VIIR_	221	1	NO	YES	-5.16984	2.56101
10505	Q13148	TADBP_HUMAN	No	_FTEYETQVK(de)VMSQR_	160	1	NO	YES	-3.34912	1.97541
10861	Q13813	SPTN1_HUMAN	No	_ITK(de)EAGSVSIR_	1057	1	NO	YES	-3.13196	1.74433
10863	Q13813	SPTN1_HUMAN	No	_KVEDIFITFAKK(de)_	2099	1	NO	YES	-3.53963	1.44035
10935	Q14103	HNRPD_HUMAN	No	_EEWK(de)MFIGGISWDTTKK_	98	1	NO	YES	-3.67163	1.67033
11138	Q14376	GALE_HUMAN	No	_DYIHVVDIAK(de)GHIAAIR_	249	1	NO	YES	-3.12931	1.41797
11142	Q14376	GALE_HUMAN	No	_VNITGTIQIIEIMK(de)AHGVK_	120	1	NO	YES	-2.75311	1.54382
11165	Q14566	MCM6_HUMAN	No	_FVDFQK(de)VR_	205	1	NO	YES	-2.98075	1.57026
11198	Q14683	SMC1A_HUMAN	No	_SGEIAQEYDK(de)R_	170	1	NO	YES	-2.71985	1.43088
11278	Q14919	NC2A_HUMAN	No	_K(de)ACQVTQSR_	52	1	NO	YES	-3.05121	1.64857
11439	Q15061	WDR43_HUMAN	No	_NVNIIK(de)K_	491	1	NO	YES	-2.87577	1.49484
11746	Q15459	SF3A1_HUMAN	No	_VEWAK(de)FQER_	251	1	NO	YES	-3.5766	1.40188
11752	Q15599	NHRF2_HUMAN	No	_K(de)GPQGYGFNIHSDK_	156	1	NO	YES	-3.20267	1.50543
11777	Q15691	MARE1_HUMAN	No	_ITVEDIEK(de)ERDFYFGK_	212	1	NO	YES	-2.93439	1.39415
11917	Q16637	SMN_HUMAN	No	_HAIK(de)NGDICETSGKPK_	55	1	NO	YES	-3.29939	1.38778
11960	Q16666	IF16_HUMAN	No	_SEDTISK(de)MNDFMR_	451	1	NO	YES	-4.25771	2.03703
12031	Q16851	UGPA_HUMAN	No	_GPSVDWGK(de)IQRPPEDSIQPYEK_	77	1	NO	YES	-4.13287	1.49432
12130	Q4VC31	CCD58_HUMAN	No	_IVHEINTTVPTASFAGK(de)IDASQTCK_	46	1	NO	YES	-4.33377	1.99426
12155	Q53H12	AGK_HUMAN	No	_K(de)IQFFCDPR_	403	1	NO	YES	-3.57068	1.31427
12188	Q5JTH9	RRP12_HUMAN	No	_SDITVDAVK(de)IHNEIQSGSIR_	57	1	NO	YES	-4.04692	1.39403
12259	Q5VW32	BROX_HUMAN	No	_IYAK(de)AEAICK_	283	1	NO	YES	-3.8563	1.58576
12364	Q6P2Q9	PRP8_HUMAN	No	_GATVDK(de)TVCKK_	769	1	NO	YES	-2.89397	1.44557
12379	Q6P2Q9	PRP8_HUMAN	No	_K(de)YVNGSTYQR_	218	1	NO	YES	-3.12984	2.14653
12430	Q6UVK1	CSPG4_HUMAN	No	_VSDGIQASPPATIK(de)VVAIRPAIQIHR_	655	1	NO	YES	-3.78031	1.30795
12644	Q86UP2	KTN1_HUMAN	No	_ITDTIVSK(de)QQIEQR_	543	1	NO	YES	-3.83531	1.58463
12690	Q86VP6	CAND1_HUMAN	No	_MIIK(de)IIEDKNGEVQNIAVK_	55	1	NO	YES	-3.87023	1.76967
12832	Q8N766	EMC1_HUMAN	No	_FASIEFSPGSK(de)K_	52	1	NO	YES	-3.32812	1.32629
12877	Q8NBX0	SCPDL_HUMAN	No	_IIDRINK(de)HGIEFSVISSSEV_	416	1	NO	YES	-3.34938	1.32203
13185	Q92841	DDX17_HUMAN	No	_IIQIMEEIMAEK(de)ENK_	417	1	NO	YES	-2.71482	1.3989
13275	Q969G3	SMCE1_HUMAN	No	_K(de)IEAEIIQIEER_	240	1	NO	YES	-3.01896	1.43467
13289	Q969T9	WBP2_HUMAN	No	_K(de)GTVYITPYR_	47	1	NO	YES	-3.90509	1.98185
13293	Q969X5	ERGI1_HUMAN	No	_ITSNPIASHDYIIK(de)IVPTVYEDK_	190	1	NO	YES	-3.53864	1.42173
13421	Q96E39	RMXL1_HUMAN	No	_AIETVFGK(de)YGR_	30	1	NO	YES	-3.03065	1.44132
13433	Q96EP5	DAZP1_HUMAN	No	_K(de)FGVVTEVVMIYDAEK_	135	1	NO	YES	-2.78097	1.45839
13682	Q99497	PARK7_HUMAN	No	_KGIIAAICAGPTAIIAHEIGFGSK(de)VTTHPIAK_	122	1	NO	YES	-4.37637	1.82469
13774	Q99798	ACON_HUMAN	No	_ITGSISGWSSPK(de)DVIIK_	245	1	NO	YES	-2.879	1.54969
13988	Q9BV79	MECR_HUMAN	No	_NFFK(de)DMPQPR_	252	1	NO	YES	-2.85705	1.65539
14015	Q9BWD1	THIC_HUMAN	No	_TGVK(de)IGEMPITDSIICDGITDAFHNCHMGITAENVAKK_	136	1	NO	YES	-4.20107	1.53924
14105	Q9BZZ5	API5_HUMAN	No	_IISGIK(de)SIQTVSGR_	202	1	NO	YES	-3.01753	1.38105
14111	Q9C004	SPY4_HUMAN	No	_IQHPITIIPIDQVK(de)TSHVENDYIDNPSIAITTGPKR_	44	1	NO	YES	-3.57052	1.45045
14112	Q9C004	SPY4_HUMAN	No	_TSHVENDYIDNPSIAITTGPK(de)R_	65	1	NO	YES	-4.29675	1.53196
14158	Q9H0S4	DDX47_HUMAN	No	_NIGFTAIPIHGQMSQSK(de)R_	301	1	NO	YES	-3.55786	1.45986
14209	Q9H3K6	BOLA2_HUMAN	No	_VIVVSAK(de)FEGKPIIQR_	43	1	NO	YES	-3.81792	1.47767
14280	Q9H9B4	SFXN1_HUMAN	No	_AK(de)YIYDSAFHPDTGEK_	72	1	NO	YES	-5.09173	2.02062
14435	Q9NR28	DBLOH_HUMAN	No	_NHIQIVK(de)IQVEEVHQISR_	191	1	NO	YES	-2.98957	1.40455
14522	Q9NSE4	SYIM_HUMAN	No	_SFAK(de)AAIEK_	189	1	NO	YES	-3.77756	1.6066
14673	Q9NYK5	RM39_HUMAN	No	_K(de)SIIAIVDGQPWDMYKPITK_	102	1	NO	YES	-4.54363	1.82624
14832	Q9P258	RCC2_HUMAN	No	_IVK(de)IFDFPGR_	377	1	NO	YES	-3.66838	1.96829
14912	Q9P2J5	SYLC_HUMAN	No	_VIEPYPSK(de)ISGIK_	278	1	NO	YES	-4.00477	1.53505
15027	Q9UGP8	SEC63_HUMAN	No	_IK(de)TIQDIVSIK_	407	1	NO	YES	-3.46208	1.71864
15140	Q9UJU6	DBNL_HUMAN	No	_VGK(de)DSFWAK_	176	1	NO	YES	-2.87379	1.40368
15313	Q9UNZ5	L10K_HUMAN	No	_TAAAASEK(de)NR_	25	1	NO	YES	-3.99422	2.69207
15323	Q9UQ80	PA2G4_HUMAN	No	_VAHSFNCTPIEGMISHQIK(de)QHVIDGEK_	191	1	NO	YES	-4.59039	1.76808
15459	Q9Y2R5	RT17_HUMAN	No	_K(de)TYFAHDAIQQCTVGDIVIIR_	47	1	NO	YES	-4.57273	1.87892
15531	Q9Y383	LC7L2_HUMAN	No	_MDIGECIK(de)VHDIAIR_	61	1	NO	YES	-2.69434	1.31119
15745	Q9Y4W6	AFG32_HUMAN	No	_IIINDAYK(de)R_	710	1	NO	YES	-3.18493	1.47413
15753	Q9Y508	RN114_HUMAN	No	_K(de)NFFISK_	96	1	NO	YES	-2.94951	1.35836
15771	Q9Y5B9	SP16H_HUMAN	No	_GDK(de)VDIIYNNIK_	696	1	NO	YES	-3.23693	1.44197
15806	Q9Y5V0	ZN706_HUMAN	No	_GQQK(de)IQSQQK_	7	1	NO	YES	-2.68293	1.34576
296	Q04771	ACVR1_HUMAN	Yes	_SK(de)NIIVK_	340	5	NO	NO	1.14875	1.12164
331	O00418	EF2K_HUMAN	Yes	_IIQSAK(de)TIIR_	347	1	NO	NO	-1.4021	0.50114
332	O00418	EF2K_HUMAN	Yes	_YIK(de)YNSNSGFVRDDNIR_	238	1	NO	NO	0.898772	0.203578
491	O14757	CHK1_HUMAN	Yes	_ISK(de)GDGIEFKR_	445	1	NO	NO	1.93947	0.363798
516	O14874	BCKD_HUMAN	Yes	_FPFIPM(ox)PIDYIIPEIIK(de)NAM(ox)R_	278	1	NO	NO	1.02986	0.237702
517	O14874	BCKD_HUMAN	Yes	_RICEHK(de)YGNAPR_	245	1	NO	NO	0.302685	0.23348
524	O14920	IKKB_HUMAN	Yes	_DIK(de)PENIVIQQGEQR_	147	1	NO	NO	0.844957	0.20974
527	O14936	CSKP_HUMAN	Yes	_DVK(de)PHCVIIASK_	143	1	NO	NO	0.447344	0.105903
528	O14936	CSKP_HUMAN	Yes	_ETGQQFAVK(de)IVDVAK_	41	1	NO	NO	-0.563782	0.193876
539	O14965	AURKA_HUMAN	Yes	_DIK(de)PENIIIGSAGEIK_	258	1	NO	NO	-1.16151	0.427924
540	O14965	AURKA_HUMAN	Yes	_FIIAIK(de)VIFKAQIEK_	162	1	NO	NO	0.0574252	0.0154443
541	O14965	AURKA_HUMAN	Yes	_GK(de)FGNVYIAR_	143	3	NO	NO	-1.14598	0.258913
573	O15021	MAST4_HUMAN	Yes	_DIK(de)PDNIIVTSMGHIK_	698	1	NO	NO	-0.523824	0.122792
608	O15111	IKKA_HUMAN	Yes	_DIK(de)PENIVIQDVGGK_	146	1	NO	NO	-1.50102	0.325337
722	O15530	PDPK1_HUMAN	Yes	_DIK(de)PENIIINEDMHIQITDFGTAK_	207	1	NO	NO	2.03015	0.784078
723	O15530	PDPK1_HUMAN	Yes	_ENK(de)VPYVTR_	123	2	NO	NO	0.221696	0.0745608
724	O15530	PDPK1_HUMAN	Yes	_EYAIK(de)IIEKR_	111	2	NO	NO	0.216155	0.21994
725	O15530	PDPK1_HUMAN	Yes	_MGPVDK(de)R_	465	1	NO	NO	-1.50236	0.517988
1032	O60285	NUAK1_HUMAN	Yes	_VVAIK(de)SIR_	84	1	NO	NO	2.48531	0.606738
1035	O60307	MAST3_HUMAN	Yes	_DIK(de)PDNIIITSIGHIK_	492	1	NO	NO	2.52942	0.887615
1213	O75116	ROCK2_HUMAN	Yes	_AQFEK(de)QIITER_	1022	1	NO	NO	-0.520947	0.150853
1214	O75116	ROCK2_HUMAN	Yes	_DVK(de)PDNMIIDKHGHIK_	216	1	NO	NO	0.187023	0.0597826
1215	O75116	ROCK2_HUMAN	Yes	_IIIAK(de)VEIEKR_	664	1	NO	NO	0.68972	0.187619
1216	O75116	ROCK2_HUMAN	Yes	_IK(de)DVQEQISR_	997	1	NO	NO	1.36831	0.588109
1217	O75116	ROCK2_HUMAN	Yes	_K(de)FGWVK_	1167	1	NO	NO	0.444667	0.153114
1218	O75116	ROCK2_HUMAN	Yes	_K(de)IHMEIK_	1065	1	NO	NO	0.940155	0.555393
1219	O75116	ROCK2_HUMAN	Yes	_K(de)IIEER_	739;1002	9	NO	NO	-0.872186	0.551912
1220	O75116	ROCK2_HUMAN	Yes	_K(de)YVIVSSK_	1173	1	NO	NO	0.604929	0.236373
1221	O75116	ROCK2_HUMAN	Yes	_MQTQQVNTIK(de)MSEK_	821	1	NO	NO	0.517043	0.159072
1222	O75116	ROCK2_HUMAN	Yes	_NITIK(de)IEQETQKR_	795	1	NO	NO	0.559808	0.159615
1223	O75116	ROCK2_HUMAN	Yes	_NQNSQISTEK(de)VNQIQR_	556	1	NO	NO	0.566803	0.225424
1224	O75116	ROCK2_HUMAN	Yes	_TQAVNK(de)IAEIMNR_	1037;1005	2	NO	NO	1.26252	0.483151
1225	O75116	ROCK2_HUMAN	Yes	_TSMK(de)IQQNQSIR_	1368	1	NO	NO	-0.177219	0.0468753
1226	O75116	ROCK2_HUMAN	Yes	_VYAMK(de)IISK_	121	1	NO	NO	0.225088	0.0468671
1360	O75460	ERN1_HUMAN	Yes	_DIK(de)PHNIIISMPNAHGK_	690	1	NO	NO	2.00825	0.390822
1433	O75582	KS6A5_HUMAN	Yes	_DIK(de)IENIIIDSNGHVVITDFGISK_	179	1	NO	NO	0.335379	0.0550867
1435	O75582	KS6A5_HUMAN	Yes	_VIGTGAYGK(de)VFIVRK_	62;46	2	NO	NO	-1.41012	0.382536
1468	O75676	KS6A4_HUMAN	Yes	_IK(de)IEGIR_	664	1	NO	NO	-0.962788	0.326731
1586	O94804	STK10_HUMAN	Yes	_DIDPNEVWEIVGEIGDGAFGK(de)VYK_	49	1	NO	NO	-0.787146	0.288251
1587	O94804	STK10_HUMAN	Yes	_IIHRDIK(de)AGNVIMTIEGDIR_	159	1	NO	NO	0.473227	0.187133
1588	O94804	STK10_HUMAN	Yes	_NKETGAIAAAK(de)VIETK_	65	1	NO	NO	0.371663	0.0707134
1589	O94804	STK10_HUMAN	Yes	_HQIVK(de)QQIK_	759	1	NO	NO	-1.02329	0.778124
1590	O94804	STK10_HUMAN	Yes	_IIQK(de)EEHR_	574	1	NO	NO	0.226499	0.080141
1591	O94804	STK10_HUMAN	Yes	_K(de)FVVDGVEVSITTSK_	532	1	NO	NO	2.03663	0.759996
1594	O94804	STK10_HUMAN	Yes	_K(de)QIIDRDFVAK_	691	1	NO	NO	-1.31248	0.466663
1596	O94804	STK10_HUMAN	Yes	_MIEQIK(de)VR_	796	1	NO	NO	-1.66383	0.471731
1597	O94804	STK10_HUMAN	Yes	_VIIK(de)IAK_	248;246	2	NO	NO	-0.980006	0.615688
1599	O94806	KPCD3_HUMAN	Yes	_IIK(de)GIFR_	293;292;286	3	NO	NO	-0.403323	0.182573
1650	O94921	CDK14_HUMAN	Yes	_IVAIK(de)VIR_	164	1	NO	NO	1.08931	0.322374
1754	O95382	M3K6_HUMAN	Yes	_IAIK(de)EIPERDSR_	677	3	NO	NO	0.272323	0.0569253
1797	O95747	OXSR1_HUMAN	Yes	_DVK(de)AGNIIIGEDGSVQIADFGVSAFIATGGDITR_	148	1	NO	NO	0.469058	0.0738874
1798	O95747	OXSR1_HUMAN	Yes	_HK(de)FFQK_	289	1	NO	NO	1.85108	0.695859
1801	O95747	OXSR1_HUMAN	Yes	_NK(de)EFIQEK_	297	1	NO	NO	0.953842	0.269007
1802	O95747	OXSR1_HUMAN	Yes	_YGK(de)SFR_	262;308	2	NO	NO	2.14206	1.06862
1841	O95819	M4K4_HUMAN	Yes	_DIK(de)GQNVIITENAEVKIVDFGVSAQIDR_	155;155	3	NO	NO	0.237937	0.135555
1842	O95819	M4K4_HUMAN	Yes	_K(de)FFSFIEGCIVK_	261	1	NO	NO	0.209802	0.0557152
1843	O95819	M4K4_HUMAN	Yes	_K(de)GSVVNVNPTNTRPQSDTPEIR_	898	1	NO	NO	1.05503	0.300547
1844	O95819	M4K4_HUMAN	Yes	_SVETGHIDGVFMHK(de)R_	1198;1319	3	NO	NO	1.28404	0.726821
1852	O95835	LATS1_HUMAN	Yes	_AIYATK(de)TIR_	734	1	NO	NO	-1.37962	0.267431
1853	O95835	LATS1_HUMAN	Yes	_DIK(de)PDNIIIDRDGHIK_	830	2	NO	NO	0.475334	0.0798803
1873	O96017	CHK2_HUMAN	Yes	_VAIK(de)IISK_	249	1	NO	NO	-0.0633705	0.0662257
1945	P42684	ABL2_HUMAN	Yes	_IMTGDTYTAHAGAK(de)FPIK_	446	2	NO	NO	0.73194	0.169814
1946	P00533	EGFR_HUMAN	Yes	_EYHAEGGK(de)VPIKWM(ox)AIESIIHR_	875	1	NO	NO	0.898166	0.241962
1948	P00533	EGFR_HUMAN	Yes	_VIGSGAFGTVYK(de)GIWIPEGEKVK_	728	1	NO	NO	-2.10878	0.751239
1949	P00533	EGFR_HUMAN	Yes	_VKIPVAIK(de)EIR_	745	1	NO	NO	1.36539	0.326195
2380	P06241	FYN_HUMAN	Yes	_QGAK(de)FPIKWTAPEAAIYGR_	427	3	NO	NO	0.499864	0.383691
2381	P06241	FYN_HUMAN	Yes	_VAIK(de)TIKPGTMSPESFIEEAQIMK_	299	1	NO	NO	2.23647	0.611477
2399	P06493	CDK1_HUMAN	Yes	_DIK(de)PQNIIIDDKGTIK_	130	1	NO	NO	2.6829	0.723706
2400	P06493	CDK1_HUMAN	Yes	_EISIIK(de)EIR_	56	1	NO	NO	-1.283	0.713539
2401	P06493	CDK1_HUMAN	Yes	_K(de)IRIESEEEGVPSTAIR_	34	1	NO	NO	1.32945	0.375125
2402	P06493	CDK1_HUMAN	Yes	_K(de)PIFHGDSEIDQIFR_	201	1	NO	NO	-0.583993	0.13958
2403	P06493	CDK1_HUMAN	Yes	_NIDENGIDIISK(de)MIIYDPAKR_	266	1	NO	NO	-1.42326	0.707714
2773	P07948	LYN_HUMAN	Yes	_VAVK(de)TIKPGTMSVQAFIEEANIMK_	275	1	NO	NO	1.89176	0.387832
4009	P15735	PHKG2_HUMAN	Yes	_ATGHEFAVK(de)IMEVTAERISPEQIEEVR_	53	1	NO	NO	0.0153603	0.00585274
4010	P15735	PHKG2_HUMAN	Yes	_K(de)GEQQNR_	364	1	NO	NO	0.206387	0.0305289
4082	P16591	FER_HUMAN	Yes	_TSVAVK(de)TCKEDIPQEIK_	591	1	NO	NO	0.622845	0.140486
4083	P16591	FER_HUMAN	Yes	_QEDGGVYSSSGIK(de)QIPIKWTAPEAINYGR_	720	1	NO	NO	2.2372	0.661699
4158	P17612	KAPCA_HUMAN	Yes	_AK(de)EDFIK_	24	2	NO	NO	-0.236336	0.0523406
4160	P17612	KAPCA_HUMAN	Yes	_K(de)WESPAQNTAHIDQFER_	30	1	NO	NO	-2.19288	1.12336
4161	P17612	KAPCA_HUMAN	Yes	_NIIQVDITK(de)R_	280	2	NO	NO	-1.60826	0.760714
4162	P17612	KAPCA_HUMAN	Yes	_VMIVK(de)HK_	62	2	NO	NO	-0.318724	0.0824735
4163	P17612	KAPCA_HUMAN	Yes	_VRFPSHFSSDIK(de)DIIR_	267	2	NO	NO	-1.45699	0.486161
4425	P19525	E2AK2_HUMAN	Yes	_DIK(de)PSNIFIVDTK_	416	1	NO	NO	1.20658	0.630441
4428	P19525	E2AK2_HUMAN	Yes	_IGDFGIVTSIK(de)NDGKR_	440	1	NO	NO	0.913161	0.571153
4429	P19525	E2AK2_HUMAN	Yes	_MGQK(de)EYSIGTGSTK_	140	1	NO	NO	-0.0867253	0.0219096
4431	P19525	E2AK2_HUMAN	Yes	_TIIQK(de)IISK_	517	1	NO	NO	0.453331	0.748264
4433	P19525	E2AK2_HUMAN	Yes	_TYVIK(de)R_	296	1	NO	NO	0.810485	0.778512
4438	P19784	CSK22_HUMAN	Yes	_DVK(de)PHNVMIDHQQKK_	159	1	NO	NO	1.02496	0.849407
4439	P19784	CSK22_HUMAN	Yes	_GK(de)YSEVFEAINITNNER_	50	1	NO	NO	1.37773	0.481509
4468	P20594	ANPRB_HUMAN	Yes	_GMAFIHNSIISSHGSIK(de)SSNCVVDSR_	646	1	NO	NO	1.07561	0.186806
4521	P21127	CD11B_HUMAN	Yes	_DIK(de)TSNIIISHAGIIK_	564	2	NO	NO	0.121637	0.0686099
4883	P23443	KS6B1_HUMAN	Yes	_DIK(de)PENIMINHQGHVK_	220	1	NO	NO	0.213617	0.105729
4973	P24941	CDK2_HUMAN	Yes	_VIHRDIK(de)PQNIIINTEGAIK_	129	1	NO	NO	-1.36607	1.02515
4975	P24941	CDK2_HUMAN	Yes	_NKITGEVVAIKK(de)_	34	1	NO	NO	-1.53189	0.334693
4977	P24941	CDK2_HUMAN	Yes	_VEK(de)IGEGTYGVVYK_	9	2	NO	NO	-1.56826	0.759487
5203	P27448	MARK3_HUMAN	Yes	_DIK(de)AENIIIDADMNIK_	180;177	2	NO	NO	1.49348	0.564619
5204	P27448	MARK3_HUMAN	Yes	_EVAIK(de)IIDKTQINPTSIQK_	85	1	NO	NO	3.68893	1.18422
5205	P27448	MARK3_HUMAN	Yes	_TIGK(de)GNFAK_	64;61;67;68	4	NO	NO	1.73203	0.665149
5336	P28482	MK01_HUMAN	Yes	_YIHSANVIHRDIK(de)PSNIIINTTCDIK_	151	2	NO	NO	-0.671061	2.28392
5337	P28482	MK01_HUMAN	Yes	_EIK(de)IIIR_	73	1	NO	NO	-2.52972	1.03581
5338	P28482	MK01_HUMAN	Yes	_IFPNADSK(de)AIDIIDK_	285	1	NO	NO	-0.445027	0.110433
5355	P29317	EPHA2_HUMAN	Yes	_GIAAGMK(de)YIANMNYVHR_	728	1	NO	NO	-2.25353	0.996827
5356	P29317	EPHA2_HUMAN	Yes	_K(de)EVPVAIK_	639	1	NO	NO	-0.0599124	0.0144951
5358	P29317	EPHA2_HUMAN	Yes	_QK(de)VIGAGEFGEVYK_	617	1	NO	NO	1.90832	0.655513
5360	P29317	EPHA2_HUMAN	Yes	_QSPEDVYFSK(de)SEQIKPIK_	578	1	NO	NO	-0.161525	0.0322475
5362	P29317	EPHA2_HUMAN	Yes	_VIEDDPEATYTTSGGK(de)IPIR_	778	1	NO	NO	2.38937	0.420982
5363	P29317	EPHA2_HUMAN	Yes	_VWK(de)YEVTYR_	468	1	NO	NO	-0.525219	0.077756
5364	P29320	EPHA3_HUMAN	Yes	_GGK(de)IPIR_	785	3	NO	NO	1.31569	0.307368
5544	P30530	UFO_HUMAN	Yes	_IAK(de)MPVK_	710	2	NO	NO	1.1804	0.296148
5622	P31749	AKT1_HUMAN	Yes	_IIGK(de)GTFGK_	158;160	3	NO	NO	-1.10268	0.567444
6093	P35590	TIE1_HUMAN	Yes	_IITK(de)QSR_	458	1	NO	NO	1.06162	0.479567
6161	P36507	MP2K2_HUMAN	Yes	_DVK(de)PSNIIVNSRGEIK_	196	1	NO	NO	0.265913	0.170036
6162	P36507	MP2K2_HUMAN	Yes	_GEIK(de)ICDFGVSGQIIDSMANSFVGTR_	209;205	2	NO	NO	1.70417	1.08826
6163	P36507	MP2K2_HUMAN	Yes	_ISEIGAGNGGVVTK(de)VQHRPSGIIMAR_	88	1	NO	NO	1.43001	0.419441
6164	P36507	MP2K2_HUMAN	Yes	_K(de)IIHIEIKPAIR_	101;97	2	NO	NO	0.479055	0.445203
6550	P41240	CSK_HUMAN	Yes	_IPIK(de)DVVPR_	393	1	NO	NO	0.231498	0.0837187
6551	P41240	CSK_HUMAN	Yes	_VAVK(de)CIKNDATAQAFIAEASVMTQIR_	222	1	NO	NO	0.510891	0.125991
6552	P41240	CSK_HUMAN	Yes	_VSDFGITK(de)EASSTQDTGKIPVK_	337	1	NO	NO	0.0923699	0.0990493
6596	P41743	KPCI_HUMAN	Yes	_DIK(de)IDNVIIDSEGHIK_	380	1	NO	NO	0.500881	0.137407
6597	P41743	KPCI_HUMAN	Yes	_IYAMK(de)VVK_	283	2	NO	NO	0.310549	0.453638
6824	P53779	MK10_HUMAN	Yes	_DIK(de)PSNIVVK_	191	3	NO	NO	0.482219	0.148748
6825	P45985	MP2K4_HUMAN	Yes	_IIHRDIK(de)PSNIIIDR_	231	1	NO	NO	0.820425	0.332528
6826	P45985	MP2K4_HUMAN	Yes	_ICDFGISGQIVDSIAK(de)TR_	260	1	NO	NO	0.664048	0.18622
6827	P45985	MP2K4_HUMAN	Yes	_M(ox)VHKPSGQIMAVK(de)R_	131	1	NO	NO	-0.321185	0.0530755
6885	P46734	MP2K3_HUMAN	Yes	_ISVIHRDVK(de)PSNVIINK_	192	1	NO	NO	-0.803947	0.164824
6886	P46734	MP2K3_HUMAN	Yes	_HAQSGTIM(ox)AVK(de)R_	93	1	NO	NO	1.61134	0.451078
6887	P46734	MP2K3_HUMAN	Yes	_MCDFGISGYIVDSVAK(de)TMDAGCKPYMAPER_	221	1	NO	NO	0.707478	0.146866
6888	P46734	MP2K3_HUMAN	Yes	_TMDAGCK(de)PYMAPER_	228	1	NO	NO	0.548494	0.13066
7178	P48729	KC1A_HUMAN	Yes	_DIK(de)PDNFIM(ox)GIGR_	138	1	NO	NO	-0.237553	0.185482
7179	P49674	KC1E_HUMAN	Yes	_DVK(de)PDNFIMGIGKK_	130	2	NO	NO	-1.72113	0.827793
7268	P49336	CDK8_HUMAN	Yes	_DIK(de)PANIIVM(ox)GEGPER_	153	2	NO	NO	-2.78935	0.832024
7423	P49840	GSK3A_HUMAN	Yes	_DIK(de)PQNIIVDPDTAVIK_	246	1	NO	NO	-0.100745	0.0767744
7424	P49841	GSK3B_HUMAN	Yes	_DIK(de)PQNIIIDPDTAVIK_	183	1	NO	NO	-0.438056	0.649413
7517	P50613	CDK7_HUMAN	Yes	_DIK(de)PNNIIIDENGVIK_	139	1	NO	NO	-1.94666	0.49053
7518	P50613	CDK7_HUMAN	Yes	_DKNTNQIVAIK(de)K_	41	1	NO	NO	0.49294	0.199631
7519	P50613	CDK7_HUMAN	Yes	_EQSNPAIAIK(de)R_	328	1	NO	NO	-0.501686	0.381975
7521	P50750	CDK9_HUMAN	Yes	_DMK(de)AANVIITR_	151	1	NO	NO	0.29239	0.0844907
7522	P50750	CDK9_HUMAN	Yes	_IGQGTFGEVFK(de)AR_	35	1	NO	NO	-1.00216	0.309253
7523	P50750	CDK9_HUMAN	Yes	_K(de)GSQITQQSTNQSR_	345	1	NO	NO	-0.10286	0.0249881
7524	P50750	CDK9_HUMAN	Yes	_QYDSVECPFCDEVSKYEK(de)IAK_	21	1	NO	NO	3.21151	1.03467
7687	P51812	KS6A3_HUMAN	Yes	_DIK(de)PENIIIDEEGHIKITDFGISK_	195;186;189	3	NO	NO	-0.450081	0.221173
7688	P51812	KS6A3_HUMAN	Yes	_ITDFGISK(de)ESIDHEKK_	216	1	NO	NO	0.0878744	0.0352865
7689	P51812	KS6A3_HUMAN	Yes	_DIK(de)PSNIIYVDESGNPESIR_	541	1	NO	NO	0.631338	0.13477
7690	P51812	KS6A3_HUMAN	Yes	_QIYAMK(de)VIK_	100	1	NO	NO	-2.26712	0.697632
7691	P51812	KS6A3_HUMAN	Yes	_VIGQGSFGK(de)VFIVKK_	81	1	NO	NO	0.625071	0.151945
7702	P51956	NEK3_HUMAN	Yes	_SK(de)NIFITQNGK_	131	1	NO	NO	-1.04251	0.317491
7703	P51957	NEK4_HUMAN	Yes	_DIK(de)TQNVFITR_	133	1	NO	NO	-0.97449	0.233378
7758	P52564	MP2K6_HUMAN	Yes	_ISVIHRDVK(de)PSNVIINAIGQVK_	181	1	NO	NO	0.7678	0.37282
7759	P52564	MP2K6_HUMAN	Yes	_HVPSGQIM(ox)AVK(de)R_	82	1	NO	NO	0.403618	0.081505
7760	P52564	MP2K6_HUMAN	Yes	_M(ox)CDFGISGYIVDSVAK(de)TIDAGCKPYMAPER_	210	1	NO	NO	-0.192168	0.0349466
7761	P52564	MP2K6_HUMAN	Yes	_TIDAGCK(de)PYMAPER_	217	1	NO	NO	-0.126138	0.0253332
7846	P53350	PLK1_HUMAN	Yes	_EVFAGK(de)IVPK_	82	1	NO	NO	-1.13191	0.685415
7847	P53350	PLK1_HUMAN	Yes	_DIK(de)IGNIFINEDIEVK_	178	1	NO	NO	-0.388359	0.0828356
9104	P68400	CSK21_HUMAN	Yes	_DVK(de)PHNVMIDHEHRK_	158	2	NO	NO	0.428858	0.381974
9105	P68400	CSK21_HUMAN	Yes	_EAMEHPYFYTVVK(de)DQAR_	329	2	NO	NO	0.190036	0.0394001
9106	P68400	CSK21_HUMAN	Yes	_EIK(de)IIENIR_	83	2	NO	NO	-0.529984	0.102855
9107	P68400	CSK21_HUMAN	Yes	_FVHSENQHIVSPEAIDFIDK(de)IIR_	303	2	NO	NO	-1.90889	0.643586
9108	P68400	CSK21_HUMAN	Yes	_GGPNIITIADIVK(de)DPVSR_	102	2	NO	NO	1.57071	0.553296
9109	P68400	CSK21_HUMAN	Yes	_GK(de)YSEVFEAINITNNEK_	49	2	NO	NO	-2.04655	0.687066
9110	P68400	CSK21_HUMAN	Yes	_IAK(de)VIGTEDIYDYIDKYNIEIDPR_	247	1	NO	NO	1.20099	0.513641
9111	P68400	CSK21_HUMAN	Yes	_TPAIVFEHVNNTDFK(de)QIYQTITDYDIR_	122	2	NO	NO	0.404613	0.0843684
9164	P78362	SRPK2_HUMAN	Yes	_FVAMK(de)VVK_	110	1	NO	NO	0.110082	0.124327
9165	P78362	SRPK2_HUMAN	Yes	_VVK(de)SAQHYTETAIDEIK_	113	1	NO	NO	-1.37264	0.385091
9166	P78362	SRPK2_HUMAN	Yes	_IIHTDIK(de)PENIIMCVDDAYVR_	216	1	NO	NO	-0.121113	0.230321
9199	P78527	PRKDC_HUMAN	Yes	_KAAISAIESFIK(de)QVSNMVAK_	321	1	NO	NO	-0.253821	0.0756324
9200	P78527	PRKDC_HUMAN	Yes	_AAQK(de)GFNK_	824	1	NO	NO	1.26703	0.746124
9201	P78527	PRKDC_HUMAN	Yes	_GFNK(de)VVIK_	828	1	NO	NO	1.30246	0.264635
9202	P78527	PRKDC_HUMAN	Yes	_AEIAK(de)TPVNKK_	3598	1	NO	NO	0.474	0.170643
9205	P78527	PRKDC_HUMAN	Yes	_MSPYK(de)DIIETHIR_	1412	1	NO	NO	1.25653	0.625105
9206	P78527	PRKDC_HUMAN	Yes	_AIVK(de)VFIAIAAK_	463	1	NO	NO	0.865399	0.610604
9207	P78527	PRKDC_HUMAN	Yes	_VFIAIAAK(de)GPVIR_	471	1	NO	NO	0.692475	0.230633
9208	P78527	PRKDC_HUMAN	Yes	_APIK(de)SVGPDFGK_	2694	1	NO	NO	-2.37523	0.698632
9209	P78527	PRKDC_HUMAN	Yes	_SVGPDFGK(de)K_	2702	1	NO	NO	-0.0767768	0.0150149
9212	P78527	PRKDC_HUMAN	Yes	_CFFISK(de)IEEK_	3192	1	NO	NO	-2.80878	0.892587
9214	P78527	PRKDC_HUMAN	Yes	_CK(de)QMFITQTDTGDDR_	393	1	NO	NO	-0.0165016	0.00392743
9215	P78527	PRKDC_HUMAN	Yes	_DIPSWMK(de)FIHGK_	2127	1	NO	NO	-0.233416	0.339236
9216	P78527	PRKDC_HUMAN	Yes	_FIHGK(de)IGNPIVPINIR_	2132	1	NO	NO	-0.385278	0.0909814
9217	P78527	PRKDC_HUMAN	Yes	_DQEK(de)ISIMYAR_	2738	1	NO	NO	-1.57635	0.428215
9218	P78527	PRKDC_HUMAN	Yes	_DTSTGHK(de)NK_	3550	1	NO	NO	0.171615	0.0564335
9219	P78527	PRKDC_HUMAN	Yes	_NK(de)EFVAR_	3552	1	NO	NO	-0.391053	0.972682
9220	P78527	PRKDC_HUMAN	Yes	_EFIK(de)WSIK_	1038	1	NO	NO	-0.802802	0.429995
9221	P78527	PRKDC_HUMAN	Yes	_WSIK(de)QITPQQQEK_	1042	1	NO	NO	0.0784799	0.210835
9222	P78527	PRKDC_HUMAN	Yes	_GHDEREHPFIVK(de)GGEDIR_	3753	1	NO	NO	0.0451092	0.0111486
9223	P78527	PRKDC_HUMAN	Yes	_EIFNFVIK(de)AIRPQIDIK_	254	1	NO	NO	0.0112224	0.0117575
9224	P78527	PRKDC_HUMAN	Yes	_EK(de)ITAQSIEEICAVNIYGPDAQVDR_	1422	1	NO	NO	1.13	0.350589
9225	P78527	PRKDC_HUMAN	Yes	_EMK(de)PVIFIDVFIPR_	902	1	NO	NO	-2.1083	1.16391
9226	P78527	PRKDC_HUMAN	Yes	_IPVIAGCIK(de)GISSIICNFTK_	225	1	NO	NO	0.531437	0.221105
9227	P78527	PRKDC_HUMAN	Yes	_ESK(de)INQVFHGSCITEGNEITK_	1895	1	NO	NO	-0.400674	0.166746
9229	P78527	PRKDC_HUMAN	Yes	_VPADIIK(de)R_	3884	1	NO	NO	0.458136	1.00125
9230	P78527	PRKDC_HUMAN	Yes	_FIVCINK(de)VTK_	2366	1	NO	NO	0.228429	0.051003
9231	P78527	PRKDC_HUMAN	Yes	_MK(de)MIDSAR_	3241	1	NO	NO	0.464162	0.0836835
9233	P78527	PRKDC_HUMAN	Yes	_VVIK(de)HIK_	832	1	NO	NO	0.419043	1.69385
9234	P78527	PRKDC_HUMAN	Yes	_GIFTSEIGTK(de)QITQSAIIAEAR_	2950	1	NO	NO	0.151748	0.0340961
9235	P78527	PRKDC_HUMAN	Yes	_GK(de)PIPEYHVR_	3710	1	NO	NO	-0.745267	0.273811
9237	P78527	PRKDC_HUMAN	Yes	_HGDIPDIQIK(de)HSSIITPIQAVAQRDPIIAK_	2786	1	NO	NO	-0.647125	0.141073
9238	P78527	PRKDC_HUMAN	Yes	_HSSIITPIQAVAQRDPIIAK(de)QIFSSIFSGIIK_	2806	1	NO	NO	-0.670375	0.21512
9239	P78527	PRKDC_HUMAN	Yes	_HK(de)SIEIFYK_	1186	1	NO	NO	0.537916	1.75139
9240	P78527	PRKDC_HUMAN	Yes	_SIEIFYK(de)FVPIIPGNR_	1193	1	NO	NO	0.382389	0.38741
9241	P78527	PRKDC_HUMAN	Yes	_HQGIK(de)IATTIIQHWK_	1617	1	NO	NO	-1.0158	0.299043
9242	P78527	PRKDC_HUMAN	Yes	_IAAVVSACK(de)QIHR_	1456	1	NO	NO	0.615992	0.415818
9243	P78527	PRKDC_HUMAN	Yes	_IAK(de)DVIIQGIIDENPGIQIIIR_	2503	1	NO	NO	-0.450588	0.170642
9245	P78527	PRKDC_HUMAN	Yes	_ICSKPVVIPK(de)GPESESEDHR_	499	1	NO	NO	1.86482	1.09611
9246	P78527	PRKDC_HUMAN	Yes	_ICYAK(de)R_	4048	1	NO	NO	-0.257483	0.0551208
9247	P78527	PRKDC_HUMAN	Yes	_IFIAK(de)IVINTEEVFRPYAK_	2148	1	NO	NO	-0.755816	0.203897
9248	P78527	PRKDC_HUMAN	Yes	_IGIPGDEVDNKVK(de)GAAGR_	2717	1	NO	NO	-1.93394	0.647934
9250	P78527	PRKDC_HUMAN	Yes	_IINTWTNRYPDAK(de)MDPMNIWDDIITNR_	3172	1	NO	NO	-1.49323	0.756215
9251	P78527	PRKDC_HUMAN	Yes	_IIPAEIPAK(de)R_	2908	1	NO	NO	0.260767	1.1451
9252	P78527	PRKDC_HUMAN	Yes	_IK(de)IIIQGEADQSIITFIDKAMHGEIQK_	3050	1	NO	NO	1.1246	0.479397
9254	P78527	PRKDC_HUMAN	Yes	_IMDEFK(de)IGEIFSK_	148	1	NO	NO	-0.203539	0.0437979
9255	P78527	PRKDC_HUMAN	Yes	_IMEFTTTIINTSPEGWK(de)IIKK_	1357	1	NO	NO	-1.58819	0.528068
9256	P78527	PRKDC_HUMAN	Yes	_K(de)DICNTHIMR_	1361	1	NO	NO	0.216983	0.588207
9258	P78527	PRKDC_HUMAN	Yes	_K(de)MGYYK_	1870	1	NO	NO	-0.27739	0.280593
9259	P78527	PRKDC_HUMAN	Yes	_QGNISSQVPIK(de)R_	3158	1	NO	NO	0.464216	1.77606
9260	P78527	PRKDC_HUMAN	Yes	_MKISDFNDITNMIIIK(de)MNK_	3669	1	NO	NO	0.284823	0.637242
9261	P78527	PRKDC_HUMAN	Yes	_MNK(de)DSKPPGNIK_	3672	1	NO	NO	-0.134599	0.0320998
9262	P78527	PRKDC_HUMAN	Yes	_IYSIAIHPNAFK(de)R_	1074	1	NO	NO	1.12553	0.567368
9265	P78527	PRKDC_HUMAN	Yes	_K(de)FIQTFGK_	3631	1	NO	NO	0.262328	0.936167
9266	P78527	PRKDC_HUMAN	Yes	_K(de)GGSWIQEINVAEKNWYPR_	4023	1	NO	NO	0.917591	0.643424
9267	P78527	PRKDC_HUMAN	Yes	_K(de)HVSINK_	1141	1	NO	NO	-0.0436596	0.0468465
9268	P78527	PRKDC_HUMAN	Yes	_K(de)IAGANPAVITCDEIIIGHEKAPAFR_	4050	1	NO	NO	0.67507	0.184107
9269	P78527	PRKDC_HUMAN	Yes	_MGYYK(de)IIDVMYSR_	1875	1	NO	NO	-0.676664	0.181117
9270	P78527	PRKDC_HUMAN	Yes	_KQNNFSIAMK(de)IIK_	3257	1	NO	NO	0.321385	0.985178
9271	P78527	PRKDC_HUMAN	Yes	_K(de)YIEIR_	2003	1	NO	NO	0.124201	0.204913
9272	P78527	PRKDC_HUMAN	Yes	_MK(de)QDAQVVIYR_	2764	1	NO	NO	0.314619	1.09683
9273	P78527	PRKDC_HUMAN	Yes	_MMPK(de)IKPVEIR_	2445	1	NO	NO	1.44568	0.466891
9274	P78527	PRKDC_HUMAN	Yes	_MSGK(de)HDVGAYMIMYK_	3849	1	NO	NO	-0.867201	0.263549
9276	P78527	PRKDC_HUMAN	Yes	_NIEK(de)MYER_	3608	1	NO	NO	0.34039	1.73466
9279	P78527	PRKDC_HUMAN	Yes	_NIIIFENIIDIK(de)R_	1985	1	NO	NO	-0.329098	0.401897
9280	P78527	PRKDC_HUMAN	Yes	_NTCTSVYTK(de)DR_	117	1	NO	NO	0.106017	0.301585
9282	P78527	PRKDC_HUMAN	Yes	_SPVNTK(de)SIFKR_	1057	1	NO	NO	-0.56602	0.136497
9283	P78527	PRKDC_HUMAN	Yes	_QK(de)VCIDIIYK_	2433	1	NO	NO	0.276641	0.0610959
9284	P78527	PRKDC_HUMAN	Yes	_SCK(de)FSMK_	3235	1	NO	NO	0.959322	0.542903
9286	P78527	PRKDC_HUMAN	Yes	_YFEGVSPKSIK(de)_	692	1	NO	NO	-1.10073	0.228332
9287	P78527	PRKDC_HUMAN	Yes	_SK(de)DFVQVMR_	2418	1	NO	NO	1.84211	0.670694
9288	P78527	PRKDC_HUMAN	Yes	_SQGCSEQVITVIK(de)TVSIIDENNVSSYISK_	3302	1	NO	NO	1.26468	0.757777
9289	P78527	PRKDC_HUMAN	Yes	_TVSIIDENNVSSYISK(de)NIIAFR_	3318	1	NO	NO	-0.48061	0.16988
9290	P78527	PRKDC_HUMAN	Yes	_SSFDWITGSSTDPIVDHTSPSSDSIIFAHK(de)R_	2683	1	NO	NO	-0.857197	0.347093
9291	P78527	PRKDC_HUMAN	Yes	_TK(de)NISSNEAISIEEIR_	838	1	NO	NO	0.113324	0.307319
9293	P78527	PRKDC_HUMAN	Yes	_YNYSK(de)CTVVVR_	1334	1	NO	NO	1.94338	0.908791
9296	P78527	PRKDC_HUMAN	Yes	_WK(de)VPTYKDYVDIFR_	520	1	NO	NO	-0.876236	0.21939
9297	P78527	PRKDC_HUMAN	Yes	_WVEIAK(de)IYR_	2928	1	NO	NO	-0.756221	0.341105
9483	Q00534	CDK6_HUMAN	Yes	_DIK(de)PQNIIVTSSGQIK_	147	1	NO	NO	0.446477	0.109258
9484	Q00535	CDK5_HUMAN	Yes	_DIK(de)PQNIIINR_	128	1	NO	NO	-0.305411	0.175628
9485	Q00535	CDK5_HUMAN	Yes	_NRETHEIVAIK(de)R_	33	1	NO	NO	-0.306155	0.147753
9488	Q00535	CDK5_HUMAN	Yes	_(ac)MQKYEK(de)IEK_	6	1	NO	NO	-0.629303	0.34779
9783	Q02750	MP2K1_HUMAN	Yes	_IMHRDVK(de)PSNIIVNSR_	192	1	NO	NO	0.266501	0.170462
9927	Q05397	FAK1_HUMAN	Yes	_CIGEGQFGDVHQGIYMSPENPAIAVAIK(de)TCK_	454	1	NO	NO	0.909666	0.240903
9928	Q05397	FAK1_HUMAN	Yes	_EK(de)FIQEAITMR_	467	1	NO	NO	-1.96458	0.453272
9929	Q05397	FAK1_HUMAN	Yes	_YMEDSTYYK(de)ASK_	578	1	NO	NO	1.68345	0.554147
9941	Q05655	KPCD_HUMAN	Yes	_K(de)PTMYPEWK_	48	1	NO	NO	-0.307145	0.0580327
10053	Q07912	ACK1_HUMAN	Yes	_TVSVAVK(de)CIKPDVISQPEAMDDFIR_	158	1	NO	NO	0.365216	0.0833475
10388	Q12851	M4K2_HUMAN	Yes	_DIK(de)GANIIITIQGDVK_	138	1	NO	NO	0.0999604	0.0157748
10389	Q12851	M4K2_HUMAN	Yes	_DTVTSEIAAVK(de)IVKIDPGDDISSIQQEITIIR_	45	1	NO	NO	-0.0639841	0.0122467
10475	Q13043	STK4_HUMAN	Yes	_DIK(de)AGNIIINTEGHAK_	151;148	2	NO	NO	-1.12579	0.894034
10497	Q13131	AAPK1_HUMAN	Yes	_DIK(de)PENVIIDAHM(ox)NAK_	152	2	NO	NO	-0.667597	0.327798
10498	Q13131	AAPK1_HUMAN	Yes	_EIQNIK(de)IFR_	80	2	NO	NO	-1.22781	0.613667
10500	Q13131	AAPK1_HUMAN	Yes	_VK(de)VGKHEITGHK_	42	1	NO	NO	0.23686	0.0402324
10501	Q13131	AAPK1_HUMAN	Yes	_SIDVVGK(de)IR_	71	1	NO	NO	0.38657	0.0734567
10502	Q13131	AAPK1_HUMAN	Yes	_VAVK(de)IINR_	56	2	NO	NO	-0.345847	0.270794
10526	Q13177	PAK2_HUMAN	Yes	_GTEAPAVVTEEEDDDEETAPPVIAPRPDHTK(de)SIYTR_	191	1	NO	NO	-1.47297	0.675539
10529	Q13177	PAK2_HUMAN	Yes	_IIQTSNITK(de)IEQK_	113	2	NO	NO	-1.40085	0.77863
10530	Q13177	PAK2_HUMAN	Yes	_K(de)EIIINEIIVMK_	288	1	NO	NO	-0.606149	0.188514
10531	Q13177	PAK2_HUMAN	Yes	_KNPQAVIDVIK(de)FYDSNTVK_	128	2	NO	NO	-1.65552	0.589998
10532	Q13177	PAK2_HUMAN	Yes	_QINIQK(de)QPK_	284	1	NO	NO	-0.679842	0.491968
10545	Q13188	STK3_HUMAN	Yes	_ESGQVVAIK(de)QVPVESDIQEIIKEISIMQQCDSPYVVK_	56	1	NO	NO	-0.0749349	0.0480247
10604	Q13308	PTK7_HUMAN	Yes	_WIEAGPVVIK(de)HPASEAEIQPQTQVTIR_	132	1	NO	NO	1.46171	0.364556
10639	Q13418	ILK_HUMAN	Yes	_WQGNDIVVK(de)VIK_	220	1	NO	NO	0.723415	0.561648
10640	Q13418	ILK_HUMAN	Yes	_HSGIDFK(de)QINFITK_	191	1	NO	NO	1.04543	0.254181
10641	Q13418	ILK_HUMAN	Yes	_QINFITK(de)INENHSGEIWK_	198	1	NO	NO	2.27346	0.708256
10642	Q13418	ILK_HUMAN	Yes	_IPYK(de)DTFWK_	165	1	NO	NO	1.00414	0.323574
10643	Q13418	ILK_HUMAN	Yes	_ISMADVK(de)FSFQCPGR_	341	1	NO	NO	0.648051	0.502406
10709	Q13464	ROCK1_HUMAN	Yes	_K(de)IQIEINQEREK_	1036	1	NO	NO	-0.0688027	0.070261
10710	Q13464	ROCK1_HUMAN	Yes	_VYAMK(de)IISK_	105	1	NO	NO	0.236664	0.0493255
10742	Q13523	PRP4B_HUMAN	Yes	_DFK(de)ENPNIR_	659	1	NO	NO	-0.280231	0.0956276
10744	Q13523	PRP4B_HUMAN	Yes	_CNIIHADIK(de)PDNIIVNESK_	817	1	NO	NO	-1.08227	0.27995
10748	Q13535	ATR_HUMAN	Yes	_AK(de)WIWSK_	1961	1	NO	NO	0.407817	0.100089
10749	Q13535	ATR_HUMAN	Yes	_FYIMMCK(de)PKDDIR_	2327	1	NO	NO	-0.561779	0.10633
10750	Q13535	ATR_HUMAN	Yes	_K(de)AGHHQTAYNAIINAGESR_	1933	1	NO	NO	-0.424762	0.0973292
10758	Q13555	KCC2G_HUMAN	Yes	_DHQK(de)IER_	57;57	4	NO	NO	2.62207	1.05632
10759	Q13555	KCC2G_HUMAN	Yes	_DIK(de)PENIIIASK_	138	1	NO	NO	2.25822	0.927272
10760	Q13555	KCC2G_HUMAN	Yes	_TSTQEYAAK(de)IINTKK_	43	1	NO	NO	2.16796	1.9428
10761	Q13557	KCC2D_HUMAN	Yes	_IPTGQEYAAK(de)IINTKK_	43	1	NO	NO	0.811126	1.8392
10762	Q13557	KCC2D_HUMAN	Yes	_DIKPENIIIASK(de)SK_	147	3	NO	NO	1.20513	0.369648
10763	Q13557	KCC2D_HUMAN	Yes	_IK(de)GAIITTMIATR_	301	3	NO	NO	0.0320207	0.0058314
10904	Q13873	BMPR2_HUMAN	Yes	_IK(de)FGSKHK_	772	1	NO	NO	0.655151	0.200596
10925	Q14012	KCC1A_HUMAN	Yes	_IVAIK(de)CIAK_	49	1	NO	NO	1.1598	0.254301
10986	Q14164	IKKE_HUMAN	Yes	_DIK(de)PGNIMR_	137;137	2	NO	NO	0.816732	0.178028
10987	Q14164	IKKE_HUMAN	Yes	_SGEIVAVK(de)VFNTTSYIRPR_	38	1	NO	NO	0.593544	0.14917
11469	Q15139	KPCD1_HUMAN	Yes	_DVAIK(de)IIDKIR_	612	1	NO	NO	1.24561	0.307531
11471	Q15139	KPCD1_HUMAN	Yes	_NIVHCDIK(de)PENVIIASADPFPQVK_	708;676	2	NO	NO	3.48712	0.930593
11629	Q15208	STK38_HUMAN	Yes	_KDTGHVYAMK(de)IIR_	118	1	NO	NO	0.687985	0.696853
11630	Q15208	STK38_HUMAN	Yes	_ISDFGICTGIK(de)K(de)AHR_	238;239	2	NO	NO	-1.39294	0.446877
11631	Q15208	STK38_HUMAN	Yes	_K(de)AHRTEFYR_	239;240	2	NO	NO	1.1737	0.767078
11666	Q15349	KS6A2_HUMAN	Yes	_VIGQGSYGK(de)VFIVR_	72	1	NO	NO	0.69263	0.220288
11715	Q15418	KS6A1_HUMAN	Yes	_ITDFGISK(de)EAIDHEKK_	210	1	NO	NO	-0.595944	0.437889
11717	Q15418	KS6A1_HUMAN	Yes	_VIGQGSFGK(de)VFIVR_	75	2	NO	NO	-1.07772	0.278668
11792	Q15746	MYLK_HUMAN	Yes	_IK(de)IIDFGIAR_	1602	1	NO	NO	1.76335	0.759824
11793	Q15746	MYLK_HUMAN	Yes	_QGIVHIDIK(de)PENIMCVNK_	1587	1	NO	NO	3.71548	1.18974
11811	Q15831	STK11_HUMAN	Yes	_DIK(de)PGNIIITTGGTIK_	178	1	NO	NO	0.176388	0.268956
11870	Q16539	MK14_HUMAN	Yes	_QEINK(de)TIWEVPER_	15	1	NO	NO	-0.301295	0.0499226
11903	Q16566	KCC4_HUMAN	Yes	_DIK(de)PENIIYATPAPDAPIK_	166	1	NO	NO	-1.84802	0.502304
11905	Q16584	M3K11_HUMAN	Yes	_DIK(de)SNNIIIIQPIESDDM(ox)EHK_	243	1	NO	NO	0.995802	0.335473
12164	Q58A45	PAN3_HUMAN	Yes	_IQK(de)SSNFGYITSCYK_	496	1	NO	NO	-1.50629	0.46725
12165	Q58A45	PAN3_HUMAN	Yes	_VMDPTK(de)IIITGK_	645	1	NO	NO	-0.41229	0.0526384
12394	Q6PHR2	ULK3_HUMAN	Yes	_EVVAIK(de)CVAKK_	44	1	NO	NO	1.53103	0.567401
12395	Q6PHR2	ULK3_HUMAN	Yes	_NISHIDIK(de)PQNIIISSIEKPHIK_	139	1	NO	NO	1.09392	0.787639
12495	Q7KZI7	MARK2_HUMAN	Yes	_EVAVK(de)IIDKTQINSSSIQK_	82	1	NO	NO	0.777863	0.566486
12534	Q7L7X3	TAOK1_HUMAN	Yes	_DIK(de)AGNIIITEPGQVK_	153;149	2	NO	NO	0.304835	0.249397
12535	Q7L7X3	TAOK1_HUMAN	Yes	_K(de)IIFQEAHNGPAVEAQEEEEEQDHGVGR_	314	1	NO	NO	0.0961602	0.0189223
12539	Q7RTN6	STRAA_HUMAN	Yes	_SVK(de)ASHIIISVDGK_	197	1	NO	NO	0.526525	0.441386
12540	Q7RTN6	STRAA_HUMAN	Yes	_YSVK(de)VIPWISPEVIQQNIQGYDAK_	239	1	NO	NO	0.0723336	0.0769783
12605	Q86SG6	NEK8_HUMAN	Yes	_DIK(de)TQNIIIDKHR_	130	1	NO	NO	0.82715	0.250284
12606	Q86SG6	NEK8_HUMAN	Yes	_IISSK(de)SK_	157	1	NO	NO	-1.12132	0.585417
12633	Q86UE8	TLK2_HUMAN	Yes	_YINEIKPPIIHYDIK(de)PGNIIIVNGTACGEIK_	594	1	NO	NO	-2.7705	0.682723
12634	Q86UE8	TLK2_HUMAN	Yes	_YVAVK(de)IHQINK_	491	1	NO	NO	-0.0738487	0.126217
12720	Q8IU85	KCC1D_HUMAN	Yes	_IFAVK(de)CIPK_	52	1	NO	NO	1.94837	0.424844
12730	Q8IVH8	M4K3_HUMAN	Yes	_DIK(de)GANIIITDNGHVK_	138	1	NO	NO	0.083877	0.0647207
12781	Q8IZL9	CDK20_HUMAN	Yes	_DIK(de)PANIIISASGQIK_	129	1	NO	NO	1.1435	0.32917
12846	Q8NB16	MLKL_HUMAN	Yes	_GEYHRAPVAIK(de)VFK_	230	1	NO	NO	1.6541	0.406365
12847	Q8NB16	MLKL_HUMAN	Yes	_EK(de)TDRVK_	367	1	NO	NO	-0.079899	0.0219334
12849	Q8NB16	MLKL_HUMAN	Yes	_IHHSEAPEIHGK(de)IR_	331	1	NO	NO	-0.972011	0.228507
12980	Q8TD19	NEK9_HUMAN	Yes	_DIK(de)TINIFITK_	178	1	NO	NO	-0.0749703	0.0875916
12996	Q8TDX7	NEK7_HUMAN	Yes	_DIK(de)PANVFITATGVVK_	163	2	NO	NO	0.0114956	0.0062621
13079	Q8WZ42	TITIN_HUMAN	Yes	_HIK(de)DIK_	3065	1	NO	NO	0.691946	0.157458
13470	Q96GX5	GWL_HUMAN	Yes	_KADMINK(de)NMTHQVQAER_	72	1	NO	NO	0.492263	0.109829
13471	Q96GX5	GWL_HUMAN	Yes	_DIK(de)PDNMIISNEGHIK_	158	1	NO	NO	-0.977325	0.171955
13472	Q96GX5	GWL_HUMAN	Yes	_GAFGK(de)VYIGQK_	48	1	NO	NO	-0.610419	0.182173
13473	Q96GX5	GWL_HUMAN	Yes	_IYAVK(de)VVK_	62	1	NO	NO	0.401905	0.0796879
13521	Q96J92	WNK4_HUMAN	Yes	_DIK(de)CDNVFITGPTGSVK_	304	1	NO	NO	-1.85606	0.590033
13522	Q96J92	WNK4_HUMAN	Yes	_IGDIGIATIK(de)R_	328;375	3	NO	NO	-0.109631	0.094087
13536	Q96KB5	TOPK_HUMAN	Yes	_ASQDPFPAAIIIK(de)VAINMAR_	145	1	NO	NO	0.0448127	0.0172072
13547	Q96L34	MARK4_HUMAN	Yes	_EVAIK(de)IIDKTQINPSSIQK_	88	1	NO	NO	0.499641	0.0992646
13571	Q96PY6	NEK1_HUMAN	Yes	_DIK(de)SQNIFITK_	130	1	NO	NO	0.654196	0.138121
13572	Q96Q15	SMG1_HUMAN	Yes	_DTVTIHSVGGTITIIPTK(de)TKPK_	2134	1	NO	NO	-2.20043	0.473516
13590	Q96QT4	TRPM7_HUMAN	Yes	_IK(de)QIIGK_	153	1	NO	NO	-0.989442	0.272639
13602	Q96S38	KS6C1_HUMAN	Yes	_VIGVIDK(de)VIIVMDTR_	348	1	NO	NO	-0.546383	0.738178
13603	Q96S44	PRPK_HUMAN	Yes	_FISGIEIVK(de)QGAEAR_	40	1	NO	NO	0.160934	0.701029
13605	Q96SB4	SRPK1_HUMAN	Yes	_KFVAMK(de)VVK_	109	1	NO	NO	0.112348	0.129954
13606	Q96SB4	SRPK1_HUMAN	Yes	_IIHTDIK(de)PENIIISVNEQYIR_	215	1	NO	NO	-1.63322	0.348395
13607	Q96SB4	SRPK1_HUMAN	Yes	_K(de)IIQQVIQGIDYIHTK_	191	1	NO	NO	-1.32469	0.69961
13608	Q96SB4	SRPK1_HUMAN	Yes	_K(de)VIAIQAR_	4	1	NO	NO	0.193014	0.0853221
13758	Q99759	M3K3_HUMAN	Yes	_DIK(de)GANIIR_	491;485	2	NO	NO	0.0891207	0.0646982
13759	Q99759	M3K3_HUMAN	Yes	_IGDFGASK(de)R_	512;506	2	NO	NO	1.8378	0.810507
13843	Q99986	VRK1_HUMAN	Yes	_FGSDIQK(de)IYEANAKR_	140	1	NO	NO	-1.04001	0.228352
14010	Q9BVS4	RIOK2_HUMAN	Yes	_QVVESVGNQMGVGK(de)ESDIYIVANEEGQQFAIK_	105	1	NO	NO	2.16092	0.630191
14098	Q9BZL6	KPCD2_HUMAN	Yes	_DVAVK(de)VIDKIR_	580	1	NO	NO	0.551885	0.25326
14147	Q9H093	NUAK2_HUMAN	Yes	_IVAIK(de)SIR_	81	1	NO	NO	-0.253056	0.0589454
14187	Q9H2G2	SLK_HUMAN	Yes	_IIHRDIK(de)AGNIIFTIDGDIK_	157	1	NO	NO	0.0617934	0.0441178
14189	Q9H2G2	SLK_HUMAN	Yes	_FIQK(de)EEQR_	839	1	NO	NO	-0.638393	0.141718
14190	Q9H2G2	SLK_HUMAN	Yes	_TK(de)DSGSISIQETR_	775	1	NO	NO	-0.497811	0.137944
14192	Q9H2K8	TAOK3_HUMAN	Yes	_FATIK(de)SASIVTR_	439	1	NO	NO	-0.0274325	0.0076888
14193	Q9H2K8	TAOK3_HUMAN	Yes	_K(de)IIFQETR_	310	1	NO	NO	-0.796795	0.26531
14194	Q9H2K8	TAOK3_HUMAN	Yes	_QTHEK(de)WQDIIK_	65	1	NO	NO	0.366702	0.44985
14233	Q9H4A3	WNK1_HUMAN	Yes	_FQVTTTANK(de)VGR_	1954	1	NO	NO	-0.750854	0.282489
14234	Q9H4A3	WNK1_HUMAN	Yes	_GSFK(de)TVYK_	233	2	NO	NO	0.305843	0.0870067
14331	Q9HCP0	KC1G1_HUMAN	Yes	_CCCFFK(de)R_	411;436	3	NO	NO	-1.24122	0.446707
14487	Q9NRM7	LATS2_HUMAN	Yes	_VDTHAIYAMK(de)TIR_	697	1	NO	NO	1.88166	0.449807
14618	Q9NWZ3	IRAK4_HUMAN	Yes	_DIK(de)SANIIIDEAFTAK_	313	1	NO	NO	0.266672	0.253723
14844	Q9P289	STK26_HUMAN	Yes	_DIK(de)AANVIISEQGDVK_	146	2	NO	NO	2.15554	0.695201
14845	Q9P289	STK26_HUMAN	Yes	_K(de)TSYITEIIDR_	280;292	2	NO	NO	-1.88434	0.557769
14926	Q9P2K8	E2AK4_HUMAN	Yes	_DIK(de)PVNIFIDSDDHVK_	850	1	NO	NO	-1.21016	0.252201
14927	Q9P2K8	E2AK4_HUMAN	Yes	_VQNKIDGCCYAVK(de)R_	619	1	NO	NO	-1.04991	0.271564
14957	Q9UBS0	KS6B2_HUMAN	Yes	_DIK(de)PENIM(ox)ISSQGHIK_	196	1	NO	NO	0.501669	0.155094
14992	Q9UEW8	STK39_HUMAN	Yes	_AIK(de)TITFK_	515	1	NO	NO	0.070588	0.0181808
14993	Q9UEW8	STK39_HUMAN	Yes	_DAYEIQEVIGSGATAVVQAAICK(de)PR_	83	1	NO	NO	0.303784	0.0814646
14994	Q9UEW8	STK39_HUMAN	Yes	_EYIIEK(de)IITR_	349	1	NO	NO	-0.251339	0.0659487
14995	Q9UEW8	STK39_HUMAN	Yes	_FFQK(de)AK_	339	1	NO	NO	0.266256	0.0537575
15168	Q9UKE5	TNIK_HUMAN	Yes	_IEK(de)FDR_	655	1	NO	NO	3.04651	1.17156
15169	Q9UKI8	TLK1_HUMAN	Yes	_YAAVK(de)IHQINK_	485	1	NO	NO	1.23014	1.11921
15170	Q9UKI8	TLK1_HUMAN	Yes	_YINEIKPPIIHYDIK(de)PGNIIIVDGTACGEIK_	588	1	NO	NO	-1.713	0.325134
15211	Q9UL54	TAOK2_HUMAN	Yes	_DVK(de)AGNIIISEPGIVK_	153	1	NO	NO	1.69758	0.584976
15433	Q9Y2H1	ST38L_HUMAN	Yes	_DIK(de)PDNIIIDAK_	215	1	NO	NO	2.3155	0.942571
15434	Q9Y2H1	ST38L_HUMAN	Yes	_KDTGHIYAMK(de)IIR_	119	1	NO	NO	0.68387	0.605729
15470	Q9Y2U5	M3K2_HUMAN	Yes	_VYICYDVDTGREIAVK(de)QVQFDPDSPETSK_	385	1	NO	NO	1.4357	0.30666
15471	Q9Y2U5	M3K2_HUMAN	Yes	_TISIFMEYMPGGSIK(de)DQIK_	446	1	NO	NO	0.971776	0.242563
15708	Q9Y4K4	M4K5_HUMAN	Yes	_DIK(de)GANIIITDHGDVKIADFGVAAK_	142	1	NO	NO	-2.07154	0.804426
15709	Q9Y4K4	M4K5_HUMAN	Yes	_IADFGVAAK(de)ITATIAK_	164	1	NO	NO	-2.51988	1.25749
15712	Q9Y4K4	M4K5_HUMAN	Yes	_NVHTGEIAAVK(de)IIK_	49	1	NO	NO	-2.26185	0.660985
15855	Q9Y6E0	STK24_HUMAN	Yes	_DIK(de)AANVIISEHGEVK_	158	1	NO	NO	-0.43934	0.523137
15856	Q9Y6E0	STK24_HUMAN	Yes	_HK(de)FIIR_	284	1	NO	NO	0.18258	0.0469647
15883	Q9Y6M4	KC1G3_HUMAN	Yes	_DVK(de)PENFIIGRPGNK_	164	1	NO	NO	-0.384735	0.301465
15899	Q9Y6R4	M3K4_HUMAN	Yes	_DIK(de)GANIFITSSGIIK_	1465	1	NO	NO	0.0539296	0.0107007
15900	Q9Y6R4	M3K4_HUMAN	Yes	_VYTCISVDTGEIMAMK(de)EIR_	1372	1	NO	NO	0.533255	0.109462
0	A0AVT1	UBA6_HUMAN	No	_SDIQM(ox)AVISFEK(de)DDDHNGHIDFITAASNIR_	851	1	NO	NO	-1.3348	0.48163
1	A0AVT1	UBA6_HUMAN	No	_GMITVTDPDIIEK(de)SNINR_	503	1	NO	NO	0.310676	0.0713779
3	A0AVT1	UBA6_HUMAN	No	_IDAHINK(de)VCPTTETIYNDEFYTKQDVIITAIDNVEAR_	544	1	NO	NO	-0.0947196	0.0160265
5	A0AVT1	UBA6_HUMAN	No	_NIVIAGIK(de)AVTIHDTEK_	86	1	NO	NO	-0.561153	0.186848
6	A0FGR8	ESYT2_HUMAN	No	_MK(de)IAIR_	649	2	NO	NO	-1.19619	0.381628
7	A0FGR8	ESYT2_HUMAN	No	_GK(de)SDPYGIIR_	411	1	NO	NO	0.574288	0.133883
9	A0FGR8	ESYT2_HUMAN	No	_K(de)TINPVFDQSFDFSVSIPEVQRR_	846	1	NO	NO	1.19027	0.408672
10	A0FGR8	ESYT2_HUMAN	No	_MYIIPDK(de)R_	833	1	NO	NO	-0.338123	0.0871029
11	A0FGR8	ESYT2_HUMAN	No	_NK(de)IIVVVHACR_	802	1	NO	NO	0.826995	0.265043
12	A0FGR8	ESYT2_HUMAN	No	_TIDVAVK(de)NSGGFISKDK_	875	1	NO	NO	-0.389375	0.436084
13	A0FGR8	ESYT2_HUMAN	No	_VIK(de)ENISPK_	431	1	NO	NO	0.945252	0.279068
15	A1L0T0	ILVBL_HUMAN	No	_EQVPSIGSNVACGIAYTDYHK(de)AAMGIGAR_	577	1	NO	NO	1.17446	0.400703
18	A3KMH1	VWA8_HUMAN	No	_GCGK(de)TVIAK_	453	1	NO	NO	-0.276657	0.175237
21	P42356	PI4KA_HUMAN	No	_SGTPMQSAAK(de)APYIAK_	1742	2	NO	NO	1.32548	0.338147
26	A6NHG4	DDTL_HUMAN	No	_PFIEIDTNIPANRVPAGIEK(de)R_	21	2	NO	NO	-0.229546	0.0410268
28	A9Z1Z3	FR1L4_HUMAN	No	_IIAK(de)IR_	647	6	NO	NO	0.418945	0.107157
29	B5ME19	EIFCL_HUMAN	No	_AK(de)EIIGQGIIIR_	644	2	NO	NO	-1.25376	0.456507
30	B5ME19	EIFCL_HUMAN	No	_AK(de)SIVDKEGVPR_	94	2	NO	NO	0.167746	0.876781
31	B5ME19	EIFCL_HUMAN	No	_SIVDK(de)EGVPR_	99	2	NO	NO	0.367927	0.444132
32	B5ME19	EIFCL_HUMAN	No	_MGDWK(de)TCHSFIINEK_	751	2	NO	NO	-0.044899	0.0812042
33	B5ME19	EIFCL_HUMAN	No	_EHVVAASK(de)AMK_	743	2	NO	NO	-0.876894	0.370661
34	B5ME19	EIFCL_HUMAN	No	_K(de)INEIIQAR_	333	2	NO	NO	0.678527	0.307653
35	B5ME19	EIFCL_HUMAN	No	_K(de)NEGYMR_	895	2	NO	NO	0.217843	0.287645
36	B5ME19	EIFCL_HUMAN	No	_K(de)SEAPSGESR_	200	2	NO	NO	-0.345786	0.0817241
37	B5ME19	EIFCL_HUMAN	No	_MFAK(de)GTEITHAVVIK_	321	2	NO	NO	0.660953	0.172665
38	B5ME19	EIFCL_HUMAN	No	_MNGK(de)VWDIFPEADKVR_	765	2	NO	NO	-0.755129	0.222901
41	B5ME19	EIFCL_HUMAN	No	_TEPTAQQNIAIQIAEK(de)IGSIVENNER_	863	2	NO	NO	0.116692	0.186706
42	B5ME19	EIFCL_HUMAN	No	_VFDHK(de)QGTYGGYFR_	878	2	NO	NO	-0.00596463	0.00849201
45	C9JLW8	F195B_HUMAN	No	_TFKPIDISDIK(de)R_	87	1	NO	NO	-2.57067	1.4985
192	E9PAV3	NACAM_HUMAN	No	_KAMSK(de)IGIR_	1945	3	NO	NO	-0.19071	0.39531
193	E9PAV3	NACAM_HUMAN	No	_SPASDTYIVFGEAK(de)IEDISQQAQIAAAEKFK_	1990	2	NO	NO	-0.95355	0.395399
194	E9PAV3	NACAM_HUMAN	No	_SK(de)NIIFVITKPDVYK_	1963;99	3	NO	NO	-0.0877239	0.104526
196	O00116	ADAS_HUMAN	No	_K(de)GQIEITGK_	108	1	NO	NO	0.164401	0.133952
197	O00116	ADAS_HUMAN	No	_FK(de)GFDPNQISVATIIFEGDREK_	456	1	NO	NO	-0.799194	0.376238
198	O00116	ADAS_HUMAN	No	_K(de)NIYGNIEDIVVHIK_	323	1	NO	NO	1.76437	0.707355
199	O00116	ADAS_HUMAN	No	_NIYGNIEDIVVHIK(de)MVTPR_	337	1	NO	NO	-0.580782	0.167114
200	Q99661	KIF2C_HUMAN	No	_SIIAIK(de)ECIR_	524	2	NO	NO	-0.819268	0.270408
201	O00148	DX39A_HUMAN	No	_AIVDCGFEHPSEVQHECIPQAIIGMDVICQAK(de)SGMGK_	89;90	2	NO	NO	-1.29201	0.332693
202	O00148	DX39A_HUMAN	No	_DFIIK(de)PEIIR_	52;53	2	NO	NO	-0.0322983	0.0727101
203	O00148	DX39A_HUMAN	No	_DIK(de)GSYVSIHSSGFR_	35	1	NO	NO	0.206392	0.321429
204	O00148	DX39A_HUMAN	No	_EIAFQISK(de)EYER_	130;131	2	NO	NO	-1.30102	0.473866
205	O00148	DX39A_HUMAN	No	_FGTK(de)GIAITFVSDENDAK_	383;384	2	NO	NO	-0.0329597	0.169384
206	O00148	DX39A_HUMAN	No	_ITPHEK(de)QCMMFSATISK_	221	1	NO	NO	-0.301487	0.112341
207	O00148	DX39A_HUMAN	No	_SFSIK(de)NVK_	187	1	NO	NO	0.374154	0.0778049
208	O00148	DX39A_HUMAN	No	_YQQFK(de)DFQRR_	333;334	2	NO	NO	-0.69963	0.935338
213	O00151	PDLI1_HUMAN	No	_IVGGK(de)DFEQPIAISR_	22	1	NO	NO	2.06106	0.570042
215	O00151	PDLI1_HUMAN	No	_VWSPIVTEEGK(de)RHPYK_	98	1	NO	NO	1.89912	0.474725
216	O00151	PDLI1_HUMAN	No	_SVK(de)APVTK_	241	1	NO	NO	0.833185	0.165291
218	O00151	PDLI1_HUMAN	No	_VTPGSK(de)AAIANICIGDVITAIDGENTSNMTHIEAQNR_	38	1	NO	NO	2.90624	0.933044
219	O00154	BACH_HUMAN	No	_NVDK(de)VIEVPPVVYSR_	172	1	NO	NO	-1.5277	0.329139
221	O00154	BACH_HUMAN	No	_HCK(de)TNIVTASVDAINFHDKIR_	267	1	NO	NO	-2.44225	0.64905
222	O00154	BACH_HUMAN	No	_TNIVTASVDAINFHDK(de)IR_	283	1	NO	NO	-0.741064	0.858262
224	O00154	BACH_HUMAN	No	_IM(ox)RPDDANVAGNVHGGTIIK(de)MIEEAGAIISTR_	78	1	NO	NO	-1.37764	0.316471
226	O00154	BACH_HUMAN	No	_K(de)GCVITISGR_	286	1	NO	NO	-2.21614	0.573327
227	O00154	BACH_HUMAN	No	_METK(de)WR_	205	1	NO	NO	-1.38157	0.409113
228	O00154	BACH_HUMAN	No	_YEAQK(de)IER_	198	1	NO	NO	-0.605997	0.169237
229	O00154	BACH_HUMAN	No	_YIQMK(de)AK_	369	1	NO	NO	-1.94186	0.909084
230	O00159	MYO1C_HUMAN	No	_K(de)DNYPQSVPR_	885	1	NO	NO	0.586531	0.151086
231	O00159	MYO1C_HUMAN	No	_CIK(de)PNDAK_	627	1	NO	NO	-0.00240678	0.000732343
234	O00159	MYO1C_HUMAN	No	_DQAVMISGESGAGKTEATK(de)R_	151	1	NO	NO	1.83411	0.790064
235	O00159	MYO1C_HUMAN	No	_EICIK(de)NMVWK_	853	1	NO	NO	2.02307	0.636222
236	O00159	MYO1C_HUMAN	No	_NMVWK(de)YCR_	858	1	NO	NO	2.3189	0.740834
237	O00159	MYO1C_HUMAN	No	_FGK(de)YMDVQFDFK_	200	1	NO	NO	1.74899	0.767017
238	O00159	MYO1C_HUMAN	No	_YMDVQFDFK(de)GAPVGGHIISYIIEK_	209	1	NO	NO	0.302117	0.0671895
240	O00159	MYO1C_HUMAN	No	_HIGYKPEEYK(de)MGR_	709	1	NO	NO	-0.182105	0.0881198
241	O00159	MYO1C_HUMAN	No	_HQVK(de)YIGIIENIR_	647	1	NO	NO	-0.0124634	0.00251065
242	O00159	MYO1C_HUMAN	No	_IICDIVEEK(de)FK_	486	1	NO	NO	-0.527453	0.125721
243	O00159	MYO1C_HUMAN	No	_K(de)YEAFIQR_	667	1	NO	NO	0.378766	0.570948
246	O00159	MYO1C_HUMAN	No	_NPQSYIYIVK(de)GQCAK_	269	1	NO	NO	1.48648	0.435925
249	O00159	MYO1C_HUMAN	No	_QK(de)GDVVIQSDHVIETITKTAISANR_	989	1	NO	NO	-0.00627247	0.00131617
250	O00159	MYO1C_HUMAN	No	_QSIATK(de)IQAAWR_	740	1	NO	NO	1.10584	0.264632
252	O00159	MYO1C_HUMAN	No	_SISPEWK(de)QQIQQK_	868	1	NO	NO	0.94654	0.245362
253	O00159	MYO1C_HUMAN	No	_TFTWIVGK(de)INR_	396	1	NO	NO	0.283458	0.0897788
254	O00159	MYO1C_HUMAN	No	_TK(de)IFIRFPK_	714	2	NO	NO	1.033	0.411265
255	O00159	MYO1C_HUMAN	No	_VIQAIGSEPIQYAVPVVK(de)YDRK_	927	1	NO	NO	-0.847341	0.147117
258	O00170	AIP_HUMAN	No	_GK(de)AHAAVWNAQEAQADFAK_	273	1	NO	NO	0.762829	0.231354
259	O00178	GTPB1_HUMAN	No	_INDTIIIGPDPIGNFISIAVK(de)SIHR_	443	1	NO	NO	0.146665	0.0483903
260	O00193	SMAP_HUMAN	No	_SNYK(de)MMFVK_	174	1	NO	NO	1.31674	0.321033
261	O00193	SMAP_HUMAN	No	_ESHPHGVK(de)R_	13	1	NO	NO	0.173349	0.0378483
263	O00193	SMAP_HUMAN	No	_IVIGDHK(de)STSHFR_	62	1	NO	NO	0.990299	0.485321
265	O00203	AP3B1_HUMAN	No	_IYITNSKQTK(de)_	552	2	NO	NO	-2.12159	1.43985
267	O00231	PSD11_HUMAN	No	_AEIRDDPIISTHIAK(de)IYDNIIEQNIIR_	325	1	NO	NO	-0.216192	0.0529839
268	O00231	PSD11_HUMAN	No	_AIIVEVQIIESK(de)TYHAISNIPK_	175	1	NO	NO	-1.07926	0.283609
269	O00231	PSD11_HUMAN	No	_TYHAISNIPK(de)AR_	185	1	NO	NO	-0.860744	0.298929
271	O00231	PSD11_HUMAN	No	_EASIDIIHSIVK(de)R_	32	1	NO	NO	-0.344749	0.0726813
272	O00231	PSD11_HUMAN	No	_DIQENDEEAVQVK(de)EQSIIEIGSIIAK_	46	1	NO	NO	-0.0598429	0.0132188
273	O00231	PSD11_HUMAN	No	_EQSIIEIGSIIAK(de)TGQAAEIGGIIK_	59	1	NO	NO	0.198068	0.285597
274	O00231	PSD11_HUMAN	No	_TGQAAEIGGIIK(de)YVRPFINSISK_	71	1	NO	NO	-0.92704	0.526149
275	O00231	PSD11_HUMAN	No	_IMINTPEDVQAIVSGK(de)IAIR_	274	1	NO	NO	0.324293	0.0935914
276	O00231	PSD11_HUMAN	No	_IVSIYFDTK(de)R_	141	1	NO	NO	-2.26386	0.761094
277	O00231	PSD11_HUMAN	No	_K(de)ISQMIIDKK_	364	1	NO	NO	-0.29179	0.102638
278	O00231	PSD11_HUMAN	No	_QTEAIK(de)CVAQASK_	288	1	NO	NO	-0.13345	0.395984
279	O00231	PSD11_HUMAN	No	_SIADFEK(de)AITDYR_	304	1	NO	NO	0.961985	0.257219
280	O00231	PSD11_HUMAN	No	_YVRPFINSISK(de)AK_	82	1	NO	NO	-1.48455	0.771609
281	O00231	PSD11_HUMAN	No	_VQIEHISSIIK(de)ISK_	355	1	NO	NO	-0.20551	0.0380021
282	O00231	PSD11_HUMAN	No	_VVDSIYNK(de)AK_	417	1	NO	NO	1.93435	0.583596
283	O00232	PSD12_HUMAN	No	_DIIK(de)IFTTMEIMR_	307	1	NO	NO	-0.167484	0.0548236
285	O00232	PSD12_HUMAN	No	_ICIAVK(de)DYIR_	197	1	NO	NO	-1.76259	1.17012
286	O00232	PSD12_HUMAN	No	_IMAK(de)YYTR_	368	1	NO	NO	0.0747722	0.0161231
287	O00232	PSD12_HUMAN	No	_TTHIIAK(de)EEMIHNIQ_	448	1	NO	NO	-1.4615	0.724378
288	O00232	PSD12_HUMAN	No	_IQEVIETIISIEK(de)QTR_	52	1	NO	NO	-0.151334	0.218113
289	O00232	PSD12_HUMAN	No	_KGSIESPATDVFGSTEEGEK(de)R_	349	1	NO	NO	-1.63875	0.708061
290	O00232	PSD12_HUMAN	No	_SQIK(de)QAVAK_	98	1	NO	NO	-0.675738	0.327955
293	O00233	PSMD9_HUMAN	No	_HNIICIQNDHK(de)AVM(ox)K_	87	1	NO	NO	-0.424349	0.603477
294	O00233	PSMD9_HUMAN	No	_K(de)IGQSESQGPPR_	123	1	NO	NO	0.759728	1.95548
295	O00233	PSMD9_HUMAN	No	_WAGK(de)GIIGCNIIPIQR_	211	1	NO	NO	-0.0820358	0.0214909
299	O00244	ATOX1_HUMAN	No	_PK(de)HEFSVDMTCGGCAEAVSR_	3	1	NO	NO	-1.70826	0.725647
301	O00244	ATOX1_HUMAN	No	_VINK(de)IGGVK_	25	1	NO	NO	-1.94751	0.788535
302	O00264	PGRC1_HUMAN	No	_IIMAINGK(de)VFDVTK_	96	1	NO	NO	-0.110905	0.0352364
303	O00264	PGRC1_HUMAN	No	_VFDVTK(de)GR_	102	1	NO	NO	0.266234	0.320986
304	O00264	PGRC1_HUMAN	No	_K(de)FYGPEGPYGVFAGR_	105	1	NO	NO	0.665058	1.0249
305	O00264	PGRC1_HUMAN	No	_YHHVGK(de)IIK_	169	1	NO	NO	2.14345	0.838985
307	O00267	SPT5H_HUMAN	No	_MSIK(de)DWFAK_	323	1	NO	NO	-0.789688	0.238223
308	O00299	CLIC1_HUMAN	No	_(ac)AEEQPQVEIFVK(de)AGSDGAK_	13	1	NO	NO	1.06253	0.305292
309	O00299	CLIC1_HUMAN	No	_AGSDGAK(de)IGNCPFSQR_	20	1	NO	NO	0.361156	0.164566
310	O00299	CLIC1_HUMAN	No	_K(de)FIDGNEITIADCNIIPK_	166	1	NO	NO	-0.652801	0.189277
311	O00299	CLIC1_HUMAN	No	_EEFASTCPDDEEIEIAYEQVAK(de)AIK_	238	1	NO	NO	-0.761756	0.180741
314	O00299	CLIC1_HUMAN	No	_NSNPAINDNIEK(de)GIIK_	131	1	NO	NO	-1.44265	0.616868
315	O00299	CLIC1_HUMAN	No	_GVTFNVTTVDTK(de)R_	49	1	NO	NO	-0.0680421	0.0131307
316	O00299	CLIC1_HUMAN	No	_IAAINPESNTAGIDIFAK(de)FSAYIK_	113	1	NO	NO	-0.595489	0.165872
317	O00303	EIF3F_HUMAN	No	_IQDAISTVIQYAEDVISGK(de)VSADNTVGR_	297	1	NO	NO	-0.576696	0.175591
318	O00303	EIF3F_HUMAN	No	_MSIK(de)AYVSTIMGVPGR_	214	1	NO	NO	0.0683767	0.018303
322	O00329	PK3CD_HUMAN	No	_VNWIAHNVSK(de)DNRQ_	1040	1	NO	NO	-0.887552	0.220103
328	O00410	IPO5_HUMAN	No	_MCK(de)IIGK_	613	2	NO	NO	-0.0160148	0.0042778
333	O00422	SAP18_HUMAN	No	_EITSIVK(de)EVYPEAR_	74	1	NO	NO	0.515382	0.111259
334	O00422	SAP18_HUMAN	No	_K(de)GTDDSMTIQSQK_	114	1	NO	NO	0.844308	0.584763
337	O00422	SAP18_HUMAN	No	_VK(de)EIGSTMSGR_	104	1	NO	NO	-0.971956	0.210657
339	O00425	IF2B3_HUMAN	No	_FAGASIK(de)IAPAEAPDAK_	440	1	NO	NO	1.8518	1.03804
340	O00425	IF2B3_HUMAN	No	_IAPAEAPDAK(de)VR_	450	1	NO	NO	0.0212807	0.0147671
341	O00425	IF2B3_HUMAN	No	_FTEEIPIK(de)IIAHNNFVGR_	280	1	NO	NO	-1.36113	0.318955
342	O00425	IF2B3_HUMAN	No	_GGK(de)TVNEIQNISSAEVVVPR_	508	1	NO	NO	0.548553	0.175102
343	O00425	IF2B3_HUMAN	No	_K(de)ENAGAAEK_	234	1	NO	NO	0.671756	0.1963
344	O00425	IF2B3_HUMAN	No	_IEIHGKPIEVEHSVPK(de)R_	76	1	NO	NO	1.32577	1.32728
345	O00425	IF2B3_HUMAN	No	_IIGK(de)EGR_	294;294;292	3	NO	NO	0.266867	0.212809
346	O00425	IF2B3_HUMAN	No	_IIVPTQFVGAIIGK(de)EGATIR_	213	1	NO	NO	-0.348406	0.194596
347	O00425	IF2B3_HUMAN	No	_IPVSGPFIVK(de)TGYAFVDCPDESWAIK_	36	1	NO	NO	1.67476	0.824423
348	O00425	IF2B3_HUMAN	No	_K(de)IEQDTDTK_	301	1	NO	NO	-0.219471	0.0558247
349	O00425	IF2B3_HUMAN	No	_KIQEIITQVK(de)QHQQQK_	561	1	NO	NO	0.0968438	0.0204088
350	O00425	IF2B3_HUMAN	No	_QHQQQK(de)AIQSGPPQSR_	567	1	NO	NO	-0.146548	0.0526949
351	O00425	IF2B3_HUMAN	No	_MVIITGPPEAQFK(de)AQGR_	465;465;487	3	NO	NO	-1.28647	0.268143
352	O00425	IF2B3_HUMAN	No	_NITK(de)QTQSK_	223;223	2	NO	NO	0.695538	0.167082
355	O00425	IF2B3_HUMAN	No	_TITVK(de)GNVETCAK_	330	1	NO	NO	1.84421	0.954807
357	O00429	DNM1L_HUMAN	No	_NATGPRPAIFVPEVSFEIIVK(de)R_	418	1	NO	NO	-1.49073	0.755621
358	O00429	DNM1L_HUMAN	No	_SVTDSIRDEYAFIQK(de)K_	271	1	NO	NO	1.89695	0.561222
359	O00429	DNM1L_HUMAN	No	_TSK(de)AEEIIAEEK_	597	1	NO	NO	-1.75644	0.786667
361	O00429	DNM1L_HUMAN	No	_VIPVK(de)IGIIGVVNR_	238	1	NO	NO	0.769551	0.223857
362	O00443	P3C2A_HUMAN	No	_DIVTEDGADPNPYVK(de)TYIIPDNHK_	1597	1	NO	NO	-0.438371	0.0754193
364	O00469	PLOD2_HUMAN	No	_ANHK(de)VVFAADGIIWPDKR_	135	1	NO	NO	1.35006	0.42491
365	O00469	PLOD2_HUMAN	No	_VVFAADGIIWPDK(de)R_	148	1	NO	NO	2.68216	1.06936
366	O00469	PLOD2_HUMAN	No	_CK(de)IFQTINGAVDEVVIKFENGK_	217	1	NO	NO	1.03272	0.231982
367	O00469	PLOD2_HUMAN	No	_IFQTINGAVDEVVIK(de)FENGK_	232	1	NO	NO	1.48554	0.575303
369	O00469	PLOD2_HUMAN	No	_HGK(de)IWSNFWGAISPDGYYAR_	423	1	NO	NO	1.55491	0.58296
370	O00469	PLOD2_HUMAN	No	_IVQQWNIQDNDDDQIFYTK(de)VYIDPIKR_	197	1	NO	NO	1.80863	0.606782
371	O00469	PLOD2_HUMAN	No	_K(de)GWSFMHPGR_	704	1	NO	NO	1.36524	0.444274
374	O00479	HMGN4_HUMAN	No	_AK(de)VKDEPQR_	16;16	2	NO	NO	-1.89467	0.644603
375	O00479	HMGN4_HUMAN	No	_VK(de)DEPQRR_	18;18	2	NO	NO	-0.62658	0.490396
379	O00483	NDUA4_HUMAN	No	_NNPEPWNKIGPNDQYK(de)FYSVNVDYSK_	63	1	NO	NO	1.01122	0.431659
385	O00541	PESC_HUMAN	No	_EYK(de)VFVR_	86	1	NO	NO	2.28636	0.911469
386	O00541	PESC_HUMAN	No	_FIIHEPIVNK(de)FR_	81	1	NO	NO	1.48061	0.442347
388	O00541	PESC_HUMAN	No	_IK(de)IIAIQR_	441	1	NO	NO	-0.227301	0.388712
389	O00541	PESC_HUMAN	No	_K(de)IFEGIK_	325	1	NO	NO	0.46949	0.139692
392	O00541	PESC_HUMAN	No	_K(de)VFISIK_	180	1	NO	NO	-0.98411	0.370023
393	O00541	PESC_HUMAN	No	_TFYIIK(de)DIR_	68	1	NO	NO	-0.0837307	0.0187354
394	O00541	PESC_HUMAN	No	_TGK(de)CHVQTIQICR_	152	1	NO	NO	1.09258	0.384344
396	O00560	SDCB1_HUMAN	No	_DSTGHVGFIFK(de)NGK_	214	1	NO	NO	-2.46372	0.803622
397	O00560	SDCB1_HUMAN	No	_NGK(de)ITSIVK_	217	1	NO	NO	-1.25334	0.307602
400	O00560	SDCB1_HUMAN	No	_VIK(de)QAFGEKITMTIR_	179	1	NO	NO	2.11628	0.621103
401	O00560	SDCB1_HUMAN	No	_IK(de)SIDNGIFVQIVQANSPASIVGIR_	130	1	NO	NO	-0.779585	0.17715
403	O00567	NOP56_HUMAN	No	_AK(de)AIIDASR_	242	1	NO	NO	-2.79262	1.11298
404	O00567	NOP56_HUMAN	No	_EINEDK(de)IEKIEEITMDGAK_	227	1	NO	NO	1.71805	0.524247
405	O00567	NOP56_HUMAN	No	_GNTPK(de)YGIIFHSTFIGR_	347	1	NO	NO	-1.48197	0.396868
406	O00567	NOP56_HUMAN	No	_IDCFSEVPTSVFGEK(de)IR_	396	1	NO	NO	-0.665981	0.179757
407	O00567	NOP56_HUMAN	No	_IHFHNIVK(de)GITDISACK_	134	1	NO	NO	-0.558158	0.107582
408	O00567	NOP56_HUMAN	No	_IIAHAGSITNIAK(de)YPASTVQIIGAEK_	320	1	NO	NO	-0.884497	0.202133
409	O00567	NOP56_HUMAN	No	_YPASTVQIIGAEK(de)AIFR_	333	1	NO	NO	0.938504	0.326547
411	O00567	NOP56_HUMAN	No	_K(de)FSKEEPVSSGPEEAVGK_	561	1	NO	NO	-2.53859	1.2957
412	O00567	NOP56_HUMAN	No	_KIEK(de)QEK_	441	2	NO	NO	-1.79087	0.385969
413	O00567	NOP56_HUMAN	No	_K(de)VIIGVGDPK_	90	1	NO	NO	-0.0373489	0.0334134
416	O00567	NOP56_HUMAN	No	_NIDVMK(de)EAMVQAEEAAAEITR_	422	1	NO	NO	0.0309225	0.00678109
417	O00567	NOP56_HUMAN	No	_K(de)SFSKEEIMSSDIEETAGSTSIPK_	510	1	NO	NO	-1.09258	0.343922
418	O00567	NOP56_HUMAN	No	_STPK(de)EETVNDPEEAGHR_	540	1	NO	NO	0.0562143	0.0186334
420	O00567	NOP56_HUMAN	No	_SK(de)MSQVAPSISAIIGEAVGAR_	288	1	NO	NO	0.312957	0.136655
421	O00567	NOP56_HUMAN	No	_VK(de)FNVNR_	158	1	NO	NO	0.142292	0.0279897
422	O00567	NOP56_HUMAN	No	_YIANK(de)CSIASR_	375	1	NO	NO	0.0110756	0.00219963
426	O00571	DDX3X_HUMAN	No	_GK(de)SSFFSDR_	81	1	NO	NO	-0.796994	0.475679
427	O00571	DDX3X_HUMAN	No	_HTMMFSATFPK(de)EIQMIAR_	387;385	2	NO	NO	-0.401367	0.102425
429	O00571	DDX3X_HUMAN	No	_K(de)QYPISIVIAPTR_	264;262	2	NO	NO	-1.49212	0.804864
430	O00571	DDX3X_HUMAN	No	_NINITK(de)DIIDIIVEAK_	554	1	NO	NO	-0.939568	0.330918
432	O00571	DDX3X_HUMAN	No	_SGK(de)SPIIVATAVAAR_	491;489	2	NO	NO	0.847259	0.220619
434	O00571	DDX3X_HUMAN	No	_YTRPTPVQK(de)HAIPIIK_	208;206	2	NO	NO	-0.0248037	0.0573852
435	O00592	PODXL_HUMAN	No	_ATFNPAQDK(de)CGIR_	394	1	NO	NO	-2.50133	1.01019
436	O00592	PODXL_HUMAN	No	_EITIHTK(de)IPAKDVYER_	418	1	NO	NO	-2.38316	0.729003
437	O00624	NPT3_HUMAN	No	_MDGK(de)PATR_	4	1	NO	NO	-1.09907	0.2528
439	O00625	PIR_HUMAN	No	_IEPHHTAVIGEGDSVQVENK(de)DPKR_	231	1	NO	NO	-1.3698	0.749102
440	O00625	PIR_HUMAN	No	_K(de)VTISVISR_	6	1	NO	NO	-2.16833	0.671757
441	O00625	PIR_HUMAN	No	_NAK(de)NGFER_	275	1	NO	NO	-2.71755	1.22376
444	O00625	PIR_HUMAN	No	_SIGRPEIK(de)NIDPFIIFDEFK_	34	1	NO	NO	-1.75156	0.764728
445	O00625	PIR_HUMAN	No	_SK(de)VYTR_	162	1	NO	NO	-0.837743	0.221822
446	O00625	PIR_HUMAN	No	_TPTIYIDFK(de)IDPGAK_	175	1	NO	NO	0.109426	0.0228412
447	O00746	NDKM_HUMAN	No	_RK(de)PFYPAIIR_	91	1	NO	NO	0.39088	0.659656
448	O00754	MA2B1_HUMAN	No	_IPVSEGVFVVK(de)DPNGR_	538	1	NO	NO	1.7027	1.08988
449	O00764	PDXK_HUMAN	No	_IVYVCDPVIGDK(de)WDGEGSMYVPEDIIPVYKEK_	119	1	NO	NO	-0.988004	0.259744
452	O14556	G3PT_HUMAN	No	_VIPEIK(de)GK_	297	1	NO	NO	-0.608668	0.162971
453	O14556	G3PT_HUMAN	No	_IAQPAPYSAIKEAVK(de)_	335	1	NO	NO	-0.653975	0.152894
454	O14556	G3PT_HUMAN	No	_FGIVEGIMTTVHSYTATQK(de)TVDGPSRK_	258	1	NO	NO	-3.31627	0.776688
455	O14556	G3PT_HUMAN	No	_GAHQNIIPASTGAAK(de)AVTK_	287	1	NO	NO	-2.9177	0.960877
457	O14556	G3PT_HUMAN	No	_VVAVNDPFIDPEYMVYMFK(de)YDSTHGR_	119	1	NO	NO	-1.87974	0.768171
458	O14556	G3PT_HUMAN	No	_YK(de)GSVEFR_	128	1	NO	NO	-2.23771	0.872592
460	O14561	ACPM_HUMAN	No	_VIYVIK(de)IYDKIDPEK_	88	1	NO	NO	-2.06343	0.79846
462	O14562	UBFD1_HUMAN	No	_VTSGAK(de)IMVVGSTINDVIAVNTPK_	149	1	NO	NO	-0.913569	0.227682
463	O14579	COPE_HUMAN	No	_K(de)FGVVIDEIKPSSAPEIQAVR_	65	1	NO	NO	0.0335328	0.0534494
464	O14579	COPE_HUMAN	No	_YISQIK(de)DAHR_	278	1	NO	NO	-1.05723	0.329377
465	O14598	VCY1_HUMAN	No	_K(de)SSSQPSPSGPK_	21	1	NO	NO	-1.51837	0.462662
467	O14598	VCY1_HUMAN	No	_TTK(de)VAEKGEAVR_	37	1	NO	NO	0.139608	0.0587099
468	O14598	VCY1_HUMAN	No	_VAEK(de)GEAVR_	41	1	NO	NO	-2.80092	1.26856
471	O14653	GOSR2_HUMAN	No	_ITIK(de)GTQK_	159	1	NO	NO	-0.738512	0.303888
472	O14653	GOSR2_HUMAN	No	_K(de)IIDIANMIGISNTVMR_	164	1	NO	NO	0.612821	0.2913
474	O14656	TOR1A_HUMAN	No	_KPITISIHGWTGTGK(de)NFVSK_	108	1	NO	NO	0.915787	0.752063
475	O14656	TOR1A_HUMAN	No	_VFSDKGCK(de)TVFTK_	320	1	NO	NO	0.776462	0.689948
476	O14657	TOR1B_HUMAN	No	_IYSDKGCK(de)TVQSR_	327	1	NO	NO	1.33757	0.658058
477	O14657	TOR1B_HUMAN	No	_KPITISIHGWAGTGK(de)NFVSQIVAENIHPK_	115	1	NO	NO	1.7029	0.378995
478	O14678	ABCD4_HUMAN	No	_ISEGQSIIITGNTGTGK(de)TSIIR_	427	1	NO	NO	1.6456	0.516098
480	O14683	P5I11_HUMAN	No	_SK(de)ISQVIGNEIK_	43	1	NO	NO	-1.31892	0.255842
482	O14737	PDCD5_HUMAN	No	_IAEIQAK(de)HGDPGDAAQQEAK_	20	1	NO	NO	-0.848804	0.466738
483	O14737	PDCD5_HUMAN	No	_TK(de)AVENYIIQMAR_	68	1	NO	NO	-0.512851	0.114078
484	O14737	PDCD5_HUMAN	No	_VSEQGIIEIIKK(de)_	98	1	NO	NO	-0.79346	0.181716
485	O14737	PDCD5_HUMAN	No	_VSQQTEK(de)TTTVK_	105	1	NO	NO	0.536945	0.16287
493	O14773	TPP1_HUMAN	No	_VNTEIMK(de)AAAR_	346	1	NO	NO	1.47895	0.379677
494	O14776	TCRG1_HUMAN	No	_ATFSEFAAK(de)HAK_	753	1	NO	NO	0.7818	0.170723
496	O14776	TCRG1_HUMAN	No	_EEAIQNFK(de)AIISDMVR_	904	1	NO	NO	-1.13364	0.594266
497	O14776	TCRG1_HUMAN	No	_K(de)QVFDQYVK_	703	1	NO	NO	2.1383	1.14562
498	O14776	TCRG1_HUMAN	No	_TIIK(de)ETK_	1024	1	NO	NO	-0.82051	0.215557
503	O14787	TNPO2_HUMAN	No	_SISGIIIK(de)NNVK_	71;81	2	NO	NO	0.455473	0.0994311
504	O14802	RPC1_HUMAN	No	_VNK(de)ANINFIR_	398	1	NO	NO	0.569741	0.112746
507	O14818	PSA7_HUMAN	No	_K(de)GSTAVGVR_	28	2	NO	NO	-0.0599704	0.0423199
508	O14818	PSA7_HUMAN	No	_IVIK(de)AIIEVVQSGGK_	193	1	NO	NO	-0.281881	0.481141
509	O14818	PSA7_HUMAN	No	_IYQTDPSGTYHAWK(de)ANAIGR_	157	2	NO	NO	-0.508053	0.126609
511	O14818	PSA7_HUMAN	No	_SVAK(de)IQDER_	52	2	NO	NO	-0.0136963	0.0253231
513	O14828	SCAM3_HUMAN	No	_KISPTEPK(de)NYGSYSTQASAAAATAEIIK_	81	1	NO	NO	-1.8622	0.534794
514	O14828	SCAM3_HUMAN	No	_K(de)QEEINR_	102	1	NO	NO	1.35175	0.49246
519	O14880	MGST3_HUMAN	No	_SGIGSGPK(de)CCH_	149	1	NO	NO	0.5904	0.61578
520	O14880	MGST3_HUMAN	No	_YK(de)VEYPIM(ox)YSTDPENGHIFNCIQR_	37	1	NO	NO	-0.25611	0.176205
522	O14908	GIPC1_HUMAN	No	_IIK(de)EIPR_	199	1	NO	NO	-0.247862	0.0754275
523	O14908	GIPC1_HUMAN	No	_K(de)AFDMISQR_	216	1	NO	NO	1.71117	1.08615
526	O14929	HAT1_HUMAN	No	_(ac)AGFGAMEK(de)FIVEYK_	9	1	NO	NO	-1.47444	0.787515
530	O14949	QCR8_HUMAN	No	_AYPHVFTK(de)GIPNVIR_	33	1	NO	NO	0.703244	0.72266
531	O14949	QCR8_HUMAN	No	_K(de)NPAAYENDK_	73	1	NO	NO	2.46328	0.877133
534	O14964	HGS_HUMAN	No	_ACGQIFCGK(de)CSSK_	192	1	NO	NO	0.248573	0.469555
535	O14964	HGS_HUMAN	No	_IQEQEK(de)ER_	541	1	NO	NO	-0.882586	0.300424
536	O14964	HGS_HUMAN	No	_QIQIAQK(de)IEIMR_	513	1	NO	NO	-1.3351	0.875728
537	O14964	HGS_HUMAN	No	_VNDK(de)NPHVAIYAIEVMESVVK_	56	1	NO	NO	-1.1083	0.427972
542	O14974	MYPT1_HUMAN	No	_HAK(de)SGGTAIHVAAAK_	197	1	NO	NO	-0.17463	0.042179
543	O14974	MYPT1_HUMAN	No	_SGGTAIHVAAAK(de)GYTEVIK_	209	1	NO	NO	1.81991	0.670767
544	O14974	MYPT1_HUMAN	No	_WIGSETDIEPPVVK(de)R_	30	1	NO	NO	0.0237219	0.00652367
545	O14979	HNRDL_HUMAN	No	_VAQPK(de)EVYR_	311	1	NO	NO	-0.158025	0.52344
546	O14979	HNRDL_HUMAN	No	_VIEIK(de)EHKIDGK_	209	1	NO	NO	0.266052	0.39648
547	O14979	HNRDL_HUMAN	No	_IIDPK(de)R_	221	1	NO	NO	2.22785	0.86761
548	O14979	HNRDL_HUMAN	No	_FGEVVDCTIK(de)TDPVTGR_	180	1	NO	NO	-0.0465905	0.0700115
551	O14979	HNRDL_HUMAN	No	_GFGFVIFK(de)DAASVDKVIEIK_	197	1	NO	NO	-1.10182	0.224791
552	O14979	HNRDL_HUMAN	No	_GK(de)EPPKK_	229	1	NO	NO	0.647642	0.143918
553	O14979	HNRDL_HUMAN	No	_K(de)VFVGGISPDTSEEQIKEYFGAFGEIENIEIPMDTK_	234	1	NO	NO	0.208727	0.150869
554	O14979	HNRDL_HUMAN	No	_INASK(de)NQQDDGK_	142	1	NO	NO	-1.08745	0.489404
555	O14979	HNRDL_HUMAN	No	_NQQDDGK(de)MFIGGISWDTSKK_	149	1	NO	NO	-0.185459	0.278569
556	O14979	HNRDL_HUMAN	No	_VFVGGISPDTSEEQIKEYFGAFGEIENIEIPMDTK(de)TNER_	269	1	NO	NO	-0.834517	0.202553
557	O14979	HNRDL_HUMAN	No	_YHQIGSGK(de)CEIK_	302	1	NO	NO	0.0890205	0.11602
558	O14980	XPO1_HUMAN	No	_ACK(de)AVGHPFVIQIGR_	700	1	NO	NO	-0.0166419	0.0296025
559	O14980	XPO1_HUMAN	No	_ETIK(de)IISGWVSR_	757	1	NO	NO	-0.595242	0.152933
564	O14980	XPO1_HUMAN	No	_IMTEK(de)IHNQVNGTEWSWK_	479	1	NO	NO	-0.442163	0.0942683
565	O14980	XPO1_HUMAN	No	_MAQEVITHIK(de)EHPDAWTR_	54	1	NO	NO	-0.674176	0.192541
566	O14980	XPO1_HUMAN	No	_NVDIIKDPETVK(de)QIGSIIK_	686	1	NO	NO	-1.21602	0.742807
567	O14980	XPO1_HUMAN	No	_QIGSIIK(de)TNVR_	693	1	NO	NO	2.22443	0.64563
568	O14980	XPO1_HUMAN	No	_QIIDFSQK(de)IDINIIDNVVNCIYHGEGAQQR_	22	1	NO	NO	-1.54558	0.758145
569	O14980	XPO1_HUMAN	No	_QIYIPMIFK(de)VR_	415	1	NO	NO	-0.143229	0.309203
570	O14980	XPO1_HUMAN	No	_YYGIQIIENVIK(de)TR_	88	1	NO	NO	-0.284061	0.438418
571	O14980	XPO1_HUMAN	No	_WK(de)IIPR_	92	1	NO	NO	-0.0200924	0.0449031
575	O15042	SR140_HUMAN	No	_GGVVNAAKEEHETDEK(de)R_	153	1	NO	NO	-1.45751	0.426328
577	O15042	SR140_HUMAN	No	_WK(de)IYSIIQGDSPTK_	476	1	NO	NO	-1.39453	0.944914
578	O15061	SYNEM_HUMAN	No	_AEVSPK(de)GIQTPVKDAGGGTGR_	594	1	NO	NO	-2.45185	1.28706
579	O15061	SYNEM_HUMAN	No	_GIQTPVK(de)DAGGGTGR_	601	1	NO	NO	-2.60526	1.42491
580	O15061	SYNEM_HUMAN	No	_DK(de)VAAGASESTR_	478	1	NO	NO	1.54335	0.482488
581	O15061	SYNEM_HUMAN	No	_EGQGGPGSVSVDVK(de)K_	987	1	NO	NO	-1.69767	0.724701
582	O15061	SYNEM_HUMAN	No	_RGFIGSGYSSSATTQQENSYGK(de)AVSSQTNVR_	417	1	NO	NO	-1.94493	0.734401
583	O15061	SYNEM_HUMAN	No	_GK(de)SAEQMIGDIINIGIK_	720	1	NO	NO	-0.695259	0.230254
584	O15061	SYNEM_HUMAN	No	_SAEQMIGDIINIGIK(de)GR_	735	1	NO	NO	-1.39805	0.505092
586	O15061	SYNEM_HUMAN	No	_HIK(de)IGPSEVWR_	1128	1	NO	NO	-0.778362	0.217391
589	O15061	SYNEM_HUMAN	No	_NK(de)SYHYTDSIIQR_	340	1	NO	NO	-0.602863	0.144338
590	O15061	SYNEM_HUMAN	No	_NTEAQVK(de)TFPDRPK_	443	1	NO	NO	-0.196301	0.0698044
591	O15061	SYNEM_HUMAN	No	_QFHAEK(de)EIIFQGPISAAGK_	1232	1	NO	NO	-3.06671	0.938596
592	O15061	SYNEM_HUMAN	No	_QFTQSPETEASADSFPDTK(de)VTYVDRK_	667	1	NO	NO	-1.58391	0.718708
594	O15061	SYNEM_HUMAN	No	_QK(de)APIASFNHSSAIYSNISGHR_	362	1	NO	NO	-1.93358	0.525245
595	O15061	SYNEM_HUMAN	No	_SGEFHAEPTVIEKEIK(de)IPHEFHTSMK_	928	1	NO	NO	-1.70946	0.724833
598	O15061	SYNEM_HUMAN	No	_TQK(de)DGAVGEK_	879	1	NO	NO	-1.59226	0.719206
599	O15061	SYNEM_HUMAN	No	_TVIIGK(de)K_	498	1	NO	NO	-0.716253	0.215644
600	O15061	SYNEM_HUMAN	No	_VVKPIDVPAPSIEGDIGSTHWK(de)EQAR_	908	1	NO	NO	-0.490165	0.0909221
601	O15061	SYNEM_HUMAN	No	_WEEITK(de)IDKEAR_	544	1	NO	NO	-2.24162	1.04684
603	O15067	PUR4_HUMAN	No	_EWIK(de)PIMFSGGIGSMEADHISK_	422	1	NO	NO	0.497112	0.115981
604	O15067	PUR4_HUMAN	No	_FCDNSSAIQGK(de)EVR_	279	1	NO	NO	1.09158	0.589335
605	O15067	PUR4_HUMAN	No	_HWFFK(de)GQIHVDGQK_	236	1	NO	NO	-1.3291	0.440986
607	O15078	CE290_HUMAN	No	_IK(de)ENIR_	1461	2	NO	NO	-1.1502	0.373911
609	O15143	ARC1B_HUMAN	No	_(ac)AYHSFIVEPISCHAWNK(de)DR_	18	1	NO	NO	-0.251413	0.0419901
611	O15143	ARC1B_HUMAN	No	_K(de)ASSEGGTAAGAGIDSIHK_	308	1	NO	NO	-0.348327	0.581361
612	O15143	ARC1B_HUMAN	No	_HIK(de)KPIR_	138;138	2	NO	NO	-2.4054	1.11238
613	O15143	ARC1B_HUMAN	No	_IFSAYIK(de)EVEERPAPTPWGSK_	174	1	NO	NO	-0.518568	0.10236
614	O15143	ARC1B_HUMAN	No	_NAYVWTIK(de)GR_	82	1	NO	NO	-1.03864	0.614653
617	O15143	ARC1B_HUMAN	No	_TQIAICPNNHEVHIYEK(de)SGAK_	37	1	NO	NO	0.361993	0.0757499
618	O15143	ARC1B_HUMAN	No	_TWK(de)PTIVIIR_	87	1	NO	NO	-0.222076	0.612632
620	O15143	ARC1B_HUMAN	No	_WTKVHEIK(de)EHNGQVTGIDWAPESNR_	49	1	NO	NO	0.0195602	0.020833
622	O15144	ARPC2_HUMAN	No	_AK(de)TSDFIK_	269	1	NO	NO	0.519883	0.677146
623	O15144	ARPC2_HUMAN	No	_TSDFIK(de)VINR_	275	1	NO	NO	0.926361	0.366634
626	O15144	ARPC2_HUMAN	No	_TITGK(de)TFSSR_	295	1	NO	NO	-0.80432	0.242377
627	O15144	ARPC2_HUMAN	No	_VFMQEFK(de)EGR_	186	1	NO	NO	0.341218	0.0841428
628	O15145	ARPC3_HUMAN	No	_PAYHSSIMDPDTK(de)IIGNMAIIPIR_	14	1	NO	NO	1.01622	0.525771
629	O15145	ARPC3_HUMAN	No	_SQFK(de)GPAPR_	29	1	NO	NO	-1.21432	0.276549
632	O15145	ARPC3_HUMAN	No	_WWTCFVK(de)R_	165	1	NO	NO	-0.560281	0.806248
634	O15169	AXIN1_HUMAN	No	_RIEEEEK(de)R_	719	1	NO	NO	-0.616251	0.158558
636	O15173	PGRC2_HUMAN	No	_IIIAVNGK(de)VFDVTK_	126	1	NO	NO	0.0067161	0.00213047
637	O15173	PGRC2_HUMAN	No	_VFDVTK(de)GSK_	132	1	NO	NO	0.942853	0.210009
639	O15212	PFD6_HUMAN	No	_IIGPVIVK(de)QEIGEAR_	66	1	NO	NO	-1.06818	0.4509
640	O15212	PFD6_HUMAN	No	_YQQIQK(de)DISK_	21	1	NO	NO	-2.03368	0.986875
641	O15212	PFD6_HUMAN	No	_K(de)IQGEVEK_	8	1	NO	NO	1.78182	0.647621
642	O15212	PFD6_HUMAN	No	_QK(de)IEAQITENNIVKEEIAIIDGSNVVFK_	32	1	NO	NO	0.277632	0.0562407
643	O15212	PFD6_HUMAN	No	_RIDYITAEIK(de)R_	88	1	NO	NO	0.923909	0.269598
644	O15235	RT12_HUMAN	No	_K(de)IGPTEGRPQIK_	48	1	NO	NO	-0.949083	0.404112
645	O15258	RER1_HUMAN	No	_(ac)SEGDSVGESVHGK(de)PSVVYR_	14	1	NO	NO	0.446586	0.787738
647	O15260	SURF4_HUMAN	No	_VTK(de)QYIPHVAR_	22	1	NO	NO	1.13005	0.549345
648	O15305	PMM2_HUMAN	No	_EMDDFIQK(de)IR_	34	1	NO	NO	1.30656	0.512923
654	O15347	HMGB3_HUMAN	No	_GKFDGAK(de)GPAK_	170	1	NO	NO	-0.351403	0.0964722
655	O15347	HMGB3_HUMAN	No	_GK(de)MSAYAFFVQTCR_	12	1	NO	NO	-0.904345	0.205882
656	O15347	HMGB3_HUMAN	No	_IK(de)EKYEK_	150;152;152	4	NO	NO	-0.355106	0.710691
657	O15347	HMGB3_HUMAN	No	_IK(de)STNPGISIGDVAKK_	112	1	NO	NO	0.134596	0.119841
658	O15347	HMGB3_HUMAN	No	_STNPGISIGDVAK(de)K_	125	1	NO	NO	-0.355334	0.0976198
659	O15347	HMGB3_HUMAN	No	_KK(de)DPNAPK_	88;90	2	NO	NO	0.558707	0.283129
662	O15355	PPM1G_HUMAN	No	_GK(de)QIIVANAGDSR_	339	1	NO	NO	0.176183	0.0409534
663	O15355	PPM1G_HUMAN	No	_IQK(de)AIEDAFIAIDAK_	92	1	NO	NO	-0.720613	0.138972
665	O15355	PPM1G_HUMAN	No	_NK(de)NIPPEEQMISAIPDIK_	409	1	NO	NO	0.532123	0.129978
666	O15355	PPM1G_HUMAN	No	_NTAEIQPESGK(de)R_	519	1	NO	NO	-0.449562	0.289438
668	O15371	EIF3D_HUMAN	No	_GAVIATEIK(de)NNSYK_	426	1	NO	NO	0.800304	0.264443
669	O15371	EIF3D_HUMAN	No	_NNSYK(de)IAR_	431	1	NO	NO	-0.822287	0.284306
670	O15371	EIF3D_HUMAN	No	_IAK(de)TQGNVFATDAIIATIMSCTR_	240	1	NO	NO	1.12453	0.361648
671	O15371	EIF3D_HUMAN	No	_IGK(de)VADWTGATYQDKR_	41	1	NO	NO	-1.11984	0.549292
672	O15371	EIF3D_HUMAN	No	_VADWTGATYQDK(de)R_	53	1	NO	NO	-0.12549	0.177535
673	O15371	EIF3D_HUMAN	No	_KFQK(de)QFGVR_	142	1	NO	NO	1.62094	0.56627
674	O15371	EIF3D_HUMAN	No	_NMIQFNIQIIPK(de)SAK_	124	1	NO	NO	-2.73742	0.93625
675	O15371	EIF3D_HUMAN	No	_SDWEVKEEMDFPQIMK(de)MR_	181	1	NO	NO	0.0778791	0.0157177
676	O15371	EIF3D_HUMAN	No	_SEK(de)PIR_	215	1	NO	NO	-0.666361	0.358397
677	O15371	EIF3D_HUMAN	No	_TQK(de)TAYQR_	90	1	NO	NO	0.0751609	0.0750126
678	O15371	EIF3D_HUMAN	No	_VGSK(de)IFFDKR_	275	1	NO	NO	-0.0857324	0.167347
679	O15371	EIF3D_HUMAN	No	_WK(de)IGDDIDIIVR_	364	1	NO	NO	-1.88522	0.674938
680	O15371	EIF3D_HUMAN	No	_YHVK(de)DSSR_	458	1	NO	NO	0.367006	0.312017
681	O15371	EIF3D_HUMAN	No	_YIEVSEPQDIECCGAIEYYDK(de)AFDR_	204	1	NO	NO	-0.421872	0.143663
682	O15371	EIF3D_HUMAN	No	_YTNK(de)YSSQFGGGSQYAYFHEEDESSFQIVDTAR_	58	1	NO	NO	-0.515556	0.153479
684	O15372	EIF3H_HUMAN	No	_K(de)ANITFEYMFEEVPIVIK_	189	1	NO	NO	0.587752	0.287619
685	O15372	EIF3H_HUMAN	No	_ITPK(de)IMEVCKEK_	172	1	NO	NO	-0.796532	0.190795
686	O15372	EIF3H_HUMAN	No	_K(de)EGTGSTATSSSSTAGAAGK_	5	1	NO	NO	-2.62326	0.958194
687	O15372	EIF3H_HUMAN	No	_MDSIIIAGQINTYCQNIK(de)EFTAQNIGK_	331	1	NO	NO	-1.37899	0.756821
688	O15372	EIF3H_HUMAN	No	_QQQQK(de)HQYQQR_	274	1	NO	NO	-1.67257	0.460064
689	O15372	EIF3H_HUMAN	No	_SAVADK(de)HEIISIASSNHIGK_	227	1	NO	NO	-1.39069	0.386177
691	O15382	BCAT2_HUMAN	No	_GK(de)DQQVR_	111	1	NO	NO	1.068	0.280657
693	O15382	BCAT2_HUMAN	No	_TITMK(de)QIIR_	321	1	NO	NO	0.146791	0.146802
694	O15400	STX7_HUMAN	No	_ISSNIQK(de)ITQCSVEIQR_	24	1	NO	NO	-1.28081	0.379721
695	O15400	STX7_HUMAN	No	_IVAEFTTSITNFQK(de)VQR_	106	1	NO	NO	-2.11418	0.771225
696	O15400	STX7_HUMAN	No	_QQIQQK(de)QQYTNQIAK_	55	1	NO	NO	-2.11979	0.771771
697	O15400	STX7_HUMAN	No	_QQYTNQIAK(de)ETDKYIK_	64	1	NO	NO	-2.39072	1.08274
700	O15438	MRP3_HUMAN	No	_TGAGK(de)SSMTICIFR_	1329	1	NO	NO	-1.95738	0.575664
704	O15460	P4HA2_HUMAN	No	_ATVRDPK(de)TGVITVASYR_	370	1	NO	NO	1.72945	0.600146
711	O15498	YKT6_HUMAN	No	_SEVIGTQSK(de)AFYK_	182	1	NO	NO	-0.409925	0.129617
712	O15498	YKT6_HUMAN	No	_VQAEIDETK(de)IIIHNTMESIIER_	150	1	NO	NO	-1.22946	0.381147
713	O15511	ARPC5_HUMAN	No	_AGSIVIK(de)VIISFK_	81	1	NO	NO	0.602798	0.216181
714	O15511	ARPC5_HUMAN	No	_VIISFK(de)ANDIEK_	87	1	NO	NO	0.241785	0.278621
715	O15511	ARPC5_HUMAN	No	_NGVDIIMK(de)YIYK_	108	1	NO	NO	-0.16269	0.255656
716	O15511	ARPC5_HUMAN	No	_YIYK(de)GFESPSDNSSAMIIQWHEK_	112	1	NO	NO	-0.00739929	0.00126411
717	O15511	ARPC5_HUMAN	No	_K(de)VDVDEYDENKFVDEEDGGDGQAGPDEGEVDSCIR_	13	1	NO	NO	0.295988	0.0608562
730	O15540	FABP7_HUMAN	No	_QVGNVTKPTVIISQEGDK(de)VVIR_	49	1	NO	NO	-0.501401	0.113134
732	O15540	FABP7_HUMAN	No	_(ac)VEAFCATWK(de)ITNSQNFDEYMK_	10	1	NO	NO	0.755533	0.241511
735	O43143	DHX15_HUMAN	No	_HQSFVIVGETGSGK(de)TTQIPQWCVEYMR_	166	1	NO	NO	-0.402813	0.945627
737	O43143	DHX15_HUMAN	No	_K(de)QNGAIGR_	408	1	NO	NO	-2.45475	0.597548
738	O43143	DHX15_HUMAN	No	_IIAK(de)IQSK_	786	1	NO	NO	-0.459039	0.212848
739	O43143	DHX15_HUMAN	No	_IQIPVWEYK(de)DRFTDIIVR_	143	1	NO	NO	-1.05939	0.317734
740	O43143	DHX15_HUMAN	No	_IRVESIIVTAISK(de)ASAQQR_	463	1	NO	NO	-0.0352078	0.00943348
742	O43143	DHX15_HUMAN	No	_K(de)AIVTGYFMQVAHIER_	691	1	NO	NO	-0.652653	1.14153
743	O43143	DHX15_HUMAN	No	_SNIGSVVIQIKK(de)_	516	1	NO	NO	-0.682979	0.165687
747	O43143	DHX15_HUMAN	No	_TIATDIIMGVIK(de)EVVR_	277	1	NO	NO	-1.5392	0.721962
748	O43143	DHX15_HUMAN	No	_TIIK(de)YMTDGMIIR_	234	1	NO	NO	-0.927437	0.258057
749	O43143	DHX15_HUMAN	No	_YYDIIK(de)K_	132	1	NO	NO	0.919548	0.177906
750	O43148	MCES_HUMAN	No	_INK(de)IVCTDIADVSVK_	222	1	NO	NO	-2.16571	0.55243
752	O43169	CYB5B_HUMAN	No	_NSIK(de)EIWIVIHGR_	35	1	NO	NO	-0.76468	0.178704
753	O43172	PRP4_HUMAN	No	_SK(de)EEYQQTWYHEGPNSIK_	159	1	NO	NO	-0.955473	0.27082
754	O43175	SERA_HUMAN	No	_AIVDHENVISCPHIGASTK(de)EAQSR_	289	1	NO	NO	0.849369	0.282439
755	O43175	SERA_HUMAN	No	_AWAGSPK(de)GTIQVITQGTSIK_	351	1	NO	NO	-1.73394	0.431908
756	O43175	SERA_HUMAN	No	_GTIQVITQGTSIK(de)NAGNCISPAVIVGIIK_	364	1	NO	NO	1.37788	0.297763
757	O43175	SERA_HUMAN	No	_CGEEIAVQFVDMVK(de)GK_	308	1	NO	NO	0.734983	0.204168
758	O43175	SERA_HUMAN	No	_GK(de)SITGVVNAQAITSAFSPHTKPWIGIAEAIGTIMR_	310	1	NO	NO	-1.39671	0.304956
759	O43175	SERA_HUMAN	No	_NAGNCISPAVIVGIIKEASK(de)_	384	1	NO	NO	0.207472	0.0378276
760	O43175	SERA_HUMAN	No	_QADVNIVNAK(de)IIVK_	394	1	NO	NO	1.38668	0.437065
761	O43175	SERA_HUMAN	No	_SITGVVNAQAITSAFSPHTK(de)PWIGIAEAIGTIMR_	330	1	NO	NO	-1.02641	0.2228
763	O43175	SERA_HUMAN	No	_K(de)GIIVMNTPNGNSISAAEITCGMIMCIAR_	91	1	NO	NO	-0.428245	0.0896919
764	O43175	SERA_HUMAN	No	_K(de)VIISDSIDPCCRK_	8	1	NO	NO	0.0310261	0.00785495
765	O43175	SERA_HUMAN	No	_QNISK(de)EEIIAEIQDCEGIIVR_	38	1	NO	NO	0.994428	0.209679
766	O43175	SERA_HUMAN	No	_SATK(de)VTADVINAAEKIQVVGR_	58	1	NO	NO	-0.0868799	0.0146644
767	O43175	SERA_HUMAN	No	_VTADVINAAEK(de)IQVVGR_	69	1	NO	NO	-0.834543	0.271659
770	O43181	NDUS4_HUMAN	No	_SK(de)SYGANFSWNKR_	158	1	NO	NO	-0.401566	0.332493
772	O43181	NDUS4_HUMAN	No	_WK(de)MEFDTR_	98	1	NO	NO	-1.68359	0.763374
777	O43237	DC1L2_HUMAN	No	_QQSIIAK(de)QPATPTR_	372	1	NO	NO	1.74026	0.874822
781	O43242	PSMD3_HUMAN	No	_QIEK(de)AVSGKEPR_	84	1	NO	NO	0.347863	0.257348
782	O43242	PSMD3_HUMAN	No	_HNVIK(de)TGVR_	404	1	NO	NO	-2.16953	1.10175
783	O43242	PSMD3_HUMAN	No	_IK(de)AIQIEYSEAR_	296	1	NO	NO	0.327012	0.0815202
784	O43242	PSMD3_HUMAN	No	_ISFCIDIHNMSVK(de)AMR_	492	1	NO	NO	0.337129	0.0808286
785	O43242	PSMD3_HUMAN	No	_NYIHYSIYDQAEK(de)IVSK_	269	1	NO	NO	0.819893	0.167987
786	O43242	PSMD3_HUMAN	No	_SYNK(de)DIESAEER_	503	1	NO	NO	-0.390226	0.10575
787	O43242	PSMD3_HUMAN	No	_VYEFIDK(de)IDVVR_	223	1	NO	NO	-1.69751	0.861528
789	O43252	PAPS1_HUMAN	No	_DVK(de)GIYKK_	171	1	NO	NO	-0.604288	0.1353
796	O43324	MCA3_HUMAN	No	_(ac)AAAAEISIIEK(de)SIGISK_	12	1	NO	NO	-0.177116	0.269777
799	O43390	HNRPR_HUMAN	No	_EFNEEGAISVIQQFK(de)ESDISHVQNK_	84	1	NO	NO	2.71218	0.951503
800	O43390	HNRPR_HUMAN	No	_ESDISHVQNK(de)SAFICGVMK_	94	1	NO	NO	1.03281	0.427015
801	O43390	HNRPR_HUMAN	No	_DIYEDEIVPIFEK(de)AGPIWDIR_	187	1	NO	NO	0.11445	0.0316986
802	O43390	HNRPR_HUMAN	No	_ICDSYEIRPGK(de)HIGVCISVANNR_	235	1	NO	NO	0.686974	1.19623
805	O43390	HNRPR_HUMAN	No	_SAFICGVMK(de)TYR_	103	1	NO	NO	0.159825	0.256401
806	O43390	HNRPR_HUMAN	No	_GFCFIEYEDHK(de)SAAQAR_	300	1	NO	NO	0.102067	0.0854092
807	O43390	HNRPR_HUMAN	No	_GYAFITFCGK(de)EAAQEAVK_	216	1	NO	NO	0.116971	0.0337089
808	O43390	HNRPR_HUMAN	No	_NK(de)TKENIIEEFSK_	257	1	NO	NO	0.946188	0.202694
810	O43390	HNRPR_HUMAN	No	_KADGYNQPDSK(de)R_	584;576	2	NO	NO	0.0787368	0.0482871
812	O43390	HNRPR_HUMAN	No	_YGGPPPDSVYSGVQPGIGTEVFVGK(de)IPR_	171	1	NO	NO	1.21474	0.576237
813	O43390	HNRPR_HUMAN	No	_NIATTVTEEIIEK(de)SFSEFGKIER_	359	1	NO	NO	0.00345683	0.000617434
814	O43390	HNRPR_HUMAN	No	_SFSEFGK(de)IER_	366	1	NO	NO	0.295128	0.0684622
815	O43390	HNRPR_HUMAN	No	_TK(de)ENIIEEFSK_	259	1	NO	NO	-0.783336	0.375075
816	O43390	HNRPR_HUMAN	No	_QGSK(de)VQESTKGPDEAK_	114	1	NO	NO	0.460609	0.260696
817	O43390	HNRPR_HUMAN	No	_VQESTKGPDEAK(de)IK_	126	1	NO	NO	1.91714	1.17416
823	O43395	PRPF3_HUMAN	No	_FK(de)QCPTENMAR_	649	1	NO	NO	-1.14737	0.848783
824	O43395	PRPF3_HUMAN	No	_FVDK(de)IFEAVEEGR_	65	1	NO	NO	-0.329344	0.718478
826	O43395	PRPF3_HUMAN	No	_TK(de)AQIEK_	345	1	NO	NO	1.24146	0.435337
827	O43396	TXNL1_HUMAN	No	_IAVVK(de)FTMR_	28	1	NO	NO	-0.277972	0.45665
828	O43399	TPD54_HUMAN	No	_HCGEIK(de)R_	78	1	NO	NO	2.3719	1.16356
829	O43399	TPD54_HUMAN	No	_RIGISTIGEIK(de)QNISR_	90	1	NO	NO	0.0233363	0.0360422
830	O43399	TPD54_HUMAN	No	_TQETISQAGQK(de)TSAAISTVGSAISR_	139	1	NO	NO	-0.716751	0.170511
832	O43399	TPD54_HUMAN	No	_VGTIK(de)SK_	175	1	NO	NO	1.73059	0.490827
833	O43399	TPD54_HUMAN	No	_QVIAAK(de)ER_	70	1	NO	NO	-0.411124	0.109314
834	O43414	ERI3_HUMAN	No	_VMIPGQCQYIGIPVADYFKQWINIKK(de)_	277	1	NO	NO	-0.355319	0.065353
835	O43432	IF4G3_HUMAN	No	_IITTIGKDIDFEK(de)_	944;950	2	NO	NO	1.18865	0.431756
836	O43432	IF4G3_HUMAN	No	_IK(de)MITEAIMHDCVVK_	903;909	2	NO	NO	1.25388	0.386331
837	O43432	IF4G3_HUMAN	No	_IIK(de)NHDEESIECICR_	919;925	2	NO	NO	-1.00457	0.622556
838	O43432	IF4G3_HUMAN	No	_K(de)IIINR_	835;841	2	NO	NO	0.0196015	0.0232434
839	O43432	IF4G3_HUMAN	No	_SIGNIK(de)FIGEIFK_	894;900	2	NO	NO	-0.978793	0.683133
840	O43447	PPIH_HUMAN	No	_K(de)IENVPTGPNNKPK_	153	1	NO	NO	0.0922393	0.0174066
841	O43488	ARK72_HUMAN	No	_SIK(de)PDSVR_	115	2	NO	NO	-0.0260577	0.0303548
842	O43488	ARK72_HUMAN	No	_FYAYNPIAGGIITGK(de)YK_	236	2	NO	NO	-1.87653	0.631784
844	O43491	E41L2_HUMAN	No	_AK(de)FITIGSK_	507	1	NO	NO	2.2611	0.636902
845	O43491	E41L2_HUMAN	No	_FITIGSK(de)FR_	514	1	NO	NO	0.283491	0.31231
847	O43491	E41L2_HUMAN	No	_EVQTNEIK(de)AEK_	203	1	NO	NO	-2.52773	1.26772
848	O43491	E41L2_HUMAN	No	_IIK(de)ISYK_	447	2	NO	NO	2.32912	1.04237
850	O43491	E41L2_HUMAN	No	_GISPAQADSQFIENAK(de)R_	399	1	NO	NO	0.382322	0.0811856
851	O43491	E41L2_HUMAN	No	_HQASISEIK(de)R_	652	1	NO	NO	0.632007	0.226697
852	O43491	E41L2_HUMAN	No	_IGVCANGIIIYK(de)DR_	432	1	NO	NO	1.84965	0.591576
855	O43491	E41L2_HUMAN	No	_NFMESTPEPRPNEWEK(de)R_	669	1	NO	NO	-2.63554	1.36615
856	O43491	E41L2_HUMAN	No	_NWIDPAKEIK(de)R_	280	1	NO	NO	0.646849	0.150834
857	O43491	E41L2_HUMAN	No	_QK(de)SYTIVVAK_	86	1	NO	NO	0.464601	0.679598
858	O43491	E41L2_HUMAN	No	_RIWK(de)VCVEHHTFYR_	486	1	NO	NO	0.924244	0.386476
859	O43491	E41L2_HUMAN	No	_SNFYIK(de)VRPAEIEQFESTIGFK_	458	1	NO	NO	0.278174	0.0569489
861	O43491	E41L2_HUMAN	No	_TVK(de)GGISETR_	946	1	NO	NO	0.700057	0.198987
862	O43491	E41L2_HUMAN	No	_TK(de)TVQCK_	216	1	NO	NO	0.994845	0.495729
866	O43491	E41L2_HUMAN	No	_VVVHK(de)ETEIAEEGED_	995	1	NO	NO	-0.930839	0.272213
867	O43505	B4GA1_HUMAN	No	_GFK(de)EAIK_	377	1	NO	NO	-0.274805	0.153653
871	O43592	XPOT_HUMAN	No	_VFK(de)NYIK_	950	1	NO	NO	-1.48559	0.693575
872	O43615	TIM44_HUMAN	No	_ESIHEVSK(de)SDIGR_	138	1	NO	NO	0.794439	0.214954
873	O43615	TIM44_HUMAN	No	_K(de)GFISGIIDNVKQEIAK_	57	1	NO	NO	-0.800842	0.482855
874	O43615	TIM44_HUMAN	No	_TAK(de)QSAESVSK_	157	1	NO	NO	-0.020568	0.00525848
876	O43615	TIM44_HUMAN	No	_WYQQWK(de)DFKENNVVFNR_	246	1	NO	NO	-0.853041	0.248481
877	O43615	TIM44_HUMAN	No	_YK(de)TIESETVR_	105	1	NO	NO	0.912987	0.27832
880	O43633	CHM2A_HUMAN	No	_K(de)FVIMR_	75	1	NO	NO	-2.47873	1.29595
881	O43660	PLRG1_HUMAN	No	_TK(de)ASVHTISGHTNAVATVR_	320	1	NO	NO	-0.555718	0.167011
882	O43665	RGS10_HUMAN	No	_FIK(de)SDIFIK_	140	1	NO	NO	0.284869	0.0924954
883	O43670	ZN207_HUMAN	No	_AQIPK(de)YQR_	381	1	NO	NO	0.651074	0.392835
884	O43670	ZN207_HUMAN	No	_IIIQHQK(de)AK_	31	1	NO	NO	0.584901	0.25317
885	O43670	ZN207_HUMAN	No	_HFK(de)CHICHK_	36	1	NO	NO	-1.83026	0.601788
886	O43670	ZN207_HUMAN	No	_IIEQK(de)TQESQK_	100	1	NO	NO	0.967891	0.288943
887	O43670	ZN207_HUMAN	No	_K(de)IYTGPGIAIHCMQVHK_	43	1	NO	NO	0.228024	0.262939
888	O43670	ZN207_HUMAN	No	_K(de)QIKPWCWYCNR_	7	1	NO	NO	-0.0128673	0.00323804
890	O43676	NDUB3_HUMAN	No	_IAAK(de)GIR_	39	1	NO	NO	-0.626972	0.201147
892	O43678	NDUA2_HUMAN	No	_ECSDVQPK(de)IWAR_	64	1	NO	NO	-0.188717	0.0465657
893	O43678	NDUA2_HUMAN	No	_GVGAK(de)IGIR_	13	1	NO	NO	1.63645	0.498093
895	O43681	ASNA_HUMAN	No	_IQAK(de)YIDQMEDIYEDFHIVKIPIIPHEVR_	301	1	NO	NO	-0.85327	0.495888
896	O43681	ASNA_HUMAN	No	_WIFVGGK(de)GGVGK_	45	1	NO	NO	-0.985957	0.197606
897	O43684	BUB3_HUMAN	No	_AFPNK(de)QGYVISSIEGR_	191	1	NO	NO	-0.48594	0.117988
902	O43684	BUB3_HUMAN	No	_YAFK(de)CHR_	222	1	NO	NO	0.146026	0.22862
903	O43707	ACTN4_HUMAN	No	_GVK(de)IVSIGAEEIVDGNAK_	125	2	NO	NO	-0.47504	0.103479
904	O43707	ACTN4_HUMAN	No	_ASFNHFDK(de)DHGGAIGPEEFK_	779	1	NO	NO	0.557904	1.49371
905	O43707	ACTN4_HUMAN	No	_CQK(de)ICDQWDAIGSITHSRR_	497	1	NO	NO	0.400528	0.743963
906	O43707	ACTN4_HUMAN	No	_DAK(de)GISQEQMQEFR_	760	1	NO	NO	1.91692	1.03923
907	O43707	ACTN4_HUMAN	No	_HRDYETATISDIK(de)AIIR_	450	1	NO	NO	0.0237985	0.00643935
909	O43707	ACTN4_HUMAN	No	_TEK(de)QIEAIDQIHIEYAKR_	521	1	NO	NO	3.23611	1.12535
910	O43707	ACTN4_HUMAN	No	_EAIIAIHK(de)EAQR_	592	1	NO	NO	0.610215	1.049
911	O43707	ACTN4_HUMAN	No	_ETTDTDTADQVIASFK(de)VIAGDKNFITAEEIR_	853	1	NO	NO	0.825183	1.84081
912	O43707	ACTN4_HUMAN	No	_VIAGDK(de)NFITAEEIRR_	859	1	NO	NO	0.986674	1.40854
913	O43707	ACTN4_HUMAN	No	_FAIQDISVEETSAK(de)EGIIIWCQR_	166;147	4	NO	NO	-1.52836	0.6287
914	O43707	ACTN4_HUMAN	No	_HRPEIIEYDK(de)IR_	214	1	NO	NO	2.08538	0.516604
915	O43707	ACTN4_HUMAN	No	_IAESNHIK(de)ISGSNPYTTVTPQIINSKWEK_	604	1	NO	NO	0.387791	0.762503
917	O43707	ACTN4_HUMAN	No	_WEK(de)VQQIVPK_	625	1	NO	NO	0.483752	0.111301
918	O43707	ACTN4_HUMAN	No	_ICK(de)VIAVNQENEHIMEDYEK_	283	1	NO	NO	-0.496598	0.112636
919	O43707	ACTN4_HUMAN	No	_IDHIAEK(de)FR_	417;398	2	NO	NO	0.480218	0.939902
920	O43707	ACTN4_HUMAN	No	_IMIIIEVISGERIPK(de)PER_	98	1	NO	NO	0.162174	0.166532
922	O43707	ACTN4_HUMAN	No	_ISNRPAFMPSEGK(de)MVSDINNGWQHIEQAEK_	378	1	NO	NO	-0.698499	0.307128
924	O43707	ACTN4_HUMAN	No	_K(de)AGTQIENIDEDFRDGIK_	66	1	NO	NO	0.509766	1.10891
925	O43707	ACTN4_HUMAN	No	_KDDPVTNINNAFEVAEK(de)YIDIPK_	233	1	NO	NO	0.656914	0.166651
926	O43707	ACTN4_HUMAN	No	_YIDIPK(de)MIDAEDIVNTARPDEK_	239	1	NO	NO	-0.660096	0.286588
927	O43707	ACTN4_HUMAN	No	_K(de)HEAFESDIAAHQDRVEQIAAIAQEINEIDYYDSHNVNTR_	455	1	NO	NO	1.69469	0.484257
928	O43707	ACTN4_HUMAN	No	_K(de)TAPYKNVNVQNFHISWK_	176	1	NO	NO	-0.293102	0.088797
929	O43707	ACTN4_HUMAN	No	_TAPYK(de)NVNVQNFHISWK_	181	1	NO	NO	0.110725	0.0797737
930	O43707	ACTN4_HUMAN	No	_K(de)TFTAWCNSHIR_	54;35	4	NO	NO	0.533576	0.93681
931	O43707	ACTN4_HUMAN	No	_RQFASQANVVGPWIQTK(de)MEEIGR_	668	1	NO	NO	-0.381649	0.145733
932	O43707	ACTN4_HUMAN	No	_QK(de)ASIHEAWTDGKEAMIK_	421	1	NO	NO	0.840315	2.11091
933	O43707	ACTN4_HUMAN	No	_SIVDYKPNIDIIEQQHQIIQEAIIFDNK(de)HTNYTMEHIR_	723	1	NO	NO	-0.422341	0.0682323
934	O43707	ACTN4_HUMAN	No	_TIPWIEDRVPQK(de)TIQEMQQK_	323	1	NO	NO	-1.63391	0.431272
935	O43707	ACTN4_HUMAN	No	_TIQEMQQK(de)IEDFRDYR_	331	1	NO	NO	1.68767	0.759057
936	O43707	ACTN4_HUMAN	No	_VHK(de)INNVNK_	108	1	NO	NO	0.619519	1.24338
937	O43707	ACTN4_HUMAN	No	_VHKPPK(de)VQEK_	346	1	NO	NO	0.87822	1.04347
938	O43707	ACTN4_HUMAN	No	_VQEK(de)CQIEINFNTIQTK_	350	1	NO	NO	0.375135	0.082579
940	O43719	HTSF1_HUMAN	No	_FGIIMRDPQTEEFK(de)VK_	169	1	NO	NO	-0.813663	0.267789
941	O43747	AP1G1_HUMAN	No	_AVEYNAIFK(de)K_	571	1	NO	NO	-0.916149	0.319461
942	O43747	AP1G1_HUMAN	No	_DIAGEVEK(de)IIK_	144	1	NO	NO	-0.411639	0.154956
946	O43765	SGTA_HUMAN	No	_AAAYSK(de)IGNYAGAVQDCER_	137	1	NO	NO	-0.375739	0.0785681
947	O43765	SGTA_HUMAN	No	_AICIDPAYSK(de)AYGR_	160	1	NO	NO	-2.72122	1.03497
951	O43768	ENSA_HUMAN	No	_AK(de)YPSIGQKPGGSDFIMK_	40	1	NO	NO	-2.13243	0.882712
952	O43768	ENSA_HUMAN	No	_YPSIGQKPGGSDFIMK(de)R_	56	1	NO	NO	-2.44469	1.20878
953	O43768	ENSA_HUMAN	No	_GQK(de)YFDSGDYNMAK_	63;58	2	NO	NO	-1.69755	0.724557
954	O43768	ENSA_HUMAN	No	_YFDSGDYNM(ox)AK(de)AK_	74;69	2	NO	NO	0.0277533	0.00563854
955	O43768	ENSA_HUMAN	No	_K(de)SSIVTSK_	107	1	NO	NO	-1.1115	0.854415
956	O43776	SYNC_HUMAN	No	_AIMTVGK(de)EPFPTIYVDSQKENER_	38	1	NO	NO	-1.75651	0.482935
957	O43776	SYNC_HUMAN	No	_CVK(de)IGAIEGYR_	116	1	NO	NO	-2.2403	1.10136
958	O43776	SYNC_HUMAN	No	_EQMK(de)SESR_	76	1	NO	NO	0.301925	0.0787448
959	O43776	SYNC_HUMAN	No	_FPVEIK(de)SFYMQR_	445	1	NO	NO	-1.37568	0.708436
960	O43776	SYNC_HUMAN	No	_GENMSK(de)IIK_	244	1	NO	NO	-1.40906	0.343925
962	O43776	SYNC_HUMAN	No	_IFDSEEIIAGYK(de)R_	490	1	NO	NO	-1.94639	1.01696
963	O43776	SYNC_HUMAN	No	_K(de)YGTCPHGGYGIGIER_	507	1	NO	NO	1.21045	0.252336
966	O43776	SYNC_HUMAN	No	_WNVISK(de)SQIK_	60	1	NO	NO	-2.11573	0.776029
967	O43795	MYO1B_HUMAN	No	_NIQTK(de)NPNYIR_	588	1	NO	NO	2.07058	0.875226
970	O43795	MYO1B_HUMAN	No	_IIIAEVVNK(de)INR_	995	1	NO	NO	0.352722	0.301219
971	O43795	MYO1B_HUMAN	No	_RPPTAGSQFK(de)ASVATIMK_	575	1	NO	NO	-0.120228	0.0249704
973	O43795	MYO1B_HUMAN	No	_IVQK(de)YFIEMK_	880	1	NO	NO	1.7264	0.686675
974	O43795	MYO1B_HUMAN	No	_K(de)IYEFTIQR_	868	1	NO	NO	1.17551	0.353274
976	O43795	MYO1B_HUMAN	No	_TIFK(de)IEDIRK_	695	1	NO	NO	0.933994	0.223343
977	O43809	CPSF5_HUMAN	No	_GVTQFGNK(de)YIQQTKPITIER_	23	1	NO	NO	0.0139507	0.0299519
978	O43809	CPSF5_HUMAN	No	_YIQQTK(de)PITIER_	29	1	NO	NO	0.128565	0.215915
980	O43809	CPSF5_HUMAN	No	_K(de)IFIVQIQEK_	173	1	NO	NO	-0.593841	0.307564
983	Q13033	STRN3_HUMAN	No	_MIEYAIK(de)QER_	126	3	NO	NO	-0.125856	0.040604
984	O43818	U3IP2_HUMAN	No	_IAK(de)IYIEQIR_	84	1	NO	NO	-0.661036	0.195999
987	O43837	IDH3B_HUMAN	No	_DMGGYSTTTDFIK(de)SVIGHIQTK_	374	1	NO	NO	-0.398744	0.141809
988	O43837	IDH3B_HUMAN	No	_SVIGHIQTK(de)GS_	383	1	NO	NO	-2.65753	1.26838
991	O43852	CALU_HUMAN	No	_DK(de)NRDGK_	243	1	NO	NO	2.28577	0.781391
992	O43852	CALU_HUMAN	No	_VHHEPQISDK(de)VHNDAQSFDYDHDAFIGAEEAK_	37	1	NO	NO	-1.56795	0.571803
993	O43852	CALU_HUMAN	No	_FK(de)M(ox)ADKDGDIIATK_	161	1	NO	NO	0.103344	0.0768484
994	O43852	CALU_HUMAN	No	_MADKDGDIIATK(de)EEFTAFIHPEEYDYMK_	173	1	NO	NO	-0.64147	0.120297
995	O43852	CALU_HUMAN	No	_HIVYESDQNKDGK(de)ITK_	284	1	NO	NO	0.467424	0.349721
996	O43852	CALU_HUMAN	No	_ITK(de)EEIVDKYDIFVGSQATDFGEAIVR_	287	1	NO	NO	1.26031	0.493883
997	O43852	CALU_HUMAN	No	_IGK(de)IVSK_	75	1	NO	NO	-0.206466	0.0958291
998	O43852	CALU_HUMAN	No	_IVSK(de)IDGDKDGFVTVDEIK_	79	1	NO	NO	-0.495483	0.0941114
999	O43852	CALU_HUMAN	No	_MDKEETK(de)DWIIPSDYDHAEAEAR_	255	1	NO	NO	0.0619991	0.0107643
1001	O43852	CALU_HUMAN	No	_TFDQITPEESK(de)ER_	70	1	NO	NO	-1.20167	0.34089
1002	O43854	EDIL3_HUMAN	No	_AIFGIQK(de)WYPYYAR_	188	1	NO	NO	1.50987	0.578388
1004	O43865	SAHH2_HUMAN	No	_ICVPAM(ox)NVNDSVTK(de)QKFDNIYCCR_	284	2	NO	NO	1.05504	0.393558
1005	O43865	SAHH2_HUMAN	No	_QK(de)FDNIYCCR_	286	2	NO	NO	1.01658	0.256002
1006	O43865	SAHH2_HUMAN	No	_IYQISK(de)AGK_	267	2	NO	NO	0.594646	0.126528
1007	O43920	NDUS5_HUMAN	No	_AEK(de)ECKIEYDDFVECIIR_	54	1	NO	NO	-1.22725	0.300029
1008	O43920	NDUS5_HUMAN	No	_DKIIK(de)EGK_	88	1	NO	NO	0.524817	0.12157
1009	O43920	NDUS5_HUMAN	No	_PFIDIQK(de)R_	8	1	NO	NO	0.427293	0.174616
1010	O43920	NDUS5_HUMAN	No	_WITIQSGEQPYK(de)MAGR_	28	1	NO	NO	-1.57485	0.468805
1012	O60216	RAD21_HUMAN	No	_IIK(de)IFTR_	387	1	NO	NO	-0.201796	0.504343
1013	O60216	RAD21_HUMAN	No	_K(de)IIVDSVKEIDSK_	323	1	NO	NO	0.240789	0.12387
1014	O60216	RAD21_HUMAN	No	_YIIADCNEAFIK(de)IK_	84	1	NO	NO	0.857435	0.263386
1015	O60220	TIM8A_HUMAN	No	_CMDKPGPK(de)IDSR_	54	1	NO	NO	0.206827	0.0445397
1017	O60264	SMCA5_HUMAN	No	_FDWFIK(de)SR_	990;1005	2	NO	NO	-0.427553	0.12783
1019	O60264	SMCA5_HUMAN	No	_IITQGFTNWNK(de)R_	847	1	NO	NO	-1.61369	0.509623
1021	O60264	SMCA5_HUMAN	No	_IYVGISK(de)MQR_	418	1	NO	NO	-1.02281	0.42136
1022	O60264	SMCA5_HUMAN	No	_K(de)ANYAVDAYFR_	739;754	2	NO	NO	2.03658	0.661378
1023	O60264	SMCA5_HUMAN	No	_SK(de)ISEIVR_	319;322	2	NO	NO	-0.00531809	0.00122099
1024	O60264	SMCA5_HUMAN	No	_STIHNWMSEFK(de)R_	249	1	NO	NO	-0.954839	0.387483
1025	O60264	SMCA5_HUMAN	No	_TIQTISIIGYMK(de)HYR_	223	1	NO	NO	-0.715262	0.199225
1033	O60306	AQR_HUMAN	No	_AGMQPGITMVVGPPGTGK(de)TDVAVQIISNIYHNFPEQR_	829	1	NO	NO	1.37615	0.412723
1036	O60313	OPA1_HUMAN	No	_IDQIQEEIIHTQIK(de)YQR_	228	1	NO	NO	-2.22601	0.772916
1039	O60313	OPA1_HUMAN	No	_WIYWK(de)NR_	779	1	NO	NO	-1.36001	0.520025
1046	O60469	DSCAM_HUMAN	No	_INGIIRK(de)_	1221	1	NO	NO	-0.338496	0.120498
1047	O60488	ACSL4_HUMAN	No	_IQAGEYVSIGK(de)VEAAIK_	587;596	2	NO	NO	-0.629938	0.14688
1050	O60488	ACSL4_HUMAN	No	_IK(de)DWQEGGYTINDKPNPR_	500	1	NO	NO	-0.420812	0.114954
1052	O60488	ACSL4_HUMAN	No	_KK(de)DIVK_	572;581	3	NO	NO	-2.11588	0.402364
1053	O60488	ACSL4_HUMAN	No	_VK(de)AIIGGNVR_	429	1	NO	NO	1.52962	0.480266
1054	O60493	SNX3_HUMAN	No	_KQGIEQFINK(de)VAGHPIAQNER_	128	1	NO	NO	-1.20531	0.31182
1055	O60493	SNX3_HUMAN	No	_SYTPSK(de)IR_	158	1	NO	NO	-0.71321	1.61625
1056	O60493	SNX3_HUMAN	No	_VVVPPIPGK(de)AFIR_	95	1	NO	NO	-0.201524	0.0574122
1058	O60506	HNRPQ_HUMAN	No	_EFNEDGAIAVIQQFK(de)DSDISHVQNK_	81	1	NO	NO	0.875336	0.177292
1059	O60506	HNRPQ_HUMAN	No	_DIEGENIEIVFAKPPDQK(de)R_	412	1	NO	NO	-1.26574	0.385842
1060	O60506	HNRPQ_HUMAN	No	_SAFICGVMK(de)TYR_	100	1	NO	NO	0.159825	0.256401
1061	O60506	HNRPQ_HUMAN	No	_GFCFIEYEDHK(de)TAAQAR_	297	1	NO	NO	0.0471833	0.115345
1062	O60506	HNRPQ_HUMAN	No	_GYAFVTFCTK(de)EAAQEAVK_	213	1	NO	NO	2.70357	0.914001
1063	O60506	HNRPQ_HUMAN	No	_VADSSKGPDEAKIK(de)_	125	2	NO	NO	0.155405	0.20213
1066	O60506	HNRPQ_HUMAN	No	_YGGPPPDSVYSGQQPSVGTEIFVGK(de)IPR_	168	1	NO	NO	0.839954	0.368721
1067	O60506	HNRPQ_HUMAN	No	_NIANTVTEEIIEK(de)AFSQFGKIER_	356	1	NO	NO	-0.527977	0.117321
1068	O60506	HNRPQ_HUMAN	No	_QGTK(de)VADSSKGPDEAK_	111	1	NO	NO	-0.489337	0.156747
1070	O60506	HNRPQ_HUMAN	No	_TK(de)EQIIEEFSK_	256	1	NO	NO	0.0975531	0.0225363
1071	O60506	HNRPQ_HUMAN	No	_VAEK(de)IDEIYVAGIVAHSDIDER_	42	1	NO	NO	-0.294872	0.0497733
1076	O60568	PLOD3_HUMAN	No	_DK(de)GIFIHISNQHEFGR_	500	1	NO	NO	-0.467372	0.0928413
1077	O60568	PLOD3_HUMAN	No	_ISINIDHK(de)SR_	215	1	NO	NO	-1.3061	0.456613
1078	O60568	PLOD3_HUMAN	No	_HGK(de)IWSNFWGAISPDEYYAR_	423	1	NO	NO	-1.18312	0.295839
1082	O60568	PLOD3_HUMAN	No	_TVGGGQK(de)VR_	89	1	NO	NO	-0.312126	0.260745
1083	O60568	PLOD3_HUMAN	No	_TYVGPMTESIFPGYHTK(de)AR_	645	1	NO	NO	-0.155672	0.0383175
1084	O60610	DIAP1_HUMAN	No	_K(de)IYKPEVQIR_	771	1	NO	NO	-0.157764	0.223038
1085	O60664	PLIN3_HUMAN	No	_VSGAQEMVSSAK(de)DTVATQISEAVDATR_	140	1	NO	NO	1.89876	0.734997
1087	O60664	PLIN3_HUMAN	No	_TK(de)SVVTGGVQSVMGSR_	166	1	NO	NO	1.56167	0.597644
1088	O60664	PLIN3_HUMAN	No	_IVEGQEK(de)IHQMWISWNQK_	296	1	NO	NO	0.518451	0.121165
1091	O60664	PLIN3_HUMAN	No	_VIADTK(de)EIVSSK_	122	1	NO	NO	0.241053	0.0532817
1093	O60673	DPOLZ_HUMAN	No	_K(de)PRTPR_	1582;452	2	NO	NO	-0.2245	0.220905
1097	O60701	UGDH_HUMAN	No	_IGNK(de)FIK_	264	1	NO	NO	-1.00454	0.212705
1100	O60701	UGDH_HUMAN	No	_IVTEK(de)STVPVR_	129	1	NO	NO	-1.4808	0.559721
1101	O60701	UGDH_HUMAN	No	_K(de)ICCIGAGYVGGPTCSVIAHMCPEIR_	6	1	NO	NO	0.121918	0.0273305
1102	O60701	UGDH_HUMAN	No	_MIK(de)PAFIFDGRR_	434	1	NO	NO	-0.173997	0.0584243
1109	O60733	PLPL9_HUMAN	No	_YGASPIHWAK(de)NAEMAR_	295	1	NO	NO	-0.272402	0.0475941
1112	O60749	SNX2_HUMAN	No	_TVK(de)HPTIIQDPDIR_	248	1	NO	NO	-1.77854	0.764103
1113	O60762	DPM1_HUMAN	No	_EVIEK(de)IIEK_	197	1	NO	NO	-0.981383	0.24401
1115	O60762	DPM1_HUMAN	No	_K(de)IGIGTAYIHGMK_	95	1	NO	NO	-1.32477	0.475979
1116	O60762	DPM1_HUMAN	No	_QK(de)EGNFDIVSGTR_	136	1	NO	NO	-0.859216	0.241338
1118	O60763	USO1_HUMAN	No	_DSEQVAEIKQEIATIK(de)SQINSQSVEITK_	798	1	NO	NO	-0.558167	0.153216
1120	O60763	USO1_HUMAN	No	_IGFISK(de)HEIYSR_	586	1	NO	NO	-0.142167	0.241248
1121	O60763	USO1_HUMAN	No	_IGK(de)ENFIEK_	574	1	NO	NO	0.654327	0.174891
1124	O60783	RT14_HUMAN	No	_K(de)MAYEYADER_	42	1	NO	NO	-0.516459	0.179033
1127	O60814	H2B1K_HUMAN	No	_KAVTK(de)AQK_	21;21;21;21;21;21;21	10	NO	NO	0.34591	0.456501
1128	O60814	H2B1K_HUMAN	No	_VIK(de)QVHPDTGISSK_	47;47;47;47;47;47;47	8	NO	NO	0.166144	0.177125
1129	O60814	H2B1K_HUMAN	No	_IAHYNK(de)R_	86;86;86;86;86;86;86;86;86;86	12	NO	NO	-0.427582	0.192972
1130	O60814	H2B1K_HUMAN	No	_IIIPGEIAK(de)HAVSEGTK_	109;109;109;109;109;109;109;110;109;109;109	12	NO	NO	0.286596	0.373044
1131	O60814	H2B1K_HUMAN	No	_SRK(de)ESYSVYVYK_	35;35;35;35;35;35;35	8	NO	NO	0.144166	0.120585
1132	O60814	H2B1K_HUMAN	No	_PEPAK(de)SAPAPK_	6;6	3	NO	NO	0.556956	1.06882
1133	O60814	H2B1K_HUMAN	No	_SAPAPK(de)KGSK_	12;12	3	NO	NO	0.583973	1.3621
1135	O60831	PRAF2_HUMAN	No	_NIK(de)NKIENK_	146;145	2	NO	NO	0.470982	0.118368
1136	O60832	DKC1_HUMAN	No	_AIETITGAIFQRPPIIAAVK(de)R_	191	1	NO	NO	0.353161	0.0683385
1138	O60832	DKC1_HUMAN	No	_IVMK(de)DSAVNAICYGAK_	302	1	NO	NO	-0.385865	0.0937496
1139	O60832	DKC1_HUMAN	No	_K(de)SIPEEDVAEIQHAEEFIIKPESK_	20	1	NO	NO	1.56502	0.427663
1140	O60832	DKC1_HUMAN	No	_SIPEEDVAEIQHAEEFIIK(de)PESK_	39	1	NO	NO	0.362469	0.0832649
1141	O60832	DKC1_HUMAN	No	_KWGIGPK(de)ASQK_	385	1	NO	NO	0.226344	0.0524328
1142	O60832	DKC1_HUMAN	No	_TGFINIDK(de)PSNPSSHEVVAWIR_	96	1	NO	NO	-1.6249	0.761569
1143	O60832	DKC1_HUMAN	No	_TTHYTPIACGSNPIK(de)R_	80	1	NO	NO	0.121901	0.13098
1144	O60832	DKC1_HUMAN	No	_VAK(de)IDTSQWPIIIK_	46	1	NO	NO	0.881837	0.252832
1145	O60832	DKC1_HUMAN	No	_VVYPIEK(de)IITSHKR_	291	1	NO	NO	-1.14213	0.47895
1149	O60841	IF2P_HUMAN	No	_IITK(de)SQR_	410	1	NO	NO	1.11136	0.366169
1150	O60841	IF2P_HUMAN	No	_IK(de)IIPQYIFNSRDPIVMGVTVEAGQVK_	1095	1	NO	NO	0.674198	0.212415
1151	O60841	IF2P_HUMAN	No	_QSIDAIK(de)DWFRDEMQK_	1195	1	NO	NO	-1.46818	0.515112
1152	O60841	IF2P_HUMAN	No	_SDWQIIVEIK(de)K_	1214	1	NO	NO	2.45845	0.630873
1154	O60841	IF2P_HUMAN	No	_VK(de)NQYEK_	916	1	NO	NO	0.267694	0.0971582
1155	O60861	GAS7_HUMAN	No	_EHK(de)TGNIRPVDMEI_	465	1	NO	NO	2.51162	0.928599
1156	O60861	GAS7_HUMAN	No	_FSAK(de)IHSEVEKPIMNFR_	295	1	NO	NO	0.0782768	0.0173168
1157	O60861	GAS7_HUMAN	No	_IHSEVEK(de)PIMNFR_	302	1	NO	NO	-1.08051	0.254813
1158	O60861	GAS7_HUMAN	No	_IKIEEDYAK(de)NIAK_	253	1	NO	NO	1.36116	0.691567
1159	O60861	GAS7_HUMAN	No	_ISNKTEEDIK(de)K_	370	1	NO	NO	1.04861	0.373195
1161	O60861	GAS7_HUMAN	No	_K(de)SIADEAEVHIK_	280	1	NO	NO	0.329791	0.0780665
1163	O60861	GAS7_HUMAN	No	_K(de)STQAGDDIMR_	375	1	NO	NO	-0.241537	0.0529644
1164	O60861	GAS7_HUMAN	No	_QMQK(de)EMSEFIR_	235	1	NO	NO	0.807372	0.223145
1166	O60861	GAS7_HUMAN	No	_YASVEK(de)AR_	338	1	NO	NO	0.0150687	0.00310485
1167	O60869	EDF1_HUMAN	No	_AIGIK(de)IR_	131	1	NO	NO	-0.0114604	0.00215531
1168	O60869	EDF1_HUMAN	No	_INEK(de)PQVIADYESGR_	102	1	NO	NO	-1.46516	0.457055
1169	O60869	EDF1_HUMAN	No	_GITQK(de)DIATK_	93	1	NO	NO	-1.55215	0.807507
1170	O60869	EDF1_HUMAN	No	_SK(de)QAIIAAQR_	25	1	NO	NO	-0.107313	0.0209756
1171	O60869	EDF1_HUMAN	No	_VTIEVGK(de)VIQQGR_	79	1	NO	NO	-0.180484	0.051513
1172	O60869	EDF1_HUMAN	No	_WAAGQNK(de)QHSITK_	50	1	NO	NO	1.07659	0.356416
1173	O60870	KIN17_HUMAN	No	_GIQK(de)IR_	23	1	NO	NO	0.0537506	0.0074104
1174	O60884	DNJA2_HUMAN	No	_IGIVEAICGFQFTFK(de)HIDGR_	287	1	NO	NO	-0.562185	0.1353
1175	O60884	DNJA2_HUMAN	No	_IIEVHVDKGMK(de)HGQR_	226	1	NO	NO	-0.0165788	0.00478293
1176	O60884	DNJA2_HUMAN	No	_NVICSACSGQGGK(de)SGAVQK_	152	1	NO	NO	-1.02974	0.34357
1178	O60884	DNJA2_HUMAN	No	_IYDIIGVPPGASENEIK(de)K_	25	1	NO	NO	1.52401	0.403511
1179	O60884	DNJA2_HUMAN	No	_NPFEK(de)GDIYIK_	326	1	NO	NO	0.116841	0.031479
1180	O60884	DNJA2_HUMAN	No	_SGAVQK(de)CSACR_	158	1	NO	NO	0.259846	0.0596131
1181	O60884	DNJA2_HUMAN	No	_TTK(de)IQISK_	134	1	NO	NO	0.405714	0.107825
1183	O60885	BRD4_HUMAN	No	_VVIK(de)TIWK_	72	1	NO	NO	0.887814	0.240544
1185	O60925	PFD1_HUMAN	No	_K(de)HAHITDTEIMTIVDETNMYEGVGR_	42	1	NO	NO	-1.26872	0.330153
1186	O60925	PFD1_HUMAN	No	_VK(de)IADIQIEQINR_	28	1	NO	NO	-1.44387	0.701827
1187	O60927	PP1RB_HUMAN	No	_SITIK(de)IR_	31	1	NO	NO	-0.872782	0.221777
1188	O75027	ABCB7_HUMAN	No	_VAIVGGSGSGK(de)STIVR_	511	1	NO	NO	0.311387	0.375868
1190	O75044	SRGP2_HUMAN	No	_AGASCPSGGHVADIYIANINK(de)QR_	836	1	NO	NO	-0.274667	0.0658742
1191	O75044	SRGP2_HUMAN	No	_K(de)GASIIIYQR_	751	1	NO	NO	-0.128771	0.0311011
1192	O75063	XYLK_HUMAN	No	_ADVGYK(de)GTQIK_	104	1	NO	NO	-0.068133	0.0167278
1193	O75063	XYLK_HUMAN	No	_GTQIK(de)AIIIIEGGQK_	109	1	NO	NO	0.819659	0.185357
1194	O75063	XYLK_HUMAN	No	_ETEPACADGDIMEGSVTIWIPDVWPIQK(de)HRHPWGR_	233	1	NO	NO	0.406699	0.206483
1195	O75063	XYLK_HUMAN	No	_HHYESFQDDEGASMIIIIDNAK(de)SFGNPSIDER_	312	1	NO	NO	1.03853	0.342704
1197	O75083	WDR1_HUMAN	No	_TGEK(de)VCAIGGSK_	223	1	NO	NO	0.234804	0.860591
1198	O75083	WDR1_HUMAN	No	_VCAIGGSK(de)AHDGGIYAISWSPDSTHIISASGDKTSK_	231	1	NO	NO	-1.56661	0.419053
1199	O75083	WDR1_HUMAN	No	_FK(de)FTIGDHSR_	182	1	NO	NO	-0.176838	0.0333122
1200	O75083	WDR1_HUMAN	No	_SIQCITVHK(de)NGGK_	330	1	NO	NO	0.370943	0.70963
1201	O75083	WDR1_HUMAN	No	_GVSK(de)IIGGDPK_	21	1	NO	NO	0.528264	1.20713
1202	O75083	WDR1_HUMAN	No	_IIGGDPK(de)GNNFIYTNGK_	28	1	NO	NO	0.17654	0.0372849
1204	O75083	WDR1_HUMAN	No	_K(de)CFSIDNPGYEPEVVAVHPGGDTVAIGGVDGNVR_	437	1	NO	NO	-0.553841	0.132385
1205	O75083	WDR1_HUMAN	No	_SYIYSGSHDGHINYWDSETGENDSFAGK(de)GHTNQVSR_	362	1	NO	NO	-0.034189	0.0325526
1208	O75083	WDR1_HUMAN	No	_PYEIK(de)K_	6	1	NO	NO	0.182678	0.0346685
1209	O75083	WDR1_HUMAN	No	_VINSVDIK(de)QSRPYR_	155	1	NO	NO	1.29048	0.625378
1210	O75083	WDR1_HUMAN	No	_VK(de)IQDAHR_	569	1	NO	NO	0.0831647	0.143247
1229	O75131	CPNE3_HUMAN	No	_SCIPQIK(de)IYGPTNFSPIINHVAR_	390	1	NO	NO	0.692126	0.147315
1230	O75131	CPNE3_HUMAN	No	_SSPVEFECINEK(de)KR_	253	1	NO	NO	2.34412	0.61274
1231	O75131	CPNE3_HUMAN	No	_SYK(de)NSGVISVK_	262	1	NO	NO	0.244572	0.604297
1232	O75131	CPNE3_HUMAN	No	_TEVVK(de)NNINPVWRPFK_	184	1	NO	NO	2.77637	0.750145
1234	O75147	OBSL1_HUMAN	No	_DRDGGFVIK(de)VIYCQAK_	305	1	NO	NO	-0.487697	0.121063
1236	O75155	CAND2_HUMAN	No	_IIEDK(de)NGEVQNIAVK_	60	1	NO	NO	-0.086844	0.0225964
1241	O75190	DNJB6_HUMAN	No	_SISTSTK(de)MVNGR_	196	1	NO	NO	0.112045	0.0333109
1242	O75223	GGCT_HUMAN	No	_VATQEGK(de)EITCR_	118	1	NO	NO	-1.31668	0.674287
1243	O75251	NDUS7_HUMAN	No	_AVAPK(de)PSSR_	55	1	NO	NO	2.18176	0.905535
1244	O75251	NDUS7_HUMAN	No	_K(de)VYDQMPEPR_	136	1	NO	NO	-0.823426	0.256375
1245	O75251	NDUS7_HUMAN	No	_QSDVMIVAGTITNK(de)MAPAIR_	129	1	NO	NO	-1.918	0.689522
1246	O75306	NDUS2_HUMAN	No	_MSK(de)GHMIADVVAIIGTQDIVFGEVDR_	440	1	NO	NO	-1.49287	0.755657
1247	O75306	NDUS2_HUMAN	No	_IK(de)APGFAHIAGIDK_	425	1	NO	NO	-2.09957	0.914366
1248	O75312	ZPR1_HUMAN	No	_IIITK(de)IPFFR_	66	1	NO	NO	-1.69102	0.694933
1249	O75323	NIPS2_HUMAN	No	_IRENK(de)EFIEFR_	148	1	NO	NO	-1.74022	0.594781
1250	O75323	NIPS2_HUMAN	No	_IQFHNVKPECIEAYNK(de)ICQEVIPK_	91	1	NO	NO	0.557538	0.130873
1251	O75323	NIPS2_HUMAN	No	_IMIPIK(de)TSPIQ_	281	1	NO	NO	0.0586184	0.0145275
1253	O75323	NIPS2_HUMAN	No	_K(de)ETSNIYK_	68	1	NO	NO	0.998184	0.249518
1254	O75323	NIPS2_HUMAN	No	_K(de)NQIIIEFSFWNEPVPR_	165	1	NO	NO	0.0200827	0.00665059
1256	O75323	NIPS2_HUMAN	No	_YEGGYPAITEVMNK(de)IR_	143	1	NO	NO	-2.16954	0.66134
1260	O75347	TBCA_HUMAN	No	_IIENEKDIEEAEEYK(de)EAR_	95	1	NO	NO	0.732926	0.143672
1261	O75347	TBCA_HUMAN	No	_IK(de)TGVVK_	12	1	NO	NO	-2.04345	0.869913
1262	O75348	VATG1_HUMAN	No	_AAEK(de)VSEAR_	21	1	NO	NO	0.3416	0.805763
1264	O75348	VATG1_HUMAN	No	_(ac)ASQSQGIQQIIQAEK(de)R_	16	2	NO	NO	-0.0567105	0.0143962
1266	O75348	VATG1_HUMAN	No	_IK(de)QAKEEAQAEIEQYR_	34	1	NO	NO	0.235098	0.213178
1267	O75348	VATG1_HUMAN	No	_QAK(de)EEAQAEIEQYR_	37	1	NO	NO	-0.92403	0.291228
1268	O75351	VPS4B_HUMAN	No	_GIIIFGPPGTGK(de)SYIAK_	180;173	2	NO	NO	0.317554	0.0868269
1270	O75356	ENTP5_HUMAN	No	_AIIFEVK(de)EIFRK_	149	1	NO	NO	-1.25264	0.554265
1271	O75356	ENTP5_HUMAN	No	_IYTHSYIGFGIK(de)AAR_	248	1	NO	NO	-2.32177	0.809577
1272	O75367	H2AY_HUMAN	No	_FVIHCNSPVWGADKCEEIIEK(de)TVK_	292	1	NO	NO	-0.92559	0.422016
1273	O75367	H2AY_HUMAN	No	_TVK(de)NCIAIADDKK_	295	1	NO	NO	-2.67704	0.86859
1276	O75367	H2AY_HUMAN	No	_K(de)GGKEFVEAVIEIR_	236	1	NO	NO	-1.44375	0.500178
1283	O75369	FLNB_HUMAN	No	_AFVGQK(de)SSFIVDCSK_	2530	1	NO	NO	1.4241	0.649469
1285	O75369	FLNB_HUMAN	No	_HVGNQQYNVTYVVK(de)ER_	2576	1	NO	NO	2.53894	1.40044
1288	O75369	FLNB_HUMAN	No	_AIVHDNK(de)DGTYAVTYIPDKTGR_	1572	1	NO	NO	3.32303	1.03872
1289	O75369	FLNB_HUMAN	No	_ASSDASK(de)VTSK_	2514	1	NO	NO	-0.0747852	0.0148997
1290	O75369	FLNB_HUMAN	No	_VTSK(de)GAGISK_	2518	1	NO	NO	2.08421	0.928562
1293	O75369	FLNB_HUMAN	No	_DAGEGIIAVQITDQEGKPK(de)R_	1564	1	NO	NO	-1.00174	0.212976
1297	O75369	FLNB_HUMAN	No	_FVPQEMGVHTVSVK(de)YR_	2170	1	NO	NO	0.405571	0.0836233
1300	O75369	FLNB_HUMAN	No	_GIEPTGNMVK(de)QPAK_	272	1	NO	NO	1.54665	0.546256
1302	O75369	FLNB_HUMAN	No	_GIQPK(de)GVR_	465;493;487	3	NO	NO	1.29571	1.20965
1304	O75369	FLNB_HUMAN	No	_IIAIIEVISQK(de)R_	60;80	2	NO	NO	2.1723	1.11439
1305	O75369	FLNB_HUMAN	No	_SPFTVGVAAPIDISKIK(de)_	948	1	NO	NO	0.847516	0.577485
1306	O75369	FLNB_HUMAN	No	_IK(de)VFGPGIEGK_	1232	1	NO	NO	-0.481817	0.103677
1309	O75369	FLNB_HUMAN	No	_K(de)VVPCIVTPVTGR_	987	1	NO	NO	0.441362	0.0872274
1311	O75369	FLNB_HUMAN	No	_PVTEK(de)DIAEDAPWKK_	6	1	NO	NO	2.0992	0.919029
1312	O75369	FLNB_HUMAN	No	_QMQIENVSVAIEFIDRESIK(de)IVSIDSK_	93;120	2	NO	NO	0.519433	0.111196
1314	O75369	FLNB_HUMAN	No	_SPFEVQVGPEAGMQK(de)VR_	551	1	NO	NO	3.20721	1.24699
1315	O75369	FLNB_HUMAN	No	_YADEEIPRSPFK(de)VK_	1508	1	NO	NO	0.301542	0.116425
1316	O75369	FLNB_HUMAN	No	_VHSPSGAVEECHVSEIEPDK(de)YAVR_	2342	1	NO	NO	1.42762	0.303144
1318	O75369	FLNB_HUMAN	No	_VK(de)AHGPGIEGGIVGKPAEFTIDTK_	1044	1	NO	NO	0.971927	0.182362
1319	O75369	FLNB_HUMAN	No	_VK(de)ESITR_	2096;2141	2	NO	NO	1.34814	2.01317
1320	O75369	FLNB_HUMAN	No	_VK(de)IAGPGIGSGVR_	1425	1	NO	NO	1.93295	0.724653
1321	O75369	FLNB_HUMAN	No	_VK(de)VDPSHDASK_	838	1	NO	NO	0.203047	0.0385078
1322	O75369	FLNB_HUMAN	No	_VK(de)VEPAVDTSR_	1221	1	NO	NO	1.44033	0.358694
1323	O75369	FLNB_HUMAN	No	_VNIGQGSHPQK(de)VK_	744	1	NO	NO	0.735385	0.218259
1324	O75369	FLNB_HUMAN	No	_VQAQGPGIK(de)EAFTNKPNVFTVVTR_	1339	1	NO	NO	1.64011	0.373393
1331	O75390	CISY_HUMAN	No	_AIGFPIERPK(de)SMSTEGIMK_	450	1	NO	NO	-0.0188513	0.00342788
1332	O75390	CISY_HUMAN	No	_SMSTEGIMK(de)FVDSK_	459	1	NO	NO	-0.0866941	0.232688
1333	O75390	CISY_HUMAN	No	_DIIADIIPK(de)EQAR_	43	1	NO	NO	-2.69823	1.23471
1334	O75390	CISY_HUMAN	No	_EFAIK(de)HIPNDPMFK_	366	1	NO	NO	-0.143948	0.489944
1335	O75390	CISY_HUMAN	No	_HIPNDPMFK(de)IVAQIYK_	375	1	NO	NO	-0.541669	0.144552
1336	O75390	CISY_HUMAN	No	_GFSIPECQK(de)IIPK_	103	1	NO	NO	-0.213202	0.691393
1338	O75390	CISY_HUMAN	No	_IVAQIYK(de)IVPNVIIEQGK_	382	1	NO	NO	-0.26289	0.910921
1339	O75390	CISY_HUMAN	No	_IPCVAAK(de)IYR_	215	1	NO	NO	-0.0977367	0.0293675
1340	O75390	CISY_HUMAN	No	_QQHGK(de)TVVGQITVDMMYGGMR_	57	1	NO	NO	-0.153272	0.0282067
1341	O75394	RM33_HUMAN	No	_MVSEAGTGFCFNTK(de)R_	33	1	NO	NO	0.845891	0.224988
1342	O75394	RM33_HUMAN	No	_SK(de)NIIVR_	14	1	NO	NO	0.134974	0.251955
1343	O75396	SC22B_HUMAN	No	_VADGIPIAASMQEDEQSGRDIQQYQSQAK(de)QIFR_	38	1	NO	NO	0.260347	0.239891
1344	O75396	SC22B_HUMAN	No	_GEAISAIDSK(de)ANNISSISKK_	169	1	NO	NO	-0.539857	0.140427
1345	O75396	SC22B_HUMAN	No	_K(de)INEQSPTR_	43	1	NO	NO	-0.8983	0.292367
1347	O75400	PR40A_HUMAN	No	_ESAFK(de)SMIK_	751	1	NO	NO	-1.43625	0.420253
1349	O75400	PR40A_HUMAN	No	_IAFNSIIEK(de)AEAR_	727	1	NO	NO	0.569623	0.210376
1350	O75400	PR40A_HUMAN	No	_KIIK(de)DIIK_	680	2	NO	NO	1.15866	0.386324
1352	O75400	PR40A_HUMAN	No	_SDSGKPYYYNSQTK(de)ESR_	205	1	NO	NO	0.325667	1.26156
1353	O75400	PR40A_HUMAN	No	_VQTEKEEK(de)EEAR_	453	1	NO	NO	-2.06062	0.664865
1354	O75410	TACC1_HUMAN	No	_IHAEEK(de)IDKANEEIAQVR_	740	1	NO	NO	-1.01537	0.330743
1357	O75438	NDUB1_HUMAN	No	_NK(de)SMIFK_	41	1	NO	NO	-1.51274	0.445972
1359	O75439	MPPB_HUMAN	No	_TIIGPTENIK(de)SISR_	219	1	NO	NO	-1.32139	0.74584
1361	O75475	PSIP1_HUMAN	No	_AVDITTPK(de)AAR_	143	1	NO	NO	-1.94033	0.699341
1362	O75475	PSIP1_HUMAN	No	_DFKPGDIIFAK(de)MK_	14	1	NO	NO	0.954418	0.202764
1363	O75475	PSIP1_HUMAN	No	_MK(de)GYPHWPAR_	16	1	NO	NO	0.215718	0.325944
1365	O75475	PSIP1_HUMAN	No	_NMFIVGEGDSVITQVINK(de)SIAEQR_	442	1	NO	NO	-1.85486	0.697263
1366	O75475	PSIP1_HUMAN	No	_FK(de)VSQVIMEK_	407	1	NO	NO	-2.94067	0.950468
1367	O75475	PSIP1_HUMAN	No	_GRPK(de)MVK_	198	1	NO	NO	-1.06493	0.427358
1368	O75475	PSIP1_HUMAN	No	_MVK(de)QPCPSESDIITEEDKSK_	201	1	NO	NO	-0.457059	0.108047
1373	O75475	PSIP1_HUMAN	No	_NMIK(de)GQHEKEAADR_	304	1	NO	NO	-0.847122	0.203847
1374	O75475	PSIP1_HUMAN	No	_STMIYNK(de)FK_	422	1	NO	NO	0.970585	0.244885
1377	O75477	ERLN1_HUMAN	No	_ITPEYIEIK(de)K_	284	1	NO	NO	0.491945	0.0980227
1378	O75477	ERLN1_HUMAN	No	_TK(de)IIIAAQK_	192	1	NO	NO	0.12474	0.146653
1379	O75477	ERLN1_HUMAN	No	_VVEK(de)EAETER_	205;205	2	NO	NO	1.29526	0.475648
1380	O75489	NDUS3_HUMAN	No	_K(de)DFPISGYVEIR_	200	1	NO	NO	-0.864864	0.271175
1381	O75489	NDUS3_HUMAN	No	_NDVAHK(de)QISAFGEYVAEIIPK_	56	1	NO	NO	-1.66374	0.603409
1382	O75489	NDUS3_HUMAN	No	_VK(de)TYTDEITPIESAVSVFK_	144	1	NO	NO	-0.0329779	0.00917188
1383	O75494	SRS10_HUMAN	No	_K(de)WICGR_	74	1	NO	NO	-0.857163	0.198098
1384	O75521	ECI2_HUMAN	No	_AK(de)WDAWNAIGSIPK_	92	1	NO	NO	-0.986997	0.27503
1385	O75521	ECI2_HUMAN	No	_ASQK(de)DFENSMNQVK_	41	1	NO	NO	0.69441	0.195953
1386	O75521	ECI2_HUMAN	No	_DFENSMNQVK(de)IIK_	51	1	NO	NO	1.25592	0.403316
1387	O75521	ECI2_HUMAN	No	_IK(de)IYAIYK_	64	1	NO	NO	1.56705	0.747756
1391	O75525	KHDR3_HUMAN	No	_DKAK(de)EEEIR_	108;208	4	NO	NO	-0.793357	0.403993
1392	O75525	KHDR3_HUMAN	No	_FNFVGK(de)IIGPR_	75	1	NO	NO	0.986862	0.392447
1393	O75525	KHDR3_HUMAN	No	_IQEETITK(de)MSIIGK_	94	1	NO	NO	1.00016	0.307497
1394	O75525	KHDR3_HUMAN	No	_MSIIGK(de)GSMR_	100	1	NO	NO	1.6735	0.461518
1395	O75525	KHDR3_HUMAN	No	_VIIPVK(de)QFPK_	65	1	NO	NO	-0.0862181	0.0211562
1398	O75531	BAF_HUMAN	No	_GFDK(de)AYVVIGQFIVIK_	41	1	NO	NO	1.00851	0.295108
1399	O75531	BAF_HUMAN	No	_K(de)DEDIFREWIK_	54	1	NO	NO	-0.292053	0.0827838
1400	O75533	SF3B1_HUMAN	No	_AFAVVASAIGIPSIIPFIK(de)AVCK_	649	1	NO	NO	-1.88821	0.74985
1401	O75533	SF3B1_HUMAN	No	_AGEIK(de)VVNGAAASQPPSKR_	182	1	NO	NO	-1.64682	0.876424
1402	O75533	SF3B1_HUMAN	No	_VVNGAAASQPPSK(de)R_	195	1	NO	NO	0.382947	0.615295
1403	O75533	SF3B1_HUMAN	No	_AIGPHDVIATIINNIK(de)VQER_	1102	1	NO	NO	0.0995834	0.132332
1404	O75533	SF3B1_HUMAN	No	_AK(de)GSETPGATPGSK_	240	1	NO	NO	-0.07282	0.0662936
1406	O75533	SF3B1_HUMAN	No	_TDRGGDSIGETPTPGASK(de)R_	333	1	NO	NO	-0.111419	0.0987016
1407	O75533	SF3B1_HUMAN	No	_GK(de)GIAAFIK_	741	1	NO	NO	0.0436415	0.0450303
1408	O75533	SF3B1_HUMAN	No	_HIIVK(de)VIDR_	554	1	NO	NO	-1.56646	0.784612
1409	O75533	SF3B1_HUMAN	No	_IADREDEYK(de)K_	120	1	NO	NO	-0.220766	0.0883635
1410	O75533	SF3B1_HUMAN	No	_IAK(de)THEDIEAQIR_	6	1	NO	NO	2.02764	0.544793
1411	O75533	SF3B1_HUMAN	No	_KIMK(de)IIIK_	499	1	NO	NO	0.268537	0.0635767
1412	O75533	SF3B1_HUMAN	No	_NRHEK(de)VQENCIDIVGR_	1030	1	NO	NO	0.24572	0.291726
1413	O75533	SF3B1_HUMAN	No	_K(de)ISSWDQAETPGHTPSIR_	214	1	NO	NO	0.157832	0.501198
1414	O75533	SF3B1_HUMAN	No	_K(de)ITATPTPIGGMTGFHMQTEDR_	430	1	NO	NO	-0.158832	0.029833
1415	O75533	SF3B1_HUMAN	No	_K(de)PGYHAPVAIINDIPQSTEQYDPFAEHRPPK_	81	1	NO	NO	-1.2584	0.528039
1417	O75533	SF3B1_HUMAN	No	_SIVEIIEHGIVDEQQK(de)VR_	700	1	NO	NO	-1.11467	0.754315
1421	O75534	CSDE1_HUMAN	No	_IK(de)QEIIPEER_	91	1	NO	NO	-0.527943	0.188411
1422	O75534	CSDE1_HUMAN	No	_IK(de)VDFVIPK_	288	1	NO	NO	0.117884	0.107339
1423	O75534	CSDE1_HUMAN	No	_SK(de)VTIIEGDHVR_	307	1	NO	NO	0.204086	0.0542252
1424	O75534	CSDE1_HUMAN	No	_TGK(de)CSACNVWR_	729	1	NO	NO	-0.829558	0.262459
1425	O75534	CSDE1_HUMAN	No	_TGKPIAVK(de)IVK_	86	1	NO	NO	0.376789	1.13116
1426	O75534	CSDE1_HUMAN	No	_VNK(de)THSVNGITEEADPTIYSGK_	581	1	NO	NO	-1.52875	0.522975
1427	O75558	STX11_HUMAN	No	_K(de)AVQYEEKNPCR_	265	1	NO	NO	2.42308	0.800296
1428	O75569	PRKRA_HUMAN	No	_IPEYTISQEGGPAHK(de)R_	156	1	NO	NO	0.557847	0.137538
1432	O75575	RPC9_HUMAN	No	_NK(de)HSSGQQNINTITYETIK_	34	1	NO	NO	-0.68746	0.277534
1436	O75608	LYPA1_HUMAN	No	_AIIDQEVK(de)NGIPSNR_	105	1	NO	NO	1.07839	0.453618
1440	O75643	U520_HUMAN	No	_AK(de)YAQDEHIITFFVPVFEPIPPQYFIR_	1244	1	NO	NO	0.837941	0.17964
1441	O75643	U520_HUMAN	No	_CVIMCQGSK(de)K_	1710	1	NO	NO	-0.56936	0.685635
1442	O75643	U520_HUMAN	No	_K(de)DFFKK_	1711	1	NO	NO	0.320207	0.210068
1443	O75643	U520_HUMAN	No	_MK(de)GYTIISEGIDEMVGIIYKPK_	85	1	NO	NO	-2.16697	0.830585
1450	O75643	U520_HUMAN	No	_K(de)PVIVFVPSRK_	1557	1	NO	NO	0.585698	0.193081
1451	O75643	U520_HUMAN	No	_IATYGITVAEITGDHQICK(de)EEISATQIIVCTPEKWDIITR_	577	1	NO	NO	-0.266981	0.133228
1452	O75643	U520_HUMAN	No	_IIGK(de)GNIIISTPEKWDIISR_	1421	1	NO	NO	-0.100823	0.0177855
1453	O75643	U520_HUMAN	No	_IMGK(de)MEADPEISK_	349	1	NO	NO	1.145	0.314169
1455	O75643	U520_HUMAN	No	_YAQAGFEGFK(de)TINR_	479	1	NO	NO	0.893934	0.293269
1456	O75643	U520_HUMAN	No	_IQSK(de)IYR_	487	1	NO	NO	0.136614	0.330975
1458	O75643	U520_HUMAN	No	_K(de)NFPFER_	1146	1	NO	NO	-0.830333	0.379773
1459	O75643	U520_HUMAN	No	_K(de)VVIITGETSTDIK_	1404	1	NO	NO	0.0451514	0.0760062
1460	O75643	U520_HUMAN	No	_MGK(de)TIHK_	1172	1	NO	NO	0.0949073	0.0235338
1461	O75643	U520_HUMAN	No	_QVIDIEDIVFTQGSHFMANK(de)R_	426	1	NO	NO	-0.12948	0.201294
1463	O75643	U520_HUMAN	No	_TINICK(de)MIDKR_	1116	1	NO	NO	0.112751	0.0994737
1464	O75648	MTU1_HUMAN	No	_TPNPDIVCNK(de)HIK_	103	1	NO	NO	0.261498	0.331926
1465	O75648	MTU1_HUMAN	No	_IIQAADSFK(de)DQTFFISQVSQDAIRR_	171	1	NO	NO	-1.32422	0.36534
1467	O75663	TIPRL_HUMAN	No	_DFCFGPWK(de)ITASK_	19	1	NO	NO	0.759597	0.240577
1469	O75683	SURF6_HUMAN	No	_(ac)ASIIAK(de)DAYIQSIAK_	7	1	NO	NO	-0.137609	0.0374104
1474	O75718	CRTAP_HUMAN	No	_CK(de)QGIPAFR_	123	1	NO	NO	0.907738	0.607983
1476	O75746	CMC1_HUMAN	No	_GIIPQIIGVAPEK(de)AIK_	403;405	2	NO	NO	-1.37657	0.698555
1477	O75746	CMC1_HUMAN	No	_K(de)IYSTIAGTR_	234;235	2	NO	NO	-1.16099	0.350523
1479	O75794	CD123_HUMAN	No	_K(de)WCEIIPGAEFR_	168	1	NO	NO	-1.09311	0.495699
1480	O75821	EIF3G_HUMAN	No	_CPYK(de)DTIGPMQK_	172	1	NO	NO	-0.792217	0.279699
1482	O75821	EIF3G_HUMAN	No	_TTGQSK(de)GFAFISFHR_	280	1	NO	NO	0.0728729	0.0783174
1486	O75821	EIF3G_HUMAN	No	_GQK(de)IVSCR_	153	1	NO	NO	0.178015	0.125261
1487	O75821	EIF3G_HUMAN	No	_ICK(de)GDHWTTR_	161	1	NO	NO	0.888567	0.285668
1489	O75821	EIF3G_HUMAN	No	_PTGDFDSK(de)PSWADQVEEEGEDDKCVTSEIIK_	9	1	NO	NO	-0.11256	0.232455
1490	O75821	EIF3G_HUMAN	No	_TGK(de)YVPPSIR_	212	1	NO	NO	0.112523	0.183323
1492	O75822	EIF3J_HUMAN	No	_ITNSITVICSEK(de)QKQEK_	210	1	NO	NO	-0.793413	0.241458
1493	O75822	EIF3J_HUMAN	No	_K(de)GVVPGGGIK_	224	1	NO	NO	1.07127	0.552309
1494	O75822	EIF3J_HUMAN	No	_VITPEEQIADK(de)IR_	117	1	NO	NO	-1.24136	0.313343
1496	O75832	PSD10_HUMAN	No	_GGIGIIIK(de)R_	221	1	NO	NO	0.601835	0.30634
1497	O75844	FACE1_HUMAN	No	_AK(de)DIYSAIIK_	429	1	NO	NO	0.027204	0.00861865
1498	O75844	FACE1_HUMAN	No	_IQAIK(de)TMK_	470	1	NO	NO	1.56254	0.698181
1499	O75844	FACE1_HUMAN	No	_IYK(de)TTTHVPPEIGQIMDSETFEK_	46	1	NO	NO	-0.64646	0.152254
1501	O75874	IDHC_HUMAN	No	_DATNDQVTK(de)DAAEAIKK_	58	1	NO	NO	0.412328	0.101579
1502	O75874	IDHC_HUMAN	No	_EAIICK(de)NIPR_	115	1	NO	NO	0.487088	0.121075
1504	O75874	IDHC_HUMAN	No	_NTIIK(de)K_	217	1	NO	NO	2.76933	1.0904
1505	O75874	IDHC_HUMAN	No	_IIDDMVAQAMK(de)SEGGFIWACK_	260	1	NO	NO	0.0461679	0.051118
1506	O75874	IDHC_HUMAN	No	_SDYINTFEFMDKIGENIKIK(de)_	408	1	NO	NO	0.396222	0.0960965
1507	O75874	IDHC_HUMAN	No	_IVSGWVK(de)PIIIGR_	126	1	NO	NO	-0.173495	0.228392
1508	O75874	IDHC_HUMAN	No	_K(de)ISGGSVVEMQGDEMTR_	4	1	NO	NO	0.810068	0.208797
1509	O75874	IDHC_HUMAN	No	_SIEDFAHSSFQMAISK(de)GWPIYISTK_	203	1	NO	NO	-0.620758	0.171598
1510	O75879	GATB_HUMAN	No	_IK(de)QIQIEQDSGK_	186	1	NO	NO	-0.203196	0.0404383
1511	O75880	SCO1_HUMAN	No	_HIGK(de)PIIGGPFSITTHTGER_	133	1	NO	NO	-2.54679	0.990657
1512	O75880	SCO1_HUMAN	No	_K(de)GEIAASIATHMRPYR_	283	1	NO	NO	-0.97147	0.238658
1514	O75915	PRAF3_HUMAN	No	_ITDYISK(de)VKE_	185	1	NO	NO	0.726092	0.165438
1515	O75915	PRAF3_HUMAN	No	_NKIENK(de)MEGIGIK_	151	1	NO	NO	0.497628	0.131716
1517	O75934	SPF27_HUMAN	No	_K(de)HIQDINWQR_	158	1	NO	NO	0.967948	0.234733
1519	O75937	DNJC8_HUMAN	No	_AYK(de)IIIDQEQK_	108	1	NO	NO	1.85204	0.558565
1521	O75937	DNJC8_HUMAN	No	_EYVEHTVK(de)ER_	135	1	NO	NO	-0.217218	0.202546
1522	O75937	DNJC8_HUMAN	No	_DSVITSK(de)NQIER_	40	1	NO	NO	1.55779	0.520076
1523	O75937	DNJC8_HUMAN	No	_EAK(de)EMHER_	183	1	NO	NO	-1.28523	0.742688
1524	O75937	DNJC8_HUMAN	No	_QAVYK(de)QTMK_	164	1	NO	NO	-1.669	0.766225
1527	O75937	DNJC8_HUMAN	No	_K(de)EGKPTIVEEDDPEIFK_	143	1	NO	NO	0.852687	0.20445
1528	O75937	DNJC8_HUMAN	No	_NFQANTK(de)GKK_	231	1	NO	NO	-1.71277	0.517241
1529	O75937	DNJC8_HUMAN	No	_QTMK(de)IFAEIEIK_	168	1	NO	NO	-0.731172	0.21375
1531	O75940	SPF30_HUMAN	No	_K(de)EMIAQQR_	143	1	NO	NO	-1.03199	0.428275
1532	O75947	ATP5H_HUMAN	No	_AIASSIK(de)SWNETITSR_	32	1	NO	NO	0.091053	0.133362
1533	O75947	ATP5H_HUMAN	No	_IAAIPENPPAIDWAYYK(de)ANVAK_	58	1	NO	NO	-0.24431	0.260654
1535	O75947	ATP5H_HUMAN	No	_IVEYEK(de)EMEKMK_	117	1	NO	NO	0.246403	0.0980914
1536	O75947	ATP5H_HUMAN	No	_MK(de)NIIPFDQMTIEDINEAFPETK_	123	1	NO	NO	-1.85229	0.500659
1538	O75947	ATP5H_HUMAN	No	_K(de)YPYWPHQPIENI_	149	1	NO	NO	-1.57764	0.389034
1543	O75955	FLOT1_HUMAN	No	_ITGVSISQVNHK(de)PIR_	422	1	NO	NO	0.379743	0.116493
1545	O75955	FLOT1_HUMAN	No	_TK(de)QQIEEQR_	246	1	NO	NO	-1.82541	0.792426
1546	O75964	ATP5L_HUMAN	No	_AIQSIK(de)K_	54	2	NO	NO	0.497015	0.108459
1547	O75964	ATP5L_HUMAN	No	_IVNSAQTGSFK(de)QITVK_	66	1	NO	NO	-0.2288	0.366292
1548	O75964	ATP5L_HUMAN	No	_NIVEK(de)TPAIVNAAVTYSKPR_	11	1	NO	NO	2.18369	1.35225
1551	O76003	GLRX3_HUMAN	No	_K(de)ITHAAPCMIFMK_	139	1	NO	NO	-1.51463	0.498617
1553	O76021	RL1D1_HUMAN	No	_K(de)TPANEKVEIQK_	374	1	NO	NO	-0.581108	0.22653
1554	O76021	RL1D1_HUMAN	No	_KAVDAIITHCK(de)SR_	48	1	NO	NO	0.205361	0.258401
1555	O76021	RL1D1_HUMAN	No	_FFTTPSK(de)SVR_	468	1	NO	NO	0.0221205	0.0242698
1556	O76021	RL1D1_HUMAN	No	_GISEK(de)IPEKWESVK_	240	1	NO	NO	-2.43247	0.66392
1559	O76021	RL1D1_HUMAN	No	_IIFVK(de)TEK_	254	1	NO	NO	-1.35108	0.597952
1560	O76021	RL1D1_HUMAN	No	_TEK(de)SAAIPIFSSFVSNWDEATKR_	257	1	NO	NO	-1.53213	0.3933
1561	O76021	RL1D1_HUMAN	No	_IINK(de)HGIK_	120	1	NO	NO	-0.441449	0.634681
1562	O76021	RL1D1_HUMAN	No	_IK(de)EEAVK_	435	1	NO	NO	-0.227238	0.0644714
1563	O76021	RL1D1_HUMAN	No	_K(de)AIPASETPK_	408	1	NO	NO	-0.319171	0.05794
1564	O76021	RL1D1_HUMAN	No	_KASHTPK(de)K_	478	1	NO	NO	-1.90004	1.06351
1565	O76021	RL1D1_HUMAN	No	_K(de)EQTPEHGKK_	337	1	NO	NO	0.204888	0.0950686
1567	O76021	RL1D1_HUMAN	No	_KVPVSVNIISK(de)NISR_	188	1	NO	NO	0.208484	0.256376
1568	O76021	RL1D1_HUMAN	No	_KQIDK(de)EQVR_	33	1	NO	NO	-1.29372	0.81651
1569	O76021	RL1D1_HUMAN	No	_SPAK(de)SPNPSTPR_	395	1	NO	NO	-0.930187	0.323239
1570	O76021	RL1D1_HUMAN	No	_TPANEK(de)VEIQK_	380	1	NO	NO	-1.95469	0.968372
1571	O76021	RL1D1_HUMAN	No	_SDSEDICIFTK(de)DEPNSTPEKTEQFYR_	100	1	NO	NO	-0.89052	0.177124
1572	O76021	RL1D1_HUMAN	No	_SYEAK(de)IR_	145	1	NO	NO	-0.0744903	0.0991729
1573	O76024	WFS1_HUMAN	No	_ASSEFK(de)SVIISIR_	811	1	NO	NO	2.3108	1.15803
1574	O76024	WFS1_HUMAN	No	_IGSK(de)WPVFEIK_	836	1	NO	NO	0.354601	0.459089
1575	O76031	CLPX_HUMAN	No	_SNIIIIGPTGSGK(de)TIIAQTIAK_	299	1	NO	NO	-0.23472	0.0492916
1579	O76094	SRP72_HUMAN	No	_ITMAQIK(de)ISQGNISK_	383	1	NO	NO	1.69519	0.491307
1580	O76094	SRP72_HUMAN	No	_K(de)QIQAIEFNK_	301	1	NO	NO	0.0413703	0.0085329
1581	O76094	SRP72_HUMAN	No	_VIANNSISFEK(de)AYCEYR_	84	1	NO	NO	-0.564607	0.156081
1582	O94766	B3GA3_HUMAN	No	_MK(de)QEEQIQR_	317	1	NO	NO	-0.471123	0.159944
1583	O94776	MTA2_HUMAN	No	_IPIATIVK(de)DIVAQAPIKPK_	522	1	NO	NO	-0.151802	0.0598508
1585	O94776	MTA2_HUMAN	No	_YGK(de)DFNDIRQDFIPWK_	285;288	2	NO	NO	-1.62337	0.446056
1600	O94808	GFPT2_HUMAN	No	_IK(de)EITYMHSEGIIAGEIK_	561	1	NO	NO	-0.10725	0.0201987
1601	O94808	GFPT2_HUMAN	No	_TCTIENVK(de)NICK_	232	1	NO	NO	0.307159	0.0638023
1602	O94808	GFPT2_HUMAN	No	_VIFIEDDDIAAVADGK(de)ISIHR_	289	1	NO	NO	0.0473703	0.010785
1603	O94826	TOM70_HUMAN	No	_AAAFEQIQK(de)WK_	168	1	NO	NO	0.604464	0.134537
1604	O94826	TOM70_HUMAN	No	_WK(de)EVAQDCTK_	170	1	NO	NO	-0.232444	0.0798852
1605	O94826	TOM70_HUMAN	No	_AIDMFNK(de)AINIAK_	570	1	NO	NO	-0.814887	0.194139
1607	O94826	TOM70_HUMAN	No	_AVEINPK(de)YVK_	185	1	NO	NO	-1.07401	0.258445
1608	O94826	TOM70_HUMAN	No	_YVK(de)AIFR_	188	1	NO	NO	1.25698	0.250149
1609	O94826	TOM70_HUMAN	No	_IRPESAIAQAQK(de)CFAIYR_	441	1	NO	NO	1.01529	0.226691
1611	O94826	TOM70_HUMAN	No	_YFK(de)AGKYEQAIQCYTEAISICPTEK_	126	1	NO	NO	-1.14275	0.21937
1613	O94826	TOM70_HUMAN	No	_YK(de)NREPIMPSPQFIK_	245	1	NO	NO	2.4977	1.01505
1616	O94832	MYO1D_HUMAN	No	_TK(de)IFIR_	678;677	2	NO	NO	0.206063	0.0547843
1617	O94851	MICA2_HUMAN	No	_AIWYK(de)IDKR_	68	1	NO	NO	1.2506	0.31098
1624	O94875	SRBS2_HUMAN	No	_VGIFPISYVEK(de)ITPPEK_	919	1	NO	NO	1.38179	0.482545
1625	O94875	SRBS2_HUMAN	No	_VIIIK(de)R_	969	1	NO	NO	0.635954	0.194963
1626	O94875	SRBS2_HUMAN	No	_VTVIK(de)APHYPGIGPVDESGIPTAIR_	68	1	NO	NO	2.32552	0.986248
1627	O94901	SUN1_HUMAN	No	_EITTIIQK(de)IQAR_	419	1	NO	NO	0.881041	0.300093
1629	O94903	PROSC_HUMAN	No	_WHFIGHIQK(de)QNVNK_	99	1	NO	NO	0.532065	0.114304
1630	O94905	ERLN2_HUMAN	No	_IAEANK(de)IK_	273	1	NO	NO	0.357871	0.107235
1632	O94905	ERLN2_HUMAN	No	_YK(de)AIASNSK_	287	1	NO	NO	-0.103135	0.0186928
1633	O94905	ERLN2_HUMAN	No	_TK(de)IIIAAQK_	192	1	NO	NO	0.12474	0.146653
1634	O94905	ERLN2_HUMAN	No	_VTK(de)PNIPEAIRR_	172	1	NO	NO	1.22475	0.765149
1636	O94906	PRP6_HUMAN	No	_SK(de)WIAGDVPAAR_	618	1	NO	NO	2.29257	1.04116
1637	O94906	PRP6_HUMAN	No	_AIIEK(de)SR_	768	1	NO	NO	2.55439	0.779684
1638	O94906	PRP6_HUMAN	No	_HYEDFPK(de)IWMMK_	710	1	NO	NO	-1.59811	0.477637
1639	O94906	PRP6_HUMAN	No	_IEEVTGK(de)IQVAR_	324	1	NO	NO	-0.198517	0.0523462
1640	O94906	PRP6_HUMAN	No	_IIIK(de)SVR_	299	1	NO	NO	0.0647829	0.0183546
1643	O94906	PRP6_HUMAN	No	_K(de)CPHSTPIWIIISR_	738	1	NO	NO	-0.45642	0.118428
1644	O94906	PRP6_HUMAN	No	_K(de)SVWIR_	574	1	NO	NO	-0.634705	0.213299
1645	O94906	PRP6_HUMAN	No	_VFM(ox)K(de)SVKIEWVQDNIR_	680	1	NO	NO	1.13712	0.281561
1646	O94906	PRP6_HUMAN	No	_YEK(de)ITPVPDSFFAK_	178	1	NO	NO	-1.19408	0.333005
1647	O94919	ENDD1_HUMAN	No	_K(de)IIEVVNQIQDEER_	281	1	NO	NO	1.31699	0.495717
1648	O94919	ENDD1_HUMAN	No	_MVQSQK(de)SSSPISSTR_	300	1	NO	NO	0.202551	0.0649278
1649	O94919	ENDD1_HUMAN	No	_VVAK(de)VIR_	407	1	NO	NO	-0.182051	0.425553
1652	O94925	GLSK_HUMAN	No	_FNK(de)IFINEDDKPHNPMVNAGAIVVTSIIK_	320	1	NO	NO	0.472817	0.356383
1657	O94925	GLSK_HUMAN	No	_IK(de)QGIIPSIEDIIFYTIAEGQEKIPVHK_	132	1	NO	NO	-0.0457926	0.010969
1658	O94925	GLSK_HUMAN	No	_IPVHK(de)FITAIK_	158	1	NO	NO	0.963646	0.433568
1660	O94925	GLSK_HUMAN	No	_K(de)CVQSNIVIITQAFR_	202	1	NO	NO	0.0493594	0.0112297
1662	O94925	GLSK_HUMAN	No	_VADYIPQIAK(de)FSPDIWGVSVCTVDGQR_	255	1	NO	NO	0.0867525	0.0194852
1663	O94925	GLSK_HUMAN	No	_YVGK(de)EPSGIR_	311	1	NO	NO	0.207576	0.0419022
1665	O94979	SC31A_HUMAN	No	_IIAGDKEVVIAQNDK(de)HTGPVR_	120	1	NO	NO	0.880964	0.357805
1668	O94979	SC31A_HUMAN	No	_KPIPDEHIIIK(de)TTFEDIIQR_	1120	1	NO	NO	0.300344	0.0737566
1669	O94979	SC31A_HUMAN	No	_RPVGASFSFGGK(de)IVTFENVR_	403	1	NO	NO	0.086972	0.0195105
1670	O95070	YIF1A_HUMAN	No	_(ac)AYHSGYGAHGSK(de)HR_	13	1	NO	NO	1.66176	0.639406
1675	O95136	S1PR2_HUMAN	No	_VK(de)IYGSDK_	138	1	NO	NO	-0.650356	0.151023
1677	O95139	NDUB6_HUMAN	No	_TGYTPDEK(de)IR_	9	1	NO	NO	-1.32001	0.601208
1681	O95182	NDUA7_HUMAN	No	_K(de)AVTPAPPIKR_	93	1	NO	NO	-0.921564	0.32152
1683	O95182	NDUA7_HUMAN	No	_TQPPPKIPVGPSHK(de)ISNNYYCTR_	48	1	NO	NO	-0.316965	0.0677687
1684	O95182	NDUA7_HUMAN	No	_YQEISK(de)R_	33	1	NO	NO	0.911818	0.416947
1690	O95202	LETM1_HUMAN	No	_IIWIDTK(de)IAAR_	176	1	NO	NO	-1.32287	0.743925
1693	O95202	LETM1_HUMAN	No	_TGEEK(de)YVEESK_	597	1	NO	NO	-0.757053	0.32183
1695	O95202	LETM1_HUMAN	No	_VIDEIK(de)HYYHGFR_	162	1	NO	NO	-0.498963	0.143757
1696	O95202	LETM1_HUMAN	No	_VK(de)IEIAK_	257	1	NO	NO	-1.19419	0.659336
1698	O95218	ZRAB2_HUMAN	No	_GK(de)AVGPASIIK_	137	1	NO	NO	-0.369716	0.0846746
1699	O95218	ZRAB2_HUMAN	No	_VSDGDWICPDKK(de)CGNVNFAR_	19	1	NO	NO	1.43324	0.312447
1700	O95292	VAPB_HUMAN	No	_(ac)AK(de)VEQVISIEPQHEIK_	3	1	NO	NO	0.202668	0.0437743
1703	O95292	VAPB_HUMAN	No	_FRGPFTDVVTTNIK(de)IGNPTDR_	31	1	NO	NO	-2.80933	0.942409
1704	O95292	VAPB_HUMAN	No	_HK(de)FMVQSMFAPTDTSDMEAVWK_	87	1	NO	NO	-1.94563	0.745739
1705	O95292	VAPB_HUMAN	No	_IISTTASK(de)TETPIVSK_	147	1	NO	NO	1.64002	0.810584
1706	O95292	VAPB_HUMAN	No	_TETPIVSK(de)SISSSIDDTEVKK_	155	1	NO	NO	-1.01422	0.334813
1707	O95292	VAPB_HUMAN	No	_NVCFK(de)VK_	43	1	NO	NO	0.454218	0.0879025
1708	O95292	VAPB_HUMAN	No	_VK(de)TTAPR_	45	1	NO	NO	-0.275336	0.0756344
1709	O95298	NDUC2_HUMAN	No	_TYGEIFEK(de)FHPIR_	114	1	NO	NO	0.438226	0.084344
1712	O95299	NDUAA_HUMAN	No	_K(de)GDPHEMK_	221	1	NO	NO	-2.13192	0.66373
1713	O95299	NDUAA_HUMAN	No	_K(de)VVEDIEYIK_	268	1	NO	NO	0.355723	0.0768634
1714	O95299	NDUAA_HUMAN	No	_VVEDIEYIK(de)FDKGPWIK_	277	1	NO	NO	-1.92083	1.03073
1717	O95302	FKBP9_HUMAN	No	_DSISIENK(de)VVPENCER_	265	1	NO	NO	1.62137	1.10947
1719	O95302	FKBP9_HUMAN	No	_GIIGMCVGEK(de)R_	218	1	NO	NO	1.63938	0.553458
1720	O95302	FKBP9_HUMAN	No	_GK(de)IAPGFDAEIIVK_	527	2	NO	NO	2.90875	0.913575
1721	O95302	FKBP9_HUMAN	No	_IAPGFDAEIIVK(de)NMFTNQDR_	539	2	NO	NO	-0.0414227	0.00957717
1722	O95302	FKBP9_HUMAN	No	_IK(de)DQEAKHDEI_	561	1	NO	NO	1.58737	0.786887
1725	O95319	CELF2_HUMAN	No	_IK(de)VQIK_	495;473	6	NO	NO	-0.624136	0.160414
1726	O95319	CELF2_HUMAN	No	_SK(de)NDSKPY_	502;480	2	NO	NO	0.573114	0.138795
1727	O95319	CELF2_HUMAN	No	_SQNPPQSK(de)GCCFVTFYTR_	83;59	2	NO	NO	-2.22097	0.659975
1728	O95319	CELF2_HUMAN	No	_VFIDK(de)QTNISK_	458;436	2	NO	NO	-0.0815993	0.0161968
1730	O95336	6PGL_HUMAN	No	_IVAPISDSPK(de)PPPQR_	180	1	NO	NO	1.74958	0.709094
1733	O95340	PAPS2_HUMAN	No	_DVK(de)GIYKR_	161	1	NO	NO	1.06103	0.616038
1736	O95340	PAPS2_HUMAN	No	_K(de)DIYEPTHGGK_	524	1	NO	NO	1.07627	0.451734
1738	O95340	PAPS2_HUMAN	No	_TENQQK(de)STNVVYQAHHVSR_	14	1	NO	NO	1.72636	0.97725
1739	O95347	SMC2_HUMAN	No	_IK(de)HAQQEIK_	424	1	NO	NO	-1.03074	0.385326
1740	O95347	SMC2_HUMAN	No	_SQAASIITK(de)FQEIKDVQDEIR_	677	1	NO	NO	-1.56557	0.503308
1741	O95347	SMC2_HUMAN	No	_TK(de)FVDGVSTVAR_	1160	1	NO	NO	-1.14343	0.308533
1743	O95347	SMC2_HUMAN	No	_VNTK(de)SQSAFDIK_	312	1	NO	NO	0.343461	0.093063
1744	O95352	ATG7_HUMAN	No	_FIIITFADIK(de)K_	140	1	NO	NO	1.95561	0.69225
1745	O95352	ATG7_HUMAN	No	_QPIYEFEDCIGGGKPK(de)AIAAADR_	413	1	NO	NO	-2.25649	0.531441
1747	O95372	LYPA2_HUMAN	No	_FGAITAEK(de)IR_	190	1	NO	NO	-2.13681	0.822257
1749	O95373	IPO7_HUMAN	No	_DGAIHMIGSIAEIIIK(de)K_	445	1	NO	NO	-0.659118	0.224999
1751	O95373	IPO7_HUMAN	No	_K(de)VITGVAGEDAECHAAK_	724	1	NO	NO	-0.298681	0.0763365
1752	O95373	IPO7_HUMAN	No	_MIEK(de)HGGYK_	1013	1	NO	NO	1.21182	0.370256
1755	O95394	AGM1_HUMAN	No	_GK(de)INHICGADFVK_	244	1	NO	NO	2.23864	0.877436
1759	O95433	AHSA1_HUMAN	No	_IPTCK(de)ITIK_	208	1	NO	NO	0.509373	0.18195
1760	O95433	AHSA1_HUMAN	No	_ITIK(de)ETFITSPEEIYR_	212	1	NO	NO	-0.18756	0.0641981
1761	O95433	AHSA1_HUMAN	No	_K(de)AKPAPSK_	187	1	NO	NO	-1.22265	0.273133
1762	O95433	AHSA1_HUMAN	No	_YYFEGIK(de)QTFGYGAR_	328	1	NO	NO	-1.1238	0.313411
1764	O95453	PARN_HUMAN	No	_SK(de)IIEPFFNK_	413	1	NO	NO	-0.185103	0.0387072
1766	O95478	NSA2_HUMAN	No	_AQGETEVIK(de)VIR_	134	1	NO	NO	-0.265298	0.068713
1769	O95479	G6PE_HUMAN	No	_VDHYIGK(de)QAVAQIIPFR_	208	1	NO	NO	0.0624771	0.0566092
1772	O95573	ACSL3_HUMAN	No	_AK(de)PVNSKPDSAYR_	58	1	NO	NO	-0.346505	0.289391
1773	O95573	ACSL3_HUMAN	No	_ASMENQPHSK(de)PIPSDIAVIMYTSGSTGIPK_	275	1	NO	NO	-0.458632	0.0941872
1774	O95573	ACSL3_HUMAN	No	_EIIQTK(de)IK_	220	1	NO	NO	-0.997959	0.34482
1775	O95573	ACSL3_HUMAN	No	_IK(de)DIVSIVPR_	222	1	NO	NO	-0.689835	0.21653
1776	O95573	ACSL3_HUMAN	No	_EIK(de)THYQADIER_	706	1	NO	NO	-2.46737	1.11052
1779	O95573	ACSL3_HUMAN	No	_VISEAAISASIEKFEIPVK(de)IR_	679	1	NO	NO	-0.513242	0.408206
1782	O95573	ACSL3_HUMAN	No	_GSK(de)GDTSMIKPTIMAAVPEIMDR_	369	1	NO	NO	-1.98208	0.769987
1784	O95573	ACSL3_HUMAN	No	_IGYSSPQTIADQSSK(de)IK_	363	1	NO	NO	-0.258953	0.0644486
1785	O95573	ACSL3_HUMAN	No	_VGAPIVCCEIKIK(de)_	509	1	NO	NO	-1.38157	1.02301
1786	O95573	ACSL3_HUMAN	No	_NWEEGGYFNTDK(de)PHPR_	521	1	NO	NO	-1.8572	0.752874
1787	O95573	ACSL3_HUMAN	No	_IYK(de)NVMNK_	392	1	NO	NO	-1.32474	0.291911
1788	O95573	ACSL3_HUMAN	No	_(ac)MNNHVSSKPSTMK(de)IK_	13	1	NO	NO	-0.138598	0.0301323
1791	O95573	ACSL3_HUMAN	No	_WICTGDIGEFEPDGCIK(de)IIDR_	575	1	NO	NO	-2.87017	1.03394
1792	O95602	RPA1_HUMAN	No	_ITGK(de)AWVK_	714	1	NO	NO	-0.859886	0.375345
1795	O95639	CPSF4_HUMAN	No	_TVVCK(de)HWIR_	69	1	NO	NO	-0.0147764	0.00343965
1796	O95671	ASML_HUMAN	No	_APDVVIGADTIVTVGGIIIEK(de)PVDKQDAYR_	100	1	NO	NO	0.433026	0.0973983
1804	O95758	PTBP3_HUMAN	No	_FFQK(de)DRK_	510	1	NO	NO	2.90786	0.958136
1805	O95758	PTBP3_HUMAN	No	_FK(de)KPGSK_	460;439	3	NO	NO	0.210592	0.29627
1806	O95758	PTBP3_HUMAN	No	_IDFSK(de)ITSINVK_	257;259	2	NO	NO	-0.0412922	0.0868229
1807	O95758	PTBP3_HUMAN	No	_ITSINVK(de)YNNDKSR_	264;266	2	NO	NO	0.163318	0.30347
1809	O95758	PTBP3_HUMAN	No	_YNNDK(de)SR_	269;271	3	NO	NO	-0.106984	0.076942
1810	O95758	PTBP3_HUMAN	No	_VTNIIM(ox)IK(de)GK_	92	2	NO	NO	0.968144	0.257549
1813	O95782	AP2A1_HUMAN	No	_INK(de)EIANIR_	35	2	NO	NO	1.88491	0.911555
1814	O95782	AP2A1_HUMAN	No	_K(de)VQHSNAK_	299	2	NO	NO	0.811914	0.886906
1815	O95782	AP2A1_HUMAN	No	_SK(de)FKGDK_	43	2	NO	NO	-1.55945	0.408277
1816	O95782	AP2A1_HUMAN	No	_TSVQFQNFSPTVVHPGDIQTQIAVQTK(de)R_	810	1	NO	NO	0.337311	0.0731769
1819	O95782	AP2A1_HUMAN	No	_WK(de)QISIPQQEAQK_	880	1	NO	NO	0.402675	0.152743
1821	O95786	DDX58_HUMAN	No	_QFSSFEK(de)R_	858	1	NO	NO	-1.29111	0.334417
1825	O95793	STAU1_HUMAN	No	_K(de)NAAIAVIEEIK_	239	1	NO	NO	0.0423153	0.0474594
1827	O95793	STAU1_HUMAN	No	_K(de)VTFFEPGSGDENGTSNKEDEFR_	382	1	NO	NO	0.223763	0.0562305
1831	O95793	STAU1_HUMAN	No	_TK(de)PIVKPQTSPEYGQGINPISR_	270	1	NO	NO	0.437115	0.800595
1833	O95810	SDPR_HUMAN	No	_ISK(de)YQASTSNTVSK_	102	1	NO	NO	0.441721	0.119861
1834	O95810	SDPR_HUMAN	No	_YQASTSNTVSK(de)IIEK_	113	1	NO	NO	1.47871	0.574706
1835	O95816	BAG2_HUMAN	No	_IIDEVVNK(de)FIDDIGNAK_	123	1	NO	NO	1.22472	0.335811
1836	O95816	BAG2_HUMAN	No	_INAK(de)ANEGR_	9	1	NO	NO	0.789963	0.304052
1837	O95816	BAG2_HUMAN	No	_NIENSDKAIK(de)IIEHSK_	189	1	NO	NO	1.82323	0.553854
1838	O95816	BAG2_HUMAN	No	_SHIMSIYSACSSEVPHGPVDQK(de)FQSIVIGCAIEDQKK_	154	1	NO	NO	2.26928	0.585889
1840	O95817	BAG3_HUMAN	No	_K(de)VQTIIEKIEQK_	486	1	NO	NO	0.829371	0.269154
1845	O95831	AIFM1_HUMAN	No	_AGAEVK(de)SR_	278	1	NO	NO	1.47072	0.572895
1847	O95831	AIFM1_HUMAN	No	_GNMGK(de)IIPEYISNWTMEK_	342	1	NO	NO	-2.18715	0.794853
1849	O95831	AIFM1_HUMAN	No	_ISGIGITPEQKQK(de)_	111	1	NO	NO	-0.581487	0.143607
1850	O95831	AIFM1_HUMAN	No	_K(de)IIKDGEQHEDINEVAK_	590	1	NO	NO	0.814205	0.410875
1851	O95831	AIFM1_HUMAN	No	_K(de)VETDHIVAAVGIEPNVEIAK_	388	1	NO	NO	-1.57479	0.482
1854	O95861	BPNT1_HUMAN	No	_VGGAGNK(de)IIQIIEGK_	224	1	NO	NO	-0.44909	0.147255
1855	O95881	TXD12_HUMAN	No	_EAAASGIPIMVIIHK(de)SWCGACK_	63	1	NO	NO	2.15922	0.723595
1856	O95881	TXD12_HUMAN	No	_SWCGACK(de)AIKPK_	70	1	NO	NO	-0.255618	0.0768025
1859	O95983	MBD3_HUMAN	No	_QTASIFK(de)QPVTK_	109	2	NO	NO	0.793142	0.333265
1860	O96000	NDUBA_HUMAN	No	_CIAK(de)QR_	152	1	NO	NO	-0.225349	0.0533862
1862	O96000	NDUBA_HUMAN	No	_EVEQFTQVAK(de)AYQDRYQDIGAYSSAR_	131	1	NO	NO	-0.561644	0.110838
1863	O96000	NDUBA_HUMAN	No	_PDSWDK(de)DVYPEPPR_	7	1	NO	NO	-0.155949	0.0341365
1864	O96000	NDUBA_HUMAN	No	_QHAK(de)NR_	52	1	NO	NO	-2.03413	0.736958
1867	O96008	TOM40_HUMAN	No	_CK(de)EIFPIQMEGVK_	91	1	NO	NO	1.58424	0.439196
1868	O96008	TOM40_HUMAN	No	_EIFPIQMEGVK(de)ITVNK_	102	1	NO	NO	1.16689	0.339006
1869	O96008	TOM40_HUMAN	No	_K(de)IPPIPITIAIGAFINHR_	331	1	NO	NO	-0.87564	0.294684
1871	O96008	TOM40_HUMAN	No	_SK(de)MAIQTQQSK_	175	1	NO	NO	0.0880192	0.178209
1874	P00338	LDHA_HUMAN	No	_(ac)ATIK(de)DQIIYNIIKEEQTPQNK_	5	1	NO	NO	-0.195177	0.342586
1875	P00338	LDHA_HUMAN	No	_DQIIYNIIK(de)EEQTPQNK_	14	1	NO	NO	-0.104419	0.26089
1876	P00338	LDHA_HUMAN	No	_EEQTPQNK(de)ITVVGVGAVGMACAISIIMK_	22	1	NO	NO	-0.431942	0.163441
1878	P00338	LDHA_HUMAN	No	_IK(de)GEMMDIQHGSIFIR_	59	1	NO	NO	-0.186426	0.231311
1879	P00338	LDHA_HUMAN	No	_EVHK(de)QVVESAYEVIK_	232	1	NO	NO	0.0628626	0.0779183
1880	P00338	LDHA_HUMAN	No	_QVVESAYEVIK(de)IK_	243	1	NO	NO	-0.0735906	0.0498285
1881	P00338	LDHA_HUMAN	No	_YSPNCK(de)IIIVSNPVDIITYVAWK_	132	1	NO	NO	-0.330474	0.114015
1882	P00338	LDHA_HUMAN	No	_ISGFPK(de)NR_	155	2	NO	NO	-0.0212305	0.0582555
1884	P00338	LDHA_HUMAN	No	_SADTIWGIQK(de)EIQF_	328	1	NO	NO	-0.156097	0.237709
1885	P00338	LDHA_HUMAN	No	_NVNIFK(de)FIIPNVVK_	118	1	NO	NO	-0.581073	0.595856
1886	P00338	LDHA_HUMAN	No	_TIHPDIGTDK(de)DKEQWK_	222	1	NO	NO	0.113038	0.0755127
1887	P00338	LDHA_HUMAN	No	_TPK(de)IVSGKDYNVTANSK_	76	1	NO	NO	-0.0291148	0.018077
1889	P00367	DHE3_HUMAN	No	_CAVVDVPFGGAKAGVK(de)_	187;187	2	NO	NO	0.707443	0.407054
1890	P00367	DHE3_HUMAN	No	_INPK(de)NYTDNEIEKITR_	191	1	NO	NO	-0.186541	0.0402077
1892	P00367	DHE3_HUMAN	No	_IIAEGANGPTTPEADK(de)IFIER_	415;415	2	NO	NO	2.21437	0.830678
1895	P00367	DHE3_HUMAN	No	_EIEDFK(de)IQHGSIIGFPK_	352;352	2	NO	NO	0.261726	0.0883638
1898	P00367	DHE3_HUMAN	No	_FTMEIAK(de)K_	211;211	2	NO	NO	2.49194	0.931204
1899	P00367	DHE3_HUMAN	No	_K(de)GFIGPGIDVPAPDMSTGER_	212	1	NO	NO	-0.801222	0.221052
1900	P00367	DHE3_HUMAN	No	_GASIVEDK(de)IVEDIR_	84	1	NO	NO	1.1093	0.313187
1901	P00367	DHE3_HUMAN	No	_IIK(de)PCNHVISISFPIRR_	110;110	2	NO	NO	1.95188	0.651248
1902	P00367	DHE3_HUMAN	No	_NYTDNEIEK(de)ITRR_	200	1	NO	NO	-0.31087	0.0839885
1903	P00367	DHE3_HUMAN	No	_ISGASEK(de)DIVHSGIAYTM(ox)ER_	503	1	NO	NO	-0.304678	0.219325
1904	P00367	DHE3_HUMAN	No	_ITFK(de)YER_	457;457	2	NO	NO	-0.145599	0.0308481
1907	P00367	DHE3_HUMAN	No	_TAMK(de)YNIGIDIR_	527	1	NO	NO	0.0618637	0.0119152
1908	P00367	DHE3_HUMAN	No	_YSTDVSVDEVK(de)AIASIMTYK_	162;162	2	NO	NO	-1.40026	0.499289
1910	P00387	NB5R3_HUMAN	No	_VYFKDTHPK(de)FPAGGK_	120	1	NO	NO	0.305679	0.24873
1911	P00387	NB5R3_HUMAN	No	_K(de)SNPIIR_	164	1	NO	NO	0.692443	1.45297
1914	P00387	NB5R3_HUMAN	No	_IDGNIVVRPYTPISSDDDK(de)GFVDIVIK_	103	1	NO	NO	0.598899	0.113442
1915	P00387	NB5R3_HUMAN	No	_NK(de)HSAR_	228	1	NO	NO	0.902612	1.41717
1916	P00387	NB5R3_HUMAN	No	_STPAITIESPDIK(de)YPIR_	42	1	NO	NO	2.58533	0.790171
1917	P00387	NB5R3_HUMAN	No	_TVK(de)SVGMIAGGTGITPMIQVIR_	173	1	NO	NO	1.70512	2.23062
1918	P00390	GSHR_HUMAN	No	_AAVVESHK(de)IGGTCVNVGCVPK_	97	1	NO	NO	-0.88311	0.541239
1920	P00390	GSHR_HUMAN	No	_IGIQTDDK(de)GHIIVDEFQNTNVK_	354	1	NO	NO	-0.163988	0.209115
1921	P00390	GSHR_HUMAN	No	_INAIYQNNITK(de)SHIEIIR_	164	1	NO	NO	0.169653	0.0367765
1922	P00403	COX2_HUMAN	No	_MMITSQDVIHSWAVPTIGIK(de)TDAIPGR_	171	1	NO	NO	1.41426	0.389597
1923	P00441	SODC_HUMAN	No	_(ac)ATK(de)AVCVIKGDGPVQGIINFEQK_	4	1	NO	NO	-1.96001	1.3208
1924	P00441	SODC_HUMAN	No	_GDGPVQGIINFEQK(de)ESNGPVKVWGSIK_	24	1	NO	NO	-1.92682	0.540231
1925	P00441	SODC_HUMAN	No	_VWGSIK(de)GITEGIHGFHVHEFGDNTAGCTSAGPHFNPISR_	37	1	NO	NO	-1.38218	0.295292
1926	P00441	SODC_HUMAN	No	_HVGDIGNVTADK(de)DGVADVSIEDSVISISGDHCIIGR_	92	1	NO	NO	-0.875663	0.188045
1927	P00441	SODC_HUMAN	No	_K(de)HGGPKDEER_	71	1	NO	NO	0.0669597	0.0371419
1928	P00441	SODC_HUMAN	No	_TIVVHEK(de)ADDIGKGGNEESTK_	123	1	NO	NO	1.11118	0.295449
1929	P00491	PNPH_HUMAN	No	_AISTWK(de)QMGEQR_	179	1	NO	NO	0.525887	0.128351
1931	P00492	HPRT_HUMAN	No	_IK(de)SYCNDQSTGDIK_	103	1	NO	NO	-0.994365	0.486565
1932	P00492	HPRT_HUMAN	No	_MVK(de)VASIIVK_	159	1	NO	NO	-0.0204762	0.0207861
1933	P00492	HPRT_HUMAN	No	_VASIIVK(de)R_	166	2	NO	NO	-0.547275	0.146554
1935	P00505	AATM_HUMAN	No	_DVFIPK(de)PTWGNHTPIFR_	159	1	NO	NO	-0.10759	0.148961
1936	P00505	AATM_HUMAN	No	_IIKEFSIYMTK(de)DGR_	404	1	NO	NO	-0.337086	0.0860295
1939	P00505	AATM_HUMAN	No	_FFK(de)FSR_	150	1	NO	NO	0.0833503	0.0960374
1940	P00505	AATM_HUMAN	No	_ISVAGVTSSNVGYIAHAIHQVTK(de)_	430	1	NO	NO	0.926864	0.389613
1941	P00505	AATM_HUMAN	No	_K(de)QWIQEVK_	338	1	NO	NO	0.994282	0.234319
1942	P00505	AATM_HUMAN	No	_MNIGVGAYRDDNGK(de)PYVIPSVR_	73	1	NO	NO	0.660314	0.137048
1943	P00505	AATM_HUMAN	No	_NIDKEYIPIGGIAEFCK(de)ASAEIAIGENSEVIK_	107	1	NO	NO	0.337445	0.0833701
1944	P00505	AATM_HUMAN	No	_VGAFTMVCK(de)DADEAK_	296	1	NO	NO	-0.890214	0.192119
1951	P00558	PGK1_HUMAN	No	_NGVK(de)ITIPVDFVTADKFDENAK_	279	1	NO	NO	-0.304634	0.064554
1952	P00558	PGK1_HUMAN	No	_K(de)EINYFAK_	192	1	NO	NO	-0.821923	0.16625
1953	P00558	PGK1_HUMAN	No	_AHSSMVGVNIPQK(de)AGGFIMKK_	184	1	NO	NO	-0.403317	0.323081
1954	P00558	PGK1_HUMAN	No	_VADK(de)IQIINNMIDKVNEMIIGGGMAFTFIK_	220	1	NO	NO	-2.05516	0.650771
1955	P00558	PGK1_HUMAN	No	_AK(de)QIVWNGPVGVFEWEAFAR_	332	1	NO	NO	-0.707675	0.173865
1956	P00558	PGK1_HUMAN	No	_ASISK(de)IGDVYVNDAFGTAHR_	156	2	NO	NO	-0.107176	0.325872
1957	P00558	PGK1_HUMAN	No	_VK(de)AEPAKIEAFR_	141	1	NO	NO	0.0841378	0.169196
1958	P00558	PGK1_HUMAN	No	_SIIGKDVIFIK(de)DCVGPEVEK_	97	2	NO	NO	1.20197	0.477204
1959	P00558	PGK1_HUMAN	No	_FHVEEEGK(de)GKDASGNK_	131	1	NO	NO	0.368985	0.237863
1960	P00558	PGK1_HUMAN	No	_GK(de)DASGNKVK_	133	1	NO	NO	-0.356129	0.226659
1962	P00558	PGK1_HUMAN	No	_WNTEDKVSHVSTGGGASIEIIEGK(de)VIPGVDAISNI_	406	2	NO	NO	-2.25178	0.575448
1963	P00558	PGK1_HUMAN	No	_GTK(de)AIMDEVVK_	353	1	NO	NO	0.101578	0.180124
1964	P00558	PGK1_HUMAN	No	_IK(de)AAVPSIK_	41	1	NO	NO	0.0562823	0.0971605
1966	P00558	PGK1_HUMAN	No	_VINNMEIGTSIFDEEGAKIVK(de)DIMSK_	267	1	NO	NO	-0.0768623	0.142237
1968	P00558	PGK1_HUMAN	No	_(ac)SISNK(de)ITIDKIDVK_	6	1	NO	NO	-0.210697	0.700802
1969	P00558	PGK1_HUMAN	No	_SVVIMSHIGRPDGVPM(ox)PDK(de)YSIEPVAVEIK_	75	1	NO	NO	1.3611	0.451979
1970	P00558	PGK1_HUMAN	No	_VDFNVPMK(de)NNQITNNQR_	30	1	NO	NO	0.0220627	0.0457456
1971	P00568	KAD1_HUMAN	No	_IVQK(de)YGYTHISTGDIIR_	31	1	NO	NO	-0.659267	0.311338
1973	P00568	KAD1_HUMAN	No	_TKIIFVVGGPGSGK(de)GTQCEK_	21	1	NO	NO	-0.0205628	0.0122761
1974	P00568	KAD1_HUMAN	No	_K(de)ISEIMEK_	56	1	NO	NO	-0.94704	0.274593
1975	P00568	KAD1_HUMAN	No	_K(de)VNAEGSVDSVFSQVCTHIDAIK_	172	1	NO	NO	-1.04625	0.239156
1976	P00568	KAD1_HUMAN	No	_VNTSK(de)GFIIDGYPR_	88	1	NO	NO	2.79439	1.22664
1977	P00846	ATP6_HUMAN	No	_IITTQQWIIK(de)ITSK_	51	1	NO	NO	-1.067	2.87118
1978	P00973	OAS1_HUMAN	No	_VVK(de)GGSSGK_	60	1	NO	NO	0.187489	0.0356818
1981	P01584	IL1B_HUMAN	No	_ISDHHYSK(de)GFR_	59	1	NO	NO	1.41572	0.447643
1984	P01889	1B07_HUMAN	No	_ADPPK(de)THVTHHPISDHEATIR_	210;210	20	NO	NO	0.568848	0.117488
1985	P01889	1B07_HUMAN	No	_GHDQYAYDGK(de)DYIAINEDIR_	145	1	NO	NO	1.92441	0.615613
1986	P01889	1B07_HUMAN	No	_K(de)WEAAR_	170;170;170;170;170	27	NO	NO	-1.44235	0.383347
1987	P01889	1B07_HUMAN	No	_NTQIYK(de)AQAQTDRESIR_	92	3	NO	NO	1.66433	0.594191
1988	P01889	1B07_HUMAN	No	_TFQK(de)WAAVVVPSGEEQR_	267;267;267;267	24	NO	NO	1.52619	0.358204
1991	P01889	1B07_HUMAN	No	_YTCHVQHEGIPK(de)PITIR_	292;292;292;292;292;292;292;292;292	33	NO	NO	-1.00138	0.217851
1992	P01903	DRA_HUMAN	No	_NGK(de)PVTTGVSETVFIPR_	151	1	NO	NO	-1.54946	0.467407
1993	P02452	CO1A1_HUMAN	No	_DIK(de)MCHSDWK_	1263	1	NO	NO	1.46578	0.573124
1995	P02452	CO1A1_HUMAN	No	_DRDIEVDTTIK(de)SISQQIENIR_	1236	1	NO	NO	2.06575	0.625521
1997	P02452	CO1A1_HUMAN	No	_K(de)AIIIQGSNEIEIR_	1386	2	NO	NO	0.262242	0.0589234
1998	P02452	CO1A1_HUMAN	No	_TVIEYK(de)TTK_	1430	1	NO	NO	1.98467	0.620104
2000	P02461	CO3A1_HUMAN	No	_AIK(de)IMGSNEGEFKAEGNSK_	1391	2	NO	NO	1.61779	0.589651
2003	P02461	CO3A1_HUMAN	No	_DIK(de)FCHPEIK_	1266	1	NO	NO	1.89848	0.613796
2009	P02511	CRYAB_HUMAN	No	_HFSPEEIK(de)VK_	90	1	NO	NO	2.5845	0.520902
2011	P02511	CRYAB_HUMAN	No	_VK(de)VIGDVIEVHGKHEER_	92	1	NO	NO	3.62707	0.89886
2013	P02511	CRYAB_HUMAN	No	_K(de)QVSGPER_	150	1	NO	NO	4.16344	1.21138
2014	P02511	CRYAB_HUMAN	No	_K(de)YRIPADVDPITITSSISSDGVITVNGPR_	121	1	NO	NO	3.38857	0.909167
2015	P02545	LMNA_HUMAN	No	_IQIEISK(de)VREEFK_	108	1	NO	NO	0.0290675	0.0557769
2016	P02545	LMNA_HUMAN	No	_ASSHSSQTQGGGSVTK(de)KR_	417	1	NO	NO	0.674873	0.583551
2017	P02545	LMNA_HUMAN	No	_IKDIEAIINSK(de)EAAISTAISEK_	144	1	NO	NO	0.479208	0.933218
2018	P02545	LMNA_HUMAN	No	_VREEFK(de)EIK_	114	1	NO	NO	0.438549	1.0659
2019	P02545	LMNA_HUMAN	No	_IQTM(ox)KEEIDFQK(de)NIYSEEIR_	208	1	NO	NO	0.359731	0.537414
2020	P02545	LMNA_HUMAN	No	_TYSAK(de)IDNAR_	270	1	NO	NO	0.249469	0.468171
2021	P02545	LMNA_HUMAN	No	_EVSGIK(de)AAYEAEIGDARK_	78	1	NO	NO	0.0916053	0.102324
2022	P02545	LMNA_HUMAN	No	_QNGDDPIITYRFPPK(de)FTIK_	486	1	NO	NO	0.444133	0.622114
2023	P02545	LMNA_HUMAN	No	_TIEGEIHDIRGQVAK(de)IEAAIGEAK_	171	1	NO	NO	0.44093	0.374461
2024	P02545	LMNA_HUMAN	No	_K(de)QIQDEM(ox)IR_	181	1	NO	NO	0.230885	0.602229
2025	P02545	LMNA_HUMAN	No	_IRIDSISAQISQIQK(de)QIAAK_	311	1	NO	NO	0.457058	0.979024
2026	P02545	LMNA_HUMAN	No	_QIAAK(de)EAK_	316	1	NO	NO	-0.647465	0.181705
2027	P02545	LMNA_HUMAN	No	_RIIAEK(de)ER_	341	2	NO	NO	0.343993	0.621091
2028	P02545	LMNA_HUMAN	No	_IQEK(de)EDIQEINDRIAVYIDR_	32	1	NO	NO	-0.768411	0.145221
2029	P02545	LMNA_HUMAN	No	_NK(de)SNEDQSM(ox)GNWQIKR_	457	1	NO	NO	0.239137	0.384148
2030	P02545	LMNA_HUMAN	No	_SNEDQSMGNWQIK(de)R_	470	1	NO	NO	0.190025	0.24115
2031	P02545	LMNA_HUMAN	No	_IVEIDNGK(de)QREFESR_	233	1	NO	NO	0.00223438	0.00134712
2032	P02545	LMNA_HUMAN	No	_NTKK(de)EGDIIAAQAR_	123	1	NO	NO	0.229968	0.380153
2033	P02545	LMNA_HUMAN	No	_RK(de)IESTESR_	420	1	NO	NO	0.0327375	0.021367
2034	P02545	LMNA_HUMAN	No	_TIDSVAK(de)ER_	97	1	NO	NO	0.259121	0.453832
2036	P02545	LMNA_HUMAN	No	_NIYSEEIRETK(de)R_	219	1	NO	NO	0.797548	0.173653
2037	P02545	LMNA_HUMAN	No	_TVICGTCGQPADK(de)ASASGSGAQVGGPISSGSSASSVTVTR_	597	1	NO	NO	0.297472	0.0470592
2038	P02545	LMNA_HUMAN	No	_VAVEEVDEEGK(de)FVR_	450	1	NO	NO	0.224463	0.228647
2039	P02549	SPTA1_HUMAN	No	_IAQFVEHWEK(de)IK_	1803	1	NO	NO	-1.72594	0.459494
2040	P02549	SPTA1_HUMAN	No	_QK(de)IIEK_	2030;1090;332	4	NO	NO	2.62307	0.701532
2042	P02649	APOE_HUMAN	No	_ISK(de)EIQAAQAR_	113	1	NO	NO	-1.42951	0.556783
2043	P02749	APOH_HUMAN	No	_VSFFCK(de)NK_	301	1	NO	NO	0.622679	0.595615
2045	P02751	FINC_HUMAN	No	_WKCDPVDQCQDSETGTFYQIGDSWEK(de)YVHGVR_	578	1	NO	NO	1.90828	0.61425
2046	P02751	FINC_HUMAN	No	_CFDHAAGTSYVVGETWEK(de)PYQGWMMVDCTCIGEGSGR_	203	1	NO	NO	2.06761	0.625605
2047	P02751	FINC_HUMAN	No	_CHEGGQSYK(de)IGDTWR_	149	1	NO	NO	2.42408	0.794396
2048	P02751	FINC_HUMAN	No	_DGQERDAPIVNK(de)VVTPISPPTNIHIEANPDTGVITVSWER_	1169	1	NO	NO	1.72277	0.412727
2049	P02751	FINC_HUMAN	No	_ESK(de)PITAQQTTK_	987	1	NO	NO	-0.138846	0.0316807
2051	P02751	FINC_HUMAN	No	_GFNCESKPEAEETCFDK(de)YTGNTYR_	100	1	NO	NO	0.85146	0.179098
2052	P02751	FINC_HUMAN	No	_GIAFTDVDVDSIK(de)IAWESPQGQVSR_	1649	1	NO	NO	1.99142	0.586232
2053	P02751	FINC_HUMAN	No	_GIK(de)PGVVYEGQIISIQQYGHQEVTR_	672	1	NO	NO	1.65297	0.59294
2054	P02751	FINC_HUMAN	No	_GNIIQCICTGNGRGEWK(de)CER_	269	1	NO	NO	2.28081	0.637817
2055	P02751	FINC_HUMAN	No	_IGDQWDK(de)QHDMGHMMR_	486	1	NO	NO	3.07445	0.994853
2057	P02751	FINC_HUMAN	No	_IGFK(de)IGVRPSQGGEAPR_	1116	1	NO	NO	0.273808	0.0411958
2058	P02751	FINC_HUMAN	No	_ITGYIIK(de)YEKPGSPPR_	1936	1	NO	NO	0.193555	0.0303894
2061	P02751	FINC_HUMAN	No	_M(ox)SESGFK(de)IICQCIGFGSGHFR_	2230	1	NO	NO	1.65148	0.363338
2062	P02751	FINC_HUMAN	No	_NIQPASEYTVSIVAIK(de)GNQESPK_	1070	1	NO	NO	3.08366	0.946584
2063	P02751	FINC_HUMAN	No	_NTFAEVTGISPGVTYYFK(de)VFAVSHGR_	976	1	NO	NO	1.07609	0.229084
2066	P02751	FINC_HUMAN	No	_QDGHIWCSTTSNYEQDQK(de)YSFCTDHTVIVQTR_	397	1	NO	NO	2.2318	0.635494
2067	P02751	FINC_HUMAN	No	_QK(de)TGIDSPTGIDFSDITANSFTVHWIAPR_	1355	1	NO	NO	1.62791	0.323147
2068	P02751	FINC_HUMAN	No	_QYNVGPSVSK(de)YPIR_	1050	1	NO	NO	2.5146	0.649691
2069	P02751	FINC_HUMAN	No	_SYTITGIQPGTDYK(de)IYIYTINDNAR_	1880	1	NO	NO	0.241854	0.0468111
2070	P02751	FINC_HUMAN	No	_TEIDKPSQMQVTDVQDNSISVK(de)WIPSSSPVTGYR_	1561	1	NO	NO	1.84059	0.609351
2071	P02751	FINC_HUMAN	No	_TIK(de)PDVR_	1862	1	NO	NO	1.63205	0.386298
2072	P02751	FINC_HUMAN	No	_TK(de)TETITGFQVDAVPANGQTPIQR_	1837	1	NO	NO	3.00316	0.65507
2073	P02751	FINC_HUMAN	No	_VGDTYERPK(de)DSM(ox)IWDCTCIGAGR_	116	1	NO	NO	1.5524	0.375039
2074	P02751	FINC_HUMAN	No	_VTTTPK(de)NGPGPTK_	1579	1	NO	NO	1.46412	0.953732
2075	P02751	FINC_HUMAN	No	_WCGTTQNYDADQK(de)FGFCPMAAHEEICTTNEGVMYR_	457	1	NO	NO	1.78529	0.604938
2076	P02751	FINC_HUMAN	No	_WCHDNGVNYK(de)IGEKWDR_	2259	1	NO	NO	1.7533	0.555246
2077	P02751	FINC_HUMAN	No	_WK(de)EATIPGHINSYTIK_	655	1	NO	NO	2.1557	0.643162
2078	P02786	TFR1_HUMAN	No	_AAAEK(de)IFGNMEGDCPSDWKTDSTCR_	344	1	NO	NO	-0.754971	0.17129
2081	P02786	TFR1_HUMAN	No	_DQHFVK(de)IQVK_	189	1	NO	NO	-0.801165	0.248957
2082	P02786	TFR1_HUMAN	No	_IQVK(de)DSAQNSVIIVDKNGR_	193	1	NO	NO	-0.167761	0.0673931
2085	P02786	TFR1_HUMAN	No	_IINIFGVIK(de)GFVEPDHYVVVGAQR_	394	1	NO	NO	1.44937	0.570965
2086	P02786	TFR1_HUMAN	No	_IPEINK(de)VAR_	585	1	NO	NO	-0.622273	0.159903
2087	P02786	TFR1_HUMAN	No	_K(de)ISEKIDSTDFTGTIK_	130	1	NO	NO	1.16484	0.337294
2088	P02786	TFR1_HUMAN	No	_NVK(de)ITVSNVIK_	374	1	NO	NO	1.11508	0.288547
2089	P02786	TFR1_HUMAN	No	_RIYWDDIK(de)R_	128	1	NO	NO	-1.4365	0.54553
2090	P02786	TFR1_HUMAN	No	_VEYHFISPYVSPK(de)ESPFR_	693	1	NO	NO	-1.30115	0.299531
2091	P02795	MT2_HUMAN	No	_SCCSCCPVGCAK(de)CAQGCICK_	43	6	NO	NO	-3.01341	1.02724
2093	P03928	ATP8_HUMAN	No	_MK(de)NYNKPWEPK_	45	1	NO	NO	-0.0651776	0.0779726
2094	P03928	ATP8_HUMAN	No	_NYNKPWEPK(de)WTK_	54	1	NO	NO	-0.240511	0.344307
2095	P03928	ATP8_HUMAN	No	_WTK(de)ICSIHSIPPQS_	57	1	NO	NO	-2.94464	1.09328
2096	P04040	CATA_HUMAN	No	_AAQK(de)ADVITTGAGNPVGDKINVITVGPR_	23	1	NO	NO	-2.31731	0.687655
2097	P04040	CATA_HUMAN	No	_(ac)ADSRDPASDQMQHWK(de)EQR_	16	1	NO	NO	1.31328	0.383656
2100	P04040	CATA_HUMAN	No	_IVNANGEAVYCKFHYK(de)TDQGIK_	237	1	NO	NO	0.0440412	0.0553438
2102	P04040	CATA_HUMAN	No	_K(de)TPIAVR_	106	1	NO	NO	-0.215396	0.341717
2104	P04075	ALDOA_HUMAN	No	_SK(de)GGVVGIKVDK_	101	1	NO	NO	-0.228067	0.630304
2105	P04075	ALDOA_HUMAN	No	_RAIANSIACQGK(de)YTPSGQAGAAASESIFVSNHAY_	342	1	NO	NO	-0.278056	0.940188
2106	P04075	ALDOA_HUMAN	No	_AIQASAIK(de)AWGGKK_	312	1	NO	NO	-0.0400108	0.0544946
2109	P04075	ALDOA_HUMAN	No	_ENIK(de)AAQEEYVKR_	322	1	NO	NO	-0.0796896	0.269325
2110	P04075	ALDOA_HUMAN	No	_KDGADFAK(de)WR_	147;147	2	NO	NO	0.48246	0.603037
2111	P04075	ALDOA_HUMAN	No	_CPIIK(de)PWAITFSYGR_	294	1	NO	NO	-0.146646	0.213136
2112	P04075	ALDOA_HUMAN	No	_RCQYVTEK(de)VIAAVYK_	208;208	3	NO	NO	-0.0666475	0.101123
2113	P04075	ALDOA_HUMAN	No	_VIAAVYK(de)AISDHHIYIEGTIIKPNMVTPGHACTQK_	215	2	NO	NO	-2.44962	0.530948
2114	P04075	ALDOA_HUMAN	No	_CVIK(de)IGEHTPSAIAIM(ox)ENANVIAR_	153	1	NO	NO	0.000318338	0.000408246
2115	P04075	ALDOA_HUMAN	No	_VDK(de)GVVPIAGTNGETTTQGIDGISER_	111	1	NO	NO	-0.159942	0.376764
2116	P04075	ALDOA_HUMAN	No	_IVAPGK(de)GIIAADESTGSIAKR_	28	1	NO	NO	0.128802	0.297986
2117	P04075	ALDOA_HUMAN	No	_PYQYPAITPEQKK(de)EISDIAHR_	14	1	NO	NO	1.72363	0.360801
2119	P04075	ALDOA_HUMAN	No	_YASICQQNGIVPIVEPEIIPDGDHDIK(de)R_	200;200	2	NO	NO	-0.178684	0.4525
2120	P04080	CYTB_HUMAN	No	_SQVVAGTNYFIK(de)VHVGDEDFVHIR_	56	1	NO	NO	-3.42383	1.10603
2121	P04080	CYTB_HUMAN	No	_KFPVFK(de)AVSFK_	39	1	NO	NO	-1.45487	0.393832
2122	P04080	CYTB_HUMAN	No	_SQIEEKENK(de)K_	33	1	NO	NO	-2.16213	1.21351
2125	P04083	ANXA1_HUMAN	No	_AAM(ox)K(de)GIGTDEDTIIEIIASR_	128	1	NO	NO	3.19436	1.02301
2126	P04083	ANXA1_HUMAN	No	_K(de)AITGHIEEVVIAIIK_	98	1	NO	NO	1.40753	0.280282
2128	P04083	ANXA1_HUMAN	No	_GVDEATIIDIITK(de)R_	71	1	NO	NO	3.77305	1.25206
2129	P04083	ANXA1_HUMAN	No	_(ac)AMVSEFIK(de)QAWFIENEEQEYVQTVK_	9	1	NO	NO	1.18812	0.497867
2130	P04083	ANXA1_HUMAN	No	_IHQAM(ox)K(de)GVGTR_	287	1	NO	NO	3.27027	1.29628
2131	P04083	ANXA1_HUMAN	No	_RDIAK(de)DITSDTSGDFR_	166	1	NO	NO	1.55429	0.419666
2132	P04083	ANXA1_HUMAN	No	_VIDIEIKGDIEK(de)CITAIVK_	262	1	NO	NO	1.82034	0.374857
2133	P04083	ANXA1_HUMAN	No	_HK(de)AIIR_	294	1	NO	NO	3.58482	1.24058
2134	P04083	ANXA1_HUMAN	No	_RK(de)GTDVNVFNTIITTR_	214	1	NO	NO	1.81945	0.997827
2137	P04083	ANXA1_HUMAN	No	_QQIK(de)AAYIQETGKPIDETIK_	81	1	NO	NO	0.844528	0.173128
2138	P04083	ANXA1_HUMAN	No	_VFQK(de)YTK_	239	1	NO	NO	3.93042	1.29341
2139	P04083	ANXA1_HUMAN	No	_YTK(de)YSKHDMNK_	242	1	NO	NO	3.96149	1.24609
2140	P04083	ANXA1_HUMAN	No	_SEIDMNDIK(de)AFYQK_	312	1	NO	NO	2.26167	0.540435
2141	P04083	ANXA1_HUMAN	No	_TNK(de)EIR_	147	1	NO	NO	3.22557	1.15078
2142	P04083	ANXA1_HUMAN	No	_VYREEIK(de)R_	161	1	NO	NO	3.22846	1.22435
2143	P04179	SODM_HUMAN	No	_DFGSFDK(de)FKEK_	130	1	NO	NO	1.12061	0.391214
2145	P04181	OAT_HUMAN	No	_DWDAWK(de)VCIR_	392	1	NO	NO	-1.85433	0.666899
2147	P04181	OAT_HUMAN	No	_GK(de)GIYIWDVEGR_	66	1	NO	NO	1.19437	0.349761
2148	P04181	OAT_HUMAN	No	_IFNYHK(de)VIPMNTGVEAGETACK_	135	1	NO	NO	-2.66795	0.808884
2149	P04181	OAT_HUMAN	No	_K(de)TVQGPPTSDDIFER_	32	1	NO	NO	-0.454035	0.0972244
2150	P04181	OAT_HUMAN	No	_K(de)WGYTVK_	155	1	NO	NO	-0.733077	0.167707
2151	P04181	OAT_HUMAN	No	_SQVDK(de)ITITSR_	107	1	NO	NO	3.0139	1.22393
2153	P04271	S100B_HUMAN	No	_EGDK(de)HKIK_	25	1	NO	NO	-1.68523	0.433063
2154	P04271	S100B_HUMAN	No	_IKK(de)SEIK_	30	2	NO	NO	-0.286221	0.0812048
2155	P04271	S100B_HUMAN	No	_(ac)SEIEK(de)AMVAIIDVFHQYSGR_	6	1	NO	NO	1.50035	1.13839
2156	P04350	TBB4A_HUMAN	No	_KEAESCDCIQGFQITHSIGGGTGSGMGTIIISK(de)IR_	154	1	NO	NO	-0.834769	0.749822
2157	P04350	TBB4A_HUMAN	No	_EIVHIQAGQCGNQIGAK(de)_	19;19;19;19;19;19	6	NO	NO	-1.40425	0.468501
2160	P04350	TBB4A_HUMAN	No	_K(de)IAVNMVPFPR_	252;252;252;252;252;252;252;252	11	NO	NO	0.793002	0.892797
2161	P04350	TBB4A_HUMAN	No	_MSMK(de)EVDEQMISVQSK_	324	1	NO	NO	1.72741	1.08212
2162	P04350	TBB4A_HUMAN	No	_NSSYFVEWIPNNVK(de)TAVCDIPPR_	350	1	NO	NO	-0.148612	0.342976
2163	P04350	TBB4A_HUMAN	No	_TIK(de)ITTPTYGDINHIVSATMSGVTTCIRFPGQINADIR_	216;216;216;216;216	5	NO	NO	0.103341	0.143392
2164	P04406	G3P_HUMAN	No	_VDIVAINDPFIDINYMVYMFQYDSTHGKFHGTVKAENGK(de)_	66	1	NO	NO	0.0324721	0.0457384
2166	P04406	G3P_HUMAN	No	_VIPEINGK(de)ITGMAFRVPTANVSVVDITCR_	227	2	NO	NO	0.231477	0.524452
2167	P04406	G3P_HUMAN	No	_GAIQNIIPASTGAAK(de)AVGK_	215	1	NO	NO	-0.323032	0.308207
2168	P04406	G3P_HUMAN	No	_VK(de)VGVNGFGR_	5	2	NO	NO	0.302899	0.566545
2169	P04406	G3P_HUMAN	No	_VPTANVSVVDITCRIEK(de)PAK_	251	1	NO	NO	-0.0352499	0.052326
2170	P04406	G3P_HUMAN	No	_VIHDNFGIVEGIM(ox)TTVHAITATQK(de)TVDGPSGKIWR_	186	1	NO	NO	0.0559211	0.0351006
2172	P04406	G3P_HUMAN	No	_WGDAGAEYVVESTGVFTTMEK(de)AGAHIQGGAKR_	107	2	NO	NO	-0.213898	0.381717
2173	P04406	G3P_HUMAN	No	_YDDIKK(de)_	260	2	NO	NO	-0.711598	0.115689
2174	P04406	G3P_HUMAN	No	_VVK(de)QASEGPIK_	263	2	NO	NO	0.0911399	0.145842
2176	P04406	G3P_HUMAN	No	_YDNSIK(de)IISNASCTTNCIAPIAK_	145	1	NO	NO	-0.816159	0.497661
2177	P04406	G3P_HUMAN	No	_VVDIM(ox)AHM(ox)ASK(de)E_	334	1	NO	NO	0.0244815	0.045242
2180	P04439	1A03_HUMAN	No	_DGEDQTQDTEIVETRPAGDGTFQK(de)WAAVVVPSGEEQR_	267;267;267;267	6	NO	NO	1.60018	0.58775
2181	P04439	1A03_HUMAN	No	_NVK(de)AQSQTDR_	92;92	3	NO	NO	-0.813882	0.24258
2182	P04439	1A03_HUMAN	No	_SWTAADMAAQITK(de)R_	168;168;168	5	NO	NO	2.22963	0.659414
2184	P04439	1A03_HUMAN	No	_YIENGK(de)ETIQR_	200;200;200;200;200;200;200	24	NO	NO	-1.3419	0.28733
2185	P04632	CPNS1_HUMAN	No	_(ac)MFIVNSFIK(de)GGGGGGGGGGGIGGGIGNVIGGIISGAGGGGGGGGGGGGGGGGGGGGTAMR_	9	1	NO	NO	0.986684	0.400015
2186	P04632	CPNS1_HUMAN	No	_VVTRHPDIK(de)TDGFGIDTCR_	135	1	NO	NO	1.47707	0.68108
2187	P04632	CPNS1_HUMAN	No	_YIWNNIK(de)R_	172	1	NO	NO	0.0747589	0.0152922
2188	P04746	AMYP_HUMAN	No	_ITGIIDIAIEK(de)DYVR_	187	1	NO	NO	-0.956787	0.636095
2189	P04746	AMYP_HUMAN	No	_YGAK(de)IGTVIR_	276	3	NO	NO	-0.126199	0.0376346
2190	P04792	HSPB1_HUMAN	No	_AQIGGPEAAK(de)SDETAAK_	198	1	NO	NO	0.271148	0.0543387
2191	P04792	HSPB1_HUMAN	No	_K(de)YTIPPGVDPTQVSSSISPEGTITVEAPMPK_	141	1	NO	NO	0.279193	0.0462797
2192	P04792	HSPB1_HUMAN	No	_VSIDVNHFAPDEITVK(de)TKDGVVEITGK_	112	1	NO	NO	-0.612383	0.0939344
2194	P04843	RPN1_HUMAN	No	_K(de)SIETEHK_	517	1	NO	NO	-0.974548	0.221607
2195	P04843	RPN1_HUMAN	No	_DTYIENEKIISGK(de)R_	592	1	NO	NO	-1.37539	0.349472
2196	P04843	RPN1_HUMAN	No	_DVPAYSQDTFK(de)VHYENNSPFITITSMTR_	215	1	NO	NO	1.30829	0.286412
2197	P04843	RPN1_HUMAN	No	_FFTVK(de)IPVAIDPGAK_	116	1	NO	NO	0.969629	0.458223
2198	P04843	RPN1_HUMAN	No	_IPVAIDPGAK(de)ISVIVETVYTHVIHPYPTQITQSEK_	126	1	NO	NO	0.0199436	0.00561323
2200	P04843	RPN1_HUMAN	No	_VSEMQKIDAQVK(de)EIVIK_	559	1	NO	NO	0.365343	0.797008
2201	P04843	RPN1_HUMAN	No	_K(de)DTYIENEK_	579	1	NO	NO	0.829459	0.437283
2203	P04843	RPN1_HUMAN	No	_IVAGK(de)IKK_	576	1	NO	NO	0.142956	0.0233642
2205	P04843	RPN1_HUMAN	No	_SIETEHK(de)AITSEIAIIQSR_	524	1	NO	NO	0.291354	0.490252
2206	P04843	RPN1_HUMAN	No	_MK(de)VACITEQVITIVNKR_	474	1	NO	NO	-0.332993	0.430337
2207	P04843	RPN1_HUMAN	No	_VACITEQVITIVNK(de)R_	488	1	NO	NO	0.19801	0.500087
2208	P04843	RPN1_HUMAN	No	_NVESYTK(de)IGNPTR_	187	1	NO	NO	0.13045	0.223565
2209	P04843	RPN1_HUMAN	No	_QFVVFEGNHYFYSPYPTK(de)TQTMR_	169	1	NO	NO	0.252811	0.413158
2210	P04843	RPN1_HUMAN	No	_RQEIVTK(de)IDHIIDAI_	599	1	NO	NO	0.26931	0.0668799
2211	P04843	RPN1_HUMAN	No	_TVDISSHIAK(de)VTAEVVIAHIGGGSTSR_	48	1	NO	NO	-0.0108449	0.0121758
2212	P04844	RPN2_HUMAN	No	_VTYPAKAK(de)_	403	1	NO	NO	0.166295	0.0334439
2213	P04844	RPN2_HUMAN	No	_ATVIQK(de)TSFTPVGDVFEINFMNVK_	322	1	NO	NO	0.476022	0.10585
2214	P04844	RPN2_HUMAN	No	_IHNQK(de)TGQEVVFVAEPDNK_	442	1	NO	NO	-1.04073	0.375349
2216	P04844	RPN2_HUMAN	No	_IK(de)ASIDRPFTNIESAFYSIVGISSIGAQVPDAK_	38	1	NO	NO	0.268424	0.0594124
2218	P04844	RPN2_HUMAN	No	_K(de)NFESISEAFSVASAAAVISHNR_	244	1	NO	NO	2.14414	0.686304
2219	P04844	RPN2_HUMAN	No	_IQVTNVISQPITQATVK(de)IEHAK_	306	1	NO	NO	1.40601	0.397115
2220	P04844	RPN2_HUMAN	No	_ISK(de)EETVIATVQAIQTASHISQQADIR_	154	1	NO	NO	2.27932	0.91604
2221	P04844	RPN2_HUMAN	No	_K(de)ACTYIR_	70	1	NO	NO	1.68857	0.737538
2222	P04844	RPN2_HUMAN	No	_MIAQQAVK(de)R_	627	1	NO	NO	0.779511	0.213963
2223	P04844	RPN2_HUMAN	No	_VK(de)ISTEVGITNVDISTVDKDQSIAPK_	368	1	NO	NO	1.28833	0.25019
2224	P04899	GNAI2_HUMAN	No	_EVK(de)IIIIGAGESGK_	35;35	3	NO	NO	0.0761101	0.0952264
2225	P04899	GNAI2_HUMAN	No	_IIIIGAGESGK(de)STIVK_	46;46	6	NO	NO	-0.627464	0.259565
2226	P04899	GNAI2_HUMAN	No	_FEDINK(de)R_	313	2	NO	NO	0.0317437	0.00593541
2227	P04899	GNAI2_HUMAN	No	_IFDSICNNK(de)WFTDTSIIIFINKK_	258	2	NO	NO	1.22991	0.401149
2228	P04899	GNAI2_HUMAN	No	_STIVK(de)QMK_	51;51;51	8	NO	NO	-0.014984	0.014456
2229	P04899	GNAI2_HUMAN	No	_ITHSPITICFPEYTGANK(de)YDEAASYIQSK_	296	1	NO	NO	2.0757	0.801203
2231	P04899	GNAI2_HUMAN	No	_VK(de)TTGIVETHFTFK_	181;180;181	4	NO	NO	-0.729563	0.305188
2232	P05023	AT1A1_HUMAN	No	_AAVPDAVGK(de)CR_	605	3	NO	NO	-0.472249	0.167949
2233	P05023	AT1A1_HUMAN	No	_DMTSEQIDDIIK(de)YHTEIVFAR_	683	1	NO	NO	-2.92854	1.15597
2234	P05023	AT1A1_HUMAN	No	_AVFQANQENIPIIK(de)R_	444	1	NO	NO	-1.80086	0.937883
2235	P05023	AT1A1_HUMAN	No	_CIEICCGSVK(de)EMR_	468	1	NO	NO	-0.527259	0.133994
2238	P05023	AT1A1_HUMAN	No	_DK(de)YEPAAVSEQGDKK_	9	1	NO	NO	-0.168973	0.221635
2239	P05023	AT1A1_HUMAN	No	_EVSMDDHK(de)ISIDEIHRK_	45	1	NO	NO	-0.203379	0.133475
2241	P05023	AT1A1_HUMAN	No	_IIFDNIKK(de)_	774	6	NO	NO	-0.897489	0.19813
2242	P05023	AT1A1_HUMAN	No	_IISANGCK(de)VDNSSITGESEPQTR_	212	1	NO	NO	-2.61296	0.921411
2243	P05023	AT1A1_HUMAN	No	_YQISIHK(de)NPNTSEPQHIIVMK_	494	1	NO	NO	-0.280706	0.0571332
2246	P05023	AT1A1_HUMAN	No	_NIEAVETIGSTSTICSDK(de)TGTITQNR_	377	4	NO	NO	-2.62397	1.01167
2247	P05023	AT1A1_HUMAN	No	_NPK(de)TDKIVNER_	840	1	NO	NO	-1.65259	1.47033
2250	P05023	AT1A1_HUMAN	No	_SAGIK(de)VIMVTGDHPITAK_	612	5	NO	NO	-1.15331	0.267698
2251	P05023	AT1A1_HUMAN	No	_VIMVTGDHPITAK(de)AIAK_	625	5	NO	NO	-1.26621	0.541248
[truncated: 8,976 more rows]

## Sheet: Supp. Table 2B
Supplementary Table 2B. List of 469 filtered DBT-peptides(p-value <0.05). For simplicity, only the leading protein mapping to the peptide is shown and the total proteins containg the DBT-peptide is listed in separate column.
id	Representative Protein	Uniprot ID	Kinase	DBT-ATP Sequence	Modification Sites	Shared Proteins	Sig. UP Resistant Group	Sig. UP Naïve Group	fold change(Res-Naive)	`-log10(p-value)
2772	P07948	LYN_HUMAN	Yes	_EGAK(de)FPIKWTAPEAINFGCFTIK_	404	3	YES	NO	4.52002	1.57411
9236	P78527	PRKDC_HUMAN	Yes	_GYGIFAGPCK(de)VINAK_	374	1	YES	NO	3.01839	1.59139
9926	Q05397	FAK1_HUMAN	Yes	_GK(de)IPIK_	583	1	YES	NO	3.30568	1.63179
10764	Q13557	KCC2D_HUMAN	Yes	_MITINPAK(de)R_	259	2	YES	NO	2.65405	1.62862
14188	Q9H2G2	SLK_HUMAN	Yes	_ETSVIAAAK(de)VIDTK_	63	1	YES	NO	4.81784	1.98654
22	A6NCE7	MP3B2_HUMAN	No	_TK(de)FIVPDHVNMSEIIK_	51	2	YES	NO	4.24785	2.01324
209	O00151	PDLI1_HUMAN	No	_VAASIGNAQKIPMCDK(de)CGTGIVGVFVK_	262	1	YES	NO	4.90116	2.16912
211	O00151	PDLI1_HUMAN	No	_QK(de)GHFFVEDQIYCEK_	296	1	YES	NO	4.96495	2.22592
212	O00151	PDLI1_HUMAN	No	_IK(de)GCTDNITITVAR_	71	1	YES	NO	5.28369	2.47559
638	O15173	PGRC2_HUMAN	No	_K(de)RDFSIEQIR_	100	1	YES	NO	4.22806	2.85231
780	O43242	PSMD3_HUMAN	No	_EIDTVTIEDIKEHVK(de)QIEK_	80	1	YES	NO	3.90425	1.7637
921	O43707	ACTN4_HUMAN	No	_ISIEMNGTIEDQISHIK(de)QYER_	691	1	YES	NO	5.88248	2.13912
968	O43795	MYO1B_HUMAN	No	_DISQAMWK(de)ASHAIIK_	544	1	YES	NO	3.50153	1.36253
975	O43795	MYO1B_HUMAN	No	_SIFPEGNPAK(de)INIK_	561	1	YES	NO	3.37328	1.75216
1069	O60506	HNRPQ_HUMAN	No	_SGK(de)HIGVCISVANNR_	232	1	YES	NO	3.73083	1.71568
1106	O60716	CTND1_HUMAN	No	_K(de)SDFQVNINNASR_	846	1	YES	NO	3.28812	1.57555
1307	O75369	FLNB_HUMAN	No	_VFGPGIEGK(de)DVFR_	1241	1	YES	NO	2.97234	1.36876
1308	O75369	FLNB_HUMAN	No	_QTPK(de)QR_	142;169;162	3	YES	NO	2.87989	1.45736
1475	O75718	CRTAP_HUMAN	No	_FIQFAYFK(de)ANNIPK_	157	1	YES	NO	2.86665	1.37046
1488	O75821	EIF3G_HUMAN	No	_KASK(de)AVAR_	94	1	YES	NO	4.33913	1.73707
1622	O94875	SRBS2_HUMAN	No	_TQTYRPISK(de)SHSDNSPNAFK_	151	1	YES	NO	3.18575	2.00326
1667	O94979	SC31A_HUMAN	No	_K(de)IDDASK_	1142	1	YES	NO	3.10249	1.85399
1718	O95302	FKBP9_HUMAN	No	_EMCVGEK(de)R_	441	2	YES	NO	2.97363	1.44048
1731	O95340	PAPS2_HUMAN	No	_AGEIK(de)GFTGIDSDYEKPETPER_	173	1	YES	NO	4.2216	1.671
1732	O95340	PAPS2_HUMAN	No	_DIHEIFVPENK(de)IDHVR_	233	1	YES	NO	5.13532	3.64004
2010	P02511	CRYAB_HUMAN	No	_TIPITREEK(de)PAVTAAPK_	166	1	YES	NO	4.17018	1.38573
2012	P02511	CRYAB_HUMAN	No	_IEK(de)DRFSVNIDVK_	72	1	YES	NO	6.14375	2.16547
2127	P04083	ANXA1_HUMAN	No	_MYGISICQAIIDETK(de)GDYEK_	332	1	YES	NO	4.40005	1.32802
2135	P04083	ANXA1_HUMAN	No	_NAIISIAK(de)GDRSEDFGVNEDIADSDAR_	185	1	YES	NO	5.26076	1.4018
2136	P04083	ANXA1_HUMAN	No	_SSK(de)GGPGSAVSPYPTFNPSSDVAAIHK_	29	1	YES	NO	5.33418	1.40504
2590	P07305	H10_HUMAN	No	_K(de)STDHPK_	21	1	YES	NO	2.96344	1.4325
2608	P07355	ANXA2_HUMAN	No	_RK(de)GTDVPK_	206	2	YES	NO	3.55018	1.56657
2611	P07355	ANXA2_HUMAN	No	_TDIEK(de)DIISDTSGDFRK_	157	2	YES	NO	3.8828	1.30514
2884	P08243	ASNS_HUMAN	No	_ETFEDSNIIPK(de)EIIWRPK_	460	1	YES	NO	3.43567	1.4061
3465	P11586	C1TC_HUMAN	No	_MHGGGPTVTAGIPIPK(de)AYIQENIEIVEK_	721	1	YES	NO	2.8852	1.38846
3515	P12081	SYHC_HUMAN	No	_IEAIEEK(de)IR_	403	1	YES	NO	3.24047	1.69987
3599	P12814	ACTN1_HUMAN	No	_IHKPPK(de)VQEK_	327	1	YES	NO	3.22853	1.40448
3978	P15311	EZRI_HUMAN	No	_ITEAEK(de)NER_	523	1	YES	NO	2.80435	1.43083
4090	P16615	AT2A2_HUMAN	No	_NAENAIEAIKEYEPEMGK(de)VYR_	128	2	YES	NO	3.12024	1.33478
4302	P18206	VINC_HUMAN	No	_EAEAASIK(de)IR_	1115	1	YES	NO	3.12067	1.32094
4308	P18206	VINC_HUMAN	No	_IIGAVAK(de)VR_	830	1	YES	NO	4.73686	1.89238
4310	P18206	VINC_HUMAN	No	_INQAK(de)GWIRDPSASPGDAGEQAIR_	281	1	YES	NO	3.30184	1.57054
4315	P18206	VINC_HUMAN	No	_NFTVEK(de)MSAEINEIIR_	236	1	YES	NO	4.23301	3.12472
4317	P18206	VINC_HUMAN	No	_TNISDEESEQATEMIVHNAQNIMQSVK(de)ETVR_	1103	1	YES	NO	3.13608	1.48894
4437	P19623	SPEE_HUMAN	No	_NPSTNFQEPVQPITQQQVAQMQIK(de)YYNSDVHR_	277	1	YES	NO	3.55714	1.71332
4520	P20962	PTMS_HUMAN	No	_SVEAAAEISAK(de)DIK_	15	1	YES	NO	4.98503	1.56983
4558	P21333	FLNA_HUMAN	No	_AWGPGIEGGVVGK(de)SADFVVEAIGDDVGTIGFSVEGPSQAK_	593	1	YES	NO	3.84205	1.57572
4586	P21333	FLNA_HUMAN	No	_SKGAGGQGK(de)VASK_	1003	1	YES	NO	3.59398	1.60738
4621	P21333	FLNA_HUMAN	No	_VK(de)MDCQECPEGYRVTYTPMAPGSYIISIK_	2473	1	YES	NO	3.97606	1.78483
4798	P23193	TCEA1_HUMAN	No	_KMDK(de)MVQK_	14	1	YES	NO	4.24636	1.71524
5273	P27816	MAP4_HUMAN	No	_HVPGGGNVQIQNK(de)K_	1028	1	YES	NO	3.50105	1.62844
5847	P35052	GPC1_HUMAN	No	_K(de)VAQVPIGPECSR_	236	1	YES	NO	3.64546	2.06904
5934	P35579	MYH9_HUMAN	No	_SMMQDREDQSIICTGESGAGK(de)TENTK_	180	1	YES	NO	3.69121	1.46444
5946	P35579	MYH9_HUMAN	No	_FISNGHVTIPGQQDK(de)DMFQETMEAMR_	316	1	YES	NO	5.23713	2.23449
5953	P35579	MYH9_HUMAN	No	_IAEFTTNITEEEEKSK(de)SIAK_	1016	1	YES	NO	4.73388	1.55497
6586	P41252	SYIC_HUMAN	No	_TIK(de)EQGR_	382	1	YES	NO	3.98022	1.72138
6801	P45877	PPIC_HUMAN	No	_IVIGIFGK(de)VVPK_	61	1	YES	NO	2.66697	1.42787
6960	P46821	MAP1B_HUMAN	No	_K(de)SSTPISEAK_	741	1	YES	NO	2.87038	1.56571
6962	P46821	MAP1B_HUMAN	No	_SAK(de)TATAGPGTTK_	2333	1	YES	NO	2.70998	1.30102
7100	P48426	PI42A_HUMAN	No	_TVK(de)HGAGAEISTVNPEQYSKR_	378	2	YES	NO	3.02666	1.5077
7692	P51858	HDGF_HUMAN	No	_AGDIIEDSPK(de)RPK_	167	1	YES	NO	3.04741	1.46942
7825	P52943	CRIP2_HUMAN	No	_VSSIGK(de)DWHK_	23	1	YES	NO	3.09107	1.87081
8107	P55084	ECHB_HUMAN	No	_AIAMGYKPK(de)AYIR_	334	1	YES	NO	3.70262	1.47657
8119	P55084	ECHB_HUMAN	No	_SHSIAK(de)K_	253	1	YES	NO	3.36373	1.57693
8126	P55145	MANF_HUMAN	No	_YAPK(de)AASAR_	174	1	YES	NO	4.2626	1.93823
8227	P56199	ITA1_HUMAN	No	_K(de)VIQDCEDENIQR_	292	1	YES	NO	2.66185	1.62929
8499	P61353	RL27_HUMAN	No	_EAK(de)VKFEER_	115	1	YES	NO	3.002	1.78623
8874	P62888	RL30_HUMAN	No	_IQIVMK(de)SGK_	23	1	YES	NO	3.83654	1.34613
8970	P63010	AP2B1_HUMAN	No	_K(de)TAAVCVAK_	139	2	YES	NO	3.72623	2.13625
9043	P63267	ACTH_HUMAN	No	_K(de)DIYANNVISGGTTMYPGIADR_	292;293	3	YES	NO	4.17854	1.41578
9045	P63267	ACTH_HUMAN	No	_VAPEEHPTIITEAPINPK(de)ANREK_	114;115	4	YES	NO	5.15223	1.40455
9061	P67936	TPM4_HUMAN	No	_AEVSEIK(de)CGDIEEEIKNVTNNIK_	153	1	YES	NO	4.501	1.46635
9731	Q01995	TAGL_HUMAN	No	_EFTESQIQEGK(de)HVIGIQM(ox)GSNR_	172	1	YES	NO	5.03977	1.53748
9735	Q01995	TAGL_HUMAN	No	_IGFQVWIK(de)NGVIISK_	57	1	YES	NO	3.96066	1.52982
9945	Q05682	CALD1_HUMAN	No	_SVQK(de)SSGVK_	659	1	YES	NO	2.69761	1.68838
9958	Q05682	CALD1_HUMAN	No	_IREEEEK(de)R_	601	1	YES	NO	4.32365	1.58439
10037	Q07065	CKAP4_HUMAN	No	_TAVDSIVAYSVK(de)IETNENNIESAK_	566	1	YES	NO	4.83051	1.62476
10151	Q09666	AHNK_HUMAN	No	_APK(de)IPMPDFDIHIKGPK_	2962	1	YES	NO	4.23705	1.53936
10172	Q09666	AHNK_HUMAN	No	_IKFPTMK(de)VPK_	310	1	YES	NO	3.73691	1.62484
10195	Q09666	AHNK_HUMAN	No	_MPFISISSPK(de)VSMPDVEINIK_	3414	1	YES	NO	3.2701	1.45789
10196	Q09666	AHNK_HUMAN	No	_FK(de)MPSMNIQTHK_	1568	1	YES	NO	3.37472	1.33703
10234	Q09666	AHNK_HUMAN	No	_IKFPK(de)FSMPK_	5235	1	YES	NO	3.07093	1.31097
10268	Q09666	AHNK_HUMAN	No	_K(de)GDRSPEPGQTWTR_	89	1	YES	NO	3.06099	1.81772
10310	Q09666	AHNK_HUMAN	No	_VDIDVPDVDVQGPDWHIK(de)MPK_	4187	1	YES	NO	4.32058	1.43309
10344	Q09666	AHNK_HUMAN	No	_VKMPK(de)FSMPGFK_	1389	1	YES	NO	3.47486	1.46859
10407	Q12905	ILF2_HUMAN	No	_K(de)IIGQEGDASYIASEISTWDGVIVTPSEK_	328	1	YES	NO	3.72383	1.54981
11070	Q14204	DYHC1_HUMAN	No	_WTDENIDTVAIK(de)HFPNIDREK_	2856	1	YES	NO	4.69795	2.36314
11312	Q14980	NUMA1_HUMAN	No	_AIQQVQEK(de)EVR_	891	1	YES	NO	2.81578	1.36146
11315	Q14980	NUMA1_HUMAN	No	_GRAQADIAIEK(de)AAR_	1024	1	YES	NO	3.07537	1.30409
11355	Q14980	NUMA1_HUMAN	No	_K(de)IITEKDAQIAMMQQR_	242	1	YES	NO	3.50358	1.47639
11403	Q15029	U5S1_HUMAN	No	_IWGDIYFNPK(de)TR_	352	1	YES	NO	3.85685	2.34043
11511	Q15149	PLEC_HUMAN	No	_EGVMVAK(de)K_	28	1	YES	NO	4.79666	1.54963
11662	Q15293	RCN1_HUMAN	No	_ITKEEIIENWNMFVGSQATNYGEDITK(de)NHDEI_	326	1	YES	NO	2.85849	1.43324
12236	Q5T890	ER6L2_HUMAN	No	_IDGSTK(de)SEERIK_	570	1	YES	NO	3.18566	1.30303
12319	Q6NUM9	RETST_HUMAN	No	_AGGAVITK(de)ATVQSVIIDSAGK_	317	1	YES	NO	2.81635	1.98386
12953	Q8TBC4	UBA3_HUMAN	No	_IQEVIDYITNSASIQMK(de)SPAITATIEGK_	398	1	YES	NO	3.09269	1.36491
13317	Q96AC1	FERM2_HUMAN	No	_NK(de)QITAR_	533	1	YES	NO	3.24364	1.30183
13389	Q96CT7	CC124_HUMAN	No	_VATSSK(de)VTR_	94	1	YES	NO	2.95201	1.83668
13669	Q99471	PFD5_HUMAN	No	_VVQTK(de)YVEAK_	42	1	NO	NO	2.62725	1.3312
13869	Q9BQE3	TBA1C_HUMAN	No	_TIQFVDWCPTGFK(de)VGINYQPPTVVPGGDIAK_	352	2	YES	NO	4.197	1.41155
14169	Q9H173	SIL1_HUMAN	No	_IQYEDK(de)FR_	109	1	YES	NO	4.30904	2.80406
14484	Q9NRC6	SPTN5_HUMAN	No	_IK(de)PIIK_	2186;843;191;841	11	YES	NO	3.3434	1.70156
14575	Q9NVD7	PARVA_HUMAN	No	_VIYNIFTK(de)YR_	367	1	YES	NO	3.94281	2.00513
14598	Q9NVP1	DDX18_HUMAN	No	_QKQNK(de)R_	463	1	YES	NO	3.8245	1.65045
14631	Q9NX62	IMPA3_HUMAN	No	_K(de)MFYIIK_	116	1	YES	NO	3.14021	1.46076
14782	Q9NZN4	EHD2_HUMAN	No	_TWMVGTK(de)IPNSVIGR_	480	1	YES	NO	4.23673	2.23406
14873	Q9P2E9	RRBP1_HUMAN	No	_K(de)AEGAPNQGR_	211	1	YES	NO	3.54285	1.32276
14887	Q9P2E9	RRBP1_HUMAN	No	_K(de)VEGAPTQGR_	281	1	YES	NO	3.27687	1.84738
14900	Q9P2J5	SYLC_HUMAN	No	_AGSSK(de)YQWGIMK_	155	1	YES	NO	3.63224	1.47295
15036	Q9UHB6	LIMA1_HUMAN	No	_MMFEKGEPTQTK(de)IIR_	210	1	YES	NO	4.19397	1.71107
15534	Q9Y394	DHRS7_HUMAN	No	_EK(de)DIIVIPIDITDTGSHEAATK_	103	1	YES	NO	3.16807	1.42398
15642	Q9Y490	TLN1_HUMAN	No	_EIVAQGK(de)VGAIPANAIDDGQWSQGIISAAR_	2375	1	YES	NO	2.72378	1.31048
15654	Q9Y490	TLN1_HUMAN	No	_QAAASATQTIAAAQHAASTPK(de)ASAGPQPIIVQSCK_	943	1	YES	NO	4.59197	2.25316
3936	P15056	BRAF_HUMAN	Yes	_SIIHRDIK(de)SNNIFIHEDITVK_	578	1	NO	YES	-3.5177	1.71002
15711	Q9Y4K4	M4K5_HUMAN	Yes	_K(de)FAITTK_	609	1	NO	YES	-2.71729	1.34293
2	A0AVT1	UBA6_HUMAN	No	_IAGK(de)IIPAIATTTATVSGIVAIEMIK_	889	1	NO	YES	-2.69393	1.38025
220	O00154	BACH_HUMAN	No	_FEEGK(de)GR_	362	1	NO	YES	-3.50467	1.76565
606	O15067	PUR4_HUMAN	No	_K(de)EFFIQR_	639	1	NO	YES	-3.64899	1.73974
771	O43181	NDUS4_HUMAN	No	_SYGANFSWNK(de)R_	168	1	NO	YES	-4.40183	1.59718
982	O43813	LANC1_HUMAN	No	_K(de)GYGICHGSAGNAYAFITIYNITQDMK_	317	1	NO	YES	-3.98036	1.91497
990	O43837	IDH3B_HUMAN	No	_RK(de)IDIFANVVHVK_	135	1	NO	YES	-2.90429	1.63967
1041	O60343	TBCD4_HUMAN	No	_IQVAHTK(de)IQAIESNIENIITR_	1226	1	NO	YES	-2.84105	1.43335
1123	O60763	USO1_HUMAN	No	_IVK(de)EIEGVITK_	618	1	NO	YES	-2.84696	1.31996
1337	O75390	CISY_HUMAN	No	_GMK(de)GIVYETSVIDPDEGIR_	76	1	NO	YES	-3.28162	1.38338
1390	O75521	ECI2_HUMAN	No	_K(de)NAINTEMYHEIMR_	161	1	NO	YES	-3.43106	1.35328
1416	O75533	SF3B1_HUMAN	No	_NRPISDEEIDAMFPEGYK(de)VIPPPAGYVPIR_	413	1	NO	YES	-3.35313	1.45514
1676	O95139	NDUB6_HUMAN	No	_MGPMEK(de)FWNK_	45	1	NO	YES	-3.13612	1.4222
1701	O95292	VAPB_HUMAN	No	_VEQVISIEPQHEIK(de)FR_	17	1	NO	YES	-3.72896	1.99603
1771	O95573	ACSL3_HUMAN	No	_AFNFGNGIQMIGQK(de)PK_	157	1	NO	YES	-4.67797	2.62753
1781	O95573	ACSL3_HUMAN	No	_TK(de)ADFFEDENGQR_	547	1	NO	YES	-4.15356	1.92034
2256	P05026	AT1B1_HUMAN	No	_EGKPCIIIK(de)INR_	179	1	NO	YES	-3.71541	1.60601
2537	P07093	GDN_HUMAN	No	_YGVNGVGK(de)IIK_	90	1	NO	YES	-3.21271	1.49759
2668	P07814	SYEP_HUMAN	No	_DNYSPGWK(de)FNHWEIK_	1354	1	NO	YES	-3.09049	1.48248
2737	P07900	HS90A_HUMAN	No	_SITNDWEDHIAVK(de)HFSVEGQIEFR_	327	1	NO	YES	-5.32686	1.7201
2848	P08237	PFKAM_HUMAN	No	_IRPIIK(de)IIAK_	750	1	NO	YES	-3.10683	1.56872
2850	P08237	PFKAM_HUMAN	No	_NFATK(de)MGAK_	678	1	NO	YES	-3.30881	1.66545
2873	P08238	HS90B_HUMAN	No	_SITNDWEDHIAVK(de)HFSVEGQIEFR_	319	1	NO	YES	-5.32686	1.7201
2977	P09104	ENOG_HUMAN	No	_AVEEK(de)ACNCIIIK_	335	1	NO	YES	-4.30802	1.48722
3238	P10606	COX5B_HUMAN	No	_K(de)GIDPYNVIAPK_	57	1	NO	YES	-3.82936	1.43681
3407	P11310	ACADM_HUMAN	No	_VAMGAFDK(de)TRPVVAAGAVGIAQR_	279	1	NO	YES	-4.23078	1.83155
3425	P11387	TOP1_HUMAN	No	_VEHINIHPEIDGQEYVVEFDFIGK(de)DSIR_	532	1	NO	YES	-3.42729	1.40773
3456	P11586	C1TC_HUMAN	No	_CTHWAEGGK(de)GAIAIAQAVQR_	793	1	NO	YES	-3.45137	1.4468
3624	P12956	XRCC6_HUMAN	No	_IGSIVDEFK(de)EIVYPPDYNPEGK_	526	1	NO	YES	-2.75254	1.35553
3647	P13010	XRCC5_HUMAN	No	_SQIPISK(de)IK_	532	1	NO	YES	-5.72143	1.99496
3821	P14324	FPPS_HUMAN	No	_IKEVIEYNAIGGK(de)YNR_	123	1	NO	YES	-4.3656	1.93316
4073	P16403	H12_HUMAN	No	_SAAK(de)AVKPK_	191	1	NO	YES	-5.45061	1.86828
4111	P16949	STMN1_HUMAN	No	_MAEEK(de)ITHK_	100	2	NO	YES	-3.09409	1.3399
4348	P18754	RCC1_HUMAN	No	_VVISVSSGGQHTVIIVK(de)DKEQS_	416	1	NO	YES	-3.45968	1.45368
4465	P20340	RAB6A_HUMAN	No	_AK(de)EINVMFIETSAK_	146	1	NO	YES	-2.83662	1.35214
4652	P21912	SDHB_HUMAN	No	_IAK(de)IQDPFSIYR_	233	1	NO	YES	-3.00222	1.32387
4857	P23381	SYWC_HUMAN	No	_IGYPKPAIIHSTFFPAIQGAQTK(de)M(ox)SASDPNSSIFITDTAK_	349	1	NO	YES	-5.65271	1.71897
4982	P25205	MCM3_HUMAN	No	_K(de)GGYTSGTFR_	248	1	NO	YES	-2.8704	1.59948
5157	P26640	SYVC_HUMAN	No	_IETMIGDVAVAVHPK(de)DTR_	552	1	NO	YES	-4.64608	2.03228
5375	P29401	TKT_HUMAN	No	_QAFTDVATGSIGQGIGAACGMAYTGK(de)YFDKASYR_	140	1	NO	YES	-4.11222	1.85853
5649	P31939	PUR9_HUMAN	No	_IAGDK(de)ANYWWIR_	461	1	NO	YES	-3.1832	1.44771
5754	P33176	KINH_HUMAN	No	_VHK(de)QIVR_	847	3	NO	YES	-2.72234	1.39406
5839	P34932	HSP74_HUMAN	No	_QVYVDKIAEIK(de)NIGQPIK_	679	1	NO	YES	-3.95685	1.33655
6023	P35580	MYH10_HUMAN	No	_AAANK(de)IVR_	1842	1	NO	YES	-4.91252	2.34404
6031	P35580	MYH10_HUMAN	No	_AMVNKDDIQK(de)MNPPK_	78	1	NO	YES	-4.11757	2.3612
6037	P35580	MYH10_HUMAN	No	_K(de)IVWIPSER_	34	1	NO	YES	-3.53706	1.71621
6044	P35580	MYH10_HUMAN	No	_EVSTIK(de)NR_	1925	1	NO	YES	-3.96578	2.08993
6048	P35580	MYH10_HUMAN	No	_NNAIK(de)VVR_	1111	1	NO	YES	-3.45783	2.31987
6050	P35580	MYH10_HUMAN	No	_HATAIEEISEQIEQAK(de)R_	1216	1	NO	YES	-3.15824	1.56095
6054	P35580	MYH10_HUMAN	No	_IGQSK(de)IFFR_	767;767	2	NO	YES	-4.57087	2.22511
6055	P35580	MYH10_HUMAN	No	_IIIK(de)QVR_	1596	1	NO	YES	-4.5498	1.66853
6056	P35580	MYH10_HUMAN	No	_IIK(de)DAEAISQRIEEK_	1399	1	NO	YES	-4.0172	1.97864
6069	P35580	MYH10_HUMAN	No	_K(de)IDGETTDIQDQIAEIQAQIDEIKIQIAK_	1059	1	NO	YES	-3.58901	1.4303
6073	P35580	MYH10_HUMAN	No	_K(de)MQAHIQDIEEQIDEEEGAR_	947	1	NO	YES	-3.52301	1.45045
6076	P35580	MYH10_HUMAN	No	_K(de)TTIQVDTINAEIAAER_	1761	1	NO	YES	-3.26249	1.31175
6089	P35580	MYH10_HUMAN	No	_SAAQK(de)SDNAR_	1782	1	NO	YES	-5.54217	3.5065
6092	P35580	MYH10_HUMAN	No	_VFTK(de)VKPIIQVTR_	840	1	NO	YES	-3.69165	1.65681
6138	P35749	MYH11_HUMAN	No	_AQTK(de)EQADFAVEAIAK_	414	1	NO	YES	-4.26257	2.02616
6257	P37235	HPCL1_HUMAN	No	_GAK(de)SDPSIVR_	174	3	NO	YES	-3.68768	1.80469
6466	P40925	MDHC_HUMAN	No	_AQIAIK(de)IGVTANDVK_	170	1	NO	YES	-3.12831	1.34524
6648	P42704	LPPRC_HUMAN	No	_CVANNQVETIEK(de)IVEITQK_	941	1	NO	YES	-2.93312	1.45381
6672	P42704	LPPRC_HUMAN	No	_K(de)VIEEQIEPAVEK_	1224	1	NO	YES	-3.20786	1.61932
6742	P43304	GPDM_HUMAN	No	_K(de)FIYYEMGYK_	597	1	NO	YES	-3.22944	1.38068
6743	P43304	GPDM_HUMAN	No	_MVK(de)EAIHER_	138	1	NO	YES	-2.97135	3.12756
7042	P47895	AL1A3_HUMAN	No	_IAFTGSTEVGK(de)IVK_	263	1	NO	YES	-3.75196	1.35989
7055	P47895	AL1A3_HUMAN	No	_YFAGWADKIQGK(de)TIPTDDNVVCFTR_	154	1	NO	YES	-3.69664	1.36844
7246	P49327	FAS_HUMAN	No	_FDASFFGVHPK(de)QAHTMDPQIR_	70	1	NO	YES	-5.72848	2.73802
7374	P49736	MCM2_HUMAN	No	_YIIYAK(de)ER_	728	1	NO	YES	-3.83327	1.9309
7453	P50395	GDIB_HUMAN	No	_FK(de)IPGSPPESMGR_	57	1	NO	YES	-3.94055	1.39474
7652	P51606	RENBP_HUMAN	No	_DGRPVK(de)VQR_	126	1	NO	YES	-2.72637	1.50379
8169	P55327	TPD52_HUMAN	No	_QNIAK(de)GWQDVTATSAYKK_	125	1	NO	YES	-3.66834	1.72516
8180	P55786	PSA_HUMAN	No	_GIVIGK(de)IGK_	712	1	NO	YES	-2.71698	1.34247
8239	P56556	NDUA6_HUMAN	No	_QATSTASTFVK(de)PIFSR_	44	1	NO	YES	-3.09787	1.44771
8241	P56693	SOX10_HUMAN	No	_KDHPDYK(de)YQPR_	172	3	NO	YES	-2.91782	1.79826
8243	P56693	SOX10_HUMAN	No	_IINESDK(de)RPFIEEAER_	150	1	NO	YES	-4.55173	1.97551
8251	P57729	RAB38_HUMAN	No	_IIVIGDIGVGK(de)TSIIKR_	22	1	NO	YES	-2.70182	1.37893
8261	P58546	MTPN_HUMAN	No	_NGDIDEVK(de)DYVAKGEDVNR_	19	1	NO	YES	-3.9638	1.68781
8388	P61088	UBE2N_HUMAN	No	_IYHPNVDK(de)IGR_	82	1	NO	YES	-3.59337	1.54961
8411	P61160	ARP2_HUMAN	No	_EK(de)ICYVGYNIEQEQK_	219	1	NO	YES	-4.20375	2.29575
8539	P61916	NPC2_HUMAN	No	_TYSYINKIPVK(de)SEYPSIK_	116	1	NO	YES	-3.14958	1.53716
9192	P78417	GSTO1_HUMAN	No	_EFTK(de)IEEVITNKK_	152	1	NO	YES	-3.15797	1.34095
9337	P83731	RL24_HUMAN	No	_KAK(de)QASK_	119	1	NO	YES	-3.7241	1.37892
9566	Q00796	DHSO_HUMAN	No	_(ac)AAAAK(de)PNNISIVVHGPGDIR_	6	1	NO	YES	-4.10527	1.88095
9567	Q00796	DHSO_HUMAN	No	_GIGIK(de)IMIK_	345	1	NO	YES	-3.41104	2.09224
9588	Q00839	HNRPU_HUMAN	No	_K(de)AIPPEKK_	675	1	NO	YES	-3.03963	1.86103
9672	Q01130	SRSF2_HUMAN	No	_SK(de)SSSVSR_	172	2	NO	YES	-4.41606	2.20279
9793	Q02790	FKBP4_HUMAN	No	_IASHINIAMCHIK(de)IQAFSAAIESCNK_	331	1	NO	YES	-3.2816	1.55097
9818	Q02878	RL6_HUMAN	No	_HQEGEIFDTEKEK(de)YEITEQR_	239	1	NO	YES	-4.67693	1.39697
9845	Q02952	AKA12_HUMAN	No	_VFK(de)FVGFK_	177	1	NO	YES	-5.05026	2.92785
9852	Q02952	AKA12_HUMAN	No	_SSK(de)IVQNIIQTAVDQFVR_	1548	1	NO	YES	-5.52833	4.76148
9975	Q05707	COEA1_HUMAN	No	_AIK(de)YVR_	1117	1	NO	YES	-3.30215	1.4083
10015	Q07021	C1QBP_HUMAN	No	_VEEQEPEITSTPNFVVEVIK(de)NDDGKK_	174	1	NO	YES	-4.65378	1.81551
10071	Q08211	DHX9_HUMAN	No	_IQGEYK(de)YTQVGPDHNR_	199	1	NO	YES	-3.57316	1.40672
10409	Q12905	ILF2_HUMAN	No	_WFEENASQSTVK(de)VIIR_	221	1	NO	YES	-5.16984	2.56101
10505	Q13148	TADBP_HUMAN	No	_FTEYETQVK(de)VMSQR_	160	1	NO	YES	-3.34912	1.97541
10861	Q13813	SPTN1_HUMAN	No	_ITK(de)EAGSVSIR_	1057	1	NO	YES	-3.13196	1.74433
10863	Q13813	SPTN1_HUMAN	No	_KVEDIFITFAKK(de)_	2099	1	NO	YES	-3.53963	1.44035
10935	Q14103	HNRPD_HUMAN	No	_EEWK(de)MFIGGISWDTTKK_	98	1	NO	YES	-3.67163	1.67033
11138	Q14376	GALE_HUMAN	No	_DYIHVVDIAK(de)GHIAAIR_	249	1	NO	YES	-3.12931	1.41797
11142	Q14376	GALE_HUMAN	No	_VNITGTIQIIEIMK(de)AHGVK_	120	1	NO	YES	-2.75311	1.54382
11165	Q14566	MCM6_HUMAN	No	_FVDFQK(de)VR_	205	1	NO	YES	-2.98075	1.57026
11198	Q14683	SMC1A_HUMAN	No	_SGEIAQEYDK(de)R_	170	1	NO	YES	-2.71985	1.43088
11278	Q14919	NC2A_HUMAN	No	_K(de)ACQVTQSR_	52	1	NO	YES	-3.05121	1.64857
11439	Q15061	WDR43_HUMAN	No	_NVNIIK(de)K_	491	1	NO	YES	-2.87577	1.49484
11746	Q15459	SF3A1_HUMAN	No	_VEWAK(de)FQER_	251	1	NO	YES	-3.5766	1.40188
11752	Q15599	NHRF2_HUMAN	No	_K(de)GPQGYGFNIHSDK_	156	1	NO	YES	-3.20267	1.50543
11777	Q15691	MARE1_HUMAN	No	_ITVEDIEK(de)ERDFYFGK_	212	1	NO	YES	-2.93439	1.39415
11917	Q16637	SMN_HUMAN	No	_HAIK(de)NGDICETSGKPK_	55	1	NO	YES	-3.29939	1.38778
11960	Q16666	IF16_HUMAN	No	_SEDTISK(de)MNDFMR_	451	1	NO	YES	-4.25771	2.03703
12031	Q16851	UGPA_HUMAN	No	_GPSVDWGK(de)IQRPPEDSIQPYEK_	77	1	NO	YES	-4.13287	1.49432
12130	Q4VC31	CCD58_HUMAN	No	_IVHEINTTVPTASFAGK(de)IDASQTCK_	46	1	NO	YES	-4.33377	1.99426
12155	Q53H12	AGK_HUMAN	No	_K(de)IQFFCDPR_	403	1	NO	YES	-3.57068	1.31427
12188	Q5JTH9	RRP12_HUMAN	No	_SDITVDAVK(de)IHNEIQSGSIR_	57	1	NO	YES	-4.04692	1.39403
12259	Q5VW32	BROX_HUMAN	No	_IYAK(de)AEAICK_	283	1	NO	YES	-3.8563	1.58576
12364	Q6P2Q9	PRP8_HUMAN	No	_GATVDK(de)TVCKK_	769	1	NO	YES	-2.89397	1.44557
12379	Q6P2Q9	PRP8_HUMAN	No	_K(de)YVNGSTYQR_	218	1	NO	YES	-3.12984	2.14653
12430	Q6UVK1	CSPG4_HUMAN	No	_VSDGIQASPPATIK(de)VVAIRPAIQIHR_	655	1	NO	YES	-3.78031	1.30795
12644	Q86UP2	KTN1_HUMAN	No	_ITDTIVSK(de)QQIEQR_	543	1	NO	YES	-3.83531	1.58463
12690	Q86VP6	CAND1_HUMAN	No	_MIIK(de)IIEDKNGEVQNIAVK_	55	1	NO	YES	-3.87023	1.76967
12832	Q8N766	EMC1_HUMAN	No	_FASIEFSPGSK(de)K_	52	1	NO	YES	-3.32812	1.32629
12877	Q8NBX0	SCPDL_HUMAN	No	_IIDRINK(de)HGIEFSVISSSEV_	416	1	NO	YES	-3.34938	1.32203
13185	Q92841	DDX17_HUMAN	No	_IIQIMEEIMAEK(de)ENK_	417	1	NO	YES	-2.71482	1.3989
13275	Q969G3	SMCE1_HUMAN	No	_K(de)IEAEIIQIEER_	240	1	NO	YES	-3.01896	1.43467
13289	Q969T9	WBP2_HUMAN	No	_K(de)GTVYITPYR_	47	1	NO	YES	-3.90509	1.98185
13293	Q969X5	ERGI1_HUMAN	No	_ITSNPIASHDYIIK(de)IVPTVYEDK_	190	1	NO	YES	-3.53864	1.42173
13421	Q96E39	RMXL1_HUMAN	No	_AIETVFGK(de)YGR_	30	1	NO	YES	-3.03065	1.44132
13433	Q96EP5	DAZP1_HUMAN	No	_K(de)FGVVTEVVMIYDAEK_	135	1	NO	YES	-2.78097	1.45839
13682	Q99497	PARK7_HUMAN	No	_KGIIAAICAGPTAIIAHEIGFGSK(de)VTTHPIAK_	122	1	NO	YES	-4.37637	1.82469
13774	Q99798	ACON_HUMAN	No	_ITGSISGWSSPK(de)DVIIK_	245	1	NO	YES	-2.879	1.54969
13988	Q9BV79	MECR_HUMAN	No	_NFFK(de)DMPQPR_	252	1	NO	YES	-2.85705	1.65539
14015	Q9BWD1	THIC_HUMAN	No	_TGVK(de)IGEMPITDSIICDGITDAFHNCHMGITAENVAKK_	136	1	NO	YES	-4.20107	1.53924
14105	Q9BZZ5	API5_HUMAN	No	_IISGIK(de)SIQTVSGR_	202	1	NO	YES	-3.01753	1.38105
14111	Q9C004	SPY4_HUMAN	No	_IQHPITIIPIDQVK(de)TSHVENDYIDNPSIAITTGPKR_	44	1	NO	YES	-3.57052	1.45045
14112	Q9C004	SPY4_HUMAN	No	_TSHVENDYIDNPSIAITTGPK(de)R_	65	1	NO	YES	-4.29675	1.53196
14158	Q9H0S4	DDX47_HUMAN	No	_NIGFTAIPIHGQMSQSK(de)R_	301	1	NO	YES	-3.55786	1.45986
14209	Q9H3K6	BOLA2_HUMAN	No	_VIVVSAK(de)FEGKPIIQR_	43	1	NO	YES	-3.81792	1.47767
14280	Q9H9B4	SFXN1_HUMAN	No	_AK(de)YIYDSAFHPDTGEK_	72	1	NO	YES	-5.09173	2.02062
14435	Q9NR28	DBLOH_HUMAN	No	_NHIQIVK(de)IQVEEVHQISR_	191	1	NO	YES	-2.98957	1.40455
14522	Q9NSE4	SYIM_HUMAN	No	_SFAK(de)AAIEK_	189	1	NO	YES	-3.77756	1.6066
14673	Q9NYK5	RM39_HUMAN	No	_K(de)SIIAIVDGQPWDMYKPITK_	102	1	NO	YES	-4.54363	1.82624
14832	Q9P258	RCC2_HUMAN	No	_IVK(de)IFDFPGR_	377	1	NO	YES	-3.66838	1.96829
14912	Q9P2J5	SYLC_HUMAN	No	_VIEPYPSK(de)ISGIK_	278	1	NO	YES	-4.00477	1.53505
15027	Q9UGP8	SEC63_HUMAN	No	_IK(de)TIQDIVSIK_	407	1	NO	YES	-3.46208	1.71864
15140	Q9UJU6	DBNL_HUMAN	No	_VGK(de)DSFWAK_	176	1	NO	YES	-2.87379	1.40368
15313	Q9UNZ5	L10K_HUMAN	No	_TAAAASEK(de)NR_	25	1	NO	YES	-3.99422	2.69207
15323	Q9UQ80	PA2G4_HUMAN	No	_VAHSFNCTPIEGMISHQIK(de)QHVIDGEK_	191	1	NO	YES	-4.59039	1.76808
15459	Q9Y2R5	RT17_HUMAN	No	_K(de)TYFAHDAIQQCTVGDIVIIR_	47	1	NO	YES	-4.57273	1.87892
15531	Q9Y383	LC7L2_HUMAN	No	_MDIGECIK(de)VHDIAIR_	61	1	NO	YES	-2.69434	1.31119
15745	Q9Y4W6	AFG32_HUMAN	No	_IIINDAYK(de)R_	710	1	NO	YES	-3.18493	1.47413
15753	Q9Y508	RN114_HUMAN	No	_K(de)NFFISK_	96	1	NO	YES	-2.94951	1.35836
15771	Q9Y5B9	SP16H_HUMAN	No	_GDK(de)VDIIYNNIK_	696	1	NO	YES	-3.23693	1.44197
15806	Q9Y5V0	ZN706_HUMAN	No	_GQQK(de)IQSQQK_	7	1	NO	YES	-2.68293	1.34576
5336	P28482	MK01_HUMAN	Yes	_YIHSANVIHRDIK(de)PSNIIINTTCDIK_	151	2	NO	NO	-0.671061	2.28392
9233	P78527	PRKDC_HUMAN	Yes	_VVIK(de)HIK_	832	1	NO	NO	0.419043	1.69385
9239	P78527	PRKDC_HUMAN	Yes	_HK(de)SIEIFYK_	1186	1	NO	NO	0.537916	1.75139
9259	P78527	PRKDC_HUMAN	Yes	_QGNISSQVPIK(de)R_	3158	1	NO	NO	0.464216	1.77606
9276	P78527	PRKDC_HUMAN	Yes	_NIEK(de)MYER_	3608	1	NO	NO	0.34039	1.73466
10760	Q13555	KCC2G_HUMAN	Yes	_TSTQEYAAK(de)IINTKK_	43	1	NO	NO	2.16796	1.9428
10761	Q13557	KCC2D_HUMAN	Yes	_IPTGQEYAAK(de)IINTKK_	43	1	NO	NO	0.811126	1.8392
45	C9JLW8	F195B_HUMAN	No	_TFKPIDISDIK(de)R_	87	1	NO	NO	-2.57067	1.4985
265	O00203	AP3B1_HUMAN	No	_IYITNSKQTK(de)_	552	2	NO	NO	-2.12159	1.43985
294	O00233	PSMD9_HUMAN	No	_K(de)IGQSESQGPPR_	123	1	NO	NO	0.759728	1.95548
344	O00425	IF2B3_HUMAN	No	_IEIHGKPIEVEHSVPK(de)R_	76	1	NO	NO	1.32577	1.32728
579	O15061	SYNEM_HUMAN	No	_GIQTPVK(de)DAGGGTGR_	601	1	NO	NO	-2.60526	1.42491
855	O43491	E41L2_HUMAN	No	_NFMESTPEPRPNEWEK(de)R_	669	1	NO	NO	-2.63554	1.36615
904	O43707	ACTN4_HUMAN	No	_ASFNHFDK(de)DHGGAIGPEEFK_	779	1	NO	NO	0.557904	1.49371
911	O43707	ACTN4_HUMAN	No	_ETTDTDTADQVIASFK(de)VIAGDKNFITAEEIR_	853	1	NO	NO	0.825183	1.84081
912	O43707	ACTN4_HUMAN	No	_VIAGDK(de)NFITAEEIRR_	859	1	NO	NO	0.986674	1.40854
932	O43707	ACTN4_HUMAN	No	_QK(de)ASIHEAWTDGKEAMIK_	421	1	NO	NO	0.840315	2.11091
1055	O60493	SNX3_HUMAN	No	_SYTPSK(de)IR_	158	1	NO	NO	-0.71321	1.61625
1133	O60814	H2B1K_HUMAN	No	_SAPAPK(de)KGSK_	12;12	3	NO	NO	0.583973	1.3621
1285	O75369	FLNB_HUMAN	No	_HVGNQQYNVTYVVK(de)ER_	2576	1	NO	NO	2.53894	1.40044
1319	O75369	FLNB_HUMAN	No	_VK(de)ESITR_	2096;2141	2	NO	NO	1.34814	2.01317
1548	O75964	ATP5L_HUMAN	No	_NIVEK(de)TPAIVNAAVTYSKPR_	11	1	NO	NO	2.18369	1.35225
1911	P00387	NB5R3_HUMAN	No	_K(de)SNPIIR_	164	1	NO	NO	0.692443	1.45297
1915	P00387	NB5R3_HUMAN	No	_NK(de)HSAR_	228	1	NO	NO	0.902612	1.41717
1917	P00387	NB5R3_HUMAN	No	_TVK(de)SVGMIAGGTGITPMIQVIR_	173	1	NO	NO	1.70512	2.23062
1923	P00441	SODC_HUMAN	No	_(ac)ATK(de)AVCVIKGDGPVQGIINFEQK_	4	1	NO	NO	-1.96001	1.3208
1977	P00846	ATP6_HUMAN	No	_IITTQQWIIK(de)ITSK_	51	1	NO	NO	-1.067	2.87118
2247	P05023	AT1A1_HUMAN	No	_NPK(de)TDKIVNER_	840	1	NO	NO	-1.65259	1.47033
2267	P05114	HMGN1_HUMAN	No	_VSSAEGAAK(de)EEPK_	14	1	NO	NO	0.563817	1.64885
2276	P05141	ADT2_HUMAN	No	_IPK(de)EQGVISFWR_	63;63	2	NO	NO	-0.469057	1.39287
2315	P05388	RLA0_HUMAN	No	_TSFFQAIGITTK(de)ISR_	146	2	NO	NO	-0.367528	1.91185
2405	P06576	ATPB_HUMAN	No	_ADK(de)IAEEHSS_	522	1	NO	NO	-0.439173	1.81733
2511	P06753	TPM3_HUMAN	No	_MEIQEIQIKEAK(de)_	153	1	NO	NO	0.954054	1.53702
2516	P06753	TPM3_HUMAN	No	_SIEAQAEK(de)YSQK_	214	1	NO	NO	1.93341	1.45852
2562	P07195	LDHB_HUMAN	No	_NVNVFK(de)FIIPQIVK_	119	1	NO	NO	-0.615113	1.43843
2565	P07237	PDIA1_HUMAN	No	_IK(de)AEGSEIR_	71	1	NO	NO	0.701493	1.79375
2574	P07237	PDIA1_HUMAN	No	_K(de)EECPAVR_	309	1	NO	NO	0.766682	1.57051
2607	P07355	ANXA2_HUMAN	No	_TK(de)GVDEVTIVNIITNR_	49	2	NO	NO	2.16774	1.36784
2610	P07355	ANXA2_HUMAN	No	_TPAQYDASEIK(de)ASM(ox)K_	115	2	NO	NO	1.7928	1.59449
2614	P07355	ANXA2_HUMAN	No	_KIMVAIAK(de)GR_	176	2	NO	NO	1.96778	1.84017
2615	P07355	ANXA2_HUMAN	No	_SEVDM(ox)IK(de)IR_	302	2	NO	NO	2.14864	1.7503
2620	P07355	ANXA2_HUMAN	No	_(ac)STVHEIICK(de)ISIEGDHSTPPSAYGSVK_	10	2	NO	NO	2.33496	1.69365
2621	P07355	ANXA2_HUMAN	No	_SVPHIQK(de)VFDRYK_	227	2	NO	NO	2.30577	1.50679
2632	P07437	TBB5_HUMAN	No	_M(ox)AVTFIGNSTAIQEIFK(de)R_	379	1	NO	NO	-1.45144	1.42692
2828	P08133	ANXA6_HUMAN	No	_TNEQMHQIVAAYK(de)DAYER_	135	1	NO	NO	2.48661	1.33943
2865	P08238	HS90B_HUMAN	No	_MKETQK(de)SIYYITGESK_	481	1	NO	NO	-0.93695	1.55738
2929	P08670	VIME_HUMAN	No	_QAK(de)QESTEYRR_	313	1	NO	NO	1.0662	1.57818
2931	P08670	VIME_HUMAN	No	_RQVDQITNDK(de)AR_	168	1	NO	NO	0.893238	1.6831
3012	P09429	HMGB1_HUMAN	No	_EMK(de)TYIPPKGETK_	76	1	NO	NO	-0.733526	1.30596
3017	P09429	HMGB1_HUMAN	No	_GK(de)MSSYAFFVQTCREEHK_	12;12	3	NO	NO	-0.44911	1.3636
3020	P09429	HMGB1_HUMAN	No	_WK(de)TM(ox)SAK_	50;50	3	NO	NO	-0.570259	1.47777
3163	P0CG29	GST2_HUMAN	No	_SK(de)EFIQINSIGKIPTIK_	43	2	NO	NO	2.54708	1.32825
3329	P11117	PPAL_HUMAN	No	_IIK(de)FPIGPCPR_	153	1	NO	NO	0.879287	1.75757
3531	P12235	ADT1_HUMAN	No	_AFFK(de)GAWSNVIR_	272	1	NO	NO	-0.747614	1.36399
3542	P12236	ADT3_HUMAN	No	_YK(de)QIFIGGVDKHTQFWR_	96	1	NO	NO	-0.750956	1.65927
3634	P12956	XRCC6_HUMAN	No	_VEAMNK(de)R_	516	1	NO	NO	1.47097	1.49688
3638	P12956	XRCC6_HUMAN	No	_TK(de)AGDIR_	189	1	NO	NO	1.23256	1.33667
3671	P13073	COX41_HUMAN	No	_DHPIPEVAHVK(de)HISASQK_	53	1	NO	NO	-0.408797	1.30135
3844	P14618	KPYM_HUMAN	No	_KGATIK(de)ITIDNAYMEK_	141	1	NO	NO	-0.773379	1.90655
3915	P14866	HNRPL_HUMAN	No	_VFSGK(de)SER_	538	1	NO	NO	0.576325	1.54167
4027	P16070	CD44_HUMAN	No	_FAGVFHVEK(de)NGR_	38	1	NO	NO	1.81217	1.80121
4032	P16070	CD44_HUMAN	No	_YVQK(de)GEYR_	158	1	NO	NO	0.781259	1.35289
4036	P16104	H2AX_HUMAN	No	_KTSATVGPK(de)APSGGK_	128	1	NO	NO	1.42529	1.66794
4097	P16615	AT2A2_HUMAN	No	_SMSVYCTPNK(de)PSR_	502	1	NO	NO	0.298977	1.32114
4282	P18124	RL7_HUMAN	No	_RK(de)IIYEK_	48	3	NO	NO	1.73788	1.64654
4309	P18206	VINC_HUMAN	No	_IIIVAK(de)R_	768	1	NO	NO	0.912618	1.33255
4318	P18206	VINC_HUMAN	No	_VGK(de)ETVQTTEDQIIKR_	59	1	NO	NO	1.07319	1.78344
4415	P19367	HXK1_HUMAN	No	_NIIIDFTKK(de)_	764	1	NO	NO	-0.343153	1.44134
4554	P21333	FLNA_HUMAN	No	_AITQTGGPHVK(de)AR_	1294	1	NO	NO	1.40884	1.70141
4561	P21333	FLNA_HUMAN	No	_SSFTVDCSK(de)AGNNM(ox)IIVGVHGPR_	2584	1	NO	NO	1.28837	1.51592
4563	P21333	FLNA_HUMAN	No	_K(de)IQQNTFTR_	43	1	NO	NO	1.24896	1.45681
4579	P21333	FLNA_HUMAN	No	_VKETADFK(de)VYTK_	504	1	NO	NO	1.65262	1.64902
4588	P21333	FLNA_HUMAN	No	_VTVK(de)GPKGEER_	520	1	NO	NO	1.64641	1.82644
4602	P21333	FLNA_HUMAN	No	_K(de)HNQRPTFR_	92	1	NO	NO	1.5749	2.17439
4614	P21333	FLNA_HUMAN	No	_VGTECGNQK(de)VR_	578	1	NO	NO	1.58365	2.07425
4618	P21333	FLNA_HUMAN	No	_TPCEEIIVK(de)HVGSR_	2607	1	NO	NO	1.42415	1.33056
4619	P21333	FLNA_HUMAN	No	_VRVHGPGIQSGTTNK(de)PNK_	1372	1	NO	NO	1.6564	1.49632
4664	P21980	TGM2_HUMAN	No	_ANHINK(de)IAEKEETGMAMR_	464	1	NO	NO	-2.26582	1.33702
4690	P22090	RS4Y1_HUMAN	No	_PSTGPHK(de)IR_	37;37	2	NO	NO	-0.711542	1.95423
4703	P22102	PUR2_HUMAN	No	_K(de)IQPIAK_	453	1	NO	NO	-0.555452	1.42724
4844	P23368	MAOM_HUMAN	No	_AK(de)IDSYQEPFTHSAPESIPDTFEDAVNIIKPSTIIGVAGAGR_	357	1	NO	NO	-0.69797	1.86139
4847	P23368	MAOM_HUMAN	No	_KIWMFDK(de)YGIIVK_	346	1	NO	NO	-1.4211	1.51188
4947	P24534	EF1B_HUMAN	No	_AK(de)KPAIVAK_	132;188	2	NO	NO	0.616399	2.22197
5058	P26038	MOES_HUMAN	No	_QEAEEAK(de)EAIIQASR_	400	1	NO	NO	0.436637	1.47511
5178	P26641	EF1G_HUMAN	No	_K(de)IDPGSEETQTIVR_	401	1	NO	NO	0.46455	1.69708
5210	P27635	RL10_HUMAN	No	_GPIDK(de)WR_	208	2	NO	NO	-0.490976	1.46965
5249	P27797	CALR_HUMAN	No	_NVIINK(de)DIR_	159	1	NO	NO	0.439964	1.49537
5275	P27816	MAP4_HUMAN	No	_DVK(de)PKPIADAK_	772	1	NO	NO	0.853235	1.63039
5310	P27824	CALX_HUMAN	No	_TGIYEEK(de)HAK_	217	1	NO	NO	0.741837	1.4379
5626	P31930	QCR1_HUMAN	No	_EHTAYYIK(de)AISK_	134	1	NO	NO	0.665243	1.75334
5658	P31942	HNRH3_HUMAN	No	_DK(de)NNMQHR_	255	1	NO	NO	-2.60649	1.32185
5685	P31948	STIP1_HUMAN	No	_EICEK(de)AIEVGRENR_	284	1	NO	NO	-0.755778	1.56543
5741	P32969	RL9_HUMAN	No	_NFIGEK(de)YIRR_	121	1	NO	NO	-0.670777	1.65112
5742	P32969	RL9_HUMAN	No	_TICSHVQNM(ox)IK(de)GVTIGFR_	82	1	NO	NO	-0.668936	1.61937
5774	P33778	H2B1B_HUMAN	No	_KAITK(de)AQK_	21	1	NO	NO	1.2906	2.54664
5777	P33778	H2B1B_HUMAN	No	_SAPAPK(de)KGSK_	12;12	2	NO	NO	0.583973	1.3621
5804	P34897	GLYM_HUMAN	No	_IM(ox)GIDIPDGGHITHGYMSDVK(de)R_	181	1	NO	NO	-1.08096	1.30461
5925	P35579	MYH9_HUMAN	No	_K(de)AGKIDPHIVIDQIR_	679	1	NO	NO	1.36618	1.31118
5928	P35579	MYH9_HUMAN	No	_KK(de)QIVR_	1585	1	NO	NO	0.952601	1.65354
5938	P35579	MYH9_HUMAN	No	_EMEAEIEDERK(de)QR_	1603	1	NO	NO	1.6816	1.929
6001	P35579	MYH9_HUMAN	No	_NTDQASM(ox)PDNTAAQK(de)VSHIIGINVTDFTR_	373	1	NO	NO	1.05807	1.36877
6007	P35579	MYH9_HUMAN	No	_QNK(de)EIK_	1788;1795	2	NO	NO	0.805602	3.2783
6008	P35579	MYH9_HUMAN	No	_RQQQITAMK(de)VIQR_	810;817	2	NO	NO	1.03775	1.51325
6009	P35579	MYH9_HUMAN	No	_QRQEIEK(de)TR_	1048	1	NO	NO	2.23205	1.39322
6012	P35579	MYH9_HUMAN	No	_SHAQK(de)NENAR_	1775	1	NO	NO	1.22897	2.05499
6021	P35579	MYH9_HUMAN	No	_VK(de)VNKDDIQK_	66	1	NO	NO	0.874268	1.49197
6035	P35580	MYH10_HUMAN	No	_IVQEQGSHSK(de)FQKPR_	562	1	NO	NO	-1.35425	1.92409
6042	P35580	MYH10_HUMAN	No	_EIEAEIEDERK(de)QR_	1610	1	NO	NO	-1.47871	1.35167
6049	P35580	MYH10_HUMAN	No	_HADQYKEQMEK(de)ANAR_	1874	1	NO	NO	-2.4403	1.40562
6075	P35580	MYH10_HUMAN	No	_K(de)QQQISAIK_	809	1	NO	NO	-2.38722	1.70291
6122	P35637	FUS_HUMAN	No	_IK(de)GEATVSFDDPPSAK_	334	1	NO	NO	-0.324437	1.44146
6456	P40429	RL13A_HUMAN	No	_IK(de)YIAFIR_	53	1	NO	NO	-0.275996	1.81699
6555	P41250	SYG_HUMAN	No	_IMSDKK(de)CSVEK_	230	1	NO	NO	2.14188	1.42795
6929	P46781	RS9_HUMAN	No	_VKFTIAK(de)IR_	52	1	NO	NO	-0.363581	1.44365
7209	P49207	RL34_HUMAN	No	_RAFIIEEQK(de)IVVK_	101	1	NO	NO	-0.374006	1.53331
7396	P49755	TMEDA_HUMAN	No	_SHIK(de)ITDSAGHIIYSKEDATK_	75	1	NO	NO	0.789724	1.8499
7481	P50454	SERPH_HUMAN	No	_SSK(de)QHYNCEHSK_	151	1	NO	NO	0.662623	1.46241
7611	P51149	RAB7A_HUMAN	No	_DPENFPFVVIGNK(de)IDIENR_	126	1	NO	NO	-0.852442	1.59801
7746	P52272	HNRPM_HUMAN	No	_INEIISNAIK(de)R_	381	1	NO	NO	0.269308	1.86203
7955	P53999	TCP4_HUMAN	No	_EYWMDPEGEMK(de)PGRK_	97	1	NO	NO	0.348041	1.57504
8060	P55036	PSMD4_HUMAN	No	_IISK(de)IHTVQPK_	74	2	NO	NO	-0.247379	1.62536
8221	P56182	RRP1_HUMAN	No	_IYK(de)VIR_	326	1	NO	NO	-0.379406	1.59708
8263	P58876	H2B1D_HUMAN	No	_SAPAPK(de)KGSK_	12	1	NO	NO	0.583973	1.3621
8374	P61026	RAB10_HUMAN	No	_IK(de)TVEIQGK_	49	1	NO	NO	1.83495	1.57703
8522	P61604	CH10_HUMAN	No	_VVIDDK(de)DYFIFRDGDIIGK_	86	1	NO	NO	-0.692986	1.98932
8524	P61619	S61A1_HUMAN	No	_QIK(de)EQQMVMR_	395	2	NO	NO	0.324255	1.47897
8901	P62910	RL32_HUMAN	No	_SYCAEIAHNVSSK(de)NRK_	106	1	NO	NO	-0.4686	1.53233
9326	P82921	RT21_HUMAN	No	_YYEK(de)PCR_	47	1	NO	NO	-0.965673	1.3321
9347	P83881	RL36A_HUMAN	No	_CGK(de)HQPHK_	17;17	2	NO	NO	2.44806	1.49477
9387	P84103	SRSF3_HUMAN	No	_VRVEISNGEK(de)R_	85	1	NO	NO	0.650089	1.39564
9493	Q00577	PURA_HUMAN	No	_RFYIDVK(de)QNAK_	78;51	2	NO	NO	0.633164	1.5043
9522	Q00610	CLH1_HUMAN	No	_VAANAPK(de)GIIR_	389	1	NO	NO	0.40697	1.63208
9573	Q00839	HNRPU_HUMAN	No	_APQCIGK(de)FIEIAAR_	565	1	NO	NO	-0.334063	1.57972
9583	Q00839	HNRPU_HUMAN	No	_GYFEYIEENK(de)YSR_	265	1	NO	NO	-0.473873	2.22379
9634	Q01082	SPTB2_HUMAN	No	_K(de)HNIIASK_	1478	1	NO	NO	-2.44078	1.3689
9737	Q01995	TAGL_HUMAN	No	_VPENPPSMVFK(de)QMEQVAQFIK_	89	1	NO	NO	2.14567	1.33312
9761	Q02318	CP27A_HUMAN	No	_DFAHMPIIK(de)AVIK_	387	1	NO	NO	-2.559	1.41218
9879	Q03252	LMNB2_HUMAN	No	_VK(de)DIESIFHR_	130	1	NO	NO	0.512593	1.63056
9892	Q04637	IF4G1_HUMAN	No	_EFIPEGQDIGAFVAEQK(de)VEYTIGEESEAPGQR_	1421	1	NO	NO	2.29571	1.42277
10022	Q07065	CKAP4_HUMAN	No	_QRGSK(de)GGHGAASPSEK_	10	1	NO	NO	1.15767	1.35705
10023	Q07065	CKAP4_HUMAN	No	_IAIQAITEK(de)IIR_	355	1	NO	NO	0.944313	1.40668
10030	Q07065	CKAP4_HUMAN	No	_QIK(de)SDSHGPKEDGGFR_	381	1	NO	NO	1.23133	3.22545
10031	Q07065	CKAP4_HUMAN	No	_SDSHGPK(de)EDGGFRHSEAFEAIQQK_	388	1	NO	NO	1.38872	2.97667
10184	Q09666	AHNK_HUMAN	No	_MPDIHIK(de)APK_	4125	1	NO	NO	1.34721	1.33542
10190	Q09666	AHNK_HUMAN	No	_MPEMHFK(de)TPK_	1191	1	NO	NO	1.37871	1.62146
10297	Q09666	AHNK_HUMAN	No	_MPK(de)INIK_	1773	1	NO	NO	0.457798	1.49666
10345	Q09666	AHNK_HUMAN	No	_VK(de)TPEMIIQKPK_	489	1	NO	NO	2.38151	1.32442
10491	Q13123	RED_HUMAN	No	_GIDFAIIQK(de)VR_	173	1	NO	NO	-2.13544	1.32714
10523	Q13162	PRDX4_HUMAN	No	_IK(de)YFDKIN_	265	1	NO	NO	0.648282	2.28093
10619	Q13330	MTA1_HUMAN	No	_IK(de)AAEAESK_	343;326	2	NO	NO	-2.29048	1.33192
10839	Q13813	SPTN1_HUMAN	No	_EK(de)EPIAASTNR_	803	1	NO	NO	2.54918	1.30999
10845	Q13813	SPTN1_HUMAN	No	_GIVSSDEIAK(de)DVTGAEAIIER_	1369	1	NO	NO	-2.35204	1.43204
11119	Q14315	FLNC_HUMAN	No	_K(de)IQQNTFTR_	36	1	NO	NO	1.24896	1.45681
11122	Q14315	FLNC_HUMAN	No	_GAGSGEIK(de)VTVKGPK_	510	1	NO	NO	1.57993	1.62705
11217	Q14697	GANAB_HUMAN	No	_K(de)PGINVASDWSIHIR_	930	1	NO	NO	0.957278	2.88501
11220	Q14697	GANAB_HUMAN	No	_TCEESSFCK(de)R_	48	1	NO	NO	0.471633	1.53057
11448	Q15084	PDIA6_HUMAN	No	_KAATAIK(de)DVVK_	73	1	NO	NO	0.536361	1.61454
11570	Q15149	PLEC_HUMAN	No	_K(de)GIVGPEIHDR_	3887	1	NO	NO	1.17017	1.74369
11894	Q16555	DPYL2_HUMAN	No	_TVTPASSAK(de)TSPAK_	520	1	NO	NO	1.26384	1.30389
12147	Q53GQ0	DHB12_HUMAN	No	_SYAEEIAK(de)HGMK_	72	1	NO	NO	0.984135	1.62144
12193	Q5JTV8	TOIP1_HUMAN	No	_QVTGQPQNASFVK(de)R_	334	1	NO	NO	-0.386514	3.3994
12205	Q5QNW6	H2B2F_HUMAN	No	_SAPAPK(de)KGSK_	12;12	2	NO	NO	0.583973	1.3621
12237	Q5T8A7	PPR26_HUMAN	No	_K(de)FIAEK_	843	1	NO	NO	1.97036	1.31965
12616	Q86U42	PABP2_HUMAN	No	_VTIICDK(de)FSGHPK_	207	2	NO	NO	0.412329	1.314
12681	Q86VP6	CAND1_HUMAN	No	_MTSSDK(de)DFR_	20	1	NO	NO	-2.36109	1.47861
12699	Q86W92	LIPB1_HUMAN	No	_K(de)AVESIMAANEEKDR_	310	1	NO	NO	0.879291	1.3608
12701	Q86W92	LIPB1_HUMAN	No	_K(de)MQDTVVIAQGK_	338	1	NO	NO	1.0633	1.6994
12802	Q8N257	H2B3B_HUMAN	No	_SAPAPK(de)KGSK_	12	1	NO	NO	0.583973	1.3621
12933	Q8NHP8	PLBL2_HUMAN	No	_IASDGATWADIFK(de)R_	367	1	NO	NO	2.34825	1.34652
13133	Q92598	HS105_HUMAN	No	_NHAAPFSK(de)VITFIR_	430	1	NO	NO	-0.82804	1.41176
13584	Q96QR8	PURB_HUMAN	No	_FIK(de)IAEVGAGGSK_	60	1	NO	NO	0.831497	1.84465
13633	Q99439	CNN2_HUMAN	No	_IQPGSVPK(de)INR_	74	1	NO	NO	1.71704	1.63551
13638	Q99439	CNN2_HUMAN	No	_IISK(de)YDPQKEAEIR_	25	1	NO	NO	1.61584	1.54564
13735	Q99729	ROAA_HUMAN	No	_FGEVVDCTIK(de)MDPNTGR_	101	1	NO	NO	-0.506739	1.7509
13799	Q99832	TCPH_HUMAN	No	_INAITAASEAACIIVSVDETIK(de)NPR_	521	1	NO	NO	0.716933	1.45118
13833	Q99880	H2B1L_HUMAN	No	_SAPAPK(de)KGSK_	12	1	NO	NO	0.583973	1.3621
13911	Q9BRA2	TXD17_HUMAN	No	_VTAVPTIIK(de)YGTPQK_	98	1	NO	NO	-2.56116	1.31635
14005	Q9BVP2	GNL3_HUMAN	No	_K(de)IVIIINK_	172	1	NO	NO	-0.589422	2.1701
14012	Q9BW91	NUDT9_HUMAN	No	_HIIQFVAIK(de)R_	203	1	NO	NO	-2.65708	1.51624
14090	Q9BZE4	NOG1_HUMAN	No	_ITVVPSAK(de)DFIDITISK_	16	1	NO	NO	-2.65486	2.04494
14170	Q9H173	SIL1_HUMAN	No	_FK(de)EGAEMESSKEDK_	139	1	NO	NO	2.09882	2.15369
14171	Q9H173	SIL1_HUMAN	No	_RIDINTNTYTSQDIK(de)SAIAK_	132	1	NO	NO	1.01228	1.62955
14309	Q9HB71	CYBP_HUMAN	No	_K(de)AEIIDNEKPAAVVAPITTGYTVK_	51	1	NO	NO	-1.05426	1.33758
14339	Q9HD33	RM47_HUMAN	No	_FK(de)QWVIPWHINK_	182	1	NO	NO	-2.60952	1.55999
14393	Q9NQC3	RTN4_HUMAN	No	_IQAK(de)IPGIKR_	1183	1	NO	NO	0.861414	1.31851
14469	Q9NR45	SIAS_HUMAN	No	_SVVAK(de)VKIPEGTIITMDMITVK_	298	1	NO	NO	2.58651	1.39986
14540	Q9NTK5	OLA1_HUMAN	No	_IGIVGIPNVGK(de)STFFNVITNSQASAENFPFCTIDPNESR_	35	1	NO	NO	0.897961	1.63024
14645	Q9NXF1	TEX10_HUMAN	No	_TIIIK(de)FFSK_	525	1	NO	NO	-2.43411	2.26385
14661	Q9NYF8	BCLF1_HUMAN	No	_IK(de)MIASDSHRPEVK_	536	1	NO	NO	0.916598	1.43093
14676	Q9NYL4	FKB11_HUMAN	No	_AIIPSHIAYGK(de)R_	121	1	NO	NO	0.754948	1.77379
14883	Q9P2E9	RRBP1_HUMAN	No	_KTEGAQGK(de)K_	528	1	NO	NO	1.0106	1.39466
14968	Q9UBT2	SAE2_HUMAN	No	_K(de)ISEFGIR_	505	1	NO	NO	-2.33421	1.33896
15341	Q9UQE7	SMC3_HUMAN	No	_YQTISIK(de)QIFR_	963	1	NO	NO	-2.59266	1.52965
15346	Q9Y224	CN166_HUMAN	No	_FFEK(de)YIR_	62	1	NO	NO	-0.359706	2.02427
15549	Q9Y3A6	TMED5_HUMAN	No	_ISK(de)SGHIQTIIR_	169	1	NO	NO	2.31543	1.42877
15629	Q9Y490	TLN1_HUMAN	No	_AEASQIGHK(de)VSQMAQYFEPITIAAVGAASK_	1730	1	NO	NO	0.701214	1.48912
15655	Q9Y490	TLN1_HUMAN	No	_MVEAAK(de)GAAAHPDSEEQQQR_	875	1	NO	NO	0.906779	1.62725
15694	Q9Y4G6	TLN2_HUMAN	No	_IISSAK(de)QVAASTAQIIVACK_	2430	1	NO	NO	0.994197	2.38864
15716	Q9Y4L1	HYOU1_HUMAN	No	_NINADEAAAMGAVYQAAAISKAFK(de)_	431	1	NO	NO	0.662926	1.46474
15718	Q9Y4L1	HYOU1_HUMAN	No	_AMAK(de)IIR_	308	1	NO	NO	0.583333	1.44897
15721	Q9Y4L1	HYOU1_HUMAN	No	_EVEEEPGIHSIK(de)HNKR_	463	1	NO	NO	1.83356	1.39286
15728	Q9Y4L1	HYOU1_HUMAN	No	_K(de)ICQGIFFRVEER_	803	1	NO	NO	0.779846	1.40871
15849	Q9Y696	CLIC4_HUMAN	No	_YIK(de)ISPK_	106	1	NO	NO	0.884984	1.32412

## Sheet: Supp. Table 2C
Supplementary Table2C: List of 265 filtered DBT-peptides(fold change > + 2 S.D. away from the mean; p-value <0.05). For simplicity, only the leading protein mapping to the peptide is shown and the total proteins containg the DBT-peptide is listed in separate column.
id	Representative Protein	Uniprot ID	Kinase	DBT-ATP Sequence	Modification Sites	Shared Proteins	Sig. UP Resistant Group	Sig. UP Naïve Group	fold change(Res-Naive)	`-log10(p-value)
3936	P15056	BRAF_HUMAN	Yes	_SIIHRDIK(de)SNNIFIHEDITVK_	578	1	NO	YES	-3.5177	1.71002
15711	Q9Y4K4	M4K5_HUMAN	Yes	_K(de)FAITTK_	609	1	NO	YES	-2.71729	1.34293
2	A0AVT1	UBA6_HUMAN	No	_IAGK(de)IIPAIATTTATVSGIVAIEMIK_	889	1	NO	YES	-2.69393	1.38025
220	O00154	BACH_HUMAN	No	_FEEGK(de)GR_	362	1	NO	YES	-3.50467	1.76565
606	O15067	PUR4_HUMAN	No	_K(de)EFFIQR_	639	1	NO	YES	-3.64899	1.73974
771	O43181	NDUS4_HUMAN	No	_SYGANFSWNK(de)R_	168	1	NO	YES	-4.40183	1.59718
982	O43813	LANC1_HUMAN	No	_K(de)GYGICHGSAGNAYAFITIYNITQDMK_	317	1	NO	YES	-3.98036	1.91497
990	O43837	IDH3B_HUMAN	No	_RK(de)IDIFANVVHVK_	135	1	NO	YES	-2.90429	1.63967
1041	O60343	TBCD4_HUMAN	No	_IQVAHTK(de)IQAIESNIENIITR_	1226	1	NO	YES	-2.84105	1.43335
1123	O60763	USO1_HUMAN	No	_IVK(de)EIEGVITK_	618	1	NO	YES	-2.84696	1.31996
1337	O75390	CISY_HUMAN	No	_GMK(de)GIVYETSVIDPDEGIR_	76	1	NO	YES	-3.28162	1.38338
1390	O75521	ECI2_HUMAN	No	_K(de)NAINTEMYHEIMR_	161	1	NO	YES	-3.43106	1.35328
1416	O75533	SF3B1_HUMAN	No	_NRPISDEEIDAMFPEGYK(de)VIPPPAGYVPIR_	413	1	NO	YES	-3.35313	1.45514
1676	O95139	NDUB6_HUMAN	No	_MGPMEK(de)FWNK_	45	1	NO	YES	-3.13612	1.4222
1701	O95292	VAPB_HUMAN	No	_VEQVISIEPQHEIK(de)FR_	17	1	NO	YES	-3.72896	1.99603
1771	O95573	ACSL3_HUMAN	No	_AFNFGNGIQMIGQK(de)PK_	157	1	NO	YES	-4.67797	2.62753
1781	O95573	ACSL3_HUMAN	No	_TK(de)ADFFEDENGQR_	547	1	NO	YES	-4.15356	1.92034
2256	P05026	AT1B1_HUMAN	No	_EGKPCIIIK(de)INR_	179	1	NO	YES	-3.71541	1.60601
2537	P07093	GDN_HUMAN	No	_YGVNGVGK(de)IIK_	90	1	NO	YES	-3.21271	1.49759
2668	P07814	SYEP_HUMAN	No	_DNYSPGWK(de)FNHWEIK_	1354	1	NO	YES	-3.09049	1.48248
2737	P07900	HS90A_HUMAN	No	_SITNDWEDHIAVK(de)HFSVEGQIEFR_	327	1	NO	YES	-5.32686	1.7201
2848	P08237	PFKAM_HUMAN	No	_IRPIIK(de)IIAK_	750	1	NO	YES	-3.10683	1.56872
2850	P08237	PFKAM_HUMAN	No	_NFATK(de)MGAK_	678	1	NO	YES	-3.30881	1.66545
2873	P08238	HS90B_HUMAN	No	_SITNDWEDHIAVK(de)HFSVEGQIEFR_	319	1	NO	YES	-5.32686	1.7201
2977	P09104	ENOG_HUMAN	No	_AVEEK(de)ACNCIIIK_	335	1	NO	YES	-4.30802	1.48722
3238	P10606	COX5B_HUMAN	No	_K(de)GIDPYNVIAPK_	57	1	NO	YES	-3.82936	1.43681
3407	P11310	ACADM_HUMAN	No	_VAMGAFDK(de)TRPVVAAGAVGIAQR_	279	1	NO	YES	-4.23078	1.83155
3425	P11387	TOP1_HUMAN	No	_VEHINIHPEIDGQEYVVEFDFIGK(de)DSIR_	532	1	NO	YES	-3.42729	1.40773
3456	P11586	C1TC_HUMAN	No	_CTHWAEGGK(de)GAIAIAQAVQR_	793	1	NO	YES	-3.45137	1.4468
3624	P12956	XRCC6_HUMAN	No	_IGSIVDEFK(de)EIVYPPDYNPEGK_	526	1	NO	YES	-2.75254	1.35553
3647	P13010	XRCC5_HUMAN	No	_SQIPISK(de)IK_	532	1	NO	YES	-5.72143	1.99496
3821	P14324	FPPS_HUMAN	No	_IKEVIEYNAIGGK(de)YNR_	123	1	NO	YES	-4.3656	1.93316
4073	P16403	H12_HUMAN	No	_SAAK(de)AVKPK_	191	1	NO	YES	-5.45061	1.86828
4111	P16949	STMN1_HUMAN	No	_MAEEK(de)ITHK_	100	2	NO	YES	-3.09409	1.3399
4348	P18754	RCC1_HUMAN	No	_VVISVSSGGQHTVIIVK(de)DKEQS_	416	1	NO	YES	-3.45968	1.45368
4465	P20340	RAB6A_HUMAN	No	_AK(de)EINVMFIETSAK_	146	1	NO	YES	-2.83662	1.35214
4652	P21912	SDHB_HUMAN	No	_IAK(de)IQDPFSIYR_	233	1	NO	YES	-3.00222	1.32387
4857	P23381	SYWC_HUMAN	No	_IGYPKPAIIHSTFFPAIQGAQTK(de)M(ox)SASDPNSSIFITDTAK_	349	1	NO	YES	-5.65271	1.71897
4982	P25205	MCM3_HUMAN	No	_K(de)GGYTSGTFR_	248	1	NO	YES	-2.8704	1.59948
5157	P26640	SYVC_HUMAN	No	_IETMIGDVAVAVHPK(de)DTR_	552	1	NO	YES	-4.64608	2.03228
5375	P29401	TKT_HUMAN	No	_QAFTDVATGSIGQGIGAACGMAYTGK(de)YFDKASYR_	140	1	NO	YES	-4.11222	1.85853
5649	P31939	PUR9_HUMAN	No	_IAGDK(de)ANYWWIR_	461	1	NO	YES	-3.1832	1.44771
5754	P33176	KINH_HUMAN	No	_VHK(de)QIVR_	847	3	NO	YES	-2.72234	1.39406
5839	P34932	HSP74_HUMAN	No	_QVYVDKIAEIK(de)NIGQPIK_	679	1	NO	YES	-3.95685	1.33655
6023	P35580	MYH10_HUMAN	No	_AAANK(de)IVR_	1842	1	NO	YES	-4.91252	2.34404
6031	P35580	MYH10_HUMAN	No	_AMVNKDDIQK(de)MNPPK_	78	1	NO	YES	-4.11757	2.3612
6037	P35580	MYH10_HUMAN	No	_K(de)IVWIPSER_	34	1	NO	YES	-3.53706	1.71621
6044	P35580	MYH10_HUMAN	No	_EVSTIK(de)NR_	1925	1	NO	YES	-3.96578	2.08993
6048	P35580	MYH10_HUMAN	No	_NNAIK(de)VVR_	1111	1	NO	YES	-3.45783	2.31987
6050	P35580	MYH10_HUMAN	No	_HATAIEEISEQIEQAK(de)R_	1216	1	NO	YES	-3.15824	1.56095
6054	P35580	MYH10_HUMAN	No	_IGQSK(de)IFFR_	767;767	2	NO	YES	-4.57087	2.22511
6055	P35580	MYH10_HUMAN	No	_IIIK(de)QVR_	1596	1	NO	YES	-4.5498	1.66853
6056	P35580	MYH10_HUMAN	No	_IIK(de)DAEAISQRIEEK_	1399	1	NO	YES	-4.0172	1.97864
6069	P35580	MYH10_HUMAN	No	_K(de)IDGETTDIQDQIAEIQAQIDEIKIQIAK_	1059	1	NO	YES	-3.58901	1.4303
6073	P35580	MYH10_HUMAN	No	_K(de)MQAHIQDIEEQIDEEEGAR_	947	1	NO	YES	-3.52301	1.45045
6076	P35580	MYH10_HUMAN	No	_K(de)TTIQVDTINAEIAAER_	1761	1	NO	YES	-3.26249	1.31175
6089	P35580	MYH10_HUMAN	No	_SAAQK(de)SDNAR_	1782	1	NO	YES	-5.54217	3.5065
6092	P35580	MYH10_HUMAN	No	_VFTK(de)VKPIIQVTR_	840	1	NO	YES	-3.69165	1.65681
6138	P35749	MYH11_HUMAN	No	_AQTK(de)EQADFAVEAIAK_	414	1	NO	YES	-4.26257	2.02616
6257	P37235	HPCL1_HUMAN	No	_GAK(de)SDPSIVR_	174	3	NO	YES	-3.68768	1.80469
6466	P40925	MDHC_HUMAN	No	_AQIAIK(de)IGVTANDVK_	170	1	NO	YES	-3.12831	1.34524
6648	P42704	LPPRC_HUMAN	No	_CVANNQVETIEK(de)IVEITQK_	941	1	NO	YES	-2.93312	1.45381
6672	P42704	LPPRC_HUMAN	No	_K(de)VIEEQIEPAVEK_	1224	1	NO	YES	-3.20786	1.61932
6742	P43304	GPDM_HUMAN	No	_K(de)FIYYEMGYK_	597	1	NO	YES	-3.22944	1.38068
6743	P43304	GPDM_HUMAN	No	_MVK(de)EAIHER_	138	1	NO	YES	-2.97135	3.12756
7042	P47895	AL1A3_HUMAN	No	_IAFTGSTEVGK(de)IVK_	263	1	NO	YES	-3.75196	1.35989
7055	P47895	AL1A3_HUMAN	No	_YFAGWADKIQGK(de)TIPTDDNVVCFTR_	154	1	NO	YES	-3.69664	1.36844
7246	P49327	FAS_HUMAN	No	_FDASFFGVHPK(de)QAHTMDPQIR_	70	1	NO	YES	-5.72848	2.73802
7374	P49736	MCM2_HUMAN	No	_YIIYAK(de)ER_	728	1	NO	YES	-3.83327	1.9309
7453	P50395	GDIB_HUMAN	No	_FK(de)IPGSPPESMGR_	57	1	NO	YES	-3.94055	1.39474
7652	P51606	RENBP_HUMAN	No	_DGRPVK(de)VQR_	126	1	NO	YES	-2.72637	1.50379
8169	P55327	TPD52_HUMAN	No	_QNIAK(de)GWQDVTATSAYKK_	125	1	NO	YES	-3.66834	1.72516
8180	P55786	PSA_HUMAN	No	_GIVIGK(de)IGK_	712	1	NO	YES	-2.71698	1.34247
8239	P56556	NDUA6_HUMAN	No	_QATSTASTFVK(de)PIFSR_	44	1	NO	YES	-3.09787	1.44771
8241	P56693	SOX10_HUMAN	No	_KDHPDYK(de)YQPR_	172	3	NO	YES	-2.91782	1.79826
8243	P56693	SOX10_HUMAN	No	_IINESDK(de)RPFIEEAER_	150	1	NO	YES	-4.55173	1.97551
8251	P57729	RAB38_HUMAN	No	_IIVIGDIGVGK(de)TSIIKR_	22	1	NO	YES	-2.70182	1.37893
8261	P58546	MTPN_HUMAN	No	_NGDIDEVK(de)DYVAKGEDVNR_	19	1	NO	YES	-3.9638	1.68781
8388	P61088	UBE2N_HUMAN	No	_IYHPNVDK(de)IGR_	82	1	NO	YES	-3.59337	1.54961
8411	P61160	ARP2_HUMAN	No	_EK(de)ICYVGYNIEQEQK_	219	1	NO	YES	-4.20375	2.29575
8539	P61916	NPC2_HUMAN	No	_TYSYINKIPVK(de)SEYPSIK_	116	1	NO	YES	-3.14958	1.53716
9192	P78417	GSTO1_HUMAN	No	_EFTK(de)IEEVITNKK_	152	1	NO	YES	-3.15797	1.34095
9337	P83731	RL24_HUMAN	No	_KAK(de)QASK_	119	1	NO	YES	-3.7241	1.37892
9566	Q00796	DHSO_HUMAN	No	_(ac)AAAAK(de)PNNISIVVHGPGDIR_	6	1	NO	YES	-4.10527	1.88095
9567	Q00796	DHSO_HUMAN	No	_GIGIK(de)IMIK_	345	1	NO	YES	-3.41104	2.09224
9588	Q00839	HNRPU_HUMAN	No	_K(de)AIPPEKK_	675	1	NO	YES	-3.03963	1.86103
9672	Q01130	SRSF2_HUMAN	No	_SK(de)SSSVSR_	172	2	NO	YES	-4.41606	2.20279
9793	Q02790	FKBP4_HUMAN	No	_IASHINIAMCHIK(de)IQAFSAAIESCNK_	331	1	NO	YES	-3.2816	1.55097
9818	Q02878	RL6_HUMAN	No	_HQEGEIFDTEKEK(de)YEITEQR_	239	1	NO	YES	-4.67693	1.39697
9845	Q02952	AKA12_HUMAN	No	_VFK(de)FVGFK_	177	1	NO	YES	-5.05026	2.92785
9852	Q02952	AKA12_HUMAN	No	_SSK(de)IVQNIIQTAVDQFVR_	1548	1	NO	YES	-5.52833	4.76148
9975	Q05707	COEA1_HUMAN	No	_AIK(de)YVR_	1117	1	NO	YES	-3.30215	1.4083
10015	Q07021	C1QBP_HUMAN	No	_VEEQEPEITSTPNFVVEVIK(de)NDDGKK_	174	1	NO	YES	-4.65378	1.81551
10071	Q08211	DHX9_HUMAN	No	_IQGEYK(de)YTQVGPDHNR_	199	1	NO	YES	-3.57316	1.40672
10409	Q12905	ILF2_HUMAN	No	_WFEENASQSTVK(de)VIIR_	221	1	NO	YES	-5.16984	2.56101
10505	Q13148	TADBP_HUMAN	No	_FTEYETQVK(de)VMSQR_	160	1	NO	YES	-3.34912	1.97541
10861	Q13813	SPTN1_HUMAN	No	_ITK(de)EAGSVSIR_	1057	1	NO	YES	-3.13196	1.74433
10863	Q13813	SPTN1_HUMAN	No	_KVEDIFITFAKK(de)_	2099	1	NO	YES	-3.53963	1.44035
10935	Q14103	HNRPD_HUMAN	No	_EEWK(de)MFIGGISWDTTKK_	98	1	NO	YES	-3.67163	1.67033
11138	Q14376	GALE_HUMAN	No	_DYIHVVDIAK(de)GHIAAIR_	249	1	NO	YES	-3.12931	1.41797
11142	Q14376	GALE_HUMAN	No	_VNITGTIQIIEIMK(de)AHGVK_	120	1	NO	YES	-2.75311	1.54382
11165	Q14566	MCM6_HUMAN	No	_FVDFQK(de)VR_	205	1	NO	YES	-2.98075	1.57026
11198	Q14683	SMC1A_HUMAN	No	_SGEIAQEYDK(de)R_	170	1	NO	YES	-2.71985	1.43088
11278	Q14919	NC2A_HUMAN	No	_K(de)ACQVTQSR_	52	1	NO	YES	-3.05121	1.64857
11439	Q15061	WDR43_HUMAN	No	_NVNIIK(de)K_	491	1	NO	YES	-2.87577	1.49484
11746	Q15459	SF3A1_HUMAN	No	_VEWAK(de)FQER_	251	1	NO	YES	-3.5766	1.40188
11752	Q15599	NHRF2_HUMAN	No	_K(de)GPQGYGFNIHSDK_	156	1	NO	YES	-3.20267	1.50543
11777	Q15691	MARE1_HUMAN	No	_ITVEDIEK(de)ERDFYFGK_	212	1	NO	YES	-2.93439	1.39415
11917	Q16637	SMN_HUMAN	No	_HAIK(de)NGDICETSGKPK_	55	1	NO	YES	-3.29939	1.38778
11960	Q16666	IF16_HUMAN	No	_SEDTISK(de)MNDFMR_	451	1	NO	YES	-4.25771	2.03703
12031	Q16851	UGPA_HUMAN	No	_GPSVDWGK(de)IQRPPEDSIQPYEK_	77	1	NO	YES	-4.13287	1.49432
12130	Q4VC31	CCD58_HUMAN	No	_IVHEINTTVPTASFAGK(de)IDASQTCK_	46	1	NO	YES	-4.33377	1.99426
12155	Q53H12	AGK_HUMAN	No	_K(de)IQFFCDPR_	403	1	NO	YES	-3.57068	1.31427
12188	Q5JTH9	RRP12_HUMAN	No	_SDITVDAVK(de)IHNEIQSGSIR_	57	1	NO	YES	-4.04692	1.39403
12259	Q5VW32	BROX_HUMAN	No	_IYAK(de)AEAICK_	283	1	NO	YES	-3.8563	1.58576
12364	Q6P2Q9	PRP8_HUMAN	No	_GATVDK(de)TVCKK_	769	1	NO	YES	-2.89397	1.44557
12379	Q6P2Q9	PRP8_HUMAN	No	_K(de)YVNGSTYQR_	218	1	NO	YES	-3.12984	2.14653
12430	Q6UVK1	CSPG4_HUMAN	No	_VSDGIQASPPATIK(de)VVAIRPAIQIHR_	655	1	NO	YES	-3.78031	1.30795
12644	Q86UP2	KTN1_HUMAN	No	_ITDTIVSK(de)QQIEQR_	543	1	NO	YES	-3.83531	1.58463
12690	Q86VP6	CAND1_HUMAN	No	_MIIK(de)IIEDKNGEVQNIAVK_	55	1	NO	YES	-3.87023	1.76967
12832	Q8N766	EMC1_HUMAN	No	_FASIEFSPGSK(de)K_	52	1	NO	YES	-3.32812	1.32629
12877	Q8NBX0	SCPDL_HUMAN	No	_IIDRINK(de)HGIEFSVISSSEV_	416	1	NO	YES	-3.34938	1.32203
13185	Q92841	DDX17_HUMAN	No	_IIQIMEEIMAEK(de)ENK_	417	1	NO	YES	-2.71482	1.3989
13275	Q969G3	SMCE1_HUMAN	No	_K(de)IEAEIIQIEER_	240	1	NO	YES	-3.01896	1.43467
13289	Q969T9	WBP2_HUMAN	No	_K(de)GTVYITPYR_	47	1	NO	YES	-3.90509	1.98185
13293	Q969X5	ERGI1_HUMAN	No	_ITSNPIASHDYIIK(de)IVPTVYEDK_	190	1	NO	YES	-3.53864	1.42173
13421	Q96E39	RMXL1_HUMAN	No	_AIETVFGK(de)YGR_	30	1	NO	YES	-3.03065	1.44132
13433	Q96EP5	DAZP1_HUMAN	No	_K(de)FGVVTEVVMIYDAEK_	135	1	NO	YES	-2.78097	1.45839
13682	Q99497	PARK7_HUMAN	No	_KGIIAAICAGPTAIIAHEIGFGSK(de)VTTHPIAK_	122	1	NO	YES	-4.37637	1.82469
13774	Q99798	ACON_HUMAN	No	_ITGSISGWSSPK(de)DVIIK_	245	1	NO	YES	-2.879	1.54969
13988	Q9BV79	MECR_HUMAN	No	_NFFK(de)DMPQPR_	252	1	NO	YES	-2.85705	1.65539
14015	Q9BWD1	THIC_HUMAN	No	_TGVK(de)IGEMPITDSIICDGITDAFHNCHMGITAENVAKK_	136	1	NO	YES	-4.20107	1.53924
14105	Q9BZZ5	API5_HUMAN	No	_IISGIK(de)SIQTVSGR_	202	1	NO	YES	-3.01753	1.38105
14111	Q9C004	SPY4_HUMAN	No	_IQHPITIIPIDQVK(de)TSHVENDYIDNPSIAITTGPKR_	44	1	NO	YES	-3.57052	1.45045
14112	Q9C004	SPY4_HUMAN	No	_TSHVENDYIDNPSIAITTGPK(de)R_	65	1	NO	YES	-4.29675	1.53196
14158	Q9H0S4	DDX47_HUMAN	No	_NIGFTAIPIHGQMSQSK(de)R_	301	1	NO	YES	-3.55786	1.45986
14209	Q9H3K6	BOLA2_HUMAN	No	_VIVVSAK(de)FEGKPIIQR_	43	1	NO	YES	-3.81792	1.47767
14280	Q9H9B4	SFXN1_HUMAN	No	_AK(de)YIYDSAFHPDTGEK_	72	1	NO	YES	-5.09173	2.02062
14435	Q9NR28	DBLOH_HUMAN	No	_NHIQIVK(de)IQVEEVHQISR_	191	1	NO	YES	-2.98957	1.40455
14522	Q9NSE4	SYIM_HUMAN	No	_SFAK(de)AAIEK_	189	1	NO	YES	-3.77756	1.6066
14673	Q9NYK5	RM39_HUMAN	No	_K(de)SIIAIVDGQPWDMYKPITK_	102	1	NO	YES	-4.54363	1.82624
14832	Q9P258	RCC2_HUMAN	No	_IVK(de)IFDFPGR_	377	1	NO	YES	-3.66838	1.96829
14912	Q9P2J5	SYLC_HUMAN	No	_VIEPYPSK(de)ISGIK_	278	1	NO	YES	-4.00477	1.53505
15027	Q9UGP8	SEC63_HUMAN	No	_IK(de)TIQDIVSIK_	407	1	NO	YES	-3.46208	1.71864
15140	Q9UJU6	DBNL_HUMAN	No	_VGK(de)DSFWAK_	176	1	NO	YES	-2.87379	1.40368
15313	Q9UNZ5	L10K_HUMAN	No	_TAAAASEK(de)NR_	25	1	NO	YES	-3.99422	2.69207
15323	Q9UQ80	PA2G4_HUMAN	No	_VAHSFNCTPIEGMISHQIK(de)QHVIDGEK_	191	1	NO	YES	-4.59039	1.76808
15459	Q9Y2R5	RT17_HUMAN	No	_K(de)TYFAHDAIQQCTVGDIVIIR_	47	1	NO	YES	-4.57273	1.87892
15531	Q9Y383	LC7L2_HUMAN	No	_MDIGECIK(de)VHDIAIR_	61	1	NO	YES	-2.69434	1.31119
15745	Q9Y4W6	AFG32_HUMAN	No	_IIINDAYK(de)R_	710	1	NO	YES	-3.18493	1.47413
15753	Q9Y508	RN114_HUMAN	No	_K(de)NFFISK_	96	1	NO	YES	-2.94951	1.35836
15771	Q9Y5B9	SP16H_HUMAN	No	_GDK(de)VDIIYNNIK_	696	1	NO	YES	-3.23693	1.44197
15806	Q9Y5V0	ZN706_HUMAN	No	_GQQK(de)IQSQQK_	7	1	NO	YES	-2.68293	1.34576
5649	P31939	PUR9_HUMAN	No	_IAGDK(de)ANYWWIR_	461	1	NO	YES	-3.1832	1.44771
5754	P33176	KINH_HUMAN	No	_VHK(de)QIVR_	847	3	NO	YES	-2.72234	1.39406
5839	P34932	HSP74_HUMAN	No	_QVYVDKIAEIK(de)NIGQPIK_	679	1	NO	YES	-3.95685	1.33655
6023	P35580	MYH10_HUMAN	No	_AAANK(de)IVR_	1842	1	NO	YES	-4.91252	2.34404
6031	P35580	MYH10_HUMAN	No	_AMVNKDDIQK(de)MNPPK_	78	1	NO	YES	-4.11757	2.3612
6037	P35580	MYH10_HUMAN	No	_K(de)IVWIPSER_	34	1	NO	YES	-3.53706	1.71621
6044	P35580	MYH10_HUMAN	No	_EVSTIK(de)NR_	1925	1	NO	YES	-3.96578	2.08993
6048	P35580	MYH10_HUMAN	No	_NNAIK(de)VVR_	1111	1	NO	YES	-3.45783	2.31987
6050	P35580	MYH10_HUMAN	No	_HATAIEEISEQIEQAK(de)R_	1216	1	NO	YES	-3.15824	1.56095
6054	P35580	MYH10_HUMAN	No	_IGQSK(de)IFFR_	767;767	2	NO	YES	-4.57087	2.22511
6055	P35580	MYH10_HUMAN	No	_IIIK(de)QVR_	1596	1	NO	YES	-4.5498	1.66853
6056	P35580	MYH10_HUMAN	No	_IIK(de)DAEAISQRIEEK_	1399	1	NO	YES	-4.0172	1.97864
6069	P35580	MYH10_HUMAN	No	_K(de)IDGETTDIQDQIAEIQAQIDEIKIQIAK_	1059	1	NO	YES	-3.58901	1.4303
6073	P35580	MYH10_HUMAN	No	_K(de)MQAHIQDIEEQIDEEEGAR_	947	1	NO	YES	-3.52301	1.45045
6076	P35580	MYH10_HUMAN	No	_K(de)TTIQVDTINAEIAAER_	1761	1	NO	YES	-3.26249	1.31175
6089	P35580	MYH10_HUMAN	No	_SAAQK(de)SDNAR_	1782	1	NO	YES	-5.54217	3.5065
6092	P35580	MYH10_HUMAN	No	_VFTK(de)VKPIIQVTR_	840	1	NO	YES	-3.69165	1.65681
6138	P35749	MYH11_HUMAN	No	_AQTK(de)EQADFAVEAIAK_	414	1	NO	YES	-4.26257	2.02616
6257	P37235	HPCL1_HUMAN	No	_GAK(de)SDPSIVR_	174	3	NO	YES	-3.68768	1.80469
6466	P40925	MDHC_HUMAN	No	_AQIAIK(de)IGVTANDVK_	170	1	NO	YES	-3.12831	1.34524
6648	P42704	LPPRC_HUMAN	No	_CVANNQVETIEK(de)IVEITQK_	941	1	NO	YES	-2.93312	1.45381
6672	P42704	LPPRC_HUMAN	No	_K(de)VIEEQIEPAVEK_	1224	1	NO	YES	-3.20786	1.61932
6742	P43304	GPDM_HUMAN	No	_K(de)FIYYEMGYK_	597	1	NO	YES	-3.22944	1.38068
6743	P43304	GPDM_HUMAN	No	_MVK(de)EAIHER_	138	1	NO	YES	-2.97135	3.12756
7042	P47895	AL1A3_HUMAN	No	_IAFTGSTEVGK(de)IVK_	263	1	NO	YES	-3.75196	1.35989
7055	P47895	AL1A3_HUMAN	No	_YFAGWADKIQGK(de)TIPTDDNVVCFTR_	154	1	NO	YES	-3.69664	1.36844
7246	P49327	FAS_HUMAN	No	_FDASFFGVHPK(de)QAHTMDPQIR_	70	1	NO	YES	-5.72848	2.73802
7374	P49736	MCM2_HUMAN	No	_YIIYAK(de)ER_	728	1	NO	YES	-3.83327	1.9309
7453	P50395	GDIB_HUMAN	No	_FK(de)IPGSPPESMGR_	57	1	NO	YES	-3.94055	1.39474
7652	P51606	RENBP_HUMAN	No	_DGRPVK(de)VQR_	126	1	NO	YES	-2.72637	1.50379
8169	P55327	TPD52_HUMAN	No	_QNIAK(de)GWQDVTATSAYKK_	125	1	NO	YES	-3.66834	1.72516
8180	P55786	PSA_HUMAN	No	_GIVIGK(de)IGK_	712	1	NO	YES	-2.71698	1.34247
8239	P56556	NDUA6_HUMAN	No	_QATSTASTFVK(de)PIFSR_	44	1	NO	YES	-3.09787	1.44771
8241	P56693	SOX10_HUMAN	No	_KDHPDYK(de)YQPR_	172	3	NO	YES	-2.91782	1.79826
8243	P56693	SOX10_HUMAN	No	_IINESDK(de)RPFIEEAER_	150	1	NO	YES	-4.55173	1.97551
8251	P57729	RAB38_HUMAN	No	_IIVIGDIGVGK(de)TSIIKR_	22	1	NO	YES	-2.70182	1.37893
8261	P58546	MTPN_HUMAN	No	_NGDIDEVK(de)DYVAKGEDVNR_	19	1	NO	YES	-3.9638	1.68781
8388	P61088	UBE2N_HUMAN	No	_IYHPNVDK(de)IGR_	82	1	NO	YES	-3.59337	1.54961
8411	P61160	ARP2_HUMAN	No	_EK(de)ICYVGYNIEQEQK_	219	1	NO	YES	-4.20375	2.29575
8539	P61916	NPC2_HUMAN	No	_TYSYINKIPVK(de)SEYPSIK_	116	1	NO	YES	-3.14958	1.53716
9192	P78417	GSTO1_HUMAN	No	_EFTK(de)IEEVITNKK_	152	1	NO	YES	-3.15797	1.34095
9337	P83731	RL24_HUMAN	No	_KAK(de)QASK_	119	1	NO	YES	-3.7241	1.37892
9566	Q00796	DHSO_HUMAN	No	_(ac)AAAAK(de)PNNISIVVHGPGDIR_	6	1	NO	YES	-4.10527	1.88095
9567	Q00796	DHSO_HUMAN	No	_GIGIK(de)IMIK_	345	1	NO	YES	-3.41104	2.09224
9588	Q00839	HNRPU_HUMAN	No	_K(de)AIPPEKK_	675	1	NO	YES	-3.03963	1.86103
9672	Q01130	SRSF2_HUMAN	No	_SK(de)SSSVSR_	172	2	NO	YES	-4.41606	2.20279
9793	Q02790	FKBP4_HUMAN	No	_IASHINIAMCHIK(de)IQAFSAAIESCNK_	331	1	NO	YES	-3.2816	1.55097
9818	Q02878	RL6_HUMAN	No	_HQEGEIFDTEKEK(de)YEITEQR_	239	1	NO	YES	-4.67693	1.39697
9845	Q02952	AKA12_HUMAN	No	_VFK(de)FVGFK_	177	1	NO	YES	-5.05026	2.92785
9852	Q02952	AKA12_HUMAN	No	_SSK(de)IVQNIIQTAVDQFVR_	1548	1	NO	YES	-5.52833	4.76148
9975	Q05707	COEA1_HUMAN	No	_AIK(de)YVR_	1117	1	NO	YES	-3.30215	1.4083
10015	Q07021	C1QBP_HUMAN	No	_VEEQEPEITSTPNFVVEVIK(de)NDDGKK_	174	1	NO	YES	-4.65378	1.81551
10071	Q08211	DHX9_HUMAN	No	_IQGEYK(de)YTQVGPDHNR_	199	1	NO	YES	-3.57316	1.40672
10409	Q12905	ILF2_HUMAN	No	_WFEENASQSTVK(de)VIIR_	221	1	NO	YES	-5.16984	2.56101
10505	Q13148	TADBP_HUMAN	No	_FTEYETQVK(de)VMSQR_	160	1	NO	YES	-3.34912	1.97541
10861	Q13813	SPTN1_HUMAN	No	_ITK(de)EAGSVSIR_	1057	1	NO	YES	-3.13196	1.74433
10863	Q13813	SPTN1_HUMAN	No	_KVEDIFITFAKK(de)_	2099	1	NO	YES	-3.53963	1.44035
10935	Q14103	HNRPD_HUMAN	No	_EEWK(de)MFIGGISWDTTKK_	98	1	NO	YES	-3.67163	1.67033
11138	Q14376	GALE_HUMAN	No	_DYIHVVDIAK(de)GHIAAIR_	249	1	NO	YES	-3.12931	1.41797
11142	Q14376	GALE_HUMAN	No	_VNITGTIQIIEIMK(de)AHGVK_	120	1	NO	YES	-2.75311	1.54382
11165	Q14566	MCM6_HUMAN	No	_FVDFQK(de)VR_	205	1	NO	YES	-2.98075	1.57026
11198	Q14683	SMC1A_HUMAN	No	_SGEIAQEYDK(de)R_	170	1	NO	YES	-2.71985	1.43088
11278	Q14919	NC2A_HUMAN	No	_K(de)ACQVTQSR_	52	1	NO	YES	-3.05121	1.64857
11439	Q15061	WDR43_HUMAN	No	_NVNIIK(de)K_	491	1	NO	YES	-2.87577	1.49484
11746	Q15459	SF3A1_HUMAN	No	_VEWAK(de)FQER_	251	1	NO	YES	-3.5766	1.40188
11752	Q15599	NHRF2_HUMAN	No	_K(de)GPQGYGFNIHSDK_	156	1	NO	YES	-3.20267	1.50543
11777	Q15691	MARE1_HUMAN	No	_ITVEDIEK(de)ERDFYFGK_	212	1	NO	YES	-2.93439	1.39415
11917	Q16637	SMN_HUMAN	No	_HAIK(de)NGDICETSGKPK_	55	1	NO	YES	-3.29939	1.38778
11960	Q16666	IF16_HUMAN	No	_SEDTISK(de)MNDFMR_	451	1	NO	YES	-4.25771	2.03703
12031	Q16851	UGPA_HUMAN	No	_GPSVDWGK(de)IQRPPEDSIQPYEK_	77	1	NO	YES	-4.13287	1.49432
12130	Q4VC31	CCD58_HUMAN	No	_IVHEINTTVPTASFAGK(de)IDASQTCK_	46	1	NO	YES	-4.33377	1.99426
12155	Q53H12	AGK_HUMAN	No	_K(de)IQFFCDPR_	403	1	NO	YES	-3.57068	1.31427
12188	Q5JTH9	RRP12_HUMAN	No	_SDITVDAVK(de)IHNEIQSGSIR_	57	1	NO	YES	-4.04692	1.39403
12259	Q5VW32	BROX_HUMAN	No	_IYAK(de)AEAICK_	283	1	NO	YES	-3.8563	1.58576
12364	Q6P2Q9	PRP8_HUMAN	No	_GATVDK(de)TVCKK_	769	1	NO	YES	-2.89397	1.44557
12379	Q6P2Q9	PRP8_HUMAN	No	_K(de)YVNGSTYQR_	218	1	NO	YES	-3.12984	2.14653
12430	Q6UVK1	CSPG4_HUMAN	No	_VSDGIQASPPATIK(de)VVAIRPAIQIHR_	655	1	NO	YES	-3.78031	1.30795
12644	Q86UP2	KTN1_HUMAN	No	_ITDTIVSK(de)QQIEQR_	543	1	NO	YES	-3.83531	1.58463
12690	Q86VP6	CAND1_HUMAN	No	_MIIK(de)IIEDKNGEVQNIAVK_	55	1	NO	YES	-3.87023	1.76967
12832	Q8N766	EMC1_HUMAN	No	_FASIEFSPGSK(de)K_	52	1	NO	YES	-3.32812	1.32629
12877	Q8NBX0	SCPDL_HUMAN	No	_IIDRINK(de)HGIEFSVISSSEV_	416	1	NO	YES	-3.34938	1.32203
13185	Q92841	DDX17_HUMAN	No	_IIQIMEEIMAEK(de)ENK_	417	1	NO	YES	-2.71482	1.3989
13275	Q969G3	SMCE1_HUMAN	No	_K(de)IEAEIIQIEER_	240	1	NO	YES	-3.01896	1.43467
13289	Q969T9	WBP2_HUMAN	No	_K(de)GTVYITPYR_	47	1	NO	YES	-3.90509	1.98185
13293	Q969X5	ERGI1_HUMAN	No	_ITSNPIASHDYIIK(de)IVPTVYEDK_	190	1	NO	YES	-3.53864	1.42173
13421	Q96E39	RMXL1_HUMAN	No	_AIETVFGK(de)YGR_	30	1	NO	YES	-3.03065	1.44132
13433	Q96EP5	DAZP1_HUMAN	No	_K(de)FGVVTEVVMIYDAEK_	135	1	NO	YES	-2.78097	1.45839
13682	Q99497	PARK7_HUMAN	No	_KGIIAAICAGPTAIIAHEIGFGSK(de)VTTHPIAK_	122	1	NO	YES	-4.37637	1.82469
13774	Q99798	ACON_HUMAN	No	_ITGSISGWSSPK(de)DVIIK_	245	1	NO	YES	-2.879	1.54969
13988	Q9BV79	MECR_HUMAN	No	_NFFK(de)DMPQPR_	252	1	NO	YES	-2.85705	1.65539
14015	Q9BWD1	THIC_HUMAN	No	_TGVK(de)IGEMPITDSIICDGITDAFHNCHMGITAENVAKK_	136	1	NO	YES	-4.20107	1.53924
14105	Q9BZZ5	API5_HUMAN	No	_IISGIK(de)SIQTVSGR_	202	1	NO	YES	-3.01753	1.38105
14111	Q9C004	SPY4_HUMAN	No	_IQHPITIIPIDQVK(de)TSHVENDYIDNPSIAITTGPKR_	44	1	NO	YES	-3.57052	1.45045
14112	Q9C004	SPY4_HUMAN	No	_TSHVENDYIDNPSIAITTGPK(de)R_	65	1	NO	YES	-4.29675	1.53196
14158	Q9H0S4	DDX47_HUMAN	No	_NIGFTAIPIHGQMSQSK(de)R_	301	1	NO	YES	-3.55786	1.45986
14209	Q9H3K6	BOLA2_HUMAN	No	_VIVVSAK(de)FEGKPIIQR_	43	1	NO	YES	-3.81792	1.47767
14280	Q9H9B4	SFXN1_HUMAN	No	_AK(de)YIYDSAFHPDTGEK_	72	1	NO	YES	-5.09173	2.02062
14435	Q9NR28	DBLOH_HUMAN	No	_NHIQIVK(de)IQVEEVHQISR_	191	1	NO	YES	-2.98957	1.40455
14522	Q9NSE4	SYIM_HUMAN	No	_SFAK(de)AAIEK_	189	1	NO	YES	-3.77756	1.6066
14673	Q9NYK5	RM39_HUMAN	No	_K(de)SIIAIVDGQPWDMYKPITK_	102	1	NO	YES	-4.54363	1.82624
14832	Q9P258	RCC2_HUMAN	No	_IVK(de)IFDFPGR_	377	1	NO	YES	-3.66838	1.96829
14912	Q9P2J5	SYLC_HUMAN	No	_VIEPYPSK(de)ISGIK_	278	1	NO	YES	-4.00477	1.53505
15027	Q9UGP8	SEC63_HUMAN	No	_IK(de)TIQDIVSIK_	407	1	NO	YES	-3.46208	1.71864
15140	Q9UJU6	DBNL_HUMAN	No	_VGK(de)DSFWAK_	176	1	NO	YES	-2.87379	1.40368
15313	Q9UNZ5	L10K_HUMAN	No	_TAAAASEK(de)NR_	25	1	NO	YES	-3.99422	2.69207
15323	Q9UQ80	PA2G4_HUMAN	No	_VAHSFNCTPIEGMISHQIK(de)QHVIDGEK_	191	1	NO	YES	-4.59039	1.76808
15459	Q9Y2R5	RT17_HUMAN	No	_K(de)TYFAHDAIQQCTVGDIVIIR_	47	1	NO	YES	-4.57273	1.87892
15531	Q9Y383	LC7L2_HUMAN	No	_MDIGECIK(de)VHDIAIR_	61	1	NO	YES	-2.69434	1.31119
15745	Q9Y4W6	AFG32_HUMAN	No	_IIINDAYK(de)R_	710	1	NO	YES	-3.18493	1.47413
15753	Q9Y508	RN114_HUMAN	No	_K(de)NFFISK_	96	1	NO	YES	-2.94951	1.35836
15771	Q9Y5B9	SP16H_HUMAN	No	_GDK(de)VDIIYNNIK_	696	1	NO	YES	-3.23693	1.44197
15806	Q9Y5V0	ZN706_HUMAN	No	_GQQK(de)IQSQQK_	7	1	NO	YES	-2.68293	1.34576

## Sheet: Supp. Table 3A
Supplementary Table 3A: List of significantly increased enzymes (fold change > + 2 std. dev. away from the mean, p-value < 0.05) in the BRAFi resistant cell lines used for GO Enrichment analysis
id	Representative Protein	Uniprot ID	DBT-ATP Sequence	Modification Sites	Shared Proteins	fold change(Res-Naive)	`-log10(p-value)			NR Webgestalt Input
3599	P12814	ACTN1_HUMAN	_IHKPPK(de)VQEK_	327	1	3.22853	1.40448			P12814
921	O43707	ACTN4_HUMAN	_ISIEMNGTIEDQISHIK(de)QYER_	691	1	5.88248	2.13912			O43707
10151	Q09666	AHNK_HUMAN	_APK(de)IPMPDFDIHIKGPK_	2962	1	4.23705	1.53936			Q09666
10172	Q09666	AHNK_HUMAN	_IKFPTMK(de)VPK_	310	1	3.73691	1.62484			P04083
10195	Q09666	AHNK_HUMAN	_MPFISISSPK(de)VSMPDVEINIK_	3414	1	3.2701	1.45789			P08243
10196	Q09666	AHNK_HUMAN	_FK(de)MPSMNIQTHK_	1568	1	3.37472	1.33703			P11586
10234	Q09666	AHNK_HUMAN	_IKFPK(de)FSMPK_	5235	1	3.07093	1.31097			Q05682
10268	Q09666	AHNK_HUMAN	_K(de)GDRSPEPGQTWTR_	89	1	3.06099	1.81772			Q96CT7
10310	Q09666	AHNK_HUMAN	_VDIDVPDVDVQGPDWHIK(de)MPK_	4187	1	4.32058	1.43309			Q07065
10344	Q09666	AHNK_HUMAN	_VKMPK(de)FSMPGFK_	1389	1	3.47486	1.46859			P52943
2127	P04083	ANXA1_HUMAN	_MYGISICQAIIDETK(de)GDYEK_	332	1	4.40005	1.32802			O75718
2135	P04083	ANXA1_HUMAN	_NAIISIAK(de)GDRSEDFGVNEDIADSDAR_	185	1	5.26076	1.4018			P02511
2136	P04083	ANXA1_HUMAN	_SSK(de)GGPGSAVSPYPTFNPSSDVAAIHK_	29	1	5.33418	1.40504			O60716
2884	P08243	ASNS_HUMAN	_ETFEDSNIIPK(de)EIIWRPK_	460	1	3.43567	1.4061			Q9NVP1
3465	P11586	C1TC_HUMAN	_MHGGGPTVTAGIPIPK(de)AYIQENIEIVEK_	721	1	2.8852	1.38846			Q9Y394
9945	Q05682	CALD1_HUMAN	_SVQK(de)SSGVK_	659	1	2.69761	1.68838			Q14204
9958	Q05682	CALD1_HUMAN	_IREEEEK(de)R_	601	1	4.32365	1.58439			P55084
13389	Q96CT7	CC124_HUMAN	_VATSSK(de)VTR_	94	1	2.95201	1.83668			Q9NZN4
10037	Q07065	CKAP4_HUMAN	_TAVDSIVAYSVK(de)IETNENNIESAK_	566	1	4.83051	1.62476			O75821
7825	P52943	CRIP2_HUMAN	_VSSIGK(de)DWHK_	23	1	3.09107	1.87081			Q5T890
1475	O75718	CRTAP_HUMAN	_FIQFAYFK(de)ANNIPK_	157	1	2.86665	1.37046			P15311
2010	P02511	CRYAB_HUMAN	_TIPITREEK(de)PAVTAAPK_	166	1	4.17018	1.38573			Q96AC1
2012	P02511	CRYAB_HUMAN	_IEK(de)DRFSVNIDVK_	72	1	6.14375	2.16547			P21333
1106	O60716	CTND1_HUMAN	_K(de)SDFQVNINNASR_	846	1	3.28812	1.57555			O75369
14598	Q9NVP1	DDX18_HUMAN	_QKQNK(de)R_	463	1	3.8245	1.65045			P35052
15534	Q9Y394	DHRS7_HUMAN	_EK(de)DIIVIPIDITDTGSHEAATK_	103	1	3.16807	1.42398			P07305
11070	Q14204	DYHC1_HUMAN	_WTDENIDTVAIK(de)HFPNIDREK_	2856	1	4.69795	2.36314			P51858
8107	P55084	ECHB_HUMAN	_AIAMGYKPK(de)AYIR_	334	1	3.70262	1.47657			O60506
8119	P55084	ECHB_HUMAN	_SHSIAK(de)K_	253	1	3.36373	1.57693			Q12905
14782	Q9NZN4	EHD2_HUMAN	_TWMVGTK(de)IPNSVIGR_	480	1	4.23673	2.23406			Q9NX62
1488	O75821	EIF3G_HUMAN	_KASK(de)AVAR_	94	1	4.33913	1.73707			P56199
12236	Q5T890	ER6L2_HUMAN	_IDGSTK(de)SEERIK_	570	1	3.18566	1.30303			Q9UHB6
3978	P15311	EZRI_HUMAN	_ITEAEK(de)NER_	523	1	2.80435	1.43083			P55145
13317	Q96AC1	FERM2_HUMAN	_NK(de)QITAR_	533	1	3.24364	1.30183			P46821
4558	P21333	FLNA_HUMAN	_AWGPGIEGGVVGK(de)SADFVVEAIGDDVGTIGFSVEGPSQAK_	593	1	3.84205	1.57572			P27816
4586	P21333	FLNA_HUMAN	_SKGAGGQGK(de)VASK_	1003	1	3.59398	1.60738			P35579
4621	P21333	FLNA_HUMAN	_VK(de)MDCQECPEGYRVTYTPMAPGSYIISIK_	2473	1	3.97606	1.78483			O43795
1307	O75369	FLNB_HUMAN	_VFGPGIEGK(de)DVFR_	1241	1	2.97234	1.36876			Q14980
5847	P35052	GPC1_HUMAN	_K(de)VAQVPIGPECSR_	236	1	3.64546	2.06904			O95340
2590	P07305	H10_HUMAN	_K(de)STDHPK_	21	1	2.96344	1.4325			Q9NVD7
7692	P51858	HDGF_HUMAN	_AGDIIEDSPK(de)RPK_	167	1	3.04741	1.46942			O00151
1069	O60506	HNRPQ_HUMAN	_SGK(de)HIGVCISVANNR_	232	1	3.73083	1.71568			Q99471
10407	Q12905	ILF2_HUMAN	_K(de)IIGQEGDASYIASEISTWDGVIVTPSEK_	328	1	3.72383	1.54981			O15173
14631	Q9NX62	IMPA3_HUMAN	_K(de)MFYIIK_	116	1	3.14021	1.46076			Q15149
8227	P56199	ITA1_HUMAN	_K(de)VIQDCEDENIQR_	292	1	2.66185	1.62929			P45877
15036	Q9UHB6	LIMA1_HUMAN	_MMFEKGEPTQTK(de)IIR_	210	1	4.19397	1.71107			O43242
8126	P55145	MANF_HUMAN	_YAPK(de)AASAR_	174	1	4.2626	1.93823			P20962
6960	P46821	MAP1B_HUMAN	_K(de)SSTPISEAK_	741	1	2.87038	1.56571			Q15293
6962	P46821	MAP1B_HUMAN	_SAK(de)TATAGPGTTK_	2333	1	2.70998	1.30102			Q6NUM9
5273	P27816	MAP4_HUMAN	_HVPGGGNVQIQNK(de)K_	1028	1	3.50105	1.62844			P61353
5934	P35579	MYH9_HUMAN	_SMMQDREDQSIICTGESGAGK(de)TENTK_	180	1	3.69121	1.46444			P62888
5946	P35579	MYH9_HUMAN	_FISNGHVTIPGQQDK(de)DMFQETMEAMR_	316	1	5.23713	2.23449			Q9P2E9
5953	P35579	MYH9_HUMAN	_IAEFTTNITEEEEKSK(de)SIAK_	1016	1	4.73388	1.55497			O94979
968	O43795	MYO1B_HUMAN	_DISQAMWK(de)ASHAIIK_	544	1	3.50153	1.36253			Q9H173
975	O43795	MYO1B_HUMAN	_SIFPEGNPAK(de)INIK_	561	1	3.37328	1.75216			P19623
11312	Q14980	NUMA1_HUMAN	_AIQQVQEK(de)EVR_	891	1	2.81578	1.36146			O94875
11315	Q14980	NUMA1_HUMAN	_GRAQADIAIEK(de)AAR_	1024	1	3.07537	1.30409			P12081
11355	Q14980	NUMA1_HUMAN	_K(de)IITEKDAQIAMMQQR_	242	1	3.50358	1.47639			P41252
1731	O95340	PAPS2_HUMAN	_AGEIK(de)GFTGIDSDYEKPETPER_	173	1	4.2216	1.671			Q9P2J5
1732	O95340	PAPS2_HUMAN	_DIHEIFVPENK(de)IDHVR_	233	1	5.13532	3.64004			Q01995
14575	Q9NVD7	PARVA_HUMAN	_VIYNIFTK(de)YR_	367	1	3.94281	2.00513			P23193
209	O00151	PDLI1_HUMAN	_VAASIGNAQKIPMCDK(de)CGTGIVGVFVK_	262	1	4.90116	2.16912			Q9Y490
211	O00151	PDLI1_HUMAN	_QK(de)GHFFVEDQIYCEK_	296	1	4.96495	2.22592			P67936
212	O00151	PDLI1_HUMAN	_IK(de)GCTDNITITVAR_	71	1	5.28369	2.47559			Q15029
13669	Q99471	PFD5_HUMAN	_VVQTK(de)YVEAK_	42	1	2.62725	1.3312			Q8TBC4
638	O15173	PGRC2_HUMAN	_K(de)RDFSIEQIR_	100	1	4.22806	2.85231			P18206
11511	Q15149	PLEC_HUMAN	_EGVMVAK(de)K_	28	1	4.79666	1.54963
6801	P45877	PPIC_HUMAN	_IVIGIFGK(de)VVPK_	61	1	2.66697	1.42787
780	O43242	PSMD3_HUMAN	_EIDTVTIEDIKEHVK(de)QIEK_	80	1	3.90425	1.7637
4520	P20962	PTMS_HUMAN	_SVEAAAEISAK(de)DIK_	15	1	4.98503	1.56983
11662	Q15293	RCN1_HUMAN	_ITKEEIIENWNMFVGSQATNYGEDITK(de)NHDEI_	326	1	2.85849	1.43324
12319	Q6NUM9	RETST_HUMAN	_AGGAVITK(de)ATVQSVIIDSAGK_	317	1	2.81635	1.98386
8499	P61353	RL27_HUMAN	_EAK(de)VKFEER_	115	1	3.002	1.78623
8874	P62888	RL30_HUMAN	_IQIVMK(de)SGK_	23	1	3.83654	1.34613
14873	Q9P2E9	RRBP1_HUMAN	_K(de)AEGAPNQGR_	211	1	3.54285	1.32276
14887	Q9P2E9	RRBP1_HUMAN	_K(de)VEGAPTQGR_	281	1	3.27687	1.84738
1667	O94979	SC31A_HUMAN	_K(de)IDDASK_	1142	1	3.10249	1.85399
14169	Q9H173	SIL1_HUMAN	_IQYEDK(de)FR_	109	1	4.30904	2.80406
4437	P19623	SPEE_HUMAN	_NPSTNFQEPVQPITQQQVAQMQIK(de)YYNSDVHR_	277	1	3.55714	1.71332
1622	O94875	SRBS2_HUMAN	_TQTYRPISK(de)SHSDNSPNAFK_	151	1	3.18575	2.00326
3515	P12081	SYHC_HUMAN	_IEAIEEK(de)IR_	403	1	3.24047	1.69987
6586	P41252	SYIC_HUMAN	_TIK(de)EQGR_	382	1	3.98022	1.72138
14900	Q9P2J5	SYLC_HUMAN	_AGSSK(de)YQWGIMK_	155	1	3.63224	1.47295
9731	Q01995	TAGL_HUMAN	_EFTESQIQEGK(de)HVIGIQM(ox)GSNR_	172	1	5.03977	1.53748
9735	Q01995	TAGL_HUMAN	_IGFQVWIK(de)NGVIISK_	57	1	3.96066	1.52982
4798	P23193	TCEA1_HUMAN	_KMDK(de)MVQK_	14	1	4.24636	1.71524
15642	Q9Y490	TLN1_HUMAN	_EIVAQGK(de)VGAIPANAIDDGQWSQGIISAAR_	2375	1	2.72378	1.31048
15654	Q9Y490	TLN1_HUMAN	_QAAASATQTIAAAQHAASTPK(de)ASAGPQPIIVQSCK_	943	1	4.59197	2.25316
9061	P67936	TPM4_HUMAN	_AEVSEIK(de)CGDIEEEIKNVTNNIK_	153	1	4.501	1.46635
11403	Q15029	U5S1_HUMAN	_IWGDIYFNPK(de)TR_	352	1	3.85685	2.34043
12953	Q8TBC4	UBA3_HUMAN	_IQEVIDYITNSASIQMK(de)SPAITATIEGK_	398	1	3.09269	1.36491
4302	P18206	VINC_HUMAN	_EAEAASIK(de)IR_	1115	1	3.12067	1.32094
4308	P18206	VINC_HUMAN	_IIGAVAK(de)VR_	830	1	4.73686	1.89238
4310	P18206	VINC_HUMAN	_INQAK(de)GWIRDPSASPGDAGEQAIR_	281	1	3.30184	1.57054
4315	P18206	VINC_HUMAN	_NFTVEK(de)MSAEINEIIR_	236	1	4.23301	3.12472
4317	P18206	VINC_HUMAN	_TNISDEESEQATEMIVHNAQNIMQSVK(de)ETVR_	1103	1	3.13608	1.48894
id	Unique identifier for each DBT-peptide specified in MaxQuant generated Desthiobiotin-ATP.txt file

## Sheet: Supp. Table 3B
Supplementary Table 3B: List of significantly decreased enzymes (fold change > + 2 std. dev. away from the mean, p-value < 0.05) in the BRAFi resistant cell lines used for GO Enrichment analysis
id	Representative Protein	Uniprot ID	DBT-ATP Sequence	Modification Sites	fold change (Res-Naive)	`-log10 (p-value)			NR Webgestalt Input
3407	P11310	ACADM_HUMAN	_VAMGAFDK(de)TRPVVAAGAVGIAQR_	279	-4.23078	1.83155			P11310
13774	Q99798	ACON_HUMAN	_ITGSISGWSSPK(de)DVIIK_	245	-2.879	1.54969			Q99798
1771	O95573	ACSL3_HUMAN	_AFNFGNGIQMIGQK(de)PK_	157	-4.67797	2.62753			O95573
1781	O95573	ACSL3_HUMAN	_TK(de)ADFFEDENGQR_	547	-4.15356	1.92034			Q9Y4W6
15745	Q9Y4W6	AFG32_HUMAN	_IIINDAYK(de)R_	710	-3.18493	1.47413			Q53H12
12155	Q53H12	AGK_HUMAN	_K(de)IQFFCDPR_	403	-3.57068	1.31427			Q02952
9845	Q02952	AKA12_HUMAN	_VFK(de)FVGFK_	177	-5.05026	2.92785			P47895
9852	Q02952	AKA12_HUMAN	_SSK(de)IVQNIIQTAVDQFVR_	1548	-5.52833	4.76148			Q9BZZ5
7042	P47895	AL1A3_HUMAN	_IAFTGSTEVGK(de)IVK_	263	-3.75196	1.35989			P61160
7055	P47895	AL1A3_HUMAN	_YFAGWADKIQGK(de)TIPTDDNVVCFTR_	154	-3.69664	1.36844			P05026
14105	Q9BZZ5	API5_HUMAN	_IISGIK(de)SIQTVSGR_	202	-3.01753	1.38105			O00154
8411	P61160	ARP2_HUMAN	_EK(de)ICYVGYNIEQEQK_	219	-4.20375	2.29575			Q9H3K6
2256	P05026	AT1B1_HUMAN	_EGKPCIIIK(de)INR_	179	-3.71541	1.60601			Q5VW32
220	O00154	BACH_HUMAN	_FEEGK(de)GR_	362	-3.50467	1.76565			Q07021
14209	Q9H3K6	BOLA2_HUMAN	_VIVVSAK(de)FEGKPIIQR_	43	-3.81792	1.47767			P11586
12259	Q5VW32	BROX_HUMAN	_IYAK(de)AEAICK_	283	-3.8563	1.58576			Q86VP6
10015	Q07021	C1QBP_HUMAN	_VEEQEPEITSTPNFVVEVIK(de)NDDGKK_	174	-4.65378	1.81551			Q4VC31
3456	P11586	C1TC_HUMAN	_CTHWAEGGK(de)GAIAIAQAVQR_	793	-3.45137	1.4468			O75390
12690	Q86VP6	CAND1_HUMAN	_MIIK(de)IIEDKNGEVQNIAVK_	55	-3.87023	1.76967			Q05707
12130	Q4VC31	CCD58_HUMAN	_IVHEINTTVPTASFAGK(de)IDASQTCK_	46	-4.33377	1.99426			P10606
1337	O75390	CISY_HUMAN	_GMK(de)GIVYETSVIDPDEGIR_	76	-3.28162	1.38338			Q6UVK1
9975	Q05707	COEA1_HUMAN	_AIK(de)YVR_	1117	-3.30215	1.4083			Q96EP5
3238	P10606	COX5B_HUMAN	_K(de)GIDPYNVIAPK_	57	-3.82936	1.43681			Q9NR28
12430	Q6UVK1	CSPG4_HUMAN	_VSDGIQASPPATIK(de)VVAIRPAIQIHR_	655	-3.78031	1.30795			Q9UJU6
13433	Q96EP5	DAZP1_HUMAN	_K(de)FGVVTEVVMIYDAEK_	135	-2.78097	1.45839			Q92841
14435	Q9NR28	DBLOH_HUMAN	_NHIQIVK(de)IQVEEVHQISR_	191	-2.98957	1.40455			Q9H0S4
15140	Q9UJU6	DBNL_HUMAN	_VGK(de)DSFWAK_	176	-2.87379	1.40368			Q00796
13185	Q92841	DDX17_HUMAN	_IIQIMEEIMAEK(de)ENK_	417	-2.71482	1.3989			Q08211
14158	Q9H0S4	DDX47_HUMAN	_NIGFTAIPIHGQMSQSK(de)R_	301	-3.55786	1.45986			O75521
9566	Q00796	DHSO_HUMAN	_(ac)AAAAK(de)PNNISIVVHGPGDIR_	6	-4.10527	1.88095			Q8N766
9567	Q00796	DHSO_HUMAN	_GIGIK(de)IMIK_	345	-3.41104	2.09224			P09104
10071	Q08211	DHX9_HUMAN	_IQGEYK(de)YTQVGPDHNR_	199	-3.57316	1.40672			Q969X5
1390	O75521	ECI2_HUMAN	_K(de)NAINTEMYHEIMR_	161	-3.43106	1.35328			P49327
12832	Q8N766	EMC1_HUMAN	_FASIEFSPGSK(de)K_	52	-3.32812	1.32629			Q02790
2977	P09104	ENOG_HUMAN	_AVEEK(de)ACNCIIIK_	335	-4.30802	1.48722			P14324
13293	Q969X5	ERGI1_HUMAN	_ITSNPIASHDYIIK(de)IVPTVYEDK_	190	-3.53864	1.42173			Q14376
7246	P49327	FAS_HUMAN	_FDASFFGVHPK(de)QAHTMDPQIR_	70	-5.72848	2.73802			P50395
9793	Q02790	FKBP4_HUMAN	_IASHINIAMCHIK(de)IQAFSAAIESCNK_	331	-3.2816	1.55097			P07093
3821	P14324	FPPS_HUMAN	_IKEVIEYNAIGGK(de)YNR_	123	-4.3656	1.93316			P43304
11138	Q14376	GALE_HUMAN	_DYIHVVDIAK(de)GHIAAIR_	249	-3.12931	1.41797			P78417
11142	Q14376	GALE_HUMAN	_VNITGTIQIIEIMK(de)AHGVK_	120	-2.75311	1.54382			P16403
7453	P50395	GDIB_HUMAN	_FK(de)IPGSPPESMGR_	57	-3.94055	1.39474			Q14103
2537	P07093	GDN_HUMAN	_YGVNGVGK(de)IIK_	90	-3.21271	1.49759			Q00839
6742	P43304	GPDM_HUMAN	_K(de)FIYYEMGYK_	597	-3.22944	1.38068			P07900
6743	P43304	GPDM_HUMAN	_MVK(de)EAIHER_	138	-2.97135	3.12756			P08238
9192	P78417	GSTO1_HUMAN	_EFTK(de)IEEVITNKK_	152	-3.15797	1.34095			P34932
4073	P16403	H12_HUMAN	_SAAK(de)AVKPK_	191	-5.45061	1.86828			O43837
10935	Q14103	HNRPD_HUMAN	_EEWK(de)MFIGGISWDTTKK_	98	-3.67163	1.67033			Q16666
9588	Q00839	HNRPU_HUMAN	_K(de)AIPPEKK_	675	-3.03963	1.86103			Q12905
2737	P07900	HS90A_HUMAN	_SITNDWEDHIAVK(de)HFSVEGQIEFR_	327	-5.32686	1.7201			Q86UP2
2873	P08238	HS90B_HUMAN	_SITNDWEDHIAVK(de)HFSVEGQIEFR_	319	-5.32686	1.7201			Q9UNZ5
5839	P34932	HSP74_HUMAN	_QVYVDKIAEIK(de)NIGQPIK_	679	-3.95685	1.33655			O43813
990	O43837	IDH3B_HUMAN	_RK(de)IDIFANVVHVK_	135	-2.90429	1.63967			Q9Y383
11960	Q16666	IF16_HUMAN	_SEDTISK(de)MNDFMR_	451	-4.25771	2.03703			P42704
10409	Q12905	ILF2_HUMAN	_WFEENASQSTVK(de)VIIR_	221	-5.16984	2.56101			Q15691
12644	Q86UP2	KTN1_HUMAN	_ITDTIVSK(de)QQIEQR_	543	-3.83531	1.58463			P49736
15313	Q9UNZ5	L10K_HUMAN	_TAAAASEK(de)NR_	25	-3.99422	2.69207			P25205
982	O43813	LANC1_HUMAN	_K(de)GYGICHGSAGNAYAFITIYNITQDMK_	317	-3.98036	1.91497			Q14566
15531	Q9Y383	LC7L2_HUMAN	_MDIGECIK(de)VHDIAIR_	61	-2.69434	1.31119			P40925
6648	P42704	LPPRC_HUMAN	_CVANNQVETIEK(de)IVEITQK_	941	-2.93312	1.45381			Q9BV79
6672	P42704	LPPRC_HUMAN	_K(de)VIEEQIEPAVEK_	1224	-3.20786	1.61932			P58546
11777	Q15691	MARE1_HUMAN	_ITVEDIEK(de)ERDFYFGK_	212	-2.93439	1.39415			P35580
7374	P49736	MCM2_HUMAN	_YIIYAK(de)ER_	728	-3.83327	1.9309			P35749
4982	P25205	MCM3_HUMAN	_K(de)GGYTSGTFR_	248	-2.8704	1.59948			Q14919
11165	Q14566	MCM6_HUMAN	_FVDFQK(de)VR_	205	-2.98075	1.57026			P56556
6466	P40925	MDHC_HUMAN	_AQIAIK(de)IGVTANDVK_	170	-3.12831	1.34524			O95139
13988	Q9BV79	MECR_HUMAN	_NFFK(de)DMPQPR_	252	-2.85705	1.65539			O43181
8261	P58546	MTPN_HUMAN	_NGDIDEVK(de)DYVAKGEDVNR_	19	-3.9638	1.68781			Q15599
6023	P35580	MYH10_HUMAN	_AAANK(de)IVR_	1842	-4.91252	2.34404			P61916
6031	P35580	MYH10_HUMAN	_AMVNKDDIQK(de)MNPPK_	78	-4.11757	2.3612			Q9UQ80
6037	P35580	MYH10_HUMAN	_K(de)IVWIPSER_	34	-3.53706	1.71621			Q99497
6044	P35580	MYH10_HUMAN	_EVSTIK(de)NR_	1925	-3.96578	2.08993			P08237
6048	P35580	MYH10_HUMAN	_NNAIK(de)VVR_	1111	-3.45783	2.31987			Q6P2Q9
6050	P35580	MYH10_HUMAN	_HATAIEEISEQIEQAK(de)R_	1216	-3.15824	1.56095			P55786
6055	P35580	MYH10_HUMAN	_IIIK(de)QVR_	1596	-4.5498	1.66853			O15067
6056	P35580	MYH10_HUMAN	_IIK(de)DAEAISQRIEEK_	1399	-4.0172	1.97864			P31939
6069	P35580	MYH10_HUMAN	_K(de)IDGETTDIQDQIAEIQAQIDEIKIQIAK_	1059	-3.58901	1.4303			P57729
6073	P35580	MYH10_HUMAN	_K(de)MQAHIQDIEEQIDEEEGAR_	947	-3.52301	1.45045			P20340
6076	P35580	MYH10_HUMAN	_K(de)TTIQVDTINAEIAAER_	1761	-3.26249	1.31175			P18754
6089	P35580	MYH10_HUMAN	_SAAQK(de)SDNAR_	1782	-5.54217	3.5065			Q9P258
6092	P35580	MYH10_HUMAN	_VFTK(de)VKPIIQVTR_	840	-3.69165	1.65681			P51606
6138	P35749	MYH11_HUMAN	_AQTK(de)EQADFAVEAIAK_	414	-4.26257	2.02616			P83731
11278	Q14919	NC2A_HUMAN	_K(de)ACQVTQSR_	52	-3.05121	1.64857			Q02878
8239	P56556	NDUA6_HUMAN	_QATSTASTFVK(de)PIFSR_	44	-3.09787	1.44771			Q9NYK5
1676	O95139	NDUB6_HUMAN	_MGPMEK(de)FWNK_	45	-3.13612	1.4222			Q96E39
771	O43181	NDUS4_HUMAN	_SYGANFSWNK(de)R_	168	-4.40183	1.59718			Q9Y508
11752	Q15599	NHRF2_HUMAN	_K(de)GPQGYGFNIHSDK_	156	-3.20267	1.50543			Q5JTH9
8539	P61916	NPC2_HUMAN	_TYSYINKIPVK(de)SEYPSIK_	116	-3.14958	1.53716			Q9Y2R5
15323	Q9UQ80	PA2G4_HUMAN	_VAHSFNCTPIEGMISHQIK(de)QHVIDGEK_	191	-4.59039	1.76808			Q8NBX0
13682	Q99497	PARK7_HUMAN	_KGIIAAICAGPTAIIAHEIGFGSK(de)VTTHPIAK_	122	-4.37637	1.82469			P21912
2848	P08237	PFKAM_HUMAN	_IRPIIK(de)IIAK_	750	-3.10683	1.56872			Q9UGP8
2850	P08237	PFKAM_HUMAN	_NFATK(de)MGAK_	678	-3.30881	1.66545			Q15459
12364	Q6P2Q9	PRP8_HUMAN	_GATVDK(de)TVCKK_	769	-2.89397	1.44557			O75533
12379	Q6P2Q9	PRP8_HUMAN	_K(de)YVNGSTYQR_	218	-3.12984	2.14653			Q9H9B4
8180	P55786	PSA_HUMAN	_GIVIGK(de)IGK_	712	-2.71698	1.34247			Q14683
606	O15067	PUR4_HUMAN	_K(de)EFFIQR_	639	-3.64899	1.73974			Q969G3
5649	P31939	PUR9_HUMAN	_IAGDK(de)ANYWWIR_	461	-3.1832	1.44771			Q16637
8251	P57729	RAB38_HUMAN	_IIVIGDIGVGK(de)TSIIKR_	22	-2.70182	1.37893			P56693
4465	P20340	RAB6A_HUMAN	_AK(de)EINVMFIETSAK_	146	-2.83662	1.35214			Q9Y5B9
4348	P18754	RCC1_HUMAN	_VVISVSSGGQHTVIIVK(de)DKEQS_	416	-3.45968	1.45368			Q13813
14832	Q9P258	RCC2_HUMAN	_IVK(de)IFDFPGR_	377	-3.66838	1.96829			Q9C004
7652	P51606	RENBP_HUMAN	_DGRPVK(de)VQR_	126	-2.72637	1.50379			P07814
9337	P83731	RL24_HUMAN	_KAK(de)QASK_	119	-3.7241	1.37892			Q9NSE4
9818	Q02878	RL6_HUMAN	_HQEGEIFDTEKEK(de)YEITEQR_	239	-4.67693	1.39697			Q9P2J5
14673	Q9NYK5	RM39_HUMAN	_K(de)SIIAIVDGQPWDMYKPITK_	102	-4.54363	1.82624			P26640
13421	Q96E39	RMXL1_HUMAN	_AIETVFGK(de)YGR_	30	-3.03065	1.44132			P23381
15753	Q9Y508	RN114_HUMAN	_K(de)NFFISK_	96	-2.94951	1.35836			Q13148
12188	Q5JTH9	RRP12_HUMAN	_SDITVDAVK(de)IHNEIQSGSIR_	57	-4.04692	1.39403			O60343
15459	Q9Y2R5	RT17_HUMAN	_K(de)TYFAHDAIQQCTVGDIVIIR_	47	-4.57273	1.87892			Q9BWD1
12877	Q8NBX0	SCPDL_HUMAN	_IIDRINK(de)HGIEFSVISSSEV_	416	-3.34938	1.32203			P29401
4652	P21912	SDHB_HUMAN	_IAK(de)IQDPFSIYR_	233	-3.00222	1.32387			P11387
15027	Q9UGP8	SEC63_HUMAN	_IK(de)TIQDIVSIK_	407	-3.46208	1.71864			P55327
11746	Q15459	SF3A1_HUMAN	_VEWAK(de)FQER_	251	-3.5766	1.40188			A0AVT1
1416	O75533	SF3B1_HUMAN	_NRPISDEEIDAMFPEGYK(de)VIPPPAGYVPIR_	413	-3.35313	1.45514			P61088
14280	Q9H9B4	SFXN1_HUMAN	_AK(de)YIYDSAFHPDTGEK_	72	-5.09173	2.02062			Q16851
11198	Q14683	SMC1A_HUMAN	_SGEIAQEYDK(de)R_	170	-2.71985	1.43088			O60763
13275	Q969G3	SMCE1_HUMAN	_K(de)IEAEIIQIEER_	240	-3.01896	1.43467			O95292
11917	Q16637	SMN_HUMAN	_HAIK(de)NGDICETSGKPK_	55	-3.29939	1.38778			Q969T9
8243	P56693	SOX10_HUMAN	_IINESDK(de)RPFIEEAER_	150	-4.55173	1.97551			Q15061
15771	Q9Y5B9	SP16H_HUMAN	_GDK(de)VDIIYNNIK_	696	-3.23693	1.44197			P13010
10861	Q13813	SPTN1_HUMAN	_ITK(de)EAGSVSIR_	1057	-3.13196	1.74433			P12956
10863	Q13813	SPTN1_HUMAN	_KVEDIFITFAKK(de)_	2099	-3.53963	1.44035			Q9Y5V0
14111	Q9C004	SPY4_HUMAN	_IQHPITIIPIDQVK(de)TSHVENDYIDNPSIAITTGPKR_	44	-3.57052	1.45045
14112	Q9C004	SPY4_HUMAN	_TSHVENDYIDNPSIAITTGPK(de)R_	65	-4.29675	1.53196
2668	P07814	SYEP_HUMAN	_DNYSPGWK(de)FNHWEIK_	1354	-3.09049	1.48248
14522	Q9NSE4	SYIM_HUMAN	_SFAK(de)AAIEK_	189	-3.77756	1.6066
14912	Q9P2J5	SYLC_HUMAN	_VIEPYPSK(de)ISGIK_	278	-4.00477	1.53505
5157	P26640	SYVC_HUMAN	_IETMIGDVAVAVHPK(de)DTR_	552	-4.64608	2.03228
4857	P23381	SYWC_HUMAN	_IGYPKPAIIHSTFFPAIQGAQTK(de)M(ox)SASDPNSSIFITDTAK_	349	-5.65271	1.71897
10505	Q13148	TADBP_HUMAN	_FTEYETQVK(de)VMSQR_	160	-3.34912	1.97541
1041	O60343	TBCD4_HUMAN	_IQVAHTK(de)IQAIESNIENIITR_	1226	-2.84105	1.43335
14015	Q9BWD1	THIC_HUMAN	_TGVK(de)IGEMPITDSIICDGITDAFHNCHMGITAENVAKK_	136	-4.20107	1.53924
5375	P29401	TKT_HUMAN	_QAFTDVATGSIGQGIGAACGMAYTGK(de)YFDKASYR_	140	-4.11222	1.85853
3425	P11387	TOP1_HUMAN	_VEHINIHPEIDGQEYVVEFDFIGK(de)DSIR_	532	-3.42729	1.40773
8169	P55327	TPD52_HUMAN	_QNIAK(de)GWQDVTATSAYKK_	125	-3.66834	1.72516
2	A0AVT1	UBA6_HUMAN	_IAGK(de)IIPAIATTTATVSGIVAIEMIK_	889	-2.69393	1.38025
8388	P61088	UBE2N_HUMAN	_IYHPNVDK(de)IGR_	82	-3.59337	1.54961
12031	Q16851	UGPA_HUMAN	_GPSVDWGK(de)IQRPPEDSIQPYEK_	77	-4.13287	1.49432
1123	O60763	USO1_HUMAN	_IVK(de)EIEGVITK_	618	-2.84696	1.31996
1701	O95292	VAPB_HUMAN	_VEQVISIEPQHEIK(de)FR_	17	-3.72896	1.99603
13289	Q969T9	WBP2_HUMAN	_K(de)GTVYITPYR_	47	-3.90509	1.98185
11439	Q15061	WDR43_HUMAN	_NVNIIK(de)K_	491	-2.87577	1.49484
3647	P13010	XRCC5_HUMAN	_SQIPISK(de)IK_	532	-5.72143	1.99496
3624	P12956	XRCC6_HUMAN	_IGSIVDEFK(de)EIVYPPDYNPEGK_	526	-2.75254	1.35553
15806	Q9Y5V0	ZN706_HUMAN	_GQQK(de)IQSQQK_	7	-2.68293	1.34576
id	Unique identifier for each DBT-peptide specified in MaxQuant generated Desthiobiotin-ATP.txt file

## Sheet: Supp. Table 4
Supplementary Table 4: Quantification of Expression for Selected Proteins.
Actin	ACTB_HUMAN	ACTG_HUMAN
															Pre-IRON Intensity		Post-IRON Intensity		log2 Post-IRON Intensity
id	Sequence	Length	Missed cleavages	Proteins	Start position	End position	Gene names	Protein names	Unique (Groups)	Unique (Proteins)	PEP	Score	Identification type	MS/MS Count	WM164N	WM164R	WM164N	WM164R	log2 (WM164N)	log2 (WM164R)	log2 ratio WM164 (Res/Naïve)		Average log2 ratio (Resistant/Naïve)	Actin	β-tubulin	Fibronectin
6513	DDDIAAIVVDNGSGMCK	17	0	P60709	2	18	ACTB	Actin, cytoplasmic 1;Actin, cytoplasmic 1, N-terminally processed	yes	yes	6.1322e-06	42.314	By MS/MS	2	1110.7	4723.3	1484.54	6044.88	10.5358	12.5615	2.0257		WM164	1.19236	-0.18267	2.45562
5834	CPEAIFQPSFIGMESCGIHETTFNSIMK	28	0	P60709;P63261	257	284	ACTB;ACTG1	Actin, cytoplasmic 1;Actin, cytoplasmic 1, N-terminally processed;Actin, cytoplasmic 2;Actin, cytoplasmic 2, N-terminally processed	no	no	4.7478e-07	35.158	By MS/MS	2	1841.4	7643	2461.17	9781.51	11.2651	13.2558	1.99071
32458	KDIYANTVISGGTTMYPGIADR	22	1	P60709;P63261	291	312	ACTB;ACTG1	Actin, cytoplasmic 1;Actin, cytoplasmic 1, N-terminally processed;Actin, cytoplasmic 2;Actin, cytoplasmic 2, N-terminally processed	no	no	2.017e-78	150.72	By MS/MS	41	124340	342810	166190	438728	17.3425	18.743	1.40049		Standard Deviation log2 ratio (Resistant/Naïve)	Actin	β-tubulin	Fibronectin
21383	GYSFTTTAER	10	0	P60709;P63261	197	206	ACTB;ACTG1	Actin, cytoplasmic 1;Actin, cytoplasmic 1, N-terminally processed;Actin, cytoplasmic 2;Actin, cytoplasmic 2, N-terminally processed	no	no	2.9302e-40	226.46	By MS/MS	28	133100	351820	177898	450259	17.4407	18.7804	1.3397		WM164	0.741407	0.339829	1.07098
10677	EEEIAAIVIDNGSGMCK	17	0	P63261	2	18	ACTG1	Actin, cytoplasmic 2;Actin, cytoplasmic 2, N-terminally processed	yes	yes	4.7056e-12	86.548	By MS/MS	3	5494.9	14288	7344.36	18285.8	12.8424	14.1584	1.31601
50895	VAPEEHPVIITEAPINPK	18	0	P60709;P63261	96	113	ACTB;ACTG1	Actin, cytoplasmic 1;Actin, cytoplasmic 1, N-terminally processed;Actin, cytoplasmic 2;Actin, cytoplasmic 2, N-terminally processed	no	no	1.7001e-39	132.84	By MS/MS	108	79909	206420	106805	264176	16.7046	18.0111	1.30653
8152	DIYANTVISGGTTMYPGIADR	21	0	P60709;P63261	292	312	ACTB;ACTG1	Actin, cytoplasmic 1;Actin, cytoplasmic 1, N-terminally processed;Actin, cytoplasmic 2;Actin, cytoplasmic 2, N-terminally processed	no	no	9.3348e-79	154.34	By MS/MS	36	64410	140750	86089	180132	16.3935	17.4587	1.06515
49937	TTGIVMDSGDGVTHTVPIYEGYAIPHAIIR	30	0	P60709;P63261	148	177	ACTB;ACTG1	Actin, cytoplasmic 1;Actin, cytoplasmic 1, N-terminally processed;Actin, cytoplasmic 2;Actin, cytoplasmic 2, N-terminally processed	no	no	8.5146e-147	173.36	By MS/MS	30	49994	88307	66820.9	113015	16.028	16.7862	0.758148
56759	YPIEHGIVTNWDDMEK	16	0	P60709;P63261	69	84	ACTB;ACTG1	Actin, cytoplasmic 1;Actin, cytoplasmic 1, N-terminally processed;Actin, cytoplasmic 2;Actin, cytoplasmic 2, N-terminally processed	no	no	7.017e-08	77.746	By MS/MS	10	6354.6	4787.2	8493.42	6126.66	13.0521	12.5809	-0.471244
>sp|P07437|TBB5_HUMAN Tubulin beta chain OS=Homo sapiens GN=TUBB PE=1 SV=2
															Pre-IRON Intensity		Post-IRON Intensity		log2 Post-IRON Intensity
id	Sequence	Length	Missed cleavages	Proteins	Start position	End position	Gene names	Protein names	Unique (Groups)	Unique (Proteins)	PEP	Score	Identification type	MS/MS Count	WM164N	WM164R	WM164N	WM164R	log2 (WM164N)	log2 (WM164R)	log2 ratio WM164 (Res/Naïve)
17185	FWEVISDEHGIDPTGTYHGDSDIQIDR	27	0	P07437	20	46	TUBB	Tubulin beta chain	yes	yes	7.4666e-16	54.521	By MS/MS	2	1622.9	2024.1	2169.13	2590.44	11.0829	11.339	0.256082
34974	MAVTFIGNSTAIQEIFK	17	0	P07437	363	379	TUBB	Tubulin beta chain	yes	yes	8.8657e-11	69.331	By MS/MS	6	8464.4	7999.9	11313.3	10238.3	13.4657	13.3217	-0.144051
30308	ISVYYNEATGGK	12	0	P07437	47	58	TUBB	Tubulin beta chain	yes	yes	2.1946e-16	131.32	By MS/MS	7	30090	25835	40217.6	33063.6	15.2955	15.013	-0.282582
2993	AITVPEITQQVFDAK	15	0	P07437	283	297	TUBB	Tubulin beta chain	yes	yes	4.4846e-43	160.78	By MS/MS	20	59427	42094	79428.8	53871.9	16.2774	15.7172	-0.560129
>sp|P02751|FINC_HUMAN Fibronectin OS=Homo sapiens GN=FN1 PE=1 SV=4
															Pre-IRON Intensity		Post-IRON Intensity		log2 Post-IRON Intensity
id	Sequence	Length	Missed cleavages	Proteins	Start position	End position	Gene names	Protein names	Unique (Groups)	Unique (Proteins)	PEP	Score	Identification type	MS/MS Count	WM164N	WM164R	WM164N	WM164R	log2 (WM164N)	log2 (WM164R)	log2 ratio WM164 (Res/Naïve)
18380	GFNCESKPEAEETCFDK	17	1	P02751	84	100	FN1	Fibronectin;Anastellin;Ugl-Y1;Ugl-Y2;Ugl-Y3	yes	yes	9.2932e-11	64.275	By MS/MS	2	1623.6	40033	2170.07	51234.2	11.0835	15.6448	4.5613
18381	GFNCESKPEAEETCFDKYTGNTYR	24	2	P02751	84	107	FN1	Fibronectin;Anastellin;Ugl-Y1;Ugl-Y2;Ugl-Y3	yes	yes	5.8073e-109	173.89	By MS/MS	3	10733	219870	14345.5	281390	13.8083	18.1022	4.2939
23097	IAWESPQGQVSR	12	0	P02751	1650	1661	FN1	Fibronectin;Anastellin;Ugl-Y1;Ugl-Y2;Ugl-Y3	yes	yes	9.9867e-25	163.51	By MS/MS	2	3653.5	74287	4883.19	95072.5	12.2536	16.5367	4.28313
13962	ESKPITAQQTTK	12	1	P02751	985	996	FN1	Fibronectin;Anastellin;Ugl-Y1;Ugl-Y2;Ugl-Y3	yes	yes	1.9099e-05	91.812	By MS/MS	3	8834.9	175430	11808.5	224515	13.5275	17.7765	4.24891
55900	YEVSVYAIK	9	0	P02751	1788	1796	FN1	Fibronectin;Anastellin;Ugl-Y1;Ugl-Y2;Ugl-Y3	yes	yes	1.1805e-08	157.96	By MS/MS	3	10665	211330	14254.6	270460	13.7991	18.0451	4.24592
25061	IGEKWDR	7	1	P02751	2260	2266	FN1	Fibronectin;Anastellin;Ugl-Y1;Ugl-Y2;Ugl-Y3	yes	yes	0.037166	57.177	By MS/MS	2	5829.6	115510	7791.71	147830	12.9277	17.1736	4.24585
5797	CNDQDTR	7	0	P02751	231	237	FN1	Fibronectin;Anastellin;Ugl-Y1;Ugl-Y2;Ugl-Y3	yes	yes	0.030017	77.282	By MS/MS	2	755.34	14782	1009.57	18918	9.97953	14.2075	4.22795
25002	IGDQWDK	7	0	P02751	480	486	FN1	Fibronectin;Anastellin;Ugl-Y1;Ugl-Y2;Ugl-Y3	yes	yes	0.013287	91.853	By MS/MS	1	2003.1	38414	2677.3	49162.2	11.3866	15.5853	4.1987
46944	SYTITGIQPGTDYK	14	0	P02751	1867	1880	FN1	Fibronectin;Anastellin;Ugl-Y1;Ugl-Y2;Ugl-Y3	yes	yes	6.5679e-11	107.53	By MS/MS	11	7721.2	126380	10320	161741	13.3332	17.3033	3.97017
7906	DIQFVEVTDVK	11	0	P02751	912	922	FN1	Fibronectin;Anastellin;Ugl-Y1;Ugl-Y2;Ugl-Y3	yes	yes	5.5028e-05	92.856	By MS/MS	6	4523	67504	6045.34	86391.6	12.5616	16.3986	3.837
41680	QYNVGPSVSKYPIR	14	1	P02751	1041	1054	FN1	Fibronectin;Anastellin;Ugl-Y1;Ugl-Y2;Ugl-Y3	yes	yes	1.2932e-23	131.66	By MS/MS	3	8802.2	127280	11764.8	162893	13.5222	17.3136	3.79137
36897	NGPGPTK	7	0	P02751	1580	1586	FN1	Fibronectin;Anastellin;Ugl-Y1;Ugl-Y2;Ugl-Y3	yes	yes	0.02238	80.438	By MS/MS	2	3986	54030	5327.6	69147.6	12.3793	16.0774	3.69812
30561	ITGYIIK	7	0	P02751	1930	1936	FN1	Fibronectin;Anastellin;Ugl-Y1;Ugl-Y2;Ugl-Y3	yes	yes	0.014938	87.323	By MS/MS	2	10016	129810	13387.2	166131	13.7086	17.342	3.6334
3901	AQITGYR	7	0	P02751	1022	1028	FN1	Fibronectin;Anastellin;Ugl-Y1;Ugl-Y2;Ugl-Y3	yes	yes	0.0013887	142.64	By MS/MS	2	5399.1	68835	7216.32	88095	12.817	16.4268	3.60973
47657	TEIDKPSQMQVTDVQDNSISVK	22	1	P02751	1540	1561	FN1	Fibronectin;Anastellin;Ugl-Y1;Ugl-Y2;Ugl-Y3	yes	yes	0.003558	21.242	By MS/MS	2	557.97	6746.5	745.77	8634.17	9.54259	13.0758	3.53325
48993	TKTETITGFQVDAVPANGQTPIQR	24	1	P02751	1836	1859	FN1	Fibronectin;Anastellin;Ugl-Y1;Ugl-Y2;Ugl-Y3	yes	yes	1.0968e-20	62.781	By MS/MS	2	336.51	3699.7	449.772	4734.88	8.81305	12.2091	3.39606
5453	CDPHEATCYDDGK	13	0	P02751	2288	2300	FN1	Fibronectin;Anastellin;Ugl-Y1;Ugl-Y2;Ugl-Y3	yes	yes	6.2902e-05	50.897	By MS/MS	4	2378.8	24370	3179.45	31188.7	11.6346	14.9287	3.29418
55296	WKCDPVDQCQDSETGTFYQIGDSWEK	26	1	P02751	553	578	FN1	Fibronectin;Anastellin;Ugl-Y1;Ugl-Y2;Ugl-Y3	yes	yes	3.4797e-30	72.499	By MS/MS	4	8455.2	78764	11301	100802	13.4642	16.6212	3.157
30923	ITYGETGGNSPVQEFTVPGSK	21	0	P02751	1480	1500	FN1	Fibronectin;Anastellin;Ugl-Y1;Ugl-Y2;Ugl-Y3	yes	yes	7.4105e-39	110.6	By MS/MS	4	9243.6	84910	12354.8	108668	13.5928	16.7296	3.13678
18237	GEWTCKPIAEK	11	1	P02751	175	185	FN1	Fibronectin;Anastellin;Ugl-Y1;Ugl-Y2;Ugl-Y3	yes	yes	0.00076794	57.175	By MS/MS	5	16360	148400	21866.4	189922	14.4164	17.5351	3.11862
49166	TNTNVNCPIECFMPIDVQADREDSRE	26	2	P02751	2361	2386	FN1	Fibronectin;Anastellin;Ugl-Y1;Ugl-Y2;Ugl-Y3	yes	yes	3.6017e-05	28.091	By MS/MS	2	1200.2	10546	1604.16	13496.8	10.6476	13.7203	3.07272
55262	WIPSSSPVTGYR	12	0	P02751	1562	1573	FN1	Fibronectin;Anastellin;Ugl-Y1;Ugl-Y2;Ugl-Y3	yes	yes	1.9447e-19	138.24	By MS/MS	2	16173	121740	21616.5	155803	14.3998	17.2494	2.84952
38326	NTFAEVTGISPGVTYYFK	18	0	P02751	959	976	FN1	Fibronectin;Anastellin;Ugl-Y1;Ugl-Y2;Ugl-Y3	yes	yes	6.9862e-13	89.374	By MS/MS	7	9427.3	68884	12600.3	88157.8	13.6212	16.4278	2.80663
55866	YEKPGSPPR	9	1	P02751	1937	1945	FN1	Fibronectin;Anastellin;Ugl-Y1;Ugl-Y2;Ugl-Y3	yes	yes	0.0014593	64.268	By MS/MS	4	12752	92667	17044	118595	14.057	16.8557	2.79871
25520	IGVRPSQGGEAPR	13	1	P02751	1117	1129	FN1	Fibronectin;Anastellin;Ugl-Y1;Ugl-Y2;Ugl-Y3	yes	yes	3.6841e-16	119.39	By MS/MS	6	9345.7	67296	12491.3	86125.4	13.6086	16.3942	2.78552
18873	GIAFTDVDVDSIK	13	0	P02751	1637	1649	FN1	Fibronectin;Anastellin;Ugl-Y1;Ugl-Y2;Ugl-Y3	yes	yes	1.3578e-81	211.38	By MS/MS	7	36139	248450	48302.6	317966	15.5598	18.2785	2.7187
15707	FGFCPMAAHEEICTTNEGVMYR	22	0	P02751	458	479	FN1	Fibronectin;Anastellin;Ugl-Y1;Ugl-Y2;Ugl-Y3	yes	yes	6.7518e-47	121.26	By MS/MS	4	4006.6	25512	5355.13	32650.3	12.3867	14.9948	2.6081
39391	QDGHIWCSTTSNYEQDQK	18	0	P02751	380	397	FN1	Fibronectin;Anastellin;Ugl-Y1;Ugl-Y2;Ugl-Y3	yes	yes	1.9347e-11	68.243	By MS/MS	4	2340.2	14892	3127.86	19058.8	11.611	14.2182	2.60721
9182	DTITSRPAQGVVTTIENVSPPR	22	1	P02751	1797	1818	FN1	Fibronectin;Anastellin;Ugl-Y1;Ugl-Y2;Ugl-Y3	yes	yes	0.031108	16.867	By MS/MS	1	667.47	4229.5	892.125	5412.91	9.8011	12.4022	2.60109
31935	IYIYTINDNAR	11	0	P02751	1881	1891	FN1	Fibronectin;Anastellin;Ugl-Y1;Ugl-Y2;Ugl-Y3	yes	yes	2.5136e-09	124.67	By MS/MS	4	32796	205400	43834.4	262871	15.4198	18.004	2.58422
17923	GDSPASSKPISINYR	15	1	P02751	1525	1539	FN1	Fibronectin;Anastellin;Ugl-Y1;Ugl-Y2;Ugl-Y3	yes	yes	6.0436e-07	59.68	By MS/MS	3	5547.4	34583	7414.53	44259.3	12.8561	15.4337	2.57755
6311	DAPIVNK	7	0	P02751	1163	1169	FN1	Fibronectin;Anastellin;Ugl-Y1;Ugl-Y2;Ugl-Y3	yes	yes	0.014938	87.323	By MS/MS	4	14558	90431	19457.9	115734	14.2481	16.8204	2.57238
46417	STTPDITGYR	10	0	P02751	1198	1207	FN1	Fibronectin;Anastellin;Ugl-Y1;Ugl-Y2;Ugl-Y3	yes	yes	0.00077709	77.14	By MS/MS	3	5044	30999	6741.7	39672.5	12.7189	15.2759	2.55696
51852	VGDTYERPK	9	1	P02751	108	116	FN1	Fibronectin;Anastellin;Ugl-Y1;Ugl-Y2;Ugl-Y3	yes	yes	0.00059178	105.98	By MS/MS	6	16894	103820	22580.1	132869	14.4628	17.0196	2.55688
46059	SSPVVIDASTAIDAPSNIR	19	0	P02751	1892	1910	FN1	Fibronectin;Anastellin;Ugl-Y1;Ugl-Y2;Ugl-Y3	yes	yes	1.9314e-17	85.937	By MS/MS	6	4947.6	29436	6612.85	37672.2	12.6911	15.2012	2.51016
55022	WCGTTQNYDADQK	13	0	P02751	445	457	FN1	Fibronectin;Anastellin;Ugl-Y1;Ugl-Y2;Ugl-Y3	yes	yes	1.8249e-07	96.745	By MS/MS	3	5604.5	33174	7490.85	42456.1	12.8709	15.3737	2.50277
41679	QYNVGPSVSK	10	0	P02751	1041	1050	FN1	Fibronectin;Anastellin;Ugl-Y1;Ugl-Y2;Ugl-Y3	yes	yes	0.00085465	75.819	By MS/MS	2	5760.7	33514	7699.62	42891.2	12.9106	15.3884	2.47782
50561	TYHVGEQWQK	10	0	P02751	2301	2310	FN1	Fibronectin;Anastellin;Ugl-Y1;Ugl-Y2;Ugl-Y3	yes	yes	1.1066e-05	95.523	By MS/MS	3	9480.9	54526	12672	69782.4	13.6294	16.0906	2.46122
47955	TFYSCTTEGR	10	0	P02751	370	379	FN1	Fibronectin;Anastellin;Ugl-Y1;Ugl-Y2;Ugl-Y3	yes	yes	0.0060921	48.981	By MS/MS	2	3244	18130	4335.86	23202.8	12.0821	14.502	2.41991
39232	QAQQMVQPQSPVAVSQSKPGCYDNGK	26	1	P02751	32	57	FN1	Fibronectin;Anastellin;Ugl-Y1;Ugl-Y2;Ugl-Y3	yes	yes	0.048173	13.446	By MS/MS	3	800.13	4371.9	1069.44	5595.16	10.0626	12.45	2.38733
30889	ITVGITR	7	0	P02751	1029	1035	FN1	Fibronectin;Anastellin;Ugl-Y1;Ugl-Y2;Ugl-Y3	yes	yes	0.031379	91.9	By MS/MS	3	12528	67240	16744.6	86053.8	14.0314	16.393	2.36154
16978	FTNIGPDTMR	10	0	P02751	1275	1284	FN1	Fibronectin;Anastellin;Ugl-Y1;Ugl-Y2;Ugl-Y3	yes	yes	0.0011199	72.187	By MS/MS	1	4151.5	20760	5548.8	26568.7	12.438	14.6974	2.25948
42291	RPGGEPSPEGTTGQSYNQYSQR	22	1	P02751	2335	2356	FN1	Fibronectin;Anastellin;Ugl-Y1;Ugl-Y2;Ugl-Y3	yes	yes	1.5512e-08	38.949	By MS/MS	4	746.22	3652.7	997.381	4674.73	9.962	12.1907	2.22867
37421	NIQPASEYTVSIVAIK	16	0	P02751	1055	1070	FN1	Fibronectin;Anastellin;Ugl-Y1;Ugl-Y2;Ugl-Y3	yes	yes	6.6277e-25	124.25	By MS/MS	6	17576	83328	23491.7	106643	14.5199	16.7024	2.18257
54284	VTIMWTPPESAVTGYR	16	0	P02751	923	938	FN1	Fibronectin;Anastellin;Ugl-Y1;Ugl-Y2;Ugl-Y3	yes	yes	1.0753e-13	103.01	By MS/MS	6	20922	98609	27963.9	126200	14.7713	16.9454	2.17407
18236	GEWTCIAYSQIR	12	0	P02751	504	515	FN1	Fibronectin;Anastellin;Ugl-Y1;Ugl-Y2;Ugl-Y3	yes	yes	9.9152e-05	83.652	By MS/MS	6	9291.4	42739	12418.7	54697.4	13.6002	15.7392	2.13896
50573	TYIGNAIVCTCYGGSR	16	0	P02751	68	83	FN1	Fibronectin;Anastellin;Ugl-Y1;Ugl-Y2;Ugl-Y3	yes	yes	1.2128e-13	102.08	By MS/MS	5	17787	81488	23773.7	104288	14.5371	16.6702	2.13314
6570	DDKESVPISDTIIPAVPPPTDIR	23	1	P02751	1252	1274	FN1	Fibronectin;Anastellin;Ugl-Y1;Ugl-Y2;Ugl-Y3	yes	yes	2.7084e-05	30.597	By MS/MS	3	1158.9	5223.1	1548.96	6684.52	10.5971	12.7066	2.10953
29698	ISCTIANR	8	0	P02751	133	140	FN1	Fibronectin;Anastellin;Ugl-Y1;Ugl-Y2;Ugl-Y3	yes	yes	0.0039965	86.67	By MS/MS	4	15428	66251	20620.7	84788	14.3318	16.3716	2.03977
9005	DSMIWDCTCIGAGR	14	0	P02751	117	130	FN1	Fibronectin;Anastellin;Ugl-Y1;Ugl-Y2;Ugl-Y3	yes	yes	0.0068715	50.108	By MS/MS	1	2531.7	10822	3383.81	13850	11.7244	13.7576	2.03316
15896	FIATTPNSIIVSWQPPR	17	0	P02751	1911	1927	FN1	Fibronectin;Anastellin;Ugl-Y1;Ugl-Y2;Ugl-Y3	yes	yes	7.0314e-08	50.305	By MS/MS	1	140.46	575.55	187.736	736.589	7.55256	9.52472	1.97216
51632	VFAVSHGR	8	0	P02751	977	984	FN1	Fibronectin;Anastellin;Ugl-Y1;Ugl-Y2;Ugl-Y3	yes	yes	0.00040313	105.81	By MS/MS	2	9973.7	40851	13330.6	52281.1	13.7025	15.674	1.97155
56936	YSFCTDHTVIVQTR	14	0	P02751	398	411	FN1	Fibronectin;Anastellin;Ugl-Y1;Ugl-Y2;Ugl-Y3	yes	yes	5.1723e-08	97.273	By MS/MS	4	12735	50864	17021.3	65095.8	14.0551	15.9903	1.93522
55023	WCHDNGVNYK	10	0	P02751	2250	2259	FN1	Fibronectin;Anastellin;Ugl-Y1;Ugl-Y2;Ugl-Y3	yes	yes	0.00016187	79.148	By MS/MS	3	6185.2	23766	8267	30415.7	13.0131	14.8925	1.87938
53518	VPGTSTSATITGITR	15	0	P02751	2150	2164	FN1	Fibronectin;Anastellin;Ugl-Y1;Ugl-Y2;Ugl-Y3	yes	yes	0.0047833	29.58	By MS/MS	2	4017.7	13643	5369.97	17460.3	12.3907	14.0918	1.70109
5605	CHEGGQSYK	9	0	P02751	141	149	FN1	Fibronectin;Anastellin;Ugl-Y1;Ugl-Y2;Ugl-Y3	yes	yes	0.0047964	46.462	By MS/MS	2	5437	17022	7266.97	21784.8	12.8271	14.411	1.58389
51853	VGDTYERPKDSMIWDCTCIGAGR	23	2	P02751	108	130	FN1	Fibronectin;Anastellin;Ugl-Y1;Ugl-Y2;Ugl-Y3	yes	yes	2.4601e-13	47.564	By MS/MS	2	7250.9	22334	9691.39	28583.1	13.2425	14.8029	1.56038
25003	IGDQWDKQHDMGHMMR	16	1	P02751	480	495	FN1	Fibronectin;Anastellin;Ugl-Y1;Ugl-Y2;Ugl-Y3	yes	yes	2.2692e-06	47.548	By MS/MS	7	31716	96419	42390.9	123397	15.3715	16.9129	1.54148
5454	CDPHEATCYDDGKTYHVGEQWQK	23	1	P02751	2288	2310	FN1	Fibronectin;Anastellin;Ugl-Y1;Ugl-Y2;Ugl-Y3	yes	yes	0.018885	16.324	By MS/MS	1	5623.1	16131	7515.71	20644.5	12.8757	14.3335	1.45777
55420	WSRPQAPITGYR	12	1	P02751	831	842	FN1	Fibronectin;Anastellin;Ugl-Y1;Ugl-Y2;Ugl-Y3	yes	yes	2.2073e-12	113.61	By MS/MS	4	18653	52843	24931.2	67628.5	14.6057	16.0453	1.43968
19884	GNIIQCICTGNGR	13	0	P02751	253	265	FN1	Fibronectin;Anastellin;Ugl-Y1;Ugl-Y2;Ugl-Y3	yes	yes	0.00021273	70.68	By MS/MS	4	23678	64167	31647.5	82120.9	14.9498	16.3255	1.37566
22338	HYQINQQWER	10	0	P02751	58	67	FN1	Fibronectin;Anastellin;Ugl-Y1;Ugl-Y2;Ugl-Y3	yes	yes	1.6665e-05	92.428	By MS/MS	4	17349	42651	23188.3	54584.8	14.5011	15.7362	1.2351
9183	DTITSRPAQGVVTTIENVSPPRR	23	2	P02751	1797	1819	FN1	Fibronectin;Anastellin;Ugl-Y1;Ugl-Y2;Ugl-Y3	yes	yes	2.0749e-08	37.28	By MS/MS	1	1323.8	3232.9	1769.36	4137.47	10.789	12.0145	1.22552
8661	DQCIVDDITYNVNDTFHK	18	0	P02751	516	533	FN1	Fibronectin;Anastellin;Ugl-Y1;Ugl-Y2;Ugl-Y3	yes	yes	0.030376	16.615	By MS/MS	1	876.6	2074	1171.64	2654.31	10.1943	11.3741	1.1798
51333	VDVIPVNIPGEHGQR	15	0	P02751	939	953	FN1	Fibronectin;Anastellin;Ugl-Y1;Ugl-Y2;Ugl-Y3	yes	yes	1.073e-13	108.14	By MS/MS	4	17568	41108	23481	52610	14.5192	15.6831	1.16384
25900	IICQCIGFGSGHFR	14	0	P02751	2231	2244	FN1	Fibronectin;Anastellin;Ugl-Y1;Ugl-Y2;Ugl-Y3	yes	yes	2.0159e-05	59.77	By MS/MS	4	7170.1	15596	9583.39	19959.8	13.2263	14.2848	1.05849
50003	TTPPTTATPIR	11	0	P02751	2060	2070	FN1	Fibronectin;Anastellin;Ugl-Y1;Ugl-Y2;Ugl-Y3	yes	yes	0.0034048	45.829	By MS/MS	1	3498.1	7403.4	4675.48	9474.87	12.1909	13.2099	1.01899
47763	TETITGFQVDAVPANGQTPIQR	22	0	P02751	1838	1859	FN1	Fibronectin;Anastellin;Ugl-Y1;Ugl-Y2;Ugl-Y3	yes	yes	3.3737e-09	44.441	By MS/MS	2	1292	2226.8	1726.86	2849.86	10.7539	11.4767	0.722741
17000	FTQVTPTSISAQWTPPNVQITGYR	24	0	P02751	1730	1753	FN1	Fibronectin;Anastellin;Ugl-Y1;Ugl-Y2;Ugl-Y3	yes	yes	3.521e-34	90.778	By MS/MS	6	23007	39154	30750.6	50109.3	14.9083	15.6128	0.704462
22209	HTSVQTTSSGSGPFTDVR	18	0	P02751	273	290	FN1	Fibronectin;Anastellin;Ugl-Y1;Ugl-Y2;Ugl-Y3	yes	yes	7.7869e-05	33.667	By MS/MS	2	1601.5	2523.9	2140.53	3230.09	11.0638	11.6574	0.593606
43210	SDTVPSPR	8	0	P02751	904	911	FN1	Fibronectin;Anastellin;Ugl-Y1;Ugl-Y2;Ugl-Y3	yes	yes	0.0025687	96.948	By MS/MS	2	20991	31583	28056.1	40419.9	14.776	15.3028	0.526752
39914	QHDMGHMMR	9	0	P02751	487	495	FN1	Fibronectin;Anastellin;Ugl-Y1;Ugl-Y2;Ugl-Y3	yes	yes	0.0062053	44.425	By MS/MS	2	7815	11417	10445.4	14611.5	13.3506	13.8348	0.484241
49165	TNTNVNCPIECFMPIDVQADR	21	0	P02751	2361	2381	FN1	Fibronectin;Anastellin;Ugl-Y1;Ugl-Y2;Ugl-Y3	yes	yes	2.6212e-05	29.842	By MS/MS	1	306.57	402.77	409.755	515.465	8.67862	9.00973	0.331115

[truncated: 7 more sheets: Supp. Table 5, Supp. Table 6, Supp. Table 7, Supp. Table 8, Supp. Table 9A, Supp. Table 9B, Supp. Table 9C]
